# Supplementary material for: Diversity across major and candidate genes in European local pig breeds
Source: PLoS One. 2018 Nov 20;13(11):e0207475. doi: 10.1371/journal.pone.0207475 (PMC6245784; doi:10.1371/journal.pone.0207475)
Supplement: S1 Table — (XLSX) [file pone.0207475.s001.xlsx]

## Sheet: INIA_treasure_Results_OA1_OA2
ID	BREED	ACACA:c.5634T>C	ACSL4:c.2645G>A	ADIPOQ:c.1735G>A	AHR:c.2149G>T	CAPNS1:c.429A>C	CAST:g.103299934G>A	CYB5A:g.149737752G>T	CYP2E1:g. 141690107C>T	ESR1:c.669T>C	FASN:g.926299G>A	FTO:g. 31460242A>T	FUT1:g.54079560T>C	GBP5:g.127301202G>T	IGF2:g. 1483832G>A	KIT:g. 41488472C>T	LEP:g.20111759A>G	LEPR:c.1987C>T	MC1R:g. 181905G>A	MC1R:g.181461G>A	MC1R:g.181697C>T	MC1R:g.181818G>A	MC1R:g.181825T>C	MC1R:g.182126CC>*	MC4R:c.892G>A	MSTN:g.94629248C>T	MTTP:c.2573T>C	MUC4:g.134226654C>G	NR6A1:C.748T>C	PCK1:c.2456A>C	PHKG1:g. 16830320C>A	PPARD:g.31281804G>A	PPARGC1:c.1288T>A	PRKAG3:g. 120863533G>A	PRKAG3:g. 120863537G>A	RYR1:c.1843C>T	SCD:g.111461751C>T	TAS2R39:g.7068883T>G	TAS2R4:g.8135115A>T	TYRP1:g.209733431A>G
1	Alentejana	CT	GG	GG	TT	CC	NA	TT	CC	AA	GA	TT	CC	GG	GG	CC	GG	TT	GG	GG	CC	GA	TT	insCCinsCC	GG	TC	CC	CC	TT	AA	CC	GG	AA	GG	GA	CC	TT	GG	AA	AA
2	Alentejana	CT	AA	GG	TT	CC	AA	GT	CC	AA	AA	AT	CC	GG	GG	CC	GA	TT	GG	GG	CC	AA	TT	insCCinsCC	GG	TT	CC	CC	TT	NA	CC	GG	AA	GG	GA	CC	TT	GG	AA	AA
3	Alentejana	TT	AA	GG	TT	AA	GA	GG	CC	AA	AA	AT	CC	GG	GG	CC	AA	TT	GG	GG	CC	AA	TT	insCCinsCC	GG	TC	CC	CC	TT	AC	CC	GG	AA	GG	AA	CC	TT	GG	AA	AA
4	Alentejana	TT	AA	GG	GT	AC	NA	GG	CC	AA	GA	TT	TC	GG	GG	CC	GA	TT	GG	GG	CC	GA	TT	insCCinsCC	GG	TC	CT	CC	TT	AA	CC	GG	AA	GG	GA	CC	TT	GG	AA	AA
5	Alentejana	CC	GA	GA	GT	AC	AA	GG	CC	AA	GA	TT	CC	GG	GG	CC	AA	TT	GG	GG	CC	AA	TT	insCCdel--	GG	TC	CT	CC	TT	AA	CC	GG	AA	GG	AA	CC	TT	GG	AA	AA
6	Alentejana	CT	GG	GG	TT	AC	AA	GT	CC	AA	AA	TT	TC	GG	GG	CC	AA	TT	GG	GG	CC	AA	TT	insCCinsCC	GG	TC	CT	CC	TT	AA	CC	GG	AA	GG	AA	CC	TT	GG	AA	AA
7	Alentejana	CT	AA	GG	TT	CC	AA	TT	CC	AA	AA	AT	CC	GG	GG	CC	AA	TT	GG	GG	CC	AA	TT	del--del--	GG	TT	CT	CC	TT	AA	CC	GG	AA	GG	AA	CC	TT	TG	AA	AA
8	Alentejana	CC	AA	GG	TT	CC	GG	GT	CC	AA	AA	AT	CC	GG	GG	CC	AA	TT	GG	GG	CC	AA	TT	insCCinsCC	GG	TT	CC	CC	TT	AC	CC	GG	AA	GG	AA	CC	TT	GG	AA	AA
9	Alentejana	CC	AA	GG	TT	CC	NA	TT	CC	AA	AA	AT	CC	GG	GG	CC	AA	TT	GG	GG	CC	AA	TT	insCCdel--	GG	TT	CT	CC	TT	AA	CC	GG	AA	GG	AA	CC	TT	GG	AA	AA
10	Alentejana	CT	GA	GG	TT	AC	AA	GT	CC	AA	AA	AT	TC	GG	GG	CC	GG	TT	GG	GG	CC	GA	TT	insCCinsCC	GG	TC	CC	CC	TT	AA	CC	GG	AA	GG	GA	CC	TT	GG	AA	AA
11	Alentejana	CT	GA	GA	GG	CC	AA	GT	CC	AA	GA	AT	CC	GG	GG	CC	GA	TT	GG	GG	CC	AA	TT	insCCdel--	GA	CC	CT	CC	TT	AA	CC	GG	AA	GG	AA	CC	TT	GG	AA	AA
12	Alentejana	CC	GA	GG	TT	AC	AA	GT	CC	AA	GA	AT	CC	GG	GG	CC	AA	TT	GG	GG	CC	GA	TT	insCCinsCC	GG	TT	CT	CC	TT	AA	CC	GG	TA	GG	AA	CC	TT	GG	AA	AA
13	Alentejana	CT	AA	GG	TT	CC	GG	GT	CC	AA	NA	AT	CC	GT	GG	CC	AA	TT	GG	GG	CC	GA	TT	insCCinsCC	GG	TT	CT	CC	TT	AC	CC	GG	AA	GG	AA	CC	TT	GG	AA	AA
14	Alentejana	CT	GA	GG	TT	AC	NA	GG	CC	AA	GA	AA	CC	GG	GG	CC	AA	TT	GG	GG	CC	AA	TT	insCCinsCC	GG	TT	CT	CC	TC	AA	CC	GG	AA	GG	AA	CC	TT	GG	AA	AA
15	Alentejana	TT	GA	GG	TT	AC	AA	GT	CC	AA	AA	AT	TC	GG	GG	CC	AA	TT	GG	GG	CC	AA	TT	insCCinsCC	GG	TT	CC	CC	TT	AA	CC	GG	AA	GG	GA	CC	TT	GG	AA	AA
16	Alentejana	CC	GG	GG	TT	AC	NA	GT	CC	AA	AA	TT	CC	GG	GG	CC	AA	TT	GG	GG	CC	AA	TT	insCCinsCC	GA	TT	CT	CC	TT	AA	CC	GG	TA	GG	AA	CC	TT	GG	AA	AA
17	Alentejana	TT	AA	GG	TT	CC	AA	GT	CC	AA	NA	TT	CC	GG	GG	CC	AA	TT	GG	GG	CC	GA	TT	insCCinsCC	GG	TT	CC	CC	TT	AA	CC	GG	AA	GG	AA	CC	TT	GG	AA	AA
18	Alentejana	TT	AA	GG	TT	CC	AA	TT	CC	AA	AA	AA	CC	GG	GG	CC	AA	TT	GG	GG	CC	GA	TT	insCCinsCC	GG	TT	CT	CC	TT	AA	CC	GG	AA	GG	GA	CC	TT	GG	AA	AA
19	Alentejana	TT	AA	GG	TT	AC	NA	GT	CC	AA	AA	AT	CC	GG	GG	CC	GA	TT	GG	GG	CC	AA	TT	insCCinsCC	GG	TC	CC	CC	TC	AA	CC	GG	AA	GG	GG	CC	TT	GG	AA	AA
20	Alentejana	TT	GG	GG	TT	AC	GG	GT	CC	AA	GA	AT	CC	GG	GG	CC	AA	TT	GG	GG	CC	AA	TT	insCCinsCC	GG	TT	CT	CC	TC	AA	NA	GG	AA	GG	GA	CC	TT	GG	AA	AA
21	Alentejana	CT	GG	GG	TT	AC	AA	GT	CC	AA	AA	AT	CC	GG	GG	CC	AA	TT	GG	GG	CC	GG	TT	insCCinsCC	GG	TT	TT	CC	TT	AA	CC	GG	AA	GG	GA	CC	TT	GG	AA	AA
22	Alentejana	TT	GG	GG	TT	CC	NA	GG	CC	AA	AA	AT	CC	GG	GG	CC	GA	TT	GG	GG	CC	AA	TT	insCCinsCC	GG	TT	CT	CC	TT	AA	CC	GG	AA	GG	GA	CC	TT	GG	AA	AA
23	Alentejana	TT	GA	GG	TT	AC	AA	TT	CC	AA	NA	TT	CC	GG	GG	CC	GA	TT	GG	GG	CC	GA	TT	insCCinsCC	GG	TT	CT	CC	TT	AA	CC	GG	AA	GG	AA	CC	TT	GG	AA	AA
24	Alentejana	TT	GG	GG	TT	AC	NA	GT	CC	AA	AA	AT	CC	GG	GG	CC	AA	TT	GG	GG	CC	AA	TT	insCCinsCC	GG	TT	TT	CC	NA	AA	CC	GG	AA	GG	GA	CC	TT	GG	AA	AA
25	Alentejana	CT	GA	GG	TT	CC	NA	GT	CC	AA	GA	AT	CC	GG	GG	CC	AA	TT	GG	GG	CC	AA	TT	insCCinsCC	GG	TT	CT	CC	TT	NA	CC	GG	AA	GG	GG	CC	TT	GG	AA	AA
26	Alentejana	TT	GA	GG	TT	AC	NA	GT	CC	AA	GA	AA	CC	GG	GG	CC	AA	TT	GG	GG	CC	GA	TT	insCCinsCC	GG	TT	TT	CC	TC	AA	CC	GG	AA	GG	AA	CC	TT	GG	AA	AA
27	Alentejana	TT	AA	GG	TT	CC	GG	GT	CC	AA	NA	AT	CC	GG	GG	CC	AA	TT	GG	GG	CC	AA	TT	insCCinsCC	GG	TC	CT	CC	TC	AA	CC	GG	AA	GG	GG	CC	TT	GG	AA	AA
28	Alentejana	CT	AA	GG	TT	AC	AA	GG	CC	AA	AA	TT	CC	GG	GG	CC	AA	TT	GG	GG	CC	AA	TT	insCCinsCC	GG	TC	CT	CC	TC	AA	CC	GG	AA	GG	GA	CC	TT	GG	AA	AA
29	Alentejana	CT	GG	GG	TT	AA	AA	GT	CC	AA	AA	TT	CC	GG	GG	CC	GA	TT	GG	GG	CC	GA	TT	insCCinsCC	GG	TC	TT	CC	TT	AA	CC	GG	AA	GG	GG	CC	TT	GG	AA	AA
30	Alentejana	TT	GA	GG	TT	AC	NA	GT	CC	AA	AA	TT	CC	GG	GG	CC	AA	TT	GG	GG	CC	GG	TT	insCCinsCC	GG	TC	CT	CC	TT	AA	CC	GG	TA	GG	GG	CC	TT	GG	AA	AA
31	Alentejana	CT	GG	GG	TT	AC	GG	TT	CT	AA	AA	TT	CC	GG	GG	CC	AA	TT	GG	GG	CC	AA	TT	insCCdel--	GG	TC	CT	CC	TT	AA	CC	GG	AA	GG	GA	CC	TT	GG	AA	AA
32	Alentejana	CC	GG	GG	TT	AC	AA	GT	CC	AA	NA	TT	CC	GG	GG	CC	AA	TT	GG	GG	CC	GA	TT	insCCinsCC	GG	TT	CC	CC	TT	AA	CC	GG	AA	GG	GA	CC	TT	GG	AA	AA
33	Alentejana	CC	GA	GG	TT	AC	AA	TT	CC	AA	AA	AT	CC	GG	GG	CC	AA	TT	GG	GG	CC	GA	TT	insCCinsCC	GG	TT	CT	CC	TT	AA	CC	GG	AA	GG	GA	CC	TT	GG	AA	AA
34	Alentejana	CT	GA	GG	TT	AA	AA	TT	CC	AA	AA	AA	CC	GG	GG	CC	GA	TT	GG	GG	CC	AA	TT	insCCinsCC	GG	TT	TT	CC	TC	AA	CC	GG	AA	GG	AA	CC	TT	GG	AA	AA
35	Alentejana	CT	AA	GG	TT	AC	GA	TT	CC	AA	GA	TT	CC	GT	GG	CC	AA	CT	GG	GG	CC	AA	TT	insCCinsCC	GG	TT	CT	CC	CC	AA	CC	GG	AA	GG	AA	CC	TT	GG	AA	AA
36	Alentejana	TT	GA	GG	TT	CC	AA	GT	CC	AA	GA	TT	CC	GG	GG	CC	AA	TT	GG	GG	CC	GA	TT	insCCinsCC	GG	TC	CT	CC	TT	NA	CC	GG	AA	GG	GA	CC	TT	GG	AA	AA
37	Alentejana	CC	GG	GG	TT	AA	AA	GG	CC	AA	NA	AT	CC	GG	GG	CC	AA	TT	GG	GG	CC	GA	TT	insCCinsCC	GG	TT	TT	CC	TT	AA	CC	GG	AA	GG	GA	CC	TT	GG	AA	AA
38	Alentejana	TT	AA	GG	TT	AC	NA	TT	CC	AA	NA	AT	CC	GG	GG	CC	GA	CT	GG	GG	CC	GA	TT	insCCdel--	GG	TC	CT	CC	TC	AA	CC	GG	AA	GG	GA	CC	TT	GG	AA	AA
39	Alentejana	TT	GA	GG	TT	AC	NA	TT	CC	AA	AA	TT	CC	GG	GG	CC	AA	TT	GG	GG	CC	GA	TT	insCCinsCC	GG	TT	CT	CC	TT	AA	CC	GG	AA	GG	AA	CC	TT	GG	AA	AA
40	Alentejana	CT	GG	GG	TT	AC	NA	GT	CC	AA	AA	TT	CC	GG	GG	CC	AA	TT	GG	GG	CC	AA	TT	insCCinsCC	GG	TC	CC	CC	TT	AA	CC	GG	AA	GG	AA	CC	TT	GG	AA	AA
41	Alentejana	CT	AA	GG	TT	AA	NA	GG	CC	AA	AA	AT	CC	GG	GG	CC	AA	TT	GG	GG	CC	AA	TT	insCCdel--	GG	TT	TT	CC	TT	AA	CC	GG	AA	GG	AA	CC	TT	GG	AA	AA
42	Alentejana	CC	AA	GG	TT	AA	AA	GT	CC	AA	AA	TT	CC	GG	GG	CC	AA	TT	GG	GG	CC	AA	TT	insCCinsCC	GG	TT	CT	CC	TC	AA	CC	GG	AA	GG	AA	CC	TT	GG	AA	AA
43	Alentejana	CT	AA	GG	TT	AA	NA	GG	CC	AA	GA	TT	TC	GG	GG	CC	GA	TT	GG	GG	CC	GA	TT	insCCinsCC	GG	CC	CC	CC	TT	AA	CC	GG	AA	GG	AA	CC	TT	GG	AA	AA
44	Alentejana	TT	GA	GG	TT	CC	AA	GG	CC	AA	AA	TT	TC	GG	GG	CC	AA	TT	GG	GG	CC	AA	TT	insCCinsCC	GG	TT	CC	CC	TC	AA	CC	GG	AA	GG	AA	CC	TT	GG	AA	AA
45	Alentejana	CC	GG	GG	TT	AA	AA	GG	CC	AA	AA	TT	CC	GG	GG	CC	AA	TT	GG	GG	CC	AA	TT	insCCinsCC	GG	TT	CT	CC	TC	AA	CC	GG	AA	GG	AA	CC	TT	GG	AA	AA
46	Alentejana	CC	GG	GG	TT	AC	AA	GG	CT	AA	GA	TT	CC	GG	GG	CC	GA	TT	GG	GG	CC	GA	TT	insCCinsCC	GG	TT	CT	CC	TC	AA	CC	GG	AA	GG	AA	CC	TT	GG	AA	AA
47	Alentejana	TT	GA	GG	GT	AA	NA	GT	CC	AA	GA	AA	CC	GG	GG	CC	AA	TT	GG	GG	CC	GA	TT	insCCinsCC	GG	TT	CT	CC	TT	NA	CC	GG	AA	GG	GA	CC	TT	GG	AA	AA
48	Alentejana	CC	AA	GG	TT	AC	NA	TT	CC	AA	AA	TT	TC	GG	GG	CC	AA	TT	GA	GG	CC	GA	TC	del--del--	GG	TT	TT	CC	TT	AA	CC	GG	AA	GG	GA	CC	TT	GG	AA	AA
49	Apulo Calabrese	CC	GG	GG	GG	AC	NA	GG	CC	AA	GA	TT	CC	GT	AG	CC	GG	CC	GG	GG	CC	AA	TT	del--del--	GA	CC	CC	CC	TT	AC	NA	GG	TT	GG	GA	CC	TT	GG	AA	AA
50	Apulo Calabrese	CT	GG	NA	GT	CC	GA	GG	CC	AA	GG	TT	CC	GT	AA	CC	GG	CC	GG	GG	CC	AA	TT	del--del--	GA	CC	CT	CC	TC	AC	CA	GG	TA	GG	AA	CC	TT	GG	AA	AA
51	Apulo Calabrese	TT	AA	GG	GG	AA	GG	GG	CC	AA	AA	TT	TC	GG	AA	CC	GA	CC	GG	GG	CC	AA	TT	del--del--	GG	CC	TT	CC	TT	AA	AA	GG	TT	GG	GA	TC	CC	GG	AA	AA
52	Apulo Calabrese	CT	AA	GG	GG	AC	GG	GG	CC	AA	GG	TT	CC	GG	AG	CC	GG	CC	GG	GG	CC	AA	TT	insCCdel--	GG	CC	CT	CC	TT	CC	CA	GG	TT	GG	AA	CC	TC	GG	AA	AA
53	Apulo Calabrese	CT	GG	GG	GG	CC	GA	GG	CC	AA	NA	TT	CC	GG	AA	CC	GG	CT	GG	GG	CC	AA	TT	del--del--	GA	CC	CC	CG	TC	CC	CC	GG	TA	GG	AA	CC	TT	GG	AA	AA
54	Apulo Calabrese	NA	NA	NA	NA	CC	AA	GG	CC	AA	NA	TT	NA	GT	AA	NA	GA	NA	GG	NA	NA	AA	NA	del--del--	GG	NA	TT	CC	TC	CC	CC	GG	TA	NA	NA	CC	TT	GG	AA	AA
55	Apulo Calabrese	CC	GA	GG	GT	CC	GG	GG	CC	AA	GA	AT	CC	GG	AA	CC	GA	CC	GG	GG	CC	AA	TT	insCCdel--	GG	CC	TT	CC	TT	NA	AA	GG	TT	GG	GG	CC	TC	GG	AA	AA
56	Apulo Calabrese	CC	GG	GG	GT	CC	GA	GG	CC	AA	NA	AA	CC	GG	AA	CC	GG	CC	GG	GG	CC	AA	TT	del--del--	GG	TC	TT	CG	TC	AA	AA	GG	TT	GG	AA	CC	TC	GG	AA	AA
57	Apulo Calabrese	CT	GG	GG	GG	CC	GG	GG	CC	AA	GG	AT	CC	GT	AA	CC	GG	CC	GG	GG	CC	AA	TT	del--del--	GG	CC	CT	CG	TC	CC	NA	GG	TA	GG	AA	CC	TT	GG	AA	AA
58	Apulo Calabrese	CC	GA	GG	GG	CC	GA	GG	CC	AA	NA	TT	CC	GT	AG	CC	GG	CC	GG	GG	CC	AA	TT	del--del--	GA	CC	CT	CG	TT	CC	CA	GG	TA	GG	GA	CC	TT	GG	AA	AA
59	Apulo Calabrese	TT	GG	GG	GG	CC	GG	GG	CC	AA	GA	TT	CC	GG	AA	CC	GG	CC	GG	GG	CC	AA	TT	del--del--	GG	CC	CC	CC	TT	CC	NA	GG	TA	GG	GA	CC	TC	GG	AA	AA
60	Apulo Calabrese	CT	AA	GG	GT	AA	GG	GG	CC	AA	GA	TT	CC	GG	AA	CC	GG	CC	GG	GG	CC	AA	TT	del--del--	GG	CC	TT	CC	TC	AA	AA	GG	TT	GG	AA	CC	CC	GG	AA	AA
61	Apulo Calabrese	CC	GG	GG	GT	AC	GA	GG	CC	AA	GA	TT	CC	GT	AA	CC	GG	CC	GG	GG	CC	AA	TT	del--del--	GA	CC	CC	CC	TT	AC	CC	GG	TT	GG	AA	CC	TT	GG	AA	AA
62	Apulo Calabrese	CC	GG	GG	GT	CC	AA	GG	CC	AA	GA	TT	CC	GT	AA	CC	GA	CC	GG	GG	CC	AA	TT	del--del--	GG	CC	CT	CC	TT	AC	CC	GG	TT	GG	AA	CC	TT	GG	AA	AA
63	Apulo Calabrese	CC	GG	GG	GT	AC	GA	GG	CC	AA	GA	TT	CC	GG	AG	CC	GG	CC	GG	GG	CC	AA	TT	del--del--	GA	CC	CC	CC	TT	AC	CC	GG	TT	GG	GA	CC	TT	GG	AA	AA
64	Apulo Calabrese	TT	GG	GG	GT	CC	GG	GG	CC	AA	NA	TT	CC	GG	AA	CC	GA	TT	GG	GG	CC	AA	TT	del--del--	AA	CC	CT	CC	TC	AC	NA	GG	TA	GG	GA	CC	TC	GG	AA	AA
65	Apulo Calabrese	CC	GG	GG	GT	CC	GA	GG	CC	AA	AA	TT	CC	GG	AA	CC	GA	TT	GG	GG	CC	AA	TT	del--del--	AA	TC	CT	CC	TT	AC	CC	GG	TA	GG	GA	CC	TT	GG	AA	NA
66	Apulo Calabrese	TT	GG	GG	GT	CC	GA	GG	CC	AA	GA	TT	CC	GG	AA	CC	GG	TT	GG	GG	CC	AA	TT	del--del--	GG	CC	TT	CC	TT	AA	CC	GG	TA	GG	GG	CC	TC	GG	AA	AA
67	Apulo Calabrese	CC	GG	GG	GT	CC	GA	GG	CC	AA	NA	TT	CC	GG	AA	CC	GA	TT	GG	GG	CC	AA	TT	del--del--	GA	TC	CT	CG	TT	AA	CC	GG	TA	GG	GG	CC	TT	GG	AA	AA
68	Apulo Calabrese	CC	GG	GG	NA	AA	GG	GG	CT	AA	NA	AT	NA	GG	AA	CC	GA	CC	GG	NA	NA	AA	TT	del--del--	GA	TC	TT	CG	NA	AC	CC	GG	TA	NA	GA	CC	TT	GG	AA	AA
69	Apulo Calabrese	TT	AA	GG	GG	CC	AA	GG	CC	AA	GA	TT	CC	GG	AA	CC	GA	TT	GG	GG	CC	AA	TT	del--del--	GA	CC	CC	CC	TT	AA	NA	GG	TA	GG	GA	CC	TT	GG	AA	AA
70	Apulo Calabrese	CT	GG	NA	GT	CC	GG	GG	CC	AA	GG	TT	CC	GG	AA	CC	GG	TT	GG	GG	CC	AA	TT	del--del--	GA	TC	CT	CG	TC	AA	NA	GG	TA	GG	GA	CC	TC	GG	AA	AA
71	Apulo Calabrese	CC	GG	GG	GT	CC	GA	GG	CC	AA	GA	TT	CC	GG	AA	CC	GA	TT	GG	GG	CC	AA	TT	del--del--	AA	CC	CC	CC	TC	AA	NA	GG	TA	GG	GA	CC	TT	GG	AA	AA
72	Apulo Calabrese	CT	AA	GG	GG	CC	AA	GG	CC	AA	GA	TT	CC	GG	AA	CC	GA	CT	GG	GG	CC	AA	TT	insCCdel--	GA	CC	CT	CG	TC	AA	NA	GG	TA	GG	GG	CC	NA	GG	AA	NA
73	Apulo Calabrese	CT	GG	GG	GT	CC	GG	GG	CC	AA	GA	TT	CC	GG	AA	CC	GG	TT	GG	GG	CC	AA	TT	del--del--	AA	CC	CT	GG	TC	AA	CC	GG	TA	GG	GG	CC	TT	GG	AA	AA
74	Apulo Calabrese	CT	AA	GG	TT	CC	GA	GG	CT	AA	GA	TT	CC	GG	AA	CC	AA	CC	GG	GG	CC	AA	TT	del--del--	GA	CC	CT	CC	TT	AC	AA	GG	AA	GG	GA	CC	TC	GG	AA	AA
75	Apulo Calabrese	CT	GA	GG	GT	CC	GG	GG	TT	AA	GA	TT	CC	GG	AA	CC	AA	CT	GG	GG	CC	AA	TT	del--del--	NA	CC	CC	CC	TT	AC	NA	GG	AA	GG	GG	CC	TT	GG	AA	AA
76	Apulo Calabrese	CT	AA	GG	TT	CC	GG	GG	CT	AA	NA	TT	CC	GG	AA	CC	GA	CC	GG	GG	NA	AA	TT	del--del--	GA	CC	CT	CC	TT	AC	NA	GG	TA	NA	GA	CC	TT	GG	AA	AA
77	Apulo Calabrese	CT	GA	GG	GT	CC	GG	GG	CT	AA	GA	TT	CC	GG	AA	CC	AA	CC	GG	GG	CC	AA	TT	del--del--	GA	CC	CC	CC	TC	AA	NA	GG	AA	GG	GG	CC	TC	GG	AA	AA
78	Apulo Calabrese	CC	GG	GG	GT	CC	GG	GG	CC	AA	NA	TT	CC	GG	AA	CC	NA	CT	GG	GG	CC	AA	TT	del--del--	GA	CC	CC	CC	TT	AC	NA	GG	AA	GG	GA	CC	TC	GG	AA	AA
79	Apulo Calabrese	NA	NA	NA	NA	CC	GG	GG	CT	AA	NA	TT	NA	GG	AA	NA	GG	NA	GG	NA	NA	AA	NA	del--del--	GG	NA	CT	CC	TT	AA	AA	GG	TA	NA	NA	CC	TC	GG	AA	AA
80	Apulo Calabrese	CC	GG	GG	TT	CC	GG	GG	CT	AA	NA	TT	CC	GG	AA	CC	GA	CT	GG	GG	CC	AA	TT	del--del--	GA	CC	CT	CC	TT	AA	AA	GG	TT	GG	GG	CC	TT	GG	AA	AA
81	Apulo Calabrese	CT	GA	NA	TT	CC	GG	GG	CT	AA	GG	TT	CC	GG	AA	CC	GA	CT	GG	GG	CC	AA	TT	del--del--	AA	CC	CT	CC	TT	AA	AA	GG	TA	GG	GA	CC	TT	GG	AA	AA
82	Apulo Calabrese	CC	AA	GG	GG	CC	GG	GG	CT	AA	GA	TT	CC	GG	AA	CC	AA	CC	GG	GG	CC	AA	TT	del--del--	GA	TC	CT	CC	TC	AA	AA	GG	TT	GG	GG	CC	TT	GG	AA	AA
83	Apulo Calabrese	CC	AA	GG	TT	CC	GA	GG	CT	AA	GA	TT	CC	GG	NA	CC	AA	CC	GG	GG	CC	AA	TT	del--del--	AA	CC	CT	CC	TT	AC	AA	GG	TA	GG	GA	CC	TC	GG	AA	AA
84	Apulo Calabrese	NA	NA	NA	NA	CC	GG	GG	CT	AA	NA	TT	NA	GG	AA	NA	GA	NA	GG	NA	NA	AA	NA	del--del--	AA	NA	CC	CC	NA	AA	AA	NA	TA	NA	NA	CC	TC	GG	AA	NA
85	Apulo Calabrese	CT	GG	GG	GG	CC	GG	GG	CC	AA	GA	TT	CC	GG	AA	CC	GA	NA	GG	GG	CC	AA	TT	del--del--	GA	TC	CC	CC	TC	AC	AA	GG	TT	GG	GG	CC	CC	GG	AA	AA
86	Apulo Calabrese	CC	GG	GG	TT	AC	GA	GT	CC	AA	NA	AT	TC	GG	AA	CT	GA	CC	GG	GG	CC	AA	TT	insCCdel--	GA	CC	CT	CC	TT	CC	AA	GG	TA	GG	AA	TC	TT	GG	AA	AA
87	Apulo Calabrese	CC	GG	GG	GT	AC	GA	GG	CC	AA	AA	AT	CC	GG	AG	CC	GG	CT	GG	GG	CC	AA	TT	del--del--	GA	TT	TT	CC	TC	AA	NA	NA	TT	GG	GA	CC	TT	TG	AA	AA
88	Apulo Calabrese	CT	GG	GG	TT	CC	GA	GG	CT	AA	GA	TT	CC	GG	GG	CC	GG	CC	GG	GG	CC	AA	TT	insCCdel--	GA	TC	TT	CC	TT	AA	AA	GG	TA	GG	GG	CC	TT	TG	AA	AA
89	Apulo Calabrese	NA	NA	NA	NA	AC	GA	GG	TT	AA	NA	TT	NA	GT	GG	NA	GA	NA	GG	NA	NA	AA	NA	del--del--	GG	NA	TT	CC	NA	AA	CC	GG	TA	NA	NA	CC	TC	GG	AA	AA
90	Apulo Calabrese	CT	GA	GG	GT	AC	GG	GG	CC	AA	AA	TT	TC	GG	AA	CC	GG	CT	GG	GG	CC	AA	TT	insCCdel--	AA	CC	TT	CC	TT	AC	NA	GG	TA	GG	AA	CC	TC	TG	AA	AA
91	Apulo Calabrese	CC	GG	GG	GG	AA	GA	GG	CC	AA	GA	AT	CC	GG	AG	CC	GG	CC	GG	GG	CC	AA	TT	insCCdel--	GA	TT	TT	CG	CC	AA	CC	GG	TA	GG	GA	CC	TT	GG	AA	AA
92	Apulo Calabrese	TT	GG	NA	TT	CC	AA	GG	CC	AA	GG	TT	CC	GG	GG	CC	GA	CC	GG	GG	CC	AA	TT	insCCdel--	GA	TT	CT	CC	TT	NA	AA	GG	TT	GG	AA	CC	TC	GG	AA	AA
93	Apulo Calabrese	TT	GG	GG	GT	CC	GA	GG	CT	AA	GA	AA	CC	GT	AG	CC	GA	CC	GG	GG	CC	AA	TT	insCCdel--	GG	TC	TT	CC	TT	NA	CC	GG	TT	GG	GA	CC	TT	GG	AA	AA
94	Apulo Calabrese	NA	NA	NA	NA	AC	GG	GG	CC	AA	NA	TT	NA	GT	NA	NA	GG	NA	GG	NA	NA	AA	NA	NA	GA	NA	TT	CG	TC	AA	CC	NA	TT	NA	NA	CC	CC	GG	AA	NA
95	Apulo Calabrese	CT	GG	GG	GT	AC	GA	GG	CC	AA	NA	AT	CC	GT	NA	CC	GA	CC	GG	GG	CC	AA	TT	del--del--	GG	TT	TT	CC	TT	AA	CC	GG	TA	GG	GA	CC	TT	TG	AA	AA
96	Basque	CT	GG	GG	GT	CC	AA	GG	CC	AA	GA	AA	CC	GG	GG	CC	AA	CC	GG	GG	CC	AA	TT	del--del--	GG	CC	TT	CC	TT	AA	CC	GG	TA	GG	GA	CC	TT	GG	AA	AA
97	Basque	CT	GG	GG	GT	AC	AA	GG	CC	AA	AA	AA	CC	GG	GG	CC	AA	CC	GG	GG	CC	AA	TT	del--del--	GG	TC	TT	CC	TT	AA	CC	GG	TT	GG	GG	CC	TT	GG	AA	AA
98	Basque	CC	GG	GG	GT	AC	AA	GG	CC	AA	GA	TT	CC	GG	GG	CC	AA	CC	GG	GG	CC	AA	TT	del--del--	GG	TT	TT	CC	TT	CC	CC	GG	TT	GG	GG	CC	TT	GG	AA	AA
99	Basque	CT	GG	GG	TT	CC	AA	TT	CC	AA	AA	AA	CC	GG	GG	CC	AA	CC	GG	GG	CC	AA	TT	del--del--	GG	TC	TT	CC	TT	CC	CC	GG	TA	GG	GA	CC	TT	GG	AA	AA
100	Basque	CC	GG	GG	TT	CC	GA	GT	CC	AA	GA	AA	CC	GG	GG	CC	GG	CC	GG	GG	CC	AA	NA	del--del--	GG	CC	TT	CC	TT	CC	CC	GG	TA	GG	GA	CC	TT	GG	AA	AA
101	Basque	TT	GG	GG	TT	AC	AA	GG	CC	AA	AA	AA	CC	GG	GG	CC	AA	CC	GG	GG	CC	AA	TT	del--del--	GG	TC	TT	CC	TT	AC	CC	GG	TT	GG	GG	CC	TT	GG	AA	AA
102	Basque	CT	GG	GG	GT	CC	NA	GG	CC	AA	GA	AT	CC	GG	GG	CC	GG	CC	GG	GG	CC	AA	TT	del--del--	GG	TT	TT	CC	TT	CC	CC	GG	TT	GG	GG	CC	TT	GG	AA	AA
103	Basque	CT	GG	GG	GT	CC	NA	GT	CC	AA	AA	AT	CC	GG	GG	CT	GA	CC	GG	GG	CC	AA	TT	del--del--	GG	TC	TT	CC	TT	CC	CC	GG	TA	GG	GG	CC	TC	GG	AA	AA
104	Basque	CC	GG	GG	TT	CC	NA	GG	CC	AA	GA	AA	CC	GG	GG	CT	AA	CC	GG	GG	CC	AA	TT	del--del--	GG	CC	CT	CC	TT	AA	CC	GG	AA	GG	GG	CC	TT	GG	AA	AA
105	Basque	CC	GG	GG	GT	CC	AA	GG	CC	AA	GA	AA	CC	GG	GG	CC	AA	CC	GG	GG	CC	AA	TT	del--del--	GG	TC	TT	CC	TT	AC	CC	GG	AA	GG	GG	CC	TT	GG	AA	AA
106	Basque	CC	GG	GG	TT	CC	NA	GG	CC	AA	GA	AA	CC	GG	GG	CC	AA	CC	GG	GG	CC	AA	TT	del--del--	GG	TT	TT	CC	TT	AC	CC	GG	TA	GG	GA	CC	TT	GG	AA	AA
107	Basque	CC	GG	GG	TT	AC	GG	GG	CC	AA	GA	AA	CC	GG	GG	CT	GA	CC	GG	GG	CC	AA	TT	del--del--	GG	TC	TT	CC	TT	AC	CC	GG	TA	GG	GG	CC	TT	GG	AA	AA
108	Basque	CC	GG	GG	TT	CC	GA	GG	CC	AA	AA	AA	CC	GG	GG	CC	GA	CC	GG	GG	CC	AA	TT	del--del--	GG	TC	TT	CC	TT	AC	CC	GG	TT	GG	GG	CC	TT	GG	AA	AA
109	Basque	CC	GG	GG	TT	CC	AA	GG	CC	AA	GA	AA	CC	GG	GG	CC	AA	CC	GG	GG	CC	AA	TT	del--del--	GG	TC	TT	CC	TT	AC	CC	GG	TT	GG	GG	CC	TT	GG	AA	AA
110	Basque	CC	GG	NA	GT	CC	AA	GG	CC	AA	GG	AA	CC	GG	GG	CC	AA	CC	GG	GG	CC	AA	TT	del--del--	GG	TC	TT	CC	TT	AA	CC	GG	TA	GG	GA	CC	TT	GG	AA	AA
111	Basque	CT	GG	GG	GG	CC	NA	GG	CC	AA	AA	AT	CC	GG	GG	CC	AA	CC	GG	GG	CC	AA	TT	insCCdel--	GG	CC	TT	CC	TT	AC	CC	GG	TA	GG	GG	CC	TT	GG	AA	AA
112	Basque	CC	GG	GG	GT	CC	AA	GG	CC	AA	GA	AA	CC	GG	GG	CC	GA	CC	GG	GG	CC	AA	TT	del--del--	GG	TC	TT	CC	TT	AA	CC	GG	TA	GG	GA	CC	TT	GG	AA	AA
113	Basque	CT	GG	GG	GT	CC	GG	GG	CC	AA	AA	AA	CC	GG	GG	CT	AA	CC	GG	GG	CC	AA	TT	del--del--	GG	TC	TT	CC	TT	AC	CC	GG	TT	GG	GA	CC	TT	GG	AA	AA
114	Basque	CT	GG	GG	TT	CC	NA	GG	CC	AA	AA	AT	CC	GG	GG	CC	AA	CC	GG	GG	CC	AA	TT	del--del--	GG	TT	TT	CC	TT	AC	CC	GG	TT	GG	GG	CC	TT	GG	AA	AA
115	Basque	CC	GG	GG	TT	CC	AA	GG	CC	AA	AA	AA	CC	GG	GG	CC	AA	CC	GG	GG	CC	AA	TT	del--del--	GG	TC	TT	CC	TT	AC	CC	GG	TA	GG	GG	CC	TT	GG	AA	AA
116	Basque	CT	GG	GG	GG	CC	GA	GG	CC	AA	GA	AA	CC	GG	GG	CC	GA	CC	GG	GG	CC	AA	TT	del--del--	GG	TT	TT	CC	TT	AC	CC	GG	TT	GG	GA	CC	TT	GG	AA	AA
117	Basque	CT	GG	GG	TT	AC	GA	GT	CC	AA	GA	AA	CC	GG	GG	CC	GA	CC	GG	GG	CC	AA	TT	del--del--	GG	TC	TT	CC	TT	CC	CC	GG	TA	GG	GG	CC	TT	GG	AA	NA
118	Basque	CT	GG	GG	TT	CC	AA	GG	CC	AA	GA	AA	CC	GG	GG	CC	AA	CC	GG	GG	CC	AA	TT	del--del--	GG	CC	TT	CG	TT	AA	CC	GG	TT	GG	GG	CC	TT	GG	AA	AA
119	Basque	CT	GG	GG	GT	CC	GG	GG	CC	AA	GA	AA	CC	GG	GG	CC	GA	CC	GG	GG	CC	AA	TT	del--del--	GG	TC	TT	CC	TT	AC	CC	GG	TT	GG	GG	CC	TT	GG	AA	AA
120	Basque	NA	NA	NA	NA	CC	NA	GG	CC	AA	NA	NA	NA	NA	NA	NA	NA	NA	NA	NA	NA	NA	NA	NA	NA	NA	NA	NA	TT	NA	NA	NA	NA	NA	NA	CC	NA	NA	NA	NA
121	Basque	CT	GA	GG	GT	CC	AA	GG	CC	AA	NA	AA	CC	GG	GG	CC	GA	CC	GG	GG	CC	AA	TT	del--del--	GG	TC	TT	CG	TT	AA	CC	GG	TA	GG	AA	CC	TT	GG	AA	AA
122	Basque	CT	GG	GG	TT	CC	NA	GT	CC	AA	GA	AA	CC	GG	GG	CC	GA	CC	GG	GG	CC	AA	TT	del--del--	GG	CC	TT	CC	TT	AA	CC	GG	TT	GG	GA	CC	TT	GG	AA	AA
123	Basque	CC	GG	GG	TT	CC	GA	GG	CC	AA	GA	AT	CC	GG	GG	CT	GA	CC	GG	GG	CC	AA	TT	del--del--	GG	CC	TT	CC	TT	AA	CC	GG	AA	GG	GG	CC	TT	GG	AA	AA
124	Basque	CC	GG	GG	GG	AC	NA	GT	CC	AA	GA	AA	CC	GG	GG	CC	GA	CC	GG	GG	CC	AA	TT	del--del--	GG	TC	TT	CC	TT	AC	CC	GG	TT	GG	GA	CC	TT	GG	AA	AA
125	Basque	CT	GG	GG	TT	CC	GG	GG	CC	AA	AA	AA	CC	GG	GG	CT	GA	CC	GG	GG	CC	AA	TT	del--del--	GG	TC	TT	CG	TT	AC	CC	GG	TA	GG	GA	CC	TT	GG	AA	AA
126	Basque	CC	GG	GG	GT	CC	GG	GG	CC	AA	AA	AA	CC	GG	GG	CC	AA	CC	GG	GG	CC	AA	TT	del--del--	GG	CC	TT	CC	TT	AA	CC	GG	TA	GG	GA	CC	TT	GG	AA	AA
127	Basque	CC	GG	GG	GT	CC	AA	GG	CC	AA	GA	AA	CC	GG	GG	CC	AA	CC	GG	GG	CC	AA	TT	del--del--	GG	TT	TT	CC	TT	AC	CC	GG	TA	GG	GA	CC	TT	GG	AA	AA
128	Basque	CC	GG	GG	GT	CC	GA	GT	CC	AA	GA	AT	CC	NA	NA	CC	GA	CC	GG	GG	CC	AA	TT	del--del--	GG	CC	CT	CC	TT	AC	CC	GG	TT	GG	GG	CC	TT	GG	AA	AA
129	Basque	CC	GG	GA	NA	CC	AA	GG	CC	AA	NA	AA	CC	GG	GG	CC	AA	CC	GG	GG	CC	AA	TT	del--del--	GG	CC	TT	CC	TT	CC	CC	GG	TT	GG	GA	CC	TT	GG	AA	AA
130	Basque	CC	GG	GG	TT	CC	GG	GT	CC	AA	GA	AA	CC	GG	GG	CC	GA	CC	GG	GG	CC	AA	TT	del--del--	GG	TC	TT	CC	TT	AC	CC	GG	TT	GG	GA	CC	TT	GG	AA	AA
131	Basque	CC	GG	GG	TT	AA	NA	GG	CC	AA	AA	AT	CC	GG	GG	CC	GA	CC	GG	GG	CC	AA	TT	del--del--	GG	TC	TT	CG	TT	AA	CC	GG	TA	GG	GA	CC	TT	GG	AA	AA
132	Basque	CC	GG	GG	TT	AC	AA	GG	CC	AA	GA	AA	CC	GG	GG	CT	AA	CC	GG	GG	CC	AA	TT	del--del--	GG	TC	TT	CC	TT	AC	CC	GG	TA	GG	GG	CC	TT	GG	AA	AA
133	Basque	CC	GG	GG	GT	CC	NA	GG	CC	AA	GA	AT	TC	GG	GG	CT	AA	CC	GG	GG	CC	AA	TT	del--del--	GG	TC	TT	CG	TT	CC	CC	GG	TA	GG	GA	CC	TT	GG	AA	AA
134	Basque	CC	GG	GA	GT	AC	GA	GG	CC	AA	AA	AT	CC	GG	GG	CC	GA	CC	GA	GG	CC	GA	TC	del--del--	GG	CC	TT	CC	TT	CC	CC	GG	AA	GG	GA	CC	TT	GG	AA	AA
135	Basque	CT	GG	GG	GT	AC	AA	GG	CC	AA	GA	AA	CC	GG	GG	CT	GA	CC	GG	GG	CC	AA	TT	del--del--	GG	TC	CT	CC	TT	AC	CC	GG	TA	GG	GG	CC	TC	GG	AA	AA
136	Basque	CC	GG	GG	GT	CC	GG	GG	CC	AA	GA	AA	CC	GG	GG	NA	AA	NA	GG	GG	CC	AA	TT	del--del--	GG	TC	CT	CC	TT	AC	CC	GG	TT	GG	GA	CC	TT	GG	AA	AA
137	Basque	CC	GG	GG	GT	CC	GG	GG	CC	AA	NA	AT	CC	GG	GG	CT	GG	CC	GG	GG	CC	AA	TT	del--del--	GG	CC	TT	CC	TT	CC	CC	GG	TT	GG	GA	CC	TC	GG	AA	AA
138	Basque	CC	GG	GG	GG	CC	AA	GG	CC	AA	GA	AT	TT	GG	GG	CC	AA	CC	GG	GG	CC	AA	TT	del--del--	GG	CC	TT	CG	TT	CC	CC	GG	TT	GG	AA	CC	TT	GG	AA	AA
139	Basque	CC	GG	GG	TT	CC	AA	GG	CC	AA	GA	AA	CC	GG	GG	CT	AA	CC	GG	GG	CC	AA	TT	del--del--	GG	CC	TT	CG	TT	AA	CC	GG	TA	GG	GA	CC	TT	GG	AA	AA
140	Basque	CC	GG	GG	GT	CC	AA	GG	CC	AA	AA	AA	TC	GG	GG	CC	GA	CC	GG	GG	CC	AA	TT	del--del--	GG	TC	CC	CC	TT	AC	CC	GG	TT	GG	GA	CC	TT	GG	AA	AA
141	Basque	CC	GG	GG	TT	CC	GA	GG	CC	AA	AA	AA	CC	GG	GG	CC	GA	CC	GG	GG	CC	AA	TT	del--del--	GG	CC	CT	CC	TT	AC	CC	GG	TA	GG	GA	CC	TT	GG	AA	AA
142	Basque	CC	GG	GG	TT	AC	AA	GG	CC	AA	GA	AA	CC	GG	GG	CC	AA	CC	GG	GG	CC	AA	TT	del--del--	GG	TC	TT	CG	TT	CC	CC	GG	TA	GG	GG	CC	TT	GG	AA	AA
143	Basque	CC	GG	GG	GT	CC	GG	GG	CC	AA	GA	TT	CC	GG	GG	CC	AA	CC	GG	GG	CC	AA	TT	del--del--	GG	CC	TT	CC	TT	AC	CC	GG	TT	GG	GG	CC	TT	GG	AA	AA
144	Bisara	CC	GG	GG	GG	AC	NA	GT	CC	AA	GA	TT	TT	GG	GG	CC	GG	CT	GG	GG	CC	AA	TT	del--del--	GG	TT	CT	GG	TT	AC	CC	GG	TA	GG	AA	TC	CC	GG	AA	AA
145	Bisara	CT	GG	GG	TT	CC	NA	GT	CC	AA	GA	AT	TT	TT	GG	CC	GG	CC	GG	GG	CC	AA	TT	del--del--	GG	TT	TT	CG	TT	AA	CC	GG	AA	GG	GA	CC	TT	GG	AA	AA
146	Bisara	CT	GG	GG	TT	CC	GG	GT	TT	AA	GA	TT	TC	TT	GG	CC	GG	CC	GG	GG	CC	AA	TT	del--del--	GG	TT	TT	CG	TT	AC	CC	GA	AA	GG	GA	CC	TT	TG	AA	AA
147	Bisara	CT	GA	GG	GT	AC	GA	GG	CT	AA	GA	TT	TC	GG	GG	CC	GG	CC	GG	GG	CC	AA	TT	del--del--	GG	TC	TT	CC	TT	AC	CA	GG	AA	GG	GG	CC	TC	TG	AA	AA
148	Bisara	TT	GA	GG	TT	AA	NA	GG	TT	AA	NA	AT	TC	GG	GG	CC	GA	CC	GG	GG	CC	AA	TT	del--del--	GG	TT	TT	CG	TT	AC	CC	GG	TA	GG	AA	TC	TT	GG	AA	AA
149	Bisara	TT	GG	GA	TT	AA	AA	GT	CC	AA	GA	AT	CC	GT	AG	CC	GG	CT	GG	GG	CC	AA	TT	del--del--	GG	TC	TT	CC	TT	AA	CC	GG	AA	GG	GA	CC	TC	GG	AA	AA
150	Bisara	TT	GA	GA	TT	CC	GG	GG	CC	AA	AA	AT	TC	GG	GG	CC	GG	CC	GG	GG	CC	AA	TT	insCCdel--	GA	TC	TT	CG	TT	AC	CC	GG	TA	GG	GA	CC	TC	TG	AA	AA
151	Bisara	TT	GG	GA	TT	AC	GG	GG	CC	AA	GA	AT	TC	GG	GG	CC	GG	CC	GG	GG	CC	AA	TT	insCCdel--	GA	TC	TT	CG	TT	AC	CC	GG	TA	GG	GA	CC	TC	TG	AA	AA
152	Bisara	TT	GA	GG	TT	CC	AA	GG	CT	AA	GA	AA	TC	GG	GG	CC	GG	CC	GG	GG	CC	AA	TT	del--del--	GA	TC	TT	CG	TT	AC	CC	GG	AA	GG	AA	CC	TT	TG	AA	AA
153	Bisara	CC	GG	AA	GT	AA	NA	GT	CT	AA	GA	AA	CC	GG	GG	CC	GG	CC	GG	GG	CC	AA	TT	del--del--	GG	TC	TT	CG	TT	AC	CC	GG	TT	GG	AA	CC	CC	GG	AA	AA
154	Bisara	CT	GG	GG	TT	AC	GG	TT	TT	AA	GA	AA	TT	GG	GG	CC	GG	CT	GG	GG	CC	AA	TT	del--del--	GG	TC	TT	GG	TT	CC	CC	GG	TA	GG	GA	CC	TC	GG	AA	AA
155	Bisara	CC	GG	GG	TT	AA	GG	GG	CT	AA	GG	TT	TC	GT	GG	CC	GG	CC	GG	GG	CC	AA	TT	insCCdel--	GG	TC	CT	CG	TT	AA	CC	AA	AA	GG	GA	CC	TC	TG	AA	AA
156	Bisara	CT	GG	GG	TT	CC	NA	GT	CC	AA	NA	AT	TC	GT	GG	CC	AA	CC	GG	GG	CC	AA	TT	insCCdel--	GG	TT	NA	CC	TT	CC	CC	GA	AA	GG	AA	CC	TC	GG	AA	AA
157	Bisara	CC	GG	GG	GG	AC	GG	GT	CT	AA	AA	AT	CC	GG	GG	CC	GG	CT	GG	GG	CC	AA	TT	insCCdel--	GG	TT	CT	CG	TT	AA	CC	GG	AA	GG	GA	CC	TT	TG	AA	AA
158	Bisara	CC	GA	GG	GG	AC	GG	GG	CC	AA	GA	AA	TC	GG	GG	CC	GG	CC	GG	GG	CC	AA	TT	insCCdel--	GG	TT	CC	GG	TT	AA	NA	GA	AA	GG	AA	CC	TT	GG	AA	AA
159	Bisara	CT	GG	GG	TT	CC	AA	GG	CT	AA	GA	AT	CC	GG	GG	CC	GG	CT	GG	GG	CC	AA	TT	insCCdel--	GG	TC	CT	CG	TT	AC	CC	GG	AA	GG	GG	CC	TT	GG	AA	AA
160	Bisara	CT	GA	GG	TT	AC	GG	GG	CT	AA	GA	AT	CC	GT	GG	CC	GG	CT	GG	GG	CC	AA	TT	insCCdel--	GG	TC	CC	CC	TT	CC	CC	GA	AA	GG	GA	CC	TT	TG	AA	AA
161	Bisara	CT	GG	GG	GT	AC	GG	GG	CT	AA	GA	TT	TC	GG	GG	CC	GG	CT	GG	GG	CC	AA	TT	del--del--	GG	TT	TT	GG	TT	AC	CC	GG	TT	GG	GA	CC	TC	GG	AA	AA
162	Bisara	TT	GG	GA	TT	CC	GA	GG	CT	AA	NA	TT	CC	GG	GG	CC	GA	CC	GG	GG	CC	AA	TT	del--del--	GG	TT	TT	CC	TT	CC	NA	GA	AA	GG	GA	CC	CC	GG	AA	AA
163	Bisara	CT	GG	AA	TT	CC	GA	GG	CT	AA	GA	TT	TC	GG	GG	CC	GG	CC	GG	GG	CC	AA	TT	del--del--	GG	TT	TT	CG	TT	CC	CC	GA	TA	GG	AA	CC	TC	GG	AA	AA
164	Bisara	CT	GG	GG	TT	AC	NA	GT	CC	AA	NA	TT	CC	GT	GG	CC	GG	CC	GG	GG	CC	AA	TT	insCCdel--	GG	TT	CT	CC	TT	AA	CC	GG	AA	GG	GA	CC	TT	GG	AA	AA
165	Bisara	CT	GA	GG	TT	AA	GA	GT	TT	AA	GG	TT	TC	GG	GG	CC	GG	CC	GG	GG	CC	AA	TT	del--del--	GG	TT	CT	GG	TT	AC	NA	GG	AA	GG	GG	TC	TT	TG	AA	AA
166	Bisara	TT	GA	GG	GT	CC	NA	GG	CT	AA	GA	TT	CC	GT	GG	CC	GG	CC	GG	GA	CT	GA	TT	del--del--	GG	TT	TT	CG	TT	AC	AA	GA	TA	GG	GA	CC	TC	GG	AA	AA
167	Bisara	CC	AA	GG	TT	CC	GA	GG	CT	AA	AA	AA	TT	GT	GG	CC	GG	CC	GG	GG	CC	AA	TT	del--del--	GG	TT	TT	CG	TT	CC	NA	GG	TT	GG	AA	TC	TT	GG	AA	AA
168	Bisara	CC	GG	GG	TT	AA	NA	GG	CC	AA	AA	AA	CC	GG	GG	CC	GG	CT	GG	GG	CC	AA	TT	del--del--	GA	CC	TT	CC	TT	AC	CC	GA	AA	GG	GA	CC	TT	GG	AA	AA
169	Bisara	CT	GG	GG	GT	AC	GA	GT	CT	AA	NA	AA	CC	GG	GG	CC	GG	CC	GG	GG	CC	AA	TT	insCCdel--	GG	TT	TT	CC	TT	AC	CA	GA	TA	GG	GA	CC	TC	GG	AA	AA
170	Bisara	CT	GG	GG	GG	AA	NA	GG	TT	AA	NA	AA	CC	GG	GG	CC	GG	CT	GG	GG	CC	AA	TT	del--del--	GA	TC	TT	CC	TT	AA	CC	GG	TA	GG	GG	CC	TT	GG	AA	AA
171	Bisara	CC	GG	GG	GT	AC	GG	GG	TT	AA	GA	AA	CC	GG	GG	CC	GG	CT	GG	GG	CC	AA	TT	del--del--	GG	TC	TT	CG	TT	CC	CC	GA	TT	GG	AA	CC	TT	GG	AA	AA
172	Bisara	CC	GG	GG	GT	AA	NA	GG	CT	AA	GA	AA	CC	GG	GG	CC	GG	CT	GG	GG	CC	AA	TT	del--del--	GG	CC	TT	CC	TT	CC	CC	GA	TA	GG	GA	CC	TT	GG	AA	AA
173	Bisara	CC	GG	GG	GT	AA	GG	GG	TT	AA	GA	AT	CC	GG	GG	CC	GG	CC	GG	GG	CC	AA	TT	del--del--	GA	TT	CT	CC	TT	AA	CA	NA	TA	GG	GA	CC	TC	GG	AA	AA
174	Bisara	CT	GG	GG	GG	CC	GG	GT	CC	AA	NA	AT	TC	GG	GG	CC	GA	CC	GG	GG	CC	AA	TT	del--del--	GG	TT	CT	GG	TT	AA	CC	GG	AA	GG	GA	CC	TC	GG	AA	AA
175	Bisara	CT	GG	GG	GG	CC	NA	NA	CC	AA	NA	TT	TC	GG	GG	CC	NA	CT	GG	GG	CC	AA	TT	insCCdel--	GG	TT	CT	CG	TT	AA	CC	GG	TA	GG	GG	CC	TC	GG	AA	AA
176	Bisara	CC	GG	GG	TT	AC	NA	GT	CT	AA	NA	AT	TT	GG	GG	CC	GG	TT	GG	GG	CC	AA	TT	del--del--	GG	TT	TT	CC	TT	AC	CC	GG	TA	GG	GA	CC	TC	GG	AA	AA
177	Bisara	CT	AA	GA	TT	AA	NA	GG	CT	AA	NA	AA	TT	GT	GG	CC	GG	CC	GG	GG	CC	AA	TT	del--del--	GG	TT	TT	CG	TT	AA	NA	GG	TT	GG	AA	CC	TC	GG	AA	AA
178	Bisara	CT	GG	GG	TT	AA	GA	GG	CT	AA	GA	AA	TT	GT	GG	CC	GG	CT	GG	GG	CC	AA	TT	del--del--	GG	TT	TT	CG	TT	AA	CC	GG	TT	GG	GA	CC	TC	GG	AA	AA
179	Bisara	CC	GG	GG	GT	AC	GA	GT	CT	AA	NA	AT	TC	GT	GG	CC	GG	CC	GG	GG	CC	AA	TT	del--del--	GG	TT	TT	CC	TT	CC	CC	GG	TA	GG	AA	CC	TC	GG	AA	AA
180	Bisara	CC	GG	GA	TT	AA	AA	GT	CT	AA	AA	AA	TC	GT	GG	CC	GG	CC	GG	GG	CC	AA	TT	del--del--	GG	TC	TT	CG	TT	AC	CC	GA	TA	GG	AA	CC	TC	GG	AA	AA
181	Bisara	CC	GG	GG	GT	AC	GA	GG	CT	AA	NA	AT	TT	GT	GG	CC	GG	CT	GG	GG	CC	AA	TT	del--del--	GG	TT	TT	CC	TT	AC	CC	GG	TA	GG	AA	CC	TC	GG	AA	AA
182	Bisara	CC	GG	GG	GT	AC	NA	GT	TT	AA	GA	AT	TT	GG	GG	CC	GG	CC	GG	GG	CC	AA	TT	del--del--	GG	TT	TT	CG	TT	AA	NA	GG	TA	GG	AA	CC	TC	GG	AA	AA
183	Bisara	CC	GG	GG	TT	CC	GA	TT	CT	AA	AA	TT	TT	GT	GG	CC	GG	TT	GG	GG	CC	AA	TT	del--del--	GG	TT	TT	CC	TT	CC	CC	GG	TA	GG	GA	CC	TC	TG	AA	AA
184	Bisara	CT	GG	GG	TT	AA	NA	TT	CT	AA	GA	AT	TT	GG	GG	CC	GG	CT	GG	GG	CC	AA	TT	del--del--	GG	TT	TT	CG	TT	AC	CC	GG	TA	GG	AA	CC	TT	TG	AA	AA
185	Bisara	CT	GA	GG	TT	AA	NA	GT	CC	AA	GA	AT	CC	GT	GG	CC	GA	CC	GG	GG	CC	AA	TT	del--del--	GG	TT	TT	CG	TT	CC	CC	GA	TA	GG	GG	CC	TT	GG	AA	AA
186	Bisara	CC	GG	GG	TT	AA	GA	GT	CT	AA	GA	AA	TT	GT	GG	CC	GG	TT	NA	GG	CC	AA	TT	del--del--	GG	TT	TT	CG	TT	AC	CC	GG	TT	GG	GA	CC	TC	GG	AA	AA
187	Bisara	CC	GG	GG	TT	AA	NA	TT	CT	AA	GG	AT	TC	GT	GG	CC	GG	CT	GG	GG	CC	AA	TT	del--del--	GG	TT	TT	CG	TT	CC	NA	GA	TA	GG	GA	CC	TT	GG	AA	AA
188	Bisara	CT	GG	GG	TT	CC	GG	GG	CT	AA	GA	AT	CC	GG	GG	CC	GG	CT	GG	GG	CC	AA	TT	insCCdel--	GG	TC	TT	CC	TT	AA	CC	GG	AA	GG	GA	CC	CC	GG	AA	AA
189	Bisara	CC	GG	GG	GT	AA	NA	GG	CC	AA	GA	TT	CC	GT	GG	CC	GG	CC	GG	GG	CC	AA	TT	del--del--	GG	TT	TT	CC	TT	AC	NA	GG	TA	GG	AA	CC	TC	TG	AA	AA
190	Bisaro	CC	GG	GG	TT	CC	NA	GG	CT	AA	NA	AT	TT	GG	GG	CC	GG	CT	GG	GG	CC	AA	TT	del--del--	GG	TT	TT	CG	TT	CC	CC	GG	AA	GG	GG	CC	TC	GG	AA	AA
191	Bisaro	CT	GG	GG	GT	AC	GG	GG	CC	AA	NA	TT	TT	GG	GG	CC	GG	CT	GG	GG	CC	AA	TT	del--del--	GG	TT	CT	GG	TT	AA	CC	GG	TT	GG	GA	TC	TC	GG	AA	AA
192	Black Slavonian	CC	AA	GA	TT	NA	NA	NA	NA	NA	NA	NA	TT	NA	NA	CC	NA	CT	NA	GG	CC	NA	TC	NA	NA	CC	NA	NA	NA	NA	NA	NA	NA	GG	GG	CC	NA	NA	NA	NA
193	Black Slavonian	CT	AA	GA	GG	NA	NA	NA	NA	NA	GG	NA	TC	NA	NA	CC	NA	CT	NA	NA	CC	NA	CC	NA	NA	TC	NA	NA	NA	NA	NA	NA	NA	GG	GG	CC	NA	NA	NA	NA
194	Black Slavonian	CC	AA	NA	GG	NA	NA	NA	NA	NA	NA	NA	TT	NA	NA	CC	NA	NA	NA	NA	CC	NA	CC	NA	NA	CC	NA	NA	NA	NA	NA	NA	NA	GG	GG	CC	NA	NA	NA	NA
195	Black Slavonian	CC	AA	GG	GT	AA	AA	GG	CC	AA	NA	TT	TC	GG	GG	CC	GG	CC	AA	NA	CC	GG	CC	del--del--	GA	CC	TT	CC	TT	AA	CC	GG	TA	GG	GG	CC	TT	GG	AA	AA
196	Black Slavonian	CC	AA	GA	GG	NA	NA	NA	NA	NA	GA	NA	TT	NA	NA	CC	NA	CC	NA	NA	CC	NA	CC	NA	NA	CC	NA	NA	NA	NA	NA	NA	NA	GG	GA	CC	NA	NA	NA	NA
197	Black Slavonian	CT	AA	GA	TT	AC	GG	GG	CC	AA	NA	AT	TC	GT	GG	CC	GA	CC	AA	NA	CC	GG	CC	del--del--	GG	TC	CT	CC	TC	CC	CC	GG	TT	GG	GG	CC	TT	TG	AA	AA
198	Black Slavonian	CC	AA	GG	TT	AC	GA	GG	CC	AA	GA	TT	CC	GT	GG	CC	GG	CT	AA	NA	CC	GG	CC	del--del--	GG	CC	CT	CC	TT	CC	CC	GG	TA	NA	GG	CC	CC	TG	AA	AA
199	Black Slavonian	CT	AA	GA	GG	CC	GG	GG	CC	AA	NA	TT	NA	NA	GG	CC	GA	NA	GA	GG	CC	GA	NA	insCCdel--	GG	TC	TT	CC	TT	CC	NA	GA	TA	NA	GG	CC	TC	TG	AA	AA
200	Black Slavonian	CT	AA	GA	GG	NA	NA	NA	NA	NA	GA	NA	TC	NA	NA	CC	NA	CT	NA	NA	CC	NA	CC	NA	NA	CC	NA	NA	NA	NA	NA	NA	NA	GG	GG	CC	NA	NA	NA	NA
201	Black Slavonian	NA	NA	NA	NA	NA	NA	NA	NA	NA	NA	NA	NA	NA	NA	NA	NA	NA	NA	NA	NA	NA	NA	NA	NA	NA	NA	NA	NA	NA	NA	NA	NA	NA	NA	NA	NA	NA	NA	NA
202	Black Slavonian	CT	AA	GA	TT	CC	AA	GG	CC	AA	GA	AT	TC	GG	GG	CC	GA	TT	AA	NA	CC	GG	CC	del--del--	GG	CC	CT	CC	TT	AA	CC	GG	TA	GG	GG	CC	TT	GG	AA	AA
203	Black Slavonian	CC	AA	GG	GG	AC	GG	GG	CC	AA	GA	TT	TC	GG	GG	CC	AA	TT	AA	NA	CC	GG	NA	del--del--	GG	TC	CT	CC	TT	AC	CC	GA	TT	GG	GG	CC	CC	GG	AA	AA
204	Black Slavonian	CT	GA	AA	GT	NA	NA	NA	NA	NA	GA	NA	TC	NA	NA	CC	NA	TT	NA	NA	CC	NA	CC	NA	NA	CC	NA	NA	NA	NA	NA	NA	NA	GG	GG	CC	NA	NA	NA	NA
205	Black Slavonian	CC	GA	GA	GT	AC	GA	GG	CC	AA	AA	AT	CC	GG	GG	CC	GA	TT	AA	NA	CC	GG	CC	del--del--	GG	CC	CT	CC	TT	AC	CC	GG	TA	GG	GG	CC	TC	TG	AA	AA
206	Black Slavonian	CC	GA	NA	TT	AC	NA	GG	CC	AA	NA	AT	CC	GG	GG	CC	GA	TT	AA	NA	CC	GG	CC	del--del--	GG	CC	TT	CC	TT	AC	CC	GG	TA	GG	GG	CC	TT	GG	AA	AA
207	Black Slavonian	CC	AA	GG	TT	AC	GA	GG	CC	AA	NA	AT	CC	GG	AG	CC	GG	CT	GA	GG	CC	GA	NA	insCCdel--	GG	TC	CT	CG	TT	AC	CC	GG	AA	GG	GG	CC	TC	GG	AA	AA
208	Black Slavonian	CT	NA	NA	GG	CC	GG	GG	CC	AA	AA	TT	CC	GG	GG	CC	GA	NA	AA	NA	CC	GG	CC	del--del--	GG	CC	CC	CG	TT	CC	CC	GA	TA	GG	GG	CC	TT	GG	AA	AA
209	Black Slavonian	CC	AA	GA	GT	NA	NA	NA	NA	NA	NA	NA	TC	NA	NA	CC	NA	TT	NA	NA	CC	NA	CC	NA	NA	CC	NA	NA	NA	NA	NA	NA	NA	GG	GG	CC	NA	NA	NA	NA
210	Black Slavonian	CC	AA	GA	GT	CC	GA	GG	CC	AA	NA	TT	TC	GG	GG	CC	GA	CT	AA	NA	CC	GG	CC	del--del--	GG	TC	CT	CC	TT	AC	CC	GG	TA	GG	GA	CC	TC	TG	AA	AA
211	Black Slavonian	TT	AA	NA	GG	NA	NA	NA	NA	NA	NA	NA	CC	NA	NA	CC	NA	CT	NA	GG	CC	NA	TT	NA	NA	TC	NA	NA	NA	NA	NA	NA	NA	GG	GA	CC	NA	NA	NA	NA
212	Black Slavonian	CC	GA	GG	GG	AC	GA	GT	CC	AA	NA	TT	CC	GG	AG	CC	GA	CT	GG	GG	CC	AA	TT	insCCdel--	GG	TC	CT	CC	TT	AC	CC	GA	TT	GG	GA	CC	TC	GG	AA	AA
213	Black Slavonian	CC	AA	GG	GG	NA	NA	NA	NA	NA	GA	NA	CC	NA	NA	CC	NA	CT	NA	NA	CC	NA	CC	NA	NA	CC	NA	NA	NA	NA	NA	NA	NA	GG	GG	CC	NA	NA	NA	NA
214	Black Slavonian	CT	GA	GA	GG	AC	GA	GG	CC	AA	GA	TT	CC	GG	AG	CC	GA	CT	AA	NA	CC	GG	CC	del--del--	GG	TC	CC	CG	TT	AC	CC	GG	TT	GG	GA	CC	TC	TG	AA	AA
215	Black Slavonian	CT	AA	NA	TT	NA	NA	NA	NA	NA	NA	NA	TC	NA	NA	CT	NA	CC	NA	NA	CC	NA	CC	NA	NA	CC	NA	NA	NA	NA	NA	NA	NA	GG	GA	CC	NA	NA	NA	NA
216	Black Slavonian	CT	AA	NA	GG	NA	NA	NA	NA	NA	NA	NA	TT	NA	NA	CC	NA	CC	NA	AA	CT	NA	TC	NA	NA	CC	NA	NA	NA	NA	NA	NA	NA	GG	GG	CC	NA	NA	NA	NA
217	Black Slavonian	TT	AA	NA	GT	AC	GA	GT	CC	AA	NA	AT	TC	GG	GG	CC	GA	CT	AA	NA	CC	GG	CC	del--del--	GG	CC	CC	CG	TT	AC	CC	GG	TT	GG	AA	CC	CC	GG	AA	AA
218	Black Slavonian	CC	AA	AA	GT	AA	GA	GG	CC	AA	NA	TT	TC	GG	NA	CC	GG	CC	AA	NA	CC	GG	NA	del--del--	GG	CC	CT	CG	TT	AA	CC	GG	TT	GG	GA	CC	TC	GG	AA	AA
219	Black Slavonian	NA	NA	NA	NA	AA	GA	GG	CC	AA	NA	TT	NA	GG	GG	NA	GG	NA	AA	NA	NA	GG	NA	del--del--	GG	NA	CC	CG	TT	AA	CC	GG	TT	NA	NA	CC	TC	GG	AA	AA
220	Black Slavonian	CT	AA	NA	GT	NA	NA	NA	NA	NA	GA	NA	TC	NA	NA	CC	NA	CC	NA	NA	CC	NA	CC	NA	NA	CC	NA	NA	NA	NA	NA	NA	NA	GG	GA	CC	NA	NA	NA	NA
221	Black Slavonian	NA	NA	NA	NA	AC	GA	GG	CC	AA	NA	AT	NA	GG	GG	NA	GA	NA	AA	NA	NA	GG	NA	del--del--	GG	NA	CC	CG	TT	AC	CC	GG	TA	NA	NA	CC	TC	TG	AA	AA
222	Black Slavonian	CT	AA	AA	GG	AA	AA	GT	CT	AA	NA	TT	TC	GG	GG	CC	GA	CC	AA	NA	CC	GG	CC	del--del--	GG	CC	CT	CC	TT	AA	CC	GG	TT	GG	AA	CC	CC	GG	AA	AA
223	Black Slavonian	CT	AA	AA	GT	CC	AA	GG	CT	AA	GA	TT	TT	GG	GG	CC	GA	CC	AA	NA	CC	GG	CC	del--del--	GG	CC	TT	CC	TT	AA	NA	GG	TT	GG	AA	CC	CC	GG	AA	AA
224	Black Slavonian	CT	AA	AA	GG	NA	NA	NA	NA	NA	GA	NA	CC	NA	NA	CC	NA	CC	NA	NA	CC	NA	CC	NA	NA	CC	NA	NA	NA	NA	NA	NA	NA	GG	GA	CC	NA	NA	NA	NA
225	Black Slavonian	TT	AA	GA	GT	NA	NA	NA	NA	NA	GA	NA	TT	NA	NA	CC	NA	CC	NA	NA	CC	NA	CC	NA	NA	CC	NA	NA	NA	NA	NA	NA	NA	GG	AA	CC	NA	NA	NA	NA
226	Black Slavonian	NA	AA	GA	GT	CC	GA	GG	CT	AA	NA	AT	TT	GT	GG	CC	GA	CC	AA	NA	CC	GG	CC	del--del--	GG	CC	TT	CC	TT	AC	CC	GG	TA	GG	AA	CC	CC	GG	AA	AA
227	Black Slavonian	CT	GA	GG	TT	NA	NA	NA	NA	NA	NA	NA	TT	NA	NA	CC	NA	NA	NA	NA	NA	NA	CC	NA	NA	CC	NA	NA	NA	NA	NA	NA	NA	GG	GG	CC	NA	NA	NA	NA
228	Black Slavonian	CC	AA	GG	TT	AA	GA	GG	CT	AA	GA	AT	CC	GG	GG	CC	GA	CT	AA	NA	CC	GG	CC	del--del--	GA	CC	TT	CC	NA	AC	NA	GG	TA	GG	GA	CC	TC	TT	AA	AA
229	Black Slavonian	CC	GA	GG	TT	NA	NA	NA	NA	NA	GA	NA	TC	NA	NA	CC	NA	CT	NA	NA	CC	NA	CC	NA	NA	CC	NA	NA	NA	NA	NA	NA	NA	GG	GG	CC	NA	NA	NA	NA
230	Black Slavonian	NA	NA	NA	NA	AC	GA	GG	CC	AA	NA	TT	NA	GT	GG	NA	GG	NA	GA	NA	NA	GA	NA	del--del--	GG	NA	TT	CG	TC	AC	CC	GG	TA	NA	NA	CC	TT	GG	AA	AA
231	Black Slavonian	CC	AA	GG	GT	NA	NA	NA	NA	NA	NA	NA	TC	NA	NA	CC	NA	NA	NA	GG	CC	NA	TC	NA	NA	CC	NA	NA	NA	NA	NA	NA	NA	GG	GG	CC	NA	NA	NA	NA
232	Black Slavonian	TT	GA	NA	GT	NA	NA	NA	NA	NA	GG	NA	TC	NA	NA	CC	NA	CC	NA	NA	NA	NA	CC	NA	NA	CC	NA	NA	NA	NA	NA	NA	NA	GG	GG	CC	NA	NA	NA	NA
233	Black Slavonian	NA	NA	NA	NA	NA	NA	NA	NA	NA	NA	NA	NA	NA	NA	NA	NA	NA	NA	NA	NA	NA	NA	NA	NA	NA	NA	NA	NA	NA	NA	NA	NA	NA	NA	NA	NA	NA	NA	NA
234	Black Slavonian	CT	AA	GA	TT	AC	GG	GG	CT	AA	GG	AT	TC	GG	AG	CC	AA	CT	AA	NA	CC	GG	CC	del--del--	GA	CC	CT	CG	TT	CC	CC	GG	TA	GG	GG	CC	TC	TG	AA	AA
235	Black Slavonian	CC	AA	NA	NA	CC	GA	GG	CC	AA	NA	AT	CC	GG	GG	CC	GG	CT	AA	NA	CC	GG	NA	del--del--	GG	CC	CT	CC	TT	AC	CC	GG	AA	GG	GG	CC	TC	GG	AA	NA
236	Black Slavonian	CC	AA	GA	GT	CC	GG	GG	CT	AA	GA	TT	CC	GT	GG	CC	GG	CC	AA	NA	CC	GG	CC	del--del--	GG	CC	TT	CC	TC	AC	NA	GG	TA	GG	GA	CC	TC	GG	AA	AA
237	Black Slavonian	CC	AA	GA	GT	CC	GG	GG	CT	AA	GA	TT	CC	GT	GG	CC	GA	CC	AA	NA	CC	GG	CC	del--del--	GG	CC	CT	CC	TC	AC	CC	GG	TA	GG	GA	CC	TC	TG	AA	AA
238	Black Slavonian	CC	GA	GA	TT	NA	NA	NA	NA	NA	GA	NA	TC	NA	NA	CC	NA	CT	NA	GG	CC	NA	TC	NA	NA	CC	NA	NA	NA	NA	NA	NA	NA	GG	GA	CC	NA	NA	NA	NA
239	Casertana	CT	GG	GG	GG	AA	GG	GG	TT	AA	NA	AT	TT	GG	GG	CC	GG	CC	GG	GG	CC	AA	TT	del--del--	GG	CC	CC	CG	TT	CC	CC	GG	TT	GG	GA	CC	TT	GG	AA	AA
240	Casertana	CT	GG	GG	GT	AC	GA	GG	TT	AA	NA	AA	TC	GG	GG	CC	GG	CC	GG	GG	CC	AA	TT	del--del--	GG	TT	CT	CG	TT	CC	CC	GG	TT	GG	AA	CC	TT	GG	AA	AA
241	Casertana	CT	AA	GG	GT	AC	GA	GG	CT	AA	NA	AA	TC	GG	GG	CC	GG	NA	GG	GG	CC	AA	TT	del--del--	GG	TT	CT	CG	TT	AC	CC	GG	TT	NA	AA	CC	TC	GG	AA	AA
242	Casertana	TT	GA	GG	GT	AC	GA	GG	CC	AA	NA	AT	TC	GG	GG	CC	GG	CC	GG	GG	CC	AA	TT	del--del--	GG	TT	TT	CG	TT	CC	CC	GG	TT	GG	AA	CC	TT	GG	AA	AG
243	Casertana	CT	GG	GG	GT	AC	GA	GG	CT	AA	NA	AT	TC	GG	GG	CC	GG	CC	GG	GG	CC	AA	TT	del--del--	GG	TC	CT	CC	TT	CC	CC	GG	TT	GG	GA	CC	TT	GG	AA	AA
244	Casertana	CT	GG	GG	GT	AA	GG	GG	CC	AA	GA	AT	CC	GG	GG	CC	GA	CT	GG	GG	CC	AA	TT	del--del--	GA	TT	CT	CC	TT	AC	CC	GG	AA	GG	AA	CC	TT	GG	AA	AA
245	Casertana	CT	AA	GG	TT	AA	GG	GG	CT	AA	GA	TT	CC	GG	GG	CC	GA	CC	GG	GG	CC	AA	TT	del--del--	GA	TT	CT	CG	TT	AC	NA	GG	TA	GG	AA	CC	TT	GG	AA	AA
246	Casertana	CC	GG	GG	GT	AA	GG	GG	CC	AA	GA	TT	CC	GG	GG	CC	GA	CT	GG	GG	CC	AA	TT	del--del--	GG	TT	CT	CC	TT	CC	NA	GG	TT	GG	AA	CC	TC	GG	AA	AA
247	Casertana	CT	GG	NA	GT	AA	GG	GG	CC	AA	NA	TT	CC	GG	GG	CC	AA	CT	GG	GG	CC	AA	TT	del--del--	GA	TT	TT	CC	TT	CC	NA	GG	TA	GG	AA	CC	TC	GG	AA	AA
248	Casertana	CT	GG	GG	GT	AA	GG	GG	CT	AA	GA	AT	CC	GG	GG	CC	AA	CC	GG	GG	CC	AA	TT	del--del--	GG	TT	TT	CC	TT	AC	CC	GG	TA	GG	GA	CC	TC	GG	AA	AA
249	Casertana	CT	GA	GG	GT	AA	GG	GG	CC	AA	NA	AT	CC	GG	GG	CC	AA	CT	GG	GG	CC	AA	TT	del--del--	GA	TT	TT	CC	TT	AC	CC	GG	TA	GG	AA	CC	TC	GG	AA	AA
250	Casertana	TT	GG	GG	GG	AA	GG	GG	CC	AA	AA	TT	CC	GG	GG	CC	GA	CT	GG	GG	CC	AA	TT	del--del--	GA	TT	CT	CC	TT	CC	NA	GG	TA	GG	AA	CC	TC	GG	AA	AA
251	Casertana	CC	GG	GG	GG	CC	GG	GT	CC	AA	NA	TT	TC	GG	GG	CC	GA	TT	GG	GG	CC	AA	TT	del--del--	GG	TT	CC	CC	TT	AC	NA	GG	TT	GG	AA	TC	TT	GG	AA	AA
252	Casertana	TT	GG	GG	GT	AA	GG	GG	CT	AA	GA	AA	TC	GG	GG	CC	GG	CC	GG	GG	CC	AA	TT	del--del--	GG	TT	CT	CC	TT	AC	CC	GA	TA	GG	AA	CC	TT	GG	AA	AA
253	Casertana	NA	GG	GG	GG	AC	GG	GG	CC	AA	NA	TT	TT	GT	GG	CC	GA	CC	GG	GA	NA	GA	TT	del--del--	AA	TT	CT	CC	TT	CC	CC	GG	AA	NA	GA	CC	TC	GG	AA	AA
254	Casertana	CT	GG	GG	GT	CC	GG	GG	CC	AA	GA	TT	TT	GG	GG	CC	AA	CC	GG	GG	CC	AA	TT	del--del--	GA	TT	CC	CC	TT	AC	CC	GG	AA	NA	GA	TC	TC	GG	AA	AA
255	Casertana	CT	GG	NA	GT	CC	GG	GG	CC	AA	GG	TT	TT	GG	GG	CC	AA	CC	GG	GG	CC	AA	TT	del--del--	AA	TT	CT	CC	TT	AC	CC	GG	AA	GG	GA	TT	TT	GG	AA	AA
256	Casertana	CT	GG	GG	GT	CC	GG	GG	CC	AA	NA	TT	TT	GG	GG	CC	AA	CC	GG	GG	CC	AA	TT	del--del--	AA	TT	TT	CC	TT	AC	CC	GG	AA	GG	GA	TT	TC	GG	AA	AA
257	Casertana	TT	GG	GG	GT	AA	GA	GG	CC	AA	NA	AA	TC	GT	GG	CC	GG	CC	GG	GG	CC	AA	TT	del--del--	GG	TT	CC	CG	TT	AC	CC	GG	TA	GG	AA	CC	TC	GG	AA	AA
258	Casertana	TT	GG	GG	GT	CC	GG	GG	CC	AA	GA	TT	TT	GG	GG	CC	AA	NA	GG	GG	CC	AA	TT	del--del--	GA	TT	TT	CC	TT	AC	CC	GG	AA	GG	GA	TC	TC	GG	AA	AA
259	Casertana	CC	GG	GG	GG	AC	GG	GG	CC	AA	NA	AT	TC	GG	GG	CC	AA	CC	GG	GG	CC	AA	TT	del--del--	AA	TT	CT	CC	TT	AC	CC	GA	AA	GG	GA	CC	TT	GG	AA	AA
260	Casertana	CT	GG	GG	GG	AC	GG	GG	CC	AA	NA	AT	CC	GT	GG	CC	GA	CC	GG	GG	CC	AA	TT	del--del--	GA	TT	CT	CC	TT	AC	CC	GG	AA	GG	AA	CC	TT	GG	AA	AA
261	Casertana	CT	GG	NA	GG	AC	GG	GG	CC	AA	GG	TT	TC	GG	GG	CC	GA	CC	GG	GG	CC	AA	TT	del--del--	AA	TT	CT	CC	TT	AC	CC	GA	AA	GG	AA	CC	TT	GG	AA	AA
262	Casertana	CC	GG	NA	GG	CC	GG	GT	CC	AA	GG	AA	CC	GG	GG	CC	GG	NA	GG	GG	CC	AA	TT	del--del--	GG	TC	CC	CC	TT	AA	NA	GG	TT	GG	AA	CC	TC	TG	AA	AA
263	Casertana	CC	GG	GG	GG	AC	GG	GG	CC	AA	NA	TT	TC	GT	AG	CC	AA	CC	GG	GG	CC	AA	TT	del--del--	GG	TC	CT	CC	TC	AC	NA	GG	TA	GG	GA	TC	TC	GG	AA	AA
264	Casertana	TT	GA	NA	GT	AA	GG	GG	CT	AA	GG	AT	CC	GG	GG	CC	GG	CC	GG	GA	CT	GA	TT	del--del--	GG	TT	CT	CC	TT	AA	AA	GG	TA	GG	GA	CC	TT	GG	AA	AA
265	Casertana	CT	GG	GG	GT	AA	GG	GG	CC	AA	GA	TT	CC	GG	GG	CC	AA	CC	GG	GG	CC	AA	TT	del--del--	GG	TT	CT	CC	TT	AC	CC	GG	TT	GG	AA	CC	TT	GG	AA	AA
266	Casertana	TT	GG	NA	GT	AA	GA	GG	CC	AA	GG	AT	TT	GG	GG	CC	GG	CC	GG	GG	CC	AA	TT	insCCdel--	GG	TT	CT	CC	TT	AC	CC	GG	TA	GG	AA	CC	TC	GG	AA	AA
267	Casertana	CT	GG	GG	TT	AA	AA	GG	CC	AA	GA	AA	TC	GG	GG	CC	GG	CC	GG	GG	CC	AA	TT	del--del--	GG	TC	TT	CC	TT	CC	CC	GA	TA	GG	AA	CC	TC	GG	AA	AA
268	Casertana	CC	GG	GG	GT	AC	GA	GG	CT	AA	NA	AT	TC	GG	GG	CC	GG	CC	GG	GG	CC	AA	TT	del--del--	GG	TC	CT	CG	TT	CC	CC	GG	TA	GG	AA	CC	TT	GG	AA	AA
269	Casertana	TT	GG	GG	GT	AA	AA	GG	CC	AA	NA	AT	TC	GG	GG	CC	GG	CC	GG	GG	CC	AA	TT	del--del--	GG	TT	TT	CC	TT	CC	CC	GG	TT	GG	AA	CC	TC	GG	AA	AG
270	Casertana	TT	GG	GG	GT	AA	GA	GG	CT	AA	GA	AA	TC	GT	GG	CC	GG	CC	GG	GG	CC	AA	TT	insCCdel--	GG	TT	TT	CG	TT	AC	CC	GG	TA	GG	AA	CC	TC	GG	AA	AA
271	Casertana	CT	GG	GG	GG	AC	GG	GG	CC	AA	NA	TT	CC	GG	GG	CC	GA	CT	GG	GG	CC	AA	TT	del--del--	GG	TT	CT	CC	TT	AC	CC	GG	TT	GG	AA	CC	CC	GG	AA	AA
272	Casertana	TT	GG	GG	GG	AC	GA	GG	TT	AA	NA	AA	TC	GG	GG	CC	GG	CC	GG	GG	CC	AA	TT	del--del--	GG	TC	CC	CG	TT	CC	CC	GG	TA	GG	GA	CC	TT	GG	AA	AA
273	Casertana	TT	GG	GG	GT	AA	AA	GG	CT	AA	GA	AA	TT	GT	GG	CC	GG	CC	GG	GG	CC	AA	TT	del--del--	GG	TT	CT	GG	TT	AC	CC	GG	TA	GG	AA	CC	TT	GG	AA	AA
274	Casertana	CT	GG	NA	GT	AA	AA	GG	CC	AA	GG	AA	TT	GG	GG	CC	GG	CC	GG	GG	CC	AA	TT	insCCdel--	GG	TC	CC	CC	TT	CC	CC	GG	AA	GG	AA	CC	TT	GG	AA	AA
275	Casertana	CT	GG	GG	GG	AC	AA	GG	CC	AA	NA	AT	TC	GG	GG	CT	GG	CC	GG	GG	CC	AA	TT	del--del--	GG	TC	CT	CG	TT	CC	CC	GG	AA	GG	AA	CC	TT	GG	AA	AA
276	Casertana	CT	GG	GG	GG	AA	GA	GG	CC	AA	GA	AT	TT	GG	GG	CC	GG	CC	GG	GG	CC	AA	TT	del--del--	GG	TC	TT	CG	TT	CC	CC	GG	TA	GG	AA	CC	TT	GG	AA	AA
277	Casertana	TT	GG	GG	GG	AA	AA	GG	CC	AA	GA	AA	TT	GT	GG	CC	GG	CC	GG	GG	CC	AA	TT	del--del--	GG	TT	CT	CG	TT	CC	CC	GG	TA	GG	AA	CC	TT	GG	AA	AA
278	Casertana	TT	GG	GG	GT	AA	GG	GG	CT	AA	NA	TT	CC	GG	GG	CC	GA	TT	GG	GG	CC	AA	TT	insCCdel--	GG	TT	TT	CC	TT	AA	CC	GA	AA	GG	AA	CC	TT	GG	AA	AA
279	Casertana	CT	GG	GG	GT	AA	GA	GG	CC	AA	AA	AA	TT	GT	GG	CC	GG	CC	GG	GG	CC	AA	TT	insCCdel--	GG	TT	CT	CG	TT	AC	CC	GG	AA	GG	AA	CC	TC	GG	AA	AA
280	Casertana	CT	GA	GG	GG	AC	GG	GG	CT	AA	NA	AT	CC	GT	AA	CC	AA	CC	GG	GG	CC	AA	TT	del--del--	GG	TT	CT	CC	TC	CC	NA	GG	TA	GG	GA	CC	TT	GG	AA	AA
281	Casertana	CC	GG	GG	GG	AC	GG	GG	CC	AA	NA	AT	TC	GG	GG	CT	GG	CC	GG	GG	CC	AA	TT	del--del--	GG	TT	TT	CC	TT	CC	CC	GG	TA	GG	AA	CC	TT	GG	AA	AA
282	Casertana	CT	GG	GG	GT	AA	GA	GG	CC	AA	GA	AA	TC	GG	GG	CC	GG	CC	GG	GG	CC	AA	TT	insCCdel--	GG	TC	CC	CC	TT	AA	CC	GG	TA	GG	AA	CC	CC	GG	AA	AA
283	Casertana	CT	GG	GG	TT	AA	AA	GG	CC	AA	GA	AA	TT	GT	GG	CC	GG	CC	GG	GG	CC	AA	TT	insCCdel--	GG	TT	CT	CG	TT	CC	CC	GG	TA	GG	AA	CC	TC	GG	AA	AA
284	Casertana	CT	GG	GG	TT	AA	AA	GG	CC	AA	NA	AA	TT	GG	GG	CC	GG	CC	GG	GG	CC	AA	TT	del--del--	GG	TT	TT	CG	TT	CC	CC	GG	TA	GG	AA	CC	TC	GG	AA	AA
285	Casertana	TT	GG	GG	GG	AA	AA	GG	CC	AA	GA	AA	TT	GT	GG	CC	GG	CC	GG	GG	CC	AA	TT	insCCdel--	GG	TC	TT	CG	TT	AC	CC	GG	TA	GG	AA	CC	TC	GG	AA	AA
286	Cinta Senese	CC	GA	NA	GG	CC	GG	GT	CT	AA	GG	AT	CC	GT	GG	TT	AA	CC	GG	GG	CC	AA	TT	del--del--	AA	TT	CC	CC	TT	AA	CC	GG	TT	GG	GG	CC	TT	GG	AA	AA
287	Cinta Senese	CC	GA	GG	TT	AC	GG	GG	CT	AA	AA	AT	TC	TT	GG	TT	AA	CC	GG	GG	CC	AA	TT	insCCdel--	GA	CC	CC	CC	TT	AC	CC	GG	TT	GG	GG	CC	TT	GG	AA	AA
288	Cinta Senese	CC	AA	GG	GG	AC	GG	GG	CT	AA	NA	AA	CC	GG	AA	TT	AA	CC	GG	GA	CT	GA	TT	del--del--	AA	CC	CT	CC	TT	AC	CC	GG	TT	GG	GA	CC	TT	TT	AA	AA
289	Cinta Senese	CC	AA	GG	GT	CC	GA	GT	CT	AA	GA	AT	CC	GT	AG	TT	GA	TT	GG	GG	CC	AA	TT	del--del--	GA	TT	CC	CC	NA	AC	CC	GG	TT	GG	GG	CC	TT	TG	AA	AA
290	Cinta Senese	CC	AA	GG	GG	CC	GA	GT	CT	AA	NA	AT	CC	GT	AG	TT	GA	CC	GG	GG	CC	AA	TT	del--del--	GA	TT	CC	CC	TT	AC	CC	GG	TT	GG	GA	CC	TT	GG	AA	AA
291	Cinta Senese	TT	GG	NA	TT	AC	AA	GT	TT	AA	GG	TT	TC	GT	AG	TT	AA	CC	GG	GG	CC	AA	TT	del--del--	GA	TC	CC	CC	TT	CC	CC	GG	TT	GG	GA	CC	TT	GG	AA	AA
292	Cinta Senese	NA	NA	NA	NA	AC	AA	GG	CT	AA	NA	AT	NA	GG	NA	NA	GA	NA	GG	NA	NA	AA	NA	del--del--	GA	NA	CC	CG	TT	AA	CC	NA	TT	NA	NA	CC	TT	GG	AA	NA
293	Cinta Senese	CC	GG	GG	GG	CC	NA	GT	CC	AA	GA	TT	CC	GT	AG	TT	GG	CT	GG	GG	CC	AA	TT	del--del--	AA	TT	CC	CG	TT	AC	CC	GG	TT	GG	GG	CC	TT	GG	AA	AA
294	Cinta Senese	CC	AA	GG	GG	CC	NA	GT	CT	AA	AA	TT	CC	TT	AG	TT	GA	CC	GG	GG	CC	AA	TT	del--del--	AA	TT	CC	CC	TT	CC	CC	GG	TT	GG	GG	CC	TT	TG	AA	AA
295	Cinta Senese	CC	GG	GG	GG	CC	GG	GT	CT	AA	GA	TT	CC	GT	AG	TT	GA	CC	GG	GG	CC	AA	TT	del--del--	AA	TT	CC	CC	TT	CC	CC	GG	TT	GG	GA	CC	TT	GG	AA	AA
296	Cinta Senese	CT	GA	GG	GT	CC	GA	GT	CT	AA	GA	TT	CC	GT	GG	TT	GG	CC	GG	GA	CT	GA	TT	del--del--	AA	TT	TT	CG	TT	AC	CC	GG	TT	GG	GA	CC	CC	TT	AA	AA
297	Cinta Senese	CC	AA	GG	TT	CC	AA	GT	TT	AA	GA	TT	CC	TT	GG	TT	GA	CC	GG	GG	CC	AA	TT	del--del--	AA	TC	CC	CC	TT	AC	CC	GG	TT	GG	GA	CC	TT	TG	AA	AA
298	Cinta Senese	CC	GA	GG	GT	AC	AA	GG	CC	NA	GA	TT	CC	GT	GG	TT	AA	CC	GG	GG	CC	AA	TT	del--del--	AA	TC	CC	CC	TT	AA	CC	GG	TT	GG	GG	CC	TT	TG	AA	AA
299	Cinta Senese	TT	GA	GG	GT	AC	NA	GT	CT	AA	GA	TT	TC	GG	GG	TT	GA	CC	GG	GG	CC	AA	TT	del--del--	GA	TT	CC	CC	TT	AC	CC	GG	TT	GG	GA	CC	TT	GG	AA	AA
300	Cinta Senese	CC	AA	GG	GT	AC	AA	GG	CT	AA	AA	AT	CC	GT	GG	TT	GG	CC	NA	GG	CC	AA	TT	insCCdel--	GA	NA	CC	CC	TT	AA	CC	GG	TT	GG	GG	CC	TT	GG	AA	AA
301	Cinta Senese	CC	AA	NA	TT	CC	NA	GT	CC	AA	GG	TT	CC	GG	GG	TT	AA	CC	GG	GA	CT	GA	TT	del--del--	AA	TT	CC	CC	TT	AC	CC	GG	TT	GG	GA	CC	TT	TT	AA	AA
302	Cinta Senese	CC	GA	GG	GG	CC	GG	GT	CC	AA	NA	AT	CC	GT	NA	TT	AA	CC	GG	GG	CC	AA	TT	del--del--	GA	TT	CC	CC	TT	AC	CC	GG	TT	GG	GG	CC	TT	GG	AA	AA
303	Cinta Senese	CC	AA	GG	GT	CC	AA	GG	TT	AA	GA	AT	CC	TT	GG	TT	GA	CC	GG	GG	CC	AA	TT	del--del--	GA	TC	CC	CC	TT	AA	CC	GG	TT	GG	GA	CC	TT	GG	AA	AA
304	Cinta Senese	CC	GA	GG	GT	CC	NA	GG	CT	AA	GA	AT	CC	GT	GG	TT	AA	CC	GG	GG	CC	AA	TT	insCCdel--	GA	TC	CC	CC	TT	AC	CC	GG	TT	GG	GG	CC	TT	TG	AA	AA
305	Cinta Senese	CC	AA	GG	TT	CC	NA	TT	CT	AA	GA	AT	CC	GT	GG	TT	GG	CT	GG	GG	CC	AA	TT	insCCdel--	GA	TT	CC	CC	TT	AC	CA	GG	TT	GG	GA	CC	TT	TG	AA	AA
306	Cinta Senese	CT	GA	GG	GG	CC	NA	GT	TT	AA	GA	TT	CC	TT	GG	TT	GG	CC	GG	GG	CC	AA	TT	insCCdel--	GA	TC	CC	CC	TT	CC	CC	GG	TT	GG	GA	CC	TT	GG	AA	AA
307	Cinta Senese	CC	AA	GG	GT	CC	AA	GT	CC	AA	GA	TT	CC	GT	GG	TT	AA	CT	GG	GG	CC	AA	TT	del--del--	AA	TT	CC	CG	TT	CC	CC	GG	TT	GG	GA	CC	TT	GG	AA	AA
308	Cinta Senese	CT	GG	NA	TT	CC	AA	GT	TT	AA	GG	AT	CC	GT	GG	TT	GA	CC	GG	GG	CC	AA	TT	del--del--	AA	CC	CT	CC	TT	AA	CC	GG	TA	GG	AA	CC	TT	TG	AA	AA
309	Cinta Senese	CC	GG	NA	TT	CC	AA	GG	TT	AA	GG	TT	TC	GT	GG	TT	GA	CC	GG	GG	CC	AA	TT	del--del--	AA	TC	CT	CC	TT	AC	CC	GG	TT	GG	GA	CC	TT	TG	AA	AA
310	Cinta Senese	CC	AA	GG	GG	AC	AA	TT	TT	AA	GA	TT	TC	GG	GG	TT	GA	CT	GG	GG	CC	AA	TT	del--del--	GA	TT	CC	CC	TT	AC	CC	GG	TT	GG	GG	CC	TT	TG	AA	AA
311	Cinta Senese	CC	GA	NA	GG	CC	NA	GG	CT	AA	GG	AT	CC	GT	GG	CT	GA	CC	GG	GG	CC	AA	TT	insCCdel--	AA	CC	CC	CC	TT	AA	CC	GG	TT	GG	GA	CC	TT	GG	AA	AA
312	Cinta Senese	CC	GG	NA	TT	AC	NA	GG	CC	AA	GG	TT	CC	TT	GG	TT	AA	CC	GG	GG	CC	AA	TT	insCCdel--	GA	TC	CC	CC	TT	AA	CC	GG	TT	GG	GG	CC	TT	TG	AA	AA
313	Cinta Senese	CC	AA	GG	GT	AC	AA	GG	CC	AA	GA	AT	TC	TT	GG	CT	AA	CC	GG	GG	CC	AA	TT	del--del--	GG	TT	CC	CC	TT	AC	CC	GG	TT	GG	GA	CC	TT	TG	AA	AA
314	Cinta Senese	CT	AA	GG	TT	CC	NA	GT	CT	AA	GA	AA	CC	GG	GG	TT	GG	CC	GG	GG	CC	AA	TT	insCCdel--	GA	TC	CC	CC	TT	AA	CC	GG	TT	GG	GG	CC	TC	TG	AA	AA
315	Cinta Senese	CT	AA	GG	TT	AC	NA	GG	TT	AA	GA	AT	CC	GG	GG	TT	GA	CC	GG	GG	CC	AA	TT	insCCdel--	GA	TC	CT	CC	TT	AC	CC	GG	TT	GG	GA	CC	TT	GG	AA	AA
316	Cinta Senese	CC	GA	NA	GG	CC	NA	GT	CC	AA	GG	AT	CC	GT	GG	TT	GA	CC	GG	GG	CC	AA	TT	del--del--	GA	TT	CC	CC	TT	CC	CA	GG	TT	GG	GA	CC	TT	GG	AA	AA
317	Cinta Senese	CC	GA	GG	TT	CC	AA	GG	CC	AA	GA	AT	CC	GG	GG	TT	AA	CC	GG	GA	CT	GA	TT	del--del--	AA	TT	CC	CC	TT	AA	CA	GG	TT	GG	GA	CC	TT	TG	AA	AA
318	Cinta Senese	CT	GG	NA	GT	AC	GA	GT	CT	AA	GG	TT	CC	TT	GG	TT	GG	CC	GG	GA	CT	GA	TT	del--del--	GA	TT	CC	CC	TT	CC	CC	GG	TT	GG	GG	CC	TC	GG	AA	AA
319	Cinta Senese	CT	AA	GG	GT	CC	NA	GT	CC	AA	GA	TT	TC	GT	GG	TT	GA	CC	GG	GG	CC	AA	TT	insCCdel--	AA	CC	CC	CC	TT	AC	CC	GG	TA	GG	GA	CC	TT	GG	AA	AA
320	Cinta Senese	CT	GG	NA	TT	AC	GG	GG	CC	AA	GG	AT	CC	TT	AG	TT	GG	CC	GG	GG	CC	AA	TT	del--del--	AA	TC	CC	CC	TT	AC	CC	GG	TA	GG	GG	CC	TT	GG	AA	AA
321	Cinta Senese	CC	GG	GG	TT	CC	GG	GG	CT	AA	GA	TT	CC	GT	GG	TT	AA	CT	GG	GG	CC	AA	TT	del--del--	GA	TC	CT	CC	TT	AC	CC	GG	TT	GG	GA	CC	TT	TG	AA	AA
322	Cinta Senese	CC	AA	GG	TT	AC	NA	GT	CT	AA	GA	AA	TC	GT	GG	TT	NA	CC	GG	GG	CC	AA	TT	del--del--	AA	TC	CC	CC	TT	AC	CC	GG	TT	GG	GA	CC	TT	TG	AA	AA
323	Cinta Senese	CT	AA	NA	GT	CC	AA	GT	CT	AA	GG	TT	CC	GT	GG	TT	GG	CC	GG	GG	CC	AA	TT	del--del--	GA	CC	CC	CC	TT	AA	CC	GG	TT	GG	GA	CC	TT	GG	AA	AA
324	Cinta Senese	CC	AA	GG	GT	AC	AA	GG	TT	AA	GA	AT	TC	GT	AG	TT	GA	CC	GG	GG	CC	AA	TT	insCCdel--	GG	TC	CC	CG	NA	AA	CC	GG	TT	GG	GA	CC	TT	GG	AA	AA
325	Cinta Senese	CC	AA	GG	GG	CC	AA	GT	CC	AA	GA	AT	CC	GG	GG	TT	AA	CT	GG	GA	CT	GA	TT	del--del--	AA	TT	CC	CC	TT	CC	CA	GG	TT	GG	GA	CC	TT	GG	AA	AA
326	Cinta Senese	CC	GA	GG	GT	AC	NA	GG	CC	AA	GA	AT	CC	GT	GG	TT	GG	CT	GG	GG	CC	AA	TT	del--del--	GA	TT	CC	CC	TT	AC	CC	GG	TT	GG	GG	CC	TT	GG	AA	AA
327	Cinta Senese	CT	AA	GG	GG	AC	AA	GT	CT	AA	GA	AT	TC	GT	GG	TT	GA	CC	GG	GG	CC	AA	TT	del--del--	GA	TC	CC	CG	TT	AC	CC	GG	TT	GG	GA	CC	TT	TG	AA	AA
328	Cinta Senese	CT	GA	GG	GG	CC	NA	GG	TT	AA	GA	AT	CC	TT	GG	TT	GA	CT	GG	GG	CC	AA	TT	insCCdel--	AA	CC	CC	CC	TT	AA	CC	GG	TT	GG	GA	CC	TT	TG	AA	AA
329	Cinta Senese	CC	AA	GG	TT	CC	AA	GT	CT	AA	AA	TT	CC	GG	GG	TT	GA	CC	GG	GG	CC	AA	TT	insCCdel--	AA	TT	CC	CC	TT	CC	CC	GG	TT	GG	GA	CC	TT	GG	AA	AA
330	Cinta Senese	CC	GG	GG	GT	CC	AA	GG	CT	AA	GA	AT	CC	TT	GG	TT	GG	CT	GG	GG	CC	AA	TT	del--del--	AA	TT	CC	CC	TT	AC	CC	GG	TT	GG	GG	CC	TT	GG	AA	AA
331	Cinta Senese	CC	AA	GG	GT	CC	NA	GT	CT	AA	GA	AT	CC	GT	AG	TT	GA	CT	GG	GG	CC	AA	TT	insCCdel--	AA	TC	CT	CC	TT	CC	CC	GG	TT	GG	GA	CC	TT	TG	AA	AA
332	Cinta Senese	CT	AA	NA	GT	CC	GA	GG	CC	AA	GG	AT	TC	GT	GG	TT	GA	CC	GG	GG	CC	AA	TT	insCCdel--	GA	TC	CC	CC	TT	AA	CC	GG	TT	GG	GA	TC	TT	TG	AA	AA
333	Gascon	TT	GG	GG	GT	CC	AA	GG	TT	AA	GA	AA	TC	GT	GG	CC	GA	CC	GG	GG	CC	AA	TT	del--del--	AA	TT	CC	CC	TT	CC	CC	GG	TA	GG	GG	CC	TC	GG	AA	AA
334	Gascon	CT	GA	GG	TT	CC	GA	GG	CT	AA	NA	TT	TC	TT	GG	CC	GA	TT	GG	GG	CC	AA	TT	del--del--	AA	TT	CT	CC	TT	CC	CC	GG	AA	GG	GA	CC	TC	GG	AA	AA
335	Gascon	TT	GG	GG	GT	CC	GA	GG	TT	AA	GA	TT	TT	GT	GG	CC	GA	CC	GG	GG	CC	AA	TT	del--del--	AA	TT	TT	CC	TT	CC	CC	GG	TA	GG	GG	CC	TT	GG	AA	AA
336	Gascon	CT	GG	GG	TT	AC	GA	GG	TT	AA	NA	TT	TC	GT	GG	CC	GG	CC	GG	GG	CC	AA	TT	del--del--	AA	TT	TT	CC	TT	CC	CC	GG	TA	GG	GG	CC	TT	GG	AA	AA
337	Gascon	CT	GG	GG	TT	CC	GA	GG	TT	AA	AA	AA	TC	GG	GG	CC	GG	CC	GG	GG	CC	AA	TT	del--del--	AA	TT	CT	CC	TT	CC	CC	GG	TA	GG	GA	CC	TT	GG	AA	AA
338	Gascon	TT	GG	GG	TT	CC	GA	GG	TT	AA	NA	AT	TT	GG	GG	CC	GA	CC	GG	GG	CC	AA	TT	del--del--	GG	TT	CT	CG	TT	AC	CC	GG	TT	GG	GG	CC	TT	GG	AA	AG
339	Gascon	CT	GG	GG	GG	AC	GG	GG	CT	AA	NA	AT	TC	GT	GG	CC	GA	CC	GG	GG	CC	AA	TT	del--del--	GA	TT	CC	CG	TT	CC	CC	GG	TA	GG	GG	CC	TT	GG	AA	AA
340	Gascon	TT	GG	GG	TT	CC	GA	GG	TT	AA	GA	TT	TT	GG	GG	CC	AA	CC	GG	GG	CC	AA	TT	del--del--	GA	TT	TT	CC	TT	CC	CC	GG	TA	GG	GG	CC	TC	GG	AA	AA
341	Gascon	CT	GG	GG	TT	CC	GA	GG	TT	AA	NA	TT	TT	GG	GG	CC	AA	CC	GG	GG	CC	AA	TT	del--del--	GA	TT	CT	CG	TT	CC	CC	GG	AA	GG	GA	CC	TC	GG	AA	AA
342	Gascon	CT	GG	GG	TT	CC	AA	GG	CT	AA	NA	TT	TT	GG	GG	CC	AA	CC	GG	GG	CC	AA	TT	del--del--	GA	TT	TT	CC	TT	CC	CC	GG	TA	GG	GA	CC	TC	GG	AA	AA
343	Gascon	TT	GG	GG	TT	CC	GG	GG	CC	AA	AA	AA	TC	GG	GG	CC	GG	CT	GG	GG	CC	AA	TC	del--del--	AA	TT	CT	CC	TT	AC	NA	GG	TA	GG	GA	CC	TT	GG	AA	AA
344	Gascon	TT	GG	GG	GT	CC	AA	GG	CT	AA	NA	AT	TC	GG	GG	CC	GG	CC	GG	GG	CC	AA	TT	del--del--	GA	TC	CT	CC	TT	CC	CC	GG	TT	GG	AA	CC	TT	GG	AA	AA
345	Gascon	CC	GG	GG	TT	CC	GA	GG	TT	AA	AA	AT	TT	GG	GG	CC	GA	CC	GG	GG	CC	AA	TT	del--del--	AA	TT	TT	CC	TT	CC	CC	GG	TA	GG	GG	CC	TT	GG	AA	AA
346	Gascon	CT	GG	GG	GG	AC	AA	GG	TT	AA	AA	TT	CC	GT	GG	CC	AA	CC	GG	GG	CC	AA	TT	del--del--	GA	TT	CT	CG	TT	CC	CC	GG	TT	GG	GG	CC	TT	GG	AA	AA
347	Gascon	TT	GG	GG	TT	AC	AA	GG	TT	AA	NA	AT	CC	GT	GG	CC	GA	CC	GG	GG	CC	AA	TT	del--del--	AA	TT	CT	CG	TT	CC	CC	GG	TT	GG	GA	CC	TT	GG	AA	AA
348	Gascon	CT	GG	GG	TT	AC	GA	GG	CT	AA	NA	TT	CC	GG	GG	CC	GA	CC	GG	GG	CC	AA	TT	del--del--	GA	TT	CC	CG	TT	CC	CC	GG	TA	GG	GG	CC	TT	GG	AA	AA
349	Gascon	TT	GG	GG	TT	AC	GG	GT	TT	AA	GA	TT	CC	GG	GG	CC	GA	CC	GG	GG	CC	AA	TT	del--del--	GA	TC	TT	CC	TT	CC	CC	GG	TT	GG	GG	CC	TT	GG	AA	AA
350	Gascon	CT	GG	GG	TT	AC	GG	GG	TT	AA	GA	AA	CC	GG	GG	CC	GA	CC	GG	GG	CC	AA	TT	del--del--	AA	TT	CC	CG	TT	CC	CC	GG	AA	GG	AA	CC	TT	GG	AA	AA
351	Gascon	CT	GG	GG	GT	CC	GG	GG	TT	AA	GA	AT	CC	GG	GG	CC	GA	CC	GG	GG	CC	AA	TT	del--del--	GA	TC	CT	GG	TT	CC	NA	GG	TA	GG	GG	CC	TT	GG	AA	AA
352	Gascon	TT	GG	GG	GT	AC	GA	GG	TT	AA	GA	AT	TC	GT	GG	CC	GA	CC	GG	GG	CC	AA	NA	del--del--	GA	TT	CT	CC	TT	CC	CC	GG	TA	GG	GG	TC	TT	GG	AA	AA
353	Gascon	CT	GG	GG	GT	CC	GA	GG	TT	AA	AA	AA	TC	GG	GG	CC	GA	CC	GG	GG	CC	AA	TT	del--del--	GA	TT	TT	CC	TT	AC	NA	GG	TT	GG	GA	CC	TT	GG	AA	AA
354	Gascon	CC	GG	GG	TT	AC	GA	GT	TT	AA	GA	AA	TC	GT	GG	CC	GA	TT	GG	GG	CC	AA	TT	del--del--	GA	TT	CT	CC	TT	CC	CC	GG	NA	GG	GA	TC	TT	GG	AA	AA
355	Gascon	CT	GG	GG	TT	CC	GG	GG	TT	AA	NA	AA	TC	GG	GG	CC	GA	CT	GG	GG	CC	AA	TT	del--del--	GA	TT	CT	CC	TT	CC	CC	GG	TA	GG	AA	CC	TT	GG	AA	AA
356	Gascon	CT	GG	GG	GT	CC	GA	GG	CT	AA	NA	TT	TC	GG	GG	CC	GA	CC	GG	GG	CC	AA	TT	insCCdel--	GA	TT	CT	CG	TT	CC	CC	GG	TT	GG	GG	CC	TC	GG	AA	AA
357	Gascon	CT	GG	GG	GT	CC	AA	GG	TT	AA	NA	AT	TC	GG	GG	CC	AA	CT	GG	GG	CC	AA	TT	del--del--	GA	TT	TT	CC	TT	AC	CC	GG	TA	GG	GA	CC	TC	GG	AA	AA
358	Gascon	CT	GG	GG	TT	CC	AA	GG	TT	AA	NA	AA	TC	GT	GG	CC	GA	CC	GG	GG	CC	AA	TT	del--del--	GA	TC	CT	CC	TT	AC	CC	GG	TA	GG	GG	CC	TT	GG	AA	AA
359	Gascon	TT	GG	GG	GT	AC	GG	GG	TT	AA	NA	AT	CC	GG	GG	CC	GA	CC	GG	GG	CC	AA	TT	NA	GG	TT	TT	CC	TT	CC	CC	GG	AA	GG	GA	CC	TT	GG	AA	NA
360	Gascon	CT	GG	GG	TT	CC	AA	GG	CT	AA	NA	AA	TT	GG	GG	CC	AA	CC	GG	GG	CC	AA	TT	del--del--	GA	TT	CC	CG	TT	CC	CC	GG	TT	GG	AA	CC	TT	GG	AA	AA
361	Gascon	TT	GG	GG	GT	CC	AA	GG	TT	AA	GA	AT	TC	GG	GG	CC	GA	CC	GG	GG	CC	AA	TT	del--del--	AA	CC	CT	CC	TT	AC	CC	GG	TA	GG	GA	CC	TT	GG	AA	AA
362	Gascon	CT	GG	NA	TT	CC	GG	GG	TT	AA	NA	AA	TT	GG	GG	CC	GG	CC	GG	GG	CC	AA	TT	del--del--	GA	TT	CC	CC	TT	AC	CC	GG	TA	GG	GG	CC	TT	GG	AA	AA
363	Gascon	CT	GG	GG	GT	AC	GA	GG	CC	AA	GA	AA	CC	GG	GG	CC	GA	CC	GG	GG	CC	AA	TT	del--del--	GA	TT	TT	CC	TT	AC	CC	GG	TA	GG	GG	CC	TT	GG	AA	AA
364	Gascon	CC	GG	GG	TT	CC	GA	GG	CT	AA	AA	AA	TC	GG	GG	CC	GA	CC	GG	GG	CC	AA	TT	del--del--	GA	TT	CT	CC	TT	CC	CC	GG	TA	GG	GA	CC	TT	GG	AA	AA
365	Gascon	CT	AA	GG	GT	AC	NA	GG	TT	AA	NA	AT	TC	GT	GG	CC	GA	TT	GG	GG	CC	AA	TT	del--del--	AA	TT	CT	CG	TT	CC	CC	GG	TA	GG	GG	CC	TC	GG	AA	AA
366	Gascon	TT	GG	GG	GG	CC	AA	GG	TT	AA	NA	TT	TC	GG	GG	CC	AA	CC	GG	GG	CC	AA	TT	del--del--	GA	TT	CT	CC	TT	AC	CC	GG	TA	GG	GG	CC	TT	GG	AA	AA
367	Gascon	CC	GG	GG	GT	AC	AA	GG	TT	AA	NA	AT	TC	GT	GG	CC	GA	CC	GG	GG	CC	AA	TT	del--del--	AA	TT	TT	CC	TT	CC	CC	GG	TA	GG	GA	CC	TT	GG	AA	AA
368	Gascon	TT	GG	GG	TT	CC	GA	GG	TT	AA	NA	AT	CC	GG	GG	CC	GG	CT	GG	GG	CC	AA	TT	del--del--	GA	TT	TT	CC	TT	CC	CC	GG	TA	GG	GG	CC	TT	GG	AA	AA
369	Gascon	CT	GG	GG	GT	CC	GA	GG	CT	AA	NA	TT	TC	GT	GG	CC	GA	CC	GG	GG	CC	AA	TT	del--del--	AA	TT	CT	CC	TT	CC	CC	GG	TA	GG	GA	CC	TT	GG	AA	AA
370	Gascon	TT	GG	GG	GG	CC	GG	GG	CT	AA	NA	AT	TC	GG	GG	CC	GA	CC	GG	GG	CC	AA	TT	del--del--	GA	TT	CT	CG	TT	AC	CC	GG	TA	GG	GG	CC	TT	GG	AA	AA
371	Gascon	CC	GG	GG	TT	CC	AA	GG	TT	AA	GA	AA	TC	GG	GG	CC	AA	CC	GG	GG	CC	AA	TT	insCCdel--	AA	TT	CT	GG	TT	CC	CC	GG	TA	GG	GG	CC	TT	GG	AA	AA
372	Gascon	CT	GG	GG	TT	AC	GG	GT	CT	AA	AA	AT	CC	GT	GG	CC	GA	CC	GG	GG	CC	AA	TT	del--del--	GA	TT	CC	CC	TT	CC	CC	GG	TT	GG	GA	CC	TT	GG	AA	AA
373	Gascon	CC	GG	GG	TT	CC	AA	GG	TT	AA	NA	TT	TC	GG	GG	CC	GG	CC	GG	GG	CC	AA	TT	del--del--	AA	TT	TT	CC	TT	AC	CC	GG	TT	GG	GA	CC	TC	GG	AA	AA
374	Gascon	TT	GG	GG	TT	CC	GA	GG	TT	AA	GA	AA	TC	GG	GG	CC	GA	CC	GG	GG	CC	AA	TT	del--del--	AA	TT	TT	CC	TT	AC	CC	GG	TA	GG	GA	CC	TT	GG	AA	AA
375	Gascon	CT	GG	GG	GT	CC	AA	GG	CT	AA	AA	TT	TC	GT	GG	CC	GG	CT	GG	GG	CC	AA	TT	del--del--	GA	TC	CT	CG	TT	CC	CC	GG	TT	GG	AA	CC	TT	GG	AA	AA
376	Gascon	TT	GG	GG	GT	AC	GA	GG	CT	AA	NA	AA	TC	GG	GG	CC	AA	CC	GG	GG	CC	AA	TT	del--del--	AA	TT	CT	CG	TT	CC	CC	GG	TA	GG	AA	CC	TT	GG	AA	AA
377	Gascon	TT	GG	GG	TT	AC	AA	GT	TT	AA	GA	TT	TT	GG	GG	CC	AA	CC	GG	GG	CC	AA	TT	del--del--	GA	TC	CT	CC	TT	CC	CC	GG	AA	GG	GG	TC	TT	GG	AA	AA
378	Gascon	CT	GG	GG	GT	CC	GA	GT	CT	AA	NA	AA	TC	GT	GG	CC	GA	CC	GG	GG	CC	AA	TT	del--del--	GA	TT	CT	CC	TT	CC	CC	GG	TA	GG	GG	CC	TT	GG	AA	AA
379	Gascon	CT	GG	GG	TT	CC	AA	GG	CC	AA	NA	TT	TC	GG	GG	CC	GA	CT	GG	GG	CC	AA	TT	del--del--	GA	TT	CT	CC	TT	AC	CC	GG	TA	GG	GA	CC	TT	GG	AA	AA
380	Gascon	CT	GG	GG	GT	AC	AA	GG	TT	AA	NA	AT	CC	GG	GG	CC	GA	CC	GG	GG	CC	AA	TT	del--del--	AA	TT	CC	CC	TT	AC	NA	GG	TA	GG	GG	CC	TT	GG	AA	AA
381	Iberian	CT	AA	GG	GT	AC	NA	GT	CC	AA	GA	TT	CC	GG	AG	CC	GA	TT	GG	GG	CC	AA	TT	del--del--	GG	TT	CC	CC	TT	AA	CC	GG	AA	GG	AA	CC	TT	GG	AA	AA
382	Iberian	CC	AA	GG	TT	AC	GG	TT	CC	AA	NA	TT	CC	GG	GG	CC	AA	TT	GG	GG	CC	AA	TT	insCCdel--	GG	TT	CC	CC	TT	AA	CC	GG	AA	GG	GG	CC	TT	GG	AA	AA
383	Iberian	CT	GG	NA	GT	CC	NA	GG	CC	AA	NA	TT	CC	GG	GG	CC	GA	NA	GG	GG	CC	AA	TT	insCCdel--	GG	TT	CC	CC	TT	AA	CC	GG	AA	GG	AA	CC	TT	GG	AA	AA
384	Iberian	CC	GG	GG	GG	AC	AA	GG	CC	AA	NA	AT	CC	GG	AG	CC	GA	TT	GG	GG	CC	AA	TT	insCCdel--	GG	TT	CC	CC	TT	AA	CC	GG	AA	GG	GA	CC	TT	GG	AA	AA
385	Iberian	CT	GG	GG	TT	CC	NA	GG	CC	AA	NA	TT	CC	GG	GG	CC	GG	TT	GG	GG	CC	AA	TT	insCCdel--	GG	TT	CT	CC	TT	AA	CC	GG	AA	GG	GA	CC	TT	GG	AA	AA
386	Iberian	CT	AA	NA	TT	AA	AA	GT	CC	AA	GG	AA	TC	GG	GG	CC	AA	TT	GG	NA	CC	GA	TT	insCCinsCC	GG	TT	CC	CC	TT	AA	CC	GG	AA	GG	GA	CC	TT	GG	AA	AA
387	Iberian	CT	AA	GG	TT	AC	NA	GG	CC	AA	AA	TT	CC	GG	AG	CC	AA	TT	GG	GG	CC	GA	TT	insCCinsCC	GA	TT	CC	CC	TT	AA	CC	GG	AA	GG	GG	CC	TT	GG	AA	AA
388	Iberian	CC	GG	GG	TT	AA	AA	GT	CC	AA	GA	AT	CC	GG	AG	CC	AA	TT	GG	GG	CC	GA	TT	insCCinsCC	GG	TT	CT	CG	TT	AC	CC	GG	AA	GG	GA	CC	TT	GG	AA	AA
389	Iberian	CT	GG	NA	TT	CC	AA	GT	CC	AA	GG	AT	CC	GT	GG	CC	AA	TT	GG	GG	CC	GA	TT	insCCinsCC	GG	TT	CT	CC	TT	AC	CC	GG	AA	GG	GG	CC	TT	GG	AA	AA
390	Iberian	CT	GG	GG	TT	CC	NA	TT	CC	AA	GA	AT	CC	GT	GG	CC	AA	TT	GG	GG	CC	GA	TT	insCCinsCC	GG	TT	CC	CC	TC	AA	CC	GG	AA	GG	AA	CC	TT	GG	AA	AA
391	Iberian	TT	GG	GG	TT	CC	GG	GT	CC	AA	AA	AT	CC	GG	GG	CC	AA	TT	GG	GG	CC	GA	TT	insCCinsCC	GG	TC	CC	CC	TC	AA	CC	GG	TA	GG	GA	CC	TT	GG	AA	AA
392	Iberian	CC	GG	GG	GT	CC	AA	TT	CC	AA	GA	AT	CC	GG	GG	CC	GA	TT	GG	GG	CC	GA	TT	insCCinsCC	GG	TC	CC	CC	TT	AC	CC	GG	TA	GG	AA	CC	TT	GG	AA	AA
393	Iberian	TT	AA	NA	TT	AC	AA	GG	CC	AA	NA	AT	CC	GT	GG	CC	AA	TT	GG	GG	CC	AA	TT	insCCinsCC	GG	TC	CC	CC	TC	AA	CC	GG	AA	GG	GA	CC	TT	GG	AA	AA
394	Iberian	TT	AA	GG	TT	AC	AA	GT	CC	AA	AA	AT	CC	GG	GG	CC	AA	TT	GG	GG	CC	AA	TT	insCCinsCC	GG	TC	CT	CC	TT	AA	NA	GG	AA	GG	GA	CC	TT	GG	AA	AA
395	Iberian	TT	GG	NA	TT	CC	NA	GT	CC	AA	NA	AT	CC	GG	GG	CC	AA	TT	GG	GG	CC	GA	TT	insCCinsCC	GA	TT	CT	CC	TT	AC	CC	GG	AA	GG	GA	CC	TT	GG	AA	AA
396	Iberian	CT	AA	GG	TT	AC	NA	GT	CC	AA	AA	TT	CC	GG	GG	CC	AA	TT	GG	GG	CC	AA	TT	insCCinsCC	GG	TT	CT	CC	TT	AA	CA	GG	AA	GG	GA	CC	TT	GG	AA	AA
397	Iberian	CT	GG	GG	GT	AA	NA	GT	CC	AA	AA	AT	CC	GG	GG	CC	AA	TT	GG	GG	CC	AA	TT	insCCinsCC	GG	TC	CT	CG	TT	AA	CC	GG	AA	GG	GG	CC	TT	GG	AA	AA
398	Iberian	TT	GG	GG	TT	AA	AA	GT	CC	AA	GA	TT	CC	GG	GG	CC	GA	TT	GG	GG	CC	GA	TT	insCCinsCC	GG	TT	CC	CC	TT	AA	CC	GG	AA	GG	AA	CC	TT	GG	AA	AA
399	Iberian	CT	AA	GA	TT	AA	AA	GT	CC	AA	GA	TT	CC	GG	AG	CC	AA	TT	GG	GG	CC	AA	TT	insCCdel--	GA	TT	CT	CC	TT	AA	AA	GG	AA	GG	GG	CC	TT	TG	AA	AA
400	Iberian	CT	GG	GG	TT	AA	AA	GT	CC	AA	GA	AT	CC	GG	GG	CC	GA	TT	GG	GG	CC	GA	TT	insCCinsCC	GG	TT	CC	CC	TT	AA	CC	NA	AA	GG	GA	CC	TT	GG	AA	AA
401	Iberian	NA	GG	GG	TT	AA	AA	GT	CC	AA	GA	TT	CC	GG	GG	CC	AA	TT	GG	GG	CC	GG	TT	insCCinsCC	GG	TT	CT	CC	TC	AA	CA	GG	AA	GG	AA	CC	TT	GG	AA	AA
402	Iberian	TT	GG	GG	TT	AA	AA	GT	CC	AA	GA	TT	CC	GG	GG	CC	AA	TT	GG	GG	CC	GA	TT	insCCinsCC	GG	TT	CC	CC	TT	AA	CC	GG	AA	GG	AA	CC	TT	GG	AA	AA
403	Iberian	CC	AA	GA	TT	AA	AA	GT	CC	AA	GA	AA	CC	GG	GG	CC	AA	TT	GG	GG	CC	GA	TT	insCCdel--	GG	TT	CT	CC	TC	AA	CC	GG	AA	GG	AA	CC	TT	GG	AA	AA
404	Iberian	TT	GA	GG	TT	AA	AA	GT	CC	AA	GA	TT	TC	GG	GG	CC	GG	TT	GG	GG	CC	GA	TT	insCCinsCC	GG	TT	CC	CC	TT	AA	CC	GG	AA	GG	AA	CC	TT	GG	AA	AA
405	Iberian	TT	GA	GG	TT	AC	AA	GG	CC	AA	GA	AT	TC	GG	GG	CC	AA	TT	GG	GG	CC	AA	TT	insCCinsCC	GA	TT	CT	CC	TC	AA	CC	GG	AA	GG	GA	CC	TT	GG	AA	AA
406	Iberian	CT	AA	GG	GT	AC	AA	GT	CC	AA	GA	TT	CC	GG	GG	CC	GA	TT	GG	GG	CC	AA	TT	insCCinsCC	GG	TT	CT	CG	TT	AA	CC	GG	AA	GG	GA	CC	TT	TG	AA	AA
407	Iberian	CT	GA	NA	TT	AA	NA	GT	CC	AA	GG	TT	CC	GG	GG	CC	GA	TT	GG	GG	CC	AA	TT	insCCinsCC	GG	TT	CC	CG	TT	AA	CC	GG	AA	GG	GG	CC	TT	GG	AA	AA
408	Iberian	TT	GA	GG	TT	AC	NA	GT	CT	AA	GA	TT	CC	GG	GG	CC	GA	TT	GG	GG	CC	AA	TT	insCCinsCC	GG	TT	CT	CC	TT	AA	CC	GG	AA	GG	GG	CC	TT	GG	AA	AA
409	Iberian	CC	GG	GG	TT	AA	AA	GT	CC	AA	GA	AA	CC	GT	GG	CC	GA	TT	GG	GG	CC	AA	TT	insCCinsCC	GG	TT	CC	CG	TC	AA	CC	GG	TA	GG	GA	CC	TT	GG	AA	AA
410	Iberian	CC	AA	GG	TT	AC	AA	TT	CC	AA	GA	TT	NA	GG	GG	CC	AA	TT	GG	GG	CC	AA	TT	insCCinsCC	GG	TT	CC	CC	TC	AA	CC	GG	AA	GG	GG	CC	TT	GG	AA	AA
411	Iberian	CC	GG	GG	TT	AA	GG	GT	CC	AA	AA	AT	CC	GT	GG	CC	AA	TT	GG	GG	CC	GG	NA	insCCinsCC	GG	TT	CT	CC	TT	AA	CC	GG	AA	GG	AA	CC	TT	GG	AA	AA
412	Iberian	CC	GG	GG	TT	AC	NA	GG	CC	AA	GA	TT	CC	GG	GG	CC	AA	TT	GG	GG	CC	AA	TT	insCCinsCC	GG	TT	CT	CC	TT	AA	CC	GG	AA	GG	AA	CC	TT	GG	AA	AA
413	Iberian	CT	GG	GG	TT	AC	GG	TT	CC	AA	GA	TT	CC	GT	GG	CC	GG	TT	GG	GG	CC	GG	TT	insCCinsCC	GG	TT	CC	CC	TC	AA	CC	GG	TA	GG	GG	CC	TT	GG	AA	AA
414	Iberian	TT	AA	GG	TT	AC	NA	TT	CT	AA	AA	TT	CC	GG	GG	CC	GA	TT	GG	GG	CC	GA	TT	insCCinsCC	GG	TT	CC	CC	TT	AA	CC	GG	AA	GG	AA	CC	TT	GG	AA	AA
415	Iberian	TT	GG	GG	TT	AA	NA	GG	CT	AA	AA	TT	CC	GG	GG	CC	GG	TT	GG	GG	CC	AA	TT	insCCinsCC	GA	TT	CT	CC	TT	AA	CC	GG	AA	GG	GA	CC	TT	GG	AA	AA
416	Iberian	TT	GA	GG	TT	AA	AA	GT	CT	AA	GA	AT	CC	GG	GG	CC	GG	TT	GG	GG	CC	AA	TT	insCCinsCC	GG	TT	CC	CC	TT	AA	CC	GG	AA	GG	AA	CC	TT	GG	AA	AA
417	Iberian	TT	GG	GG	TT	AC	NA	TT	CT	AA	NA	AT	CC	GG	GG	CC	GA	TT	GG	GG	CC	AA	TT	insCCinsCC	GG	TT	TT	CC	TT	AA	CC	GG	TA	GG	AA	CC	TT	TG	AA	AA
418	Iberian	CT	GA	GG	TT	AA	AA	TT	CC	AA	GA	AT	CC	GG	GG	CC	GA	TT	GG	GG	CC	GA	TT	insCCinsCC	GG	TT	CC	CC	TT	AA	CC	GG	AA	GG	AA	CC	TT	GG	AA	AA
419	Iberian	TT	GA	NA	TT	AA	AA	GG	CC	AA	NA	TT	TC	GG	GG	CC	GA	TT	GG	GG	CC	AA	TT	insCCinsCC	GG	TT	CC	CC	TT	AA	CC	GG	AA	GG	AA	CC	TC	TG	AA	AA
420	Iberian	CT	GG	GG	TT	CC	NA	GG	CC	AA	GA	TT	CC	GG	AG	CC	AA	TT	GG	GG	CC	AA	TT	insCCinsCC	GG	TT	CC	CC	TC	AA	CA	GG	AA	GG	AA	CC	TC	GG	AA	AA
421	Iberian	CT	AA	GG	TT	AA	AA	GT	CC	AA	GA	TT	CC	GG	GG	CC	AA	TT	GG	GG	CC	AA	TT	insCCinsCC	GG	TT	CC	CC	TT	AA	CC	GG	AA	GG	AA	CC	TT	GG	AA	AA
422	Iberian	CC	GG	GA	TT	AC	AA	GT	CC	AA	AA	TT	CC	TT	GG	CC	AA	TT	GG	GG	CC	GA	TT	insCCinsCC	GG	TT	CC	CC	TC	AA	CC	GG	AA	GG	AA	CC	TT	GG	AA	AA
423	Iberian	CC	GG	GG	TT	AC	AA	GT	CC	AA	GA	TT	TC	GG	GG	CC	AA	TT	GG	GG	CC	GA	TT	insCCinsCC	GG	TT	CC	CC	TT	AA	CC	GG	AA	GG	GA	CC	TT	GG	AA	AA
424	Iberian	CC	GA	GG	TT	AA	NA	TT	CC	AA	GA	TT	CC	GG	GG	CC	AA	TT	GG	GG	CC	GA	TT	insCCinsCC	GG	TT	CT	CC	TT	AA	CC	GG	AA	GG	AA	CC	TT	GG	AA	AA
425	Iberian	CT	GG	NA	TT	AA	NA	GG	CC	AA	GG	AT	CC	GG	GG	CC	GA	TT	GG	GG	CC	AA	TT	insCCinsCC	GG	TT	CC	CC	TT	AA	CC	GG	AA	GG	GA	CC	TT	GG	AA	AA
426	Iberian	CC	GG	GG	TT	AC	NA	GT	CC	AA	GA	TT	CC	GG	GG	CC	AA	TT	GG	GG	CC	AA	TT	insCCinsCC	GG	TT	TT	CC	TT	AA	CC	GG	TA	GG	GA	CC	TT	GG	AA	AA
427	Iberian	TT	GG	GG	TT	CC	NA	TT	CC	AA	GA	TT	TC	GG	GG	CC	AA	TT	GG	GG	CC	AA	TT	insCCinsCC	GG	TT	CC	CC	TT	AA	CC	GG	AA	GG	AA	CC	TT	TG	AA	AA
428	Iberian	CT	GG	GG	TT	AC	NA	GT	CC	AA	AA	AT	CC	GG	GG	CC	AA	TT	GG	GG	CC	GA	TT	insCCinsCC	GG	TT	CT	CC	TC	AA	CC	GG	AA	GG	AA	CC	TT	TG	AA	AA
429	Krskopolje	CC	GG	GG	TT	NA	NA	NA	NA	NA	GA	NA	CC	NA	NA	CC	NA	CT	NA	GG	CC	NA	TT	NA	NA	TT	NA	NA	NA	NA	NA	NA	NA	GG	GG	CC	NA	NA	NA	NA
430	Krskopolje	CT	GA	NA	GT	NA	NA	NA	NA	NA	GG	NA	TT	NA	NA	CC	NA	CT	NA	GG	CC	NA	TT	NA	NA	TC	NA	NA	NA	NA	NA	NA	NA	GG	GA	TC	NA	NA	NA	NA
431	Krskopolje	CT	GG	NA	TT	NA	NA	NA	NA	NA	GG	NA	TT	NA	NA	CC	NA	CC	NA	GG	CC	NA	TT	NA	NA	TC	NA	NA	NA	NA	NA	NA	NA	GG	GA	TC	NA	NA	NA	NA
432	Krskopolje	CT	AA	GA	GG	NA	NA	NA	NA	NA	GA	NA	CC	NA	NA	CC	NA	CC	NA	GG	CC	NA	TT	NA	NA	CC	NA	NA	NA	NA	NA	NA	NA	GG	GG	CC	NA	NA	NA	NA
433	Krskopolje	CT	GA	GA	GT	NA	NA	NA	NA	NA	GA	NA	TC	NA	NA	CC	NA	CT	NA	GG	NA	NA	TT	NA	NA	TC	NA	NA	NA	NA	NA	NA	NA	GG	GA	TT	NA	NA	NA	NA
434	Krskopolje	CT	AA	GG	TT	NA	NA	NA	NA	NA	GG	NA	TT	NA	NA	CT	NA	CT	NA	GG	CC	NA	TT	NA	NA	TT	NA	NA	NA	NA	NA	NA	NA	GG	GG	CC	NA	NA	NA	NA
435	Krskopolje	CT	GG	GA	GT	NA	NA	NA	NA	NA	GA	NA	TC	NA	NA	CC	NA	CC	NA	GA	CT	NA	TT	NA	NA	TT	NA	NA	NA	NA	NA	NA	NA	GG	GG	CC	NA	NA	NA	NA
436	Krskopolje	CC	GG	GA	GG	AC	GG	GG	CC	AA	NA	TT	TT	GG	GG	CC	GA	CT	GG	GG	CC	AA	TT	del--del--	AA	TT	TT	CC	TT	CC	CC	GG	TA	GG	GA	CC	TT	GG	AA	AG
437	Krskopolje	CT	GA	NA	GT	NA	NA	NA	NA	NA	NA	NA	TT	NA	NA	CC	NA	CT	NA	GG	CC	NA	TT	NA	NA	TC	NA	NA	NA	NA	NA	NA	NA	GG	GA	CC	NA	NA	NA	NA
438	Krskopolje	CT	GG	GG	TT	NA	NA	NA	NA	NA	GG	NA	TT	NA	NA	CC	NA	CT	NA	GG	CC	NA	TT	NA	NA	TT	NA	NA	NA	NA	NA	NA	NA	GG	GG	CC	NA	NA	NA	NA
439	Krskopolje	CC	GG	NA	GT	NA	NA	NA	NA	NA	NA	NA	CC	NA	NA	CC	NA	CT	NA	GG	CC	NA	TT	NA	NA	CC	NA	NA	NA	NA	NA	NA	NA	GG	GG	TC	NA	NA	NA	NA
440	Krskopolje	CT	GG	GA	TT	NA	NA	NA	NA	NA	AA	NA	TC	NA	NA	CC	NA	CT	NA	GG	CC	NA	TT	NA	NA	TC	NA	NA	NA	NA	NA	NA	NA	GG	GA	CC	NA	NA	NA	NA
441	Krskopolje	CT	GG	GG	GG	NA	NA	NA	NA	NA	GG	NA	TC	NA	NA	CC	NA	CC	NA	GG	CC	NA	TT	NA	NA	TC	NA	NA	NA	NA	NA	NA	NA	GG	GG	TC	NA	NA	NA	NA
442	Krskopolje	CC	AA	GG	GT	NA	NA	NA	NA	NA	NA	NA	TC	NA	NA	CC	NA	CT	NA	GG	CC	NA	TT	NA	NA	TC	NA	NA	NA	NA	NA	NA	NA	GG	GG	TC	NA	NA	NA	NA
443	Krskopolje	CT	AA	GG	GT	NA	NA	NA	NA	NA	GG	NA	TC	NA	NA	CC	NA	CT	NA	GG	CC	NA	TT	NA	NA	TT	NA	NA	NA	NA	NA	NA	NA	GG	GG	CC	NA	NA	NA	NA
444	Krskopolje	CT	GG	GA	TT	AC	NA	GG	CT	AA	NA	AT	TT	GT	AG	CC	GG	CC	GG	GG	CC	AA	TT	insCCdel--	GA	TC	CT	CC	TT	AC	CC	GA	TA	GG	GG	TC	TT	GG	AA	AA
445	Krskopolje	CT	GG	GG	GT	CC	GA	GG	CT	AA	NA	TT	TT	GG	GG	CC	GA	CT	GG	GG	CC	AA	TT	del--del--	GA	TC	TT	CC	TT	CC	CC	GG	AA	GG	GA	TC	TC	GG	AA	AA
446	Krskopolje	CT	GG	GG	GT	CC	GA	GG	CT	AA	AA	AT	CC	GG	GG	CC	GA	CT	GG	GG	CC	AA	TT	del--del--	GA	TT	CT	CC	TT	AA	AA	GG	TA	GG	GA	CC	TC	GG	AA	AA
447	Krskopolje	TT	AA	GG	GT	CC	GG	GG	TT	AA	NA	TT	TT	GG	AG	CC	GA	CT	GG	GG	CC	AA	TT	del--del--	GA	TC	CT	CC	TT	CC	AA	GG	TT	GG	GG	CC	TT	TT	AA	AA
448	Krskopolje	CC	GG	GG	GT	AC	GG	GG	TT	AA	GA	AT	TC	GG	AA	CC	GG	CC	GG	GG	CC	AA	TT	del--del--	AA	TT	CT	CC	TT	AC	CC	GG	AA	GG	GG	CC	TC	TG	AA	AA
449	Krskopolje	CC	GG	GG	GT	CC	NA	GG	CT	AA	NA	AT	TC	GG	AG	CC	GG	CT	GG	GG	CC	AA	TT	insCCdel--	GA	TT	CT	CC	TT	CC	NA	GG	TA	GG	GG	TC	TC	GG	AA	AA
450	Krskopolje	CC	GG	NA	TT	AC	GG	GG	CT	AA	GG	AT	TT	GG	AA	CC	AA	CC	GG	GG	CC	AA	TT	insCCdel--	AA	CC	CT	CC	TT	CC	CC	AA	AA	GG	GG	TC	TT	TG	AA	AA
451	Krskopolje	CT	GG	NA	GT	CC	NA	GG	CT	AA	GA	TT	TC	GG	GG	CC	GA	TT	GG	GG	CC	AA	TT	insCCdel--	AA	CC	CC	CC	TT	CC	CA	GA	AA	GG	GA	CC	TT	TT	AA	AA
452	Krskopolje	CT	GA	NA	TT	CC	GG	GG	CT	AA	GG	TT	TT	GG	GG	CC	GA	CT	GG	GG	CC	AA	TT	del--del--	GA	TC	TT	CC	TT	AC	CA	GG	AA	GG	GA	TC	TC	GG	AA	AA
453	Krskopolje	CC	GG	NA	TT	CC	GG	GG	TT	AA	NA	AT	TT	GG	AG	CC	GG	CT	GG	GG	CC	AA	TT	del--del--	AA	TC	CT	CG	TT	CC	AA	GA	TA	GG	GG	CC	TT	TG	AA	AA
454	Krskopolje	CT	GG	NA	GT	AC	GG	GG	CT	AA	GG	TT	TC	GG	AG	CC	GA	CT	GG	GG	CC	AA	TT	insCCdel--	GA	TT	CC	CG	TT	CC	CA	GG	TA	GG	GA	CC	TT	GG	AA	AA
455	Krskopolje	TT	AA	GA	TT	CC	GG	GG	TT	AA	NA	AT	CC	GG	AG	CC	GG	CC	GG	GG	CC	AA	TT	del--del--	GA	TT	TT	CC	TT	AC	NA	GG	TA	GG	GG	TC	TT	GG	AA	AA
456	Krskopolje	CT	GG	GG	GG	CC	GG	GG	CC	AA	NA	AA	TC	GG	AG	CC	GG	CT	GG	GG	CC	AA	TT	del--del--	AA	TT	TT	CC	TT	AA	CA	GG	TA	GG	GG	CC	TT	GG	AA	AA
457	Krskopolje	CC	GG	GG	GT	CC	GG	GG	TT	AA	NA	TT	TC	GG	AG	CC	GG	CT	GG	GG	CC	AA	TT	del--del--	GA	TC	TT	CC	TT	AC	AA	GA	AA	GG	GG	CC	TT	GG	AA	AA
458	Krskopolje	CT	GG	GA	TT	AC	GG	GG	CC	AA	NA	AT	TT	GG	AG	CC	GG	CT	GG	GA	CT	GA	TT	del--del--	AA	TC	CT	CC	TT	AC	CA	GG	AA	GG	GG	CC	TC	TG	AA	AG
459	Krskopolje	CT	GG	GG	GT	CC	NA	GG	CT	AA	GA	TT	TT	GG	GG	CC	GG	TT	GG	GG	CC	AA	TT	del--del--	AA	CC	TT	CG	TT	AA	AA	GG	AA	GG	GA	CC	TT	GG	AA	AA
460	Krskopolje	CC	AA	GA	GT	CC	GG	GG	TT	AA	NA	AT	TT	GG	GG	CC	GG	CT	GG	GG	CC	AA	TT	insCCdel--	GA	CC	CT	CC	TT	CC	CA	GG	TA	GG	GG	CC	TT	GG	AA	AA
461	Krskopolje	CC	GG	GG	GT	AC	GG	GG	CC	AA	NA	AT	TT	GG	GG	CC	GG	CT	GG	GG	CC	AA	TT	del--del--	AA	TT	CC	CG	TT	CC	CC	GG	TA	GG	GA	CC	TT	TG	AA	AA
462	Krskopolje	CT	GA	GA	GT	CC	GG	GG	TT	AA	GA	AT	TT	GG	AG	CT	GA	CC	GG	GG	CC	AA	TT	del--del--	AA	TT	CT	CC	TT	AC	AA	GG	AA	GG	GG	CC	TT	GG	AA	AG
463	Krskopolje	TT	GG	GG	GT	CC	GG	GG	CT	AA	NA	AA	TT	GG	AG	CC	GA	CT	GG	GG	CC	AA	TT	del--del--	GA	TT	CT	CC	TT	AA	CC	GG	TA	GG	GG	CC	TT	TG	AA	AA
464	Krskopolje	CT	AA	GG	GG	CC	GG	GT	CT	AA	GA	AT	TT	GG	AA	CC	GA	CC	GG	GG	CC	AA	TT	del--del--	GA	TT	TT	CG	NA	CC	CC	GG	TA	GG	GA	CC	TT	TG	AA	AA
465	Krskopolje	CT	GG	GG	GT	CC	GG	GG	CT	AA	GA	AT	TC	GG	GG	CC	GG	CT	GG	GG	CC	AA	TT	insCCdel--	GA	CC	CT	CG	TT	CC	NA	GG	TT	GG	GA	CC	TT	TG	AA	AA
466	Krskopolje	CT	GG	NA	GT	CC	GA	GG	CT	AA	GG	TT	TC	GT	AG	CC	GG	CT	GG	GG	CC	AA	TT	del--del--	GA	CC	TT	CG	TT	AA	CA	GG	TA	GG	GA	TC	TC	GG	AA	AA
467	Krskopolje	CC	GG	GA	GT	CC	GG	GG	TT	AA	NA	AT	TC	GG	AG	CC	GG	CC	GG	GG	CC	AA	TT	insCCdel--	GA	CC	TT	CC	TT	CC	NA	GA	TT	GG	GA	TC	TT	GG	AA	AA
468	Krskopolje	NA	NA	NA	NA	NA	NA	NA	NA	NA	NA	NA	NA	NA	NA	NA	NA	NA	NA	NA	NA	NA	NA	NA	NA	NA	NA	NA	NA	NA	NA	NA	NA	NA	NA	NA	NA	NA	NA	NA
469	Krskopolje	TT	GG	GG	TT	CC	GA	GG	CT	AA	GA	TT	TC	GG	AA	CC	GG	TT	GG	GG	CC	AA	TT	insCCdel--	GA	TC	CT	CG	TT	CC	NA	GG	TA	GG	GG	CC	TC	GG	AA	AA
470	Krskopolje	CC	GG	AA	GG	AC	GG	GG	CC	AA	NA	AT	TC	GT	AG	CC	GA	CT	GG	GG	CC	AA	TT	del--del--	GA	CC	TT	CC	TT	AC	AA	GG	TA	GG	GA	CC	TT	GG	AA	AA
471	Krskopolje	CT	GG	GG	GG	CC	GG	GG	CT	AA	NA	TT	TT	GG	GG	CC	GG	CT	GG	GG	CC	AA	TT	del--del--	AA	TT	CC	CG	TT	AC	CC	GG	AA	GG	GG	CC	TT	TG	AA	AA
472	Krskopolje	CT	GG	NA	GT	AC	GG	GG	CC	AA	GG	AT	TT	GG	GG	CC	GA	CT	GG	GG	CC	AA	TT	del--del--	GA	TC	CT	CG	TT	AC	NA	GG	TA	GG	GA	TC	TT	GG	AA	AA
473	Krskopolje	CC	GG	GG	GT	NA	NA	NA	NA	NA	GA	NA	TT	NA	NA	CC	NA	CT	NA	GG	CC	NA	TT	NA	NA	TC	NA	NA	NA	NA	NA	NA	NA	GG	GG	NA	NA	NA	NA	NA
474	Krskopolje	CT	GA	GG	TT	AC	GA	GG	CT	AA	NA	TT	TT	GG	AG	CC	NA	CT	GG	GG	CC	AA	TT	insCCdel--	GA	TC	TT	CC	TT	AC	CC	GA	TA	GG	GA	TC	TT	TG	AA	AA
475	Krskopolje	TT	AA	GA	GG	AA	GG	GG	TT	AA	NA	AT	TT	GG	AG	CC	GG	CC	GG	GG	CC	AA	TT	del--del--	GG	TT	CT	CC	TT	CC	CC	GG	AA	GG	GG	TT	TC	GG	AA	AA
476	Krskopolje	CT	GA	GA	TT	NA	NA	NA	NA	NA	NA	NA	TT	NA	NA	CC	NA	CT	NA	GG	CC	NA	TT	NA	NA	CC	NA	NA	NA	NA	NA	NA	NA	GG	GA	CC	NA	NA	NA	NA
477	Lithuanian Indigenous Wattle	CT	AA	GA	GT	CC	NA	GG	CT	AA	GG	TT	CC	GG	AA	CC	GG	CT	GG	GG	CC	AA	TT	insCCinsCC	GA	TT	CT	CG	TT	AA	CC	GG	AA	GG	GG	CC	TT	GG	AA	AA
478	Lithuanian Indigenous Wattle	CC	AA	GA	GG	CC	NA	GG	CC	AA	GA	TT	CC	GG	AG	CT	GG	CC	GG	GG	CC	AA	TT	insCCinsCC	AA	TT	CT	CC	TT	AC	CC	GG	AA	GG	GG	CC	TC	GG	AA	AA
479	Lithuanian Indigenous Wattle	CC	AA	GG	GG	CC	NA	GT	CC	AA	AA	TT	CC	GG	AA	CC	GG	CC	GG	GG	CC	AA	TT	insCCinsCC	GA	TT	CT	CG	TT	AA	CC	GG	AA	GG	GA	CC	TT	GG	AA	AA
480	Lithuanian Indigenous Wattle	CC	AA	GG	GG	CC	NA	GG	CT	AA	NA	TT	CC	GG	GG	CC	GG	CC	GG	GG	CC	AA	TT	insCCinsCC	GA	TT	TT	CG	TT	AA	CC	GG	AA	GG	GA	CC	TT	TG	AA	AA
481	Lithuanian Indigenous Wattle	CC	AA	GA	GG	CC	GG	GG	CT	AA	GG	TT	CC	GG	GG	CC	GG	CC	GG	GG	CC	AA	TT	insCCinsCC	GA	TC	TT	CG	TT	AC	NA	GG	AA	GG	GG	CC	TC	GG	AA	AA
482	Lithuanian Indigenous Wattle	CC	AA	GG	GG	AC	GG	GT	CT	AA	GG	AT	TC	GG	GG	CC	GG	CC	GG	GG	CC	AA	TT	insCCinsCC	GG	CC	TT	CG	TT	CC	CC	GG	AA	GG	GG	CC	TT	GG	AA	AA
483	Lithuanian Indigenous Wattle	CT	GA	GG	GG	AA	NA	GG	CC	AA	GA	AA	CC	GT	AG	CC	GG	CC	GG	GG	CC	AA	TT	insCCinsCC	GG	TT	CC	CG	TT	AA	NA	GG	TA	GG	GG	CC	TC	GG	AA	AA
484	Lithuanian Indigenous Wattle	CC	AA	GG	GG	AA	GA	GT	CC	AA	GA	AT	CC	GG	GG	CC	GG	CC	GG	GG	CC	AA	TT	insCCinsCC	GA	TC	CT	CC	TT	AA	NA	GG	AA	GG	GG	CC	TC	GG	AA	AA
485	Lithuanian Indigenous Wattle	CC	AA	GG	GG	AC	GG	GG	CT	AA	NA	TT	CC	GG	GG	CC	GG	CC	GG	GG	CC	AA	TT	insCCinsCC	AA	TC	CT	CC	TT	AA	CC	GG	AA	GG	GG	CC	TT	GG	AA	AA
486	Lithuanian Indigenous Wattle	CC	AA	GG	GG	AC	GG	GT	CT	AA	NA	TT	CC	GG	AG	CC	GG	CC	GG	GG	CC	AA	TT	insCCinsCC	GA	TC	CT	CC	TT	AC	NA	GG	TA	GG	GG	CC	TC	TG	AA	AA
487	Lithuanian Indigenous Wattle	CC	GA	GG	GG	AA	GG	GG	CT	AA	GG	AT	TC	GG	AG	CC	GG	CC	GG	GG	CC	AA	TT	insCCinsCC	AA	TT	TT	CC	TT	AC	CC	GG	TT	GG	GG	CC	TT	GG	AA	AA
488	Lithuanian Indigenous Wattle	CC	AA	GA	GG	AC	GG	GG	CC	AA	NA	AT	TC	GG	GG	CC	GG	CC	GG	GG	CC	AA	TT	insCCinsCC	GA	TC	TT	CC	TT	AC	CC	GG	AA	GG	GG	CC	TC	GG	AA	AA
489	Lithuanian Indigenous Wattle	CT	GA	GG	GT	AC	GG	GG	CC	AA	GA	AT	CC	TT	GG	CC	GG	CC	GG	GG	CC	AA	TT	insCCinsCC	GA	TT	CT	CC	TT	CC	NA	GG	AA	GG	GG	CC	TT	GG	AA	AA
490	Lithuanian Indigenous Wattle	CC	AA	GG	GT	AC	GG	GG	CT	AA	NA	AT	CC	GG	AG	CC	GG	CC	GG	GG	CC	AA	TT	insCCinsCC	GA	TC	CT	CG	TT	AC	NA	GG	AA	GG	GG	CC	TC	GG	AA	AA
491	Lithuanian Indigenous Wattle	CC	AA	GG	GG	AC	GA	GG	CT	AA	NA	AT	TC	GG	AG	CC	GG	TT	GG	GG	CC	AA	TT	insCCinsCC	GA	TC	TT	CG	TT	AC	CC	NA	AA	GG	GG	CC	TC	GG	AA	AA
492	Lithuanian Indigenous Wattle	CC	AA	GG	GG	CC	GG	GG	CC	AA	NA	TT	CC	GG	AG	CC	GG	TT	GG	GG	CC	AA	TT	insCCinsCC	GA	TT	CT	GG	TT	AA	CC	GG	AA	GG	GA	CC	TT	GG	AA	AA
493	Lithuanian Indigenous Wattle	CT	AA	GA	GG	AC	AA	GG	CC	AA	NA	TT	TC	GG	AG	CC	GG	CC	GG	GG	CC	AA	TT	insCCinsCC	AA	TT	CT	CG	TT	AC	CC	GG	AA	GG	GA	CC	TT	TG	AA	AA
494	Lithuanian Indigenous Wattle	CT	AA	GA	GT	CC	AA	GG	CC	AA	GA	TT	CC	GG	AG	CC	GG	CT	GG	GG	CC	AA	TT	insCCinsCC	GA	TT	TT	CG	TT	AA	CC	GG	AA	GG	GG	CC	TT	TG	AA	AA
495	Lithuanian Indigenous Wattle	CC	AA	GG	GG	AC	GA	GT	CC	AA	AA	AA	CC	GG	GG	CC	GG	CC	GG	GG	CC	AA	TT	insCCinsCC	GA	TT	TT	CG	TT	AA	NA	GG	AA	GG	GG	CC	TT	GG	AA	AA
496	Lithuanian Indigenous Wattle	CC	AA	GG	GT	AC	GG	GG	CC	AA	NA	AT	CC	GG	AG	CC	GG	CC	GG	GG	CC	AA	TT	insCCinsCC	GA	TT	TT	CG	TT	AC	CC	GG	TA	GG	GG	CC	TC	GG	AA	AA
497	Lithuanian Indigenous Wattle	CC	AA	GG	GG	AC	GA	GG	CT	AA	GA	AT	CC	GG	AG	CC	GG	CC	GG	GG	CC	AA	TT	insCCinsCC	AA	TT	TT	CG	TT	AC	CC	GG	AA	GG	GG	CC	TC	GG	AA	AA
498	Lithuanian Indigenous Wattle	CC	GA	GG	GT	AC	GG	GT	CT	AA	AA	AT	CC	GT	AG	CC	GG	TT	GG	GG	CC	AA	TT	insCCinsCC	GG	TC	CT	CG	TT	AC	CC	GG	TA	GG	GG	CC	TC	GG	AA	AA
499	Lithuanian Indigenous Wattle	CT	GA	GG	GG	AC	GG	GG	CT	AA	GA	AT	CC	GT	AG	CC	GG	CC	GG	GG	CC	AA	TT	insCCinsCC	GA	TT	CT	GG	TT	AC	AA	GG	TA	GG	GG	CC	TT	GG	AA	AA
500	Lithuanian Indigenous Wattle	CT	GA	GG	GG	AC	GG	GG	CC	AA	GA	AT	CC	GT	AG	CC	GG	CC	GG	GG	CC	AA	TT	insCCinsCC	GA	TT	CC	CC	TT	AC	NA	GG	TA	GG	GG	CC	TC	GG	AA	AA
501	Lithuanian Indigenous Wattle	CT	AA	GG	GT	AC	GG	GT	CT	AA	GA	TT	TC	GT	AG	CC	GG	CC	GG	GG	CC	AA	TT	insCCinsCC	GG	CC	CT	GG	TT	CC	NA	GG	AA	GG	GG	CC	TC	GG	AA	AA
502	Lithuanian Indigenous Wattle	CC	AA	GG	GG	CC	GG	GT	CT	AA	AA	TT	CC	GG	AA	CC	GG	TT	GG	GG	CC	AA	TT	insCCinsCC	GA	CC	TT	CG	TT	AC	CC	GG	TA	GG	GA	CC	CC	TG	AA	AA
503	Lithuanian Indigenous Wattle	CT	GA	GG	TT	AC	NA	GG	CT	AA	NA	AT	CC	TT	AG	CC	GG	CC	GG	GG	CC	AA	TT	insCCinsCC	GA	TT	CT	CG	TT	AC	NA	GG	AA	GG	GG	CC	TT	GG	AA	AA
504	Lithuanian Indigenous Wattle	CC	GA	GG	GG	CC	GA	GT	CT	AA	NA	TT	CC	GG	GG	CC	GG	CC	GG	GG	CC	AA	TT	insCCinsCC	GA	CC	TT	CG	TT	AC	CC	GG	AA	GG	GG	CC	TT	GG	AA	AA
505	Lithuanian Indigenous Wattle	CC	AA	GA	GG	AC	GA	GG	CT	AA	NA	AT	CC	NA	GG	CC	GG	CC	GG	GG	CC	AA	TT	insCCinsCC	AA	TC	CT	CC	TT	AA	CC	GG	AA	GG	GG	CC	TT	GG	AA	AA
506	Lithuanian Indigenous Wattle	CC	AA	GG	GT	AA	GG	GG	CC	AA	GA	AT	CC	GG	AG	CC	GG	CC	GG	GG	CC	AA	TT	insCCinsCC	AA	TC	CC	CC	TT	AA	NA	GG	AA	GG	GG	CC	TC	GG	AA	AA
507	Lithuanian Indigenous Wattle	CT	GA	GG	GT	AC	GG	GT	TT	AA	GA	TT	CC	GG	GG	CC	GG	TT	GG	GG	CC	AA	TT	insCCinsCC	GA	TT	TT	GG	TT	AC	CC	GG	AA	GG	GG	CC	TT	GG	AA	AA
508	Lithuanian Indigenous Wattle	CT	AA	GG	GT	CC	GA	GT	CC	AA	NA	AT	CC	GG	GG	CC	GG	CC	GG	GG	CC	AA	TT	insCCinsCC	GG	TT	CT	CG	TT	CC	CC	GG	AA	GG	GG	CC	TT	GG	AA	AA
509	Lithuanian Indigenous Wattle	CT	AA	GA	GT	AC	GA	GT	CC	AA	GA	AT	CC	GG	GG	CC	GG	CC	GG	GG	CC	AA	TT	insCCinsCC	GA	TC	CC	CC	TT	CC	CC	GG	AA	GG	GG	CC	TC	GG	AA	AA
510	Lithuanian Indigenous Wattle	CC	AA	GG	GT	AC	GG	GG	CT	AA	GA	AT	CC	GG	AG	CC	GG	CC	GG	GG	CC	AA	TT	insCCinsCC	AA	TT	TT	CG	TT	AA	CC	GG	AA	GG	GG	CC	TC	GG	AA	AA
511	Lithuanian Indigenous Wattle	CT	AA	GA	GT	CC	AA	GG	CC	AA	GA	TT	CC	GG	GG	CT	GG	CT	GG	GG	CC	AA	TT	insCCinsCC	AA	TT	TT	CG	TT	AC	CC	GG	AA	GG	GG	CC	TT	TG	AA	AA
512	Lithuanian Indigenous Wattle	CT	GA	GG	GG	AC	GG	GG	CC	AA	GG	TT	CC	GG	GG	CC	GG	CT	GG	GG	CC	AA	TT	insCCinsCC	GG	TC	CT	GG	TC	CC	AA	GA	TA	GG	GG	CC	TC	GG	AA	AA
513	Lithuanian Indigenous Wattle	CC	AA	GG	GG	AA	GA	TT	CT	AA	NA	AT	TC	GG	GG	CC	GG	CC	GG	GG	CC	AA	TT	insCCinsCC	GG	CC	TT	CG	TT	AC	CC	GG	AA	GG	GG	CC	TT	GG	AA	AA
514	Lithuanian Indigenous Wattle	CC	AA	GG	GG	CC	GA	GG	CC	AA	GA	TT	CC	GG	GG	CC	GG	CC	GG	GG	CC	AA	TT	insCCinsCC	GA	TT	TT	CG	TT	AC	CC	GG	AA	GG	GG	CC	TC	GG	AA	AA
515	Lithuanian Indigenous Wattle	CC	AA	GA	GG	CC	GA	GG	TT	AA	GA	TT	CC	GG	GG	CC	GG	CC	GG	GG	CC	AA	TT	insCCinsCC	AA	TT	TT	CC	TT	CC	CC	GG	AA	GG	GG	CC	TT	GG	AA	AA
516	Lithuanian Indigenous Wattle	CC	AA	GA	GT	AC	GG	GG	TT	AA	NA	TT	TC	GG	GG	CC	GG	CC	GG	GG	CC	AA	TT	insCCinsCC	GA	TT	TT	CG	TT	AA	CC	GG	TA	GG	GG	CC	TC	NA	AA	AA
517	Lithuanian Indigenous Wattle	CT	AA	GG	GG	CC	NA	GG	CC	AA	NA	AT	CC	GT	AG	CC	GG	CC	GG	GG	CC	AA	TT	insCCinsCC	GG	TT	CT	GG	TT	AC	CC	GG	AA	GG	GG	CC	TT	GG	AA	AA
518	Lithuanian Indigenous Wattle	CC	GA	GA	GT	CC	NA	GG	CT	AA	NA	TT	CC	GG	GG	CC	GG	CC	GG	GG	CC	AA	TT	insCCinsCC	AA	TT	TT	CC	TT	AC	CC	GG	TA	GG	GG	CC	TT	GG	AA	AA
519	Lithuanian Indigenous Wattle	CC	GA	GG	GG	AC	GA	GG	CT	AA	GA	TT	CC	GG	GG	CC	GG	CC	GG	GG	CC	AA	TT	insCCinsCC	AA	TC	CT	CC	TT	AC	CC	GG	TA	GG	GA	CC	TC	TG	AA	AA
520	Lithuanian Indigenous Wattle	TT	GA	GA	GG	AC	GG	GG	CC	AA	GA	AT	CC	GT	AG	CC	GG	CC	GG	GG	CC	AA	TT	insCCinsCC	GA	TT	CC	CC	TT	AC	CC	GG	AA	GG	GG	CC	TC	GG	AA	AA
521	Lithuanian Indigenous Wattle	CT	AA	GG	GG	CC	NA	GG	CC	AA	GA	TT	CC	GG	GG	CC	GG	CC	GG	GG	CC	AA	TT	insCCinsCC	AA	TT	CT	CG	TT	AA	CC	GG	AA	GG	GG	CC	TC	TG	AA	AA
522	Lithuanian Indigenous Wattle	CC	AA	GG	GT	AC	GA	TT	TT	AA	NA	TT	TC	GG	GG	CC	GG	CC	GG	GG	CC	AA	TT	insCCinsCC	GG	TC	TT	CG	TT	CC	CC	GG	AA	GG	GG	CC	TC	GG	AA	AA
523	Lithuanian Indigenous Wattle	TT	GA	GA	GT	CC	NA	GG	CC	AA	NA	TT	CC	GT	AG	CC	GG	TT	GG	GG	CC	AA	TT	insCCinsCC	GA	TT	CC	CG	TT	AA	CC	GG	AA	GG	GG	CC	TT	GG	AA	AA
524	Lithuanian Indigenous Wattle	CC	AA	GG	GG	CC	NA	GG	CC	AA	AA	TT	CC	GG	GG	CT	GG	CT	GG	GG	CC	AA	TT	insCCinsCC	GA	TT	TT	CG	TT	AC	CC	GG	AA	GG	GA	CC	TT	GG	AA	AA
525	Lithuanian White Old Type	CC	GG	GG	TT	AC	GG	GG	CC	AA	GA	TT	CC	GT	AG	CC	GG	TT	GG	GG	CC	AA	TT	insCCinsCC	AA	TC	CT	CG	TT	CC	NA	GA	TT	GG	AA	CC	TC	GG	AA	AA
526	Lithuanian White Old Type	CT	GG	GG	GT	AA	NA	GG	CC	AA	NA	TT	TC	TT	GG	CC	GG	CT	GG	GA	CT	GA	TT	insCCdel--	GA	TC	TT	CG	TT	AC	AA	GG	TA	GG	AA	CC	TT	GG	AA	AA
527	Lithuanian White Old Type	CT	GG	GA	GT	AA	GG	GT	CC	AA	GA	TT	CC	GT	GG	CC	GG	TT	GG	GG	CC	AA	TT	insCCinsCC	GG	TC	CT	CG	TT	CC	AA	GG	TT	GG	GA	CC	CC	GG	AA	AA
528	Lithuanian White Old Type	CC	GG	GG	TT	CC	AA	GG	CT	AA	GA	TT	CC	GT	GG	CC	GG	CC	GG	GG	CC	AA	TT	insCCinsCC	AA	TC	TT	CG	TT	CC	CC	GA	TT	GG	AA	CC	TT	GG	AA	AA
529	Lithuanian White Old Type	CC	GA	GG	GT	AC	GA	GT	CC	AA	GA	TT	TC	GT	GG	CC	GA	CC	GG	GG	CC	AA	TT	insCCinsCC	GA	TC	TT	CC	TT	AC	NA	GG	TA	GG	GG	TC	TC	GG	AA	AA
530	Lithuanian White Old Type	CT	GG	GG	TT	AC	GG	GG	CC	AA	NA	AT	CC	GT	GG	CC	GA	CT	GG	GG	CC	AA	NA	insCCinsCC	AA	TC	CC	CC	TC	CC	AA	GA	AA	GG	GA	CC	CC	GG	AA	AA
531	Lithuanian White Old Type	CC	GG	GG	TT	AA	AA	GG	CC	AA	NA	TT	TT	TT	GG	CC	GA	TT	GG	GA	CT	GA	TT	insCCdel--	AA	CC	CT	CG	TC	AC	AA	GG	TA	GG	GA	CC	TC	GG	AA	AA
532	Lithuanian White Old Type	CC	GG	GG	GT	AC	GA	GG	CC	AA	GA	TT	CC	NA	AG	CC	GG	CT	GG	GG	CC	AA	TT	insCCinsCC	AA	TC	CT	CC	TT	CC	CC	GG	TT	GG	AA	CC	TC	NA	AA	AA
533	Lithuanian White Old Type	CC	GG	GG	GG	AC	AA	TT	CT	AA	GA	TT	CC	GT	GG	CC	GG	CC	GG	GG	CC	AA	TT	insCCinsCC	GG	TC	TT	CG	TC	AC	CA	GA	TT	GG	GG	CC	TT	GG	AA	AA
534	Lithuanian White Old Type	CC	GA	GG	GG	AA	GA	GG	CC	AA	NA	TT	CC	TT	GG	CC	GG	TT	GG	GG	CC	AA	TT	insCCinsCC	GA	TC	TT	GG	CC	CC	AA	NA	TT	GG	GG	CC	TC	GG	AA	AA
535	Lithuanian White Old Type	CC	GG	GG	GG	AA	GA	GG	CC	AA	GA	TT	CC	GG	GG	CC	GG	TT	GG	GG	CC	AA	TT	insCCinsCC	GA	CC	CT	GG	CC	CC	AA	GA	TT	GG	GG	CC	TC	GG	AA	AA
536	Lithuanian White Old Type	CC	GG	GG	GT	AC	GA	GT	CT	AA	GA	TT	CC	TT	GG	CC	GG	TT	GG	GG	CC	AA	TT	insCCinsCC	GA	CC	CC	GG	CC	AA	NA	GG	TA	GG	GG	CC	TC	GG	AA	AA
537	Lithuanian White Old Type	CC	GA	GG	GT	AC	GA	GG	CC	AA	GA	TT	TC	TT	GG	CC	GG	CC	GG	GG	CC	AA	TT	insCCinsCC	GA	TT	CT	CG	TC	CC	CC	GG	AA	GG	GA	TC	TT	GG	AA	AA
538	Lithuanian White Old Type	CC	AA	NA	GT	AA	AA	GG	CC	AA	GG	TT	TC	GT	GG	CC	GG	CC	GG	GA	CT	GA	TT	insCCdel--	GA	TC	TT	GG	TC	CC	CA	GA	TT	GG	GG	TC	TT	GG	AA	AA
539	Lithuanian White Old Type	CC	GG	GG	TT	AC	GG	GT	CC	AA	GA	TT	CC	GT	GG	CC	GA	CT	GG	GG	CC	AA	TT	insCCinsCC	GA	CC	CC	CC	TT	AC	NA	GG	TA	GG	GA	CC	CC	GG	AA	AA
540	Lithuanian White Old Type	CC	GG	GG	GG	AA	GA	GG	CC	AA	NA	TT	TT	GT	GG	CC	GG	TT	GG	GG	CC	AA	TT	insCCinsCC	AA	TC	CT	CG	TC	CC	NA	GA	TA	GG	GA	TC	TC	GG	AA	AA
541	Lithuanian White Old Type	CC	GG	GG	GT	AC	GA	GG	CC	AA	NA	TT	TC	TT	GG	CC	GA	CT	GG	GA	CT	GA	TT	insCCdel--	GG	TT	TT	GG	TT	AC	AA	GG	AA	GG	GA	CC	TC	GG	AA	AA
542	Lithuanian White Old Type	CC	GG	GG	GG	AA	GA	GT	CC	AA	NA	TT	TC	GT	GG	CC	GA	TT	GG	GA	CT	GA	TT	insCCdel--	GA	TC	CT	GG	TT	AC	NA	GG	AA	GG	AA	TC	TT	GG	AA	AA
543	Lithuanian White Old Type	CC	GA	GG	GT	AA	GA	GG	CC	AA	GA	TT	CC	GT	GG	CC	GA	CT	GG	GA	CT	GA	TT	insCCdel--	GA	CC	CT	CG	TC	CC	AA	GG	TA	GG	GG	CC	TC	GG	AA	AA
544	Lithuanian White Old Type	CC	GA	GG	GG	AA	GA	GG	CC	AA	GA	TT	CC	GT	GG	CC	GG	CT	GG	GA	CT	GA	TT	insCCdel--	GA	CC	TT	GG	TC	CC	CC	GG	TA	GG	GA	CC	TT	GG	AA	AA
545	Lithuanian White Old Type	CC	GG	GG	GT	AC	GG	GT	CC	AA	GG	TT	TC	GT	GG	CC	GA	CT	GG	GG	CC	AA	TT	insCCinsCC	GG	TC	CT	GG	TC	AC	CC	GG	AA	GG	GA	TC	TC	GG	AA	AA
546	Lithuanian White Old Type	CC	GG	GG	TT	AA	AA	GG	CC	AA	NA	TT	TC	TT	GG	CC	GA	CC	GG	GG	CC	AA	TT	insCCinsCC	AA	CC	CT	CG	CC	CC	CC	GG	TA	GG	GA	CC	TT	GG	AA	AA
547	Lithuanian White Old Type	CC	GG	GG	TT	AA	NA	GG	CC	AA	NA	TT	TC	TT	GG	CC	GG	CT	GG	GG	CC	AA	TT	insCCinsCC	AA	CC	CT	GG	TC	AA	AA	GG	TA	GG	AA	CC	TC	GG	AA	AA
548	Lithuanian White Old Type	CC	GG	GA	GT	AA	NA	GT	CC	AA	NA	TT	TC	GT	GG	CC	GG	TT	GG	GG	CC	AA	TT	insCCinsCC	GA	TC	CC	CG	TC	CC	AA	GG	TA	GG	GG	CC	TC	GG	AA	AA
549	Lithuanian White Old Type	CC	GG	GG	GT	AA	AA	GT	CT	AA	GA	TT	CC	GT	GG	CC	GG	TT	GG	GG	CC	AA	TT	insCCinsCC	GA	TC	CC	CC	TC	CC	AA	GG	TA	GG	AA	CC	TT	GG	AA	AA
550	Lithuanian White Old Type	CC	GA	GG	GT	AC	GA	GG	CC	AA	GA	TT	TC	TT	GG	CC	GG	CC	GG	GG	CC	AA	TT	insCCinsCC	GA	TT	CT	CG	TC	CC	CC	GG	AA	GG	GA	TC	TT	GG	AA	AA
551	Lithuanian White Old Type	CC	GG	GG	GT	AC	GA	GG	CT	AA	GA	TT	CC	GT	NA	CC	GG	TT	GG	GG	CC	AA	TT	insCCinsCC	AA	TC	CT	CC	TT	CC	NA	GG	TA	GG	AA	CC	TT	GG	AA	AA
552	Lithuanian White Old Type	CC	GG	GG	TT	AA	GA	GT	CT	AA	GA	TT	TC	GT	GG	CC	GG	CC	GG	GG	CC	AA	TT	insCCinsCC	GA	CC	CT	CG	TC	CC	NA	GG	TA	GG	GA	CC	TC	GG	AA	AA
553	Lithuanian White Old Type	CC	GG	GG	TT	AC	GA	GT	CT	AA	NA	TT	CC	GG	AG	CC	GG	TT	GG	GG	CC	AA	TT	insCCinsCC	GA	TC	CC	CG	TT	CC	NA	GG	TA	GG	AA	CC	TT	GG	AA	AA
554	Lithuanian White Old Type	CC	GG	GG	GG	AA	NA	GT	CT	AA	GA	TT	TC	GT	GG	CC	GG	CC	GG	GA	CT	GA	TT	NA	GG	TC	TT	CG	TT	AC	CA	NA	TT	GG	GA	CC	TT	GG	AA	AA
555	Lithuanian White Old Type	CC	GG	GG	GT	AA	GG	GG	CC	AA	NA	TT	TT	GT	GG	CC	GA	CT	GG	GA	CT	GA	TT	insCCdel--	GG	TC	TT	GG	TT	AC	CC	GG	AA	GG	GA	TC	TC	GG	AA	AA
556	Lithuanian White Old Type	CC	GG	GG	GT	AA	AA	GG	CT	AA	GA	TT	TC	GT	GG	CC	GA	TT	GG	GG	CC	AA	TT	insCCinsCC	AA	CC	CT	CG	TT	CC	AA	GG	AA	GG	GA	CC	TT	GG	AA	AA
557	Lithuanian White Old Type	CC	GG	GG	TT	AC	AA	GG	CC	AA	GA	TT	TC	TT	GG	CC	GG	TT	GG	GA	CT	GA	TT	insCCdel--	AA	TC	CT	GG	TC	CC	AA	GG	TA	GG	GA	CC	TT	GG	AA	AA
558	Lithuanian White Old Type	CC	GG	GG	TT	AC	GA	GG	CC	AA	AA	TT	CC	GG	GG	CC	GA	CC	GG	GG	CC	AA	TT	insCCinsCC	AA	CC	CC	CC	TT	CC	AA	GG	TA	GG	AA	CC	CC	GG	AA	AA
559	Lithuanian White Old Type	CC	GG	GG	TT	AC	GA	GT	CC	AA	AA	TT	CC	TT	GG	CC	GG	TT	GG	GG	CC	AA	TT	insCCinsCC	GG	CC	CT	CG	TC	AC	NA	GA	TA	GG	GG	CC	TC	GG	AA	AA
560	Lithuanian White Old Type	CC	GG	NA	TT	CC	AA	GG	CT	AA	GG	TT	CC	GT	GG	CC	GG	CC	GG	GG	CC	AA	TT	insCCinsCC	AA	TC	TT	CG	TT	CC	CC	GA	TT	GG	AA	CC	TT	GG	AA	AA
561	Lithuanian White Old Type	CC	GG	GG	GT	AC	AA	GG	CC	AA	GG	AT	CC	GG	GG	CC	GA	CT	GG	GG	CC	AA	TT	insCCinsCC	AA	CC	CT	CG	TC	CC	CC	GG	TT	GG	GA	CC	TC	GG	AA	AA
562	Lithuanian White Old Type	CC	GG	GG	GT	AC	GA	GG	CC	AA	NA	AT	CC	GG	AG	CC	GG	CC	GG	GG	CC	AA	TT	insCCinsCC	AA	CC	CT	CG	TC	CC	NA	GA	TT	GG	GA	CC	TC	GG	AA	AA
563	Lithuanian White Old Type	CC	GG	GG	GG	AA	GG	GG	CT	AA	GA	TT	TC	GG	GG	CC	GG	CC	GG	GG	CC	AA	TT	insCCinsCC	GA	TC	TT	CG	TC	CC	AA	GA	TT	GG	GG	CC	TC	GG	AA	AA
564	Lithuanian White Old Type	CC	GA	GG	GG	AA	AA	GG	CT	AA	NA	TT	CC	TT	GG	CC	GG	TT	GG	GG	CC	AA	TT	insCCinsCC	GA	CC	TT	CG	CC	CC	AA	GA	TA	GG	GA	CC	TT	GG	AA	AA
565	Lithuanian White Old Type	CC	GG	GG	GT	AA	AA	GT	CC	AA	GA	TT	TC	TT	AG	CC	GG	CT	GG	GG	CC	AA	NA	insCCinsCC	GA	TC	TT	GG	TC	CC	CC	GG	TT	GG	GA	TC	CC	GG	AA	AA
566	Lithuanian White Old Type	CC	GG	GG	TT	AC	GG	GG	CT	AA	NA	TT	TC	GT	GG	CC	GG	TT	GG	GG	CC	AA	TT	insCCinsCC	AA	TC	TT	GG	TC	CC	NA	GG	TT	GG	GA	CC	TC	GG	AA	AA
567	Lithuanian White Old Type	CC	GG	GG	GG	AA	GA	GG	CC	AA	GA	TT	CC	GT	GG	CC	GG	TT	GG	GG	CC	AA	TT	insCCinsCC	AA	TC	CC	CC	TT	CC	CC	GG	TA	GG	GA	CC	TT	GG	AA	AA
568	Lithuanian White Old Type	CC	GG	GG	GG	AA	GA	GT	CC	AA	GA	TT	CC	TT	AG	CC	GG	TT	GG	GA	CT	GA	TT	insCCdel--	GA	CC	CT	CG	TC	CC	CC	GG	AA	GG	GG	CC	TC	GG	AA	AA
569	Lithuanian White Old Type	CC	AA	GG	GG	AC	AA	TT	CC	AA	GA	TT	CC	GT	AG	CC	GG	TT	GG	GA	CT	GA	TT	insCCdel--	GG	TC	TT	CC	TC	CC	CC	AA	TA	GG	GA	CC	TC	GG	AA	AA
570	Lithuanian White Old Type	CC	GG	GG	GT	AC	GA	GG	CC	AA	AA	AT	CC	GT	AG	CC	GA	CT	GG	GG	CC	AA	TT	insCCinsCC	AA	CC	CT	CG	TC	CC	CA	GA	TA	GG	GA	CC	TT	GG	AA	AA
571	Lithuanian White Old Type	CC	GA	GG	GG	AC	GG	GG	CT	AA	NA	TT	CC	GG	GG	CC	GG	TT	GG	GG	CC	AA	TT	insCCinsCC	AA	TC	CT	CG	TC	CC	AA	GG	TT	GG	GG	CC	CC	TG	AA	AA
572	Lithuanian White Old Type	CC	AA	GG	GG	AA	GA	GG	CT	AA	GA	TT	CC	GT	AG	CC	GG	TT	GG	GA	CT	GA	TT	insCCdel--	AA	CC	TT	CC	CC	CC	AA	AA	TA	GG	AA	CC	TC	GG	AA	AA
573	Majorcan Black	CT	GG	GG	GT	AA	GA	GG	CC	AA	GA	TT	CC	GG	GG	CC	GA	CT	GG	GG	CC	AA	TT	del--del--	GA	TT	CT	CC	TT	AC	NA	GG	TA	GG	GA	CC	TT	TG	AA	AA
574	Majorcan Black	TT	GA	GG	TT	AC	GG	TT	CC	AA	AA	AT	TC	GG	GG	CC	AA	CC	GG	GG	CC	AA	TT	del--del--	GG	TT	CT	CC	TT	AA	NA	GG	AA	GG	AA	CC	TT	GG	AA	AA
575	Majorcan Black	CC	GG	GG	GT	AA	GA	GG	CC	AA	AA	AT	CC	GG	GG	CC	AA	TT	GG	GG	CC	AA	TT	del--del--	GG	TC	TT	CG	TT	AA	CC	GG	TA	GG	GA	CC	TT	TG	AA	AA
576	Majorcan Black	TT	GG	GG	TT	AC	GG	GT	CT	AA	GA	TT	TC	GT	GG	CC	GA	TT	GG	GG	CC	AA	TT	del--del--	GG	TT	CC	CC	TT	AA	NA	GG	TA	GG	GA	CC	TC	TT	AA	AA
577	Majorcan Black	CT	GG	GG	TT	AA	GG	GG	CC	AA	GA	TT	TC	GG	GG	CC	GA	TT	GG	GG	CC	AA	TT	del--del--	GG	TT	CC	CC	TC	AA	CC	GG	TA	GG	GA	CC	TC	GG	AA	NA
578	Majorcan Black	CT	GG	GG	TT	AC	GG	GG	CT	AA	NA	AT	TC	GG	GG	CC	AA	TT	GG	GG	CC	AA	TT	del--del--	GG	TT	CT	CG	TT	AA	NA	GG	AA	GG	GA	CC	TT	TT	AA	AA
579	Majorcan Black	CT	GA	GG	TT	AA	NA	GG	CT	AA	NA	AT	TT	GG	GG	CC	AA	TT	GG	GG	CC	AA	TT	del--del--	GG	TC	CC	CG	TT	AA	CC	GG	AA	GG	GA	CC	TT	TG	AA	AA
580	Majorcan Black	CT	GA	GG	TT	AC	GA	GG	CC	AA	GA	TT	TC	GG	GG	CT	AA	CT	GG	GG	CC	AA	TT	insCCdel--	GG	TT	CT	CC	TT	AA	NA	GG	TA	GG	GG	CC	TT	TG	AA	AA
581	Majorcan Black	CT	GG	GG	TT	AC	GG	GG	CC	AA	GA	AT	CC	GG	GG	CC	AA	CT	GG	GG	CC	AA	TT	del--del--	GG	TT	CT	GG	TT	AA	NA	GG	TA	GG	AA	CC	TT	TT	AA	AA
582	Majorcan Black	TT	AA	GG	TT	CC	NA	GG	CT	AA	GA	TT	TC	GG	AG	CC	AA	TT	GG	GG	CC	AA	TT	del--del--	GG	TC	CC	CC	TT	AA	CC	GG	TA	GG	GG	CC	TT	GG	AA	AA
583	Majorcan Black	CT	GG	GG	GT	AC	AA	GG	CC	AA	GA	TT	CC	GG	AG	NA	AA	CT	GG	GG	CC	AA	TT	del--del--	GG	TT	CC	CC	TT	AA	NA	GG	AA	GG	GA	CC	TT	TG	AA	AA
584	Majorcan Black	CT	AA	GG	GT	AC	GG	GG	CC	AA	GA	AT	CC	GG	AG	CT	AA	TT	GG	GG	CC	AA	TT	del--del--	GG	TC	CT	CC	TT	AA	CC	GG	AA	GG	GG	CC	TT	GG	AA	AA
585	Majorcan Black	CT	AA	GG	GT	CC	GG	GG	CC	AA	GA	TT	TC	GG	AG	CT	AA	CC	GG	GG	CC	AA	TT	del--del--	GG	TT	TT	CC	TT	AA	CC	GG	TA	GG	GA	CC	TT	GG	AA	AA
586	Majorcan Black	CC	GA	GG	TT	AC	GG	GG	CC	AA	NA	AT	TC	GT	GG	CT	GA	CT	GG	GG	CC	AA	TT	del--del--	GG	TC	CT	CC	TT	AA	NA	GG	AA	GG	GA	CC	TT	TG	AA	AA
587	Majorcan Black	CT	GA	GG	GT	AA	GG	GG	CC	AA	NA	TT	CC	GG	GG	CT	AA	CT	GG	GG	CC	AA	TT	del--del--	GG	TT	CT	CC	TT	AA	CC	GG	AA	GG	GA	CC	TT	GG	AA	AA
588	Majorcan Black	CC	GA	GG	GT	AC	GA	GG	CC	AA	AA	AT	CC	GG	GG	CT	GA	TT	GG	GG	CC	AA	NA	insCCdel--	GG	TT	CT	CC	TT	AA	CC	GG	AA	GG	GA	CC	TT	TG	AA	AA
589	Majorcan Black	CC	AA	GG	TT	AC	AA	GT	CC	AA	AA	AT	CC	GG	GG	CC	GA	CT	GG	GG	CC	AA	TT	del--del--	GG	TT	CT	CG	TT	CC	NA	GG	AA	GG	GA	CC	TT	TT	AA	AA
590	Majorcan Black	CT	AA	GG	TT	AC	NA	GG	CC	AA	AA	AA	CC	GG	GG	CC	GA	CT	GG	GG	CC	AA	TT	del--del--	GG	TC	CC	CG	TT	CC	NA	GG	AA	GG	GG	CC	TC	TG	AA	AA
591	Majorcan Black	TT	AA	GG	TT	AC	NA	GG	CC	AA	GA	AT	CC	GG	GG	CC	GA	TT	GG	GG	CC	AA	TT	del--del--	GG	TT	CC	CC	TT	AC	CC	GG	TA	GG	GA	CC	TC	TT	AA	AA
592	Majorcan Black	CT	GA	GG	TT	AC	GG	GT	CC	AA	GA	AT	CC	GG	AG	CT	AA	CT	GG	GG	CC	AA	TT	del--del--	GG	TT	CT	CG	TT	AA	NA	GG	TA	GG	GA	CC	TT	GG	AA	AA
593	Majorcan Black	CT	GG	GG	TT	AC	NA	GG	CC	AA	NA	TT	TC	GG	AG	CC	GA	TT	GG	GG	CC	AA	TT	del--del--	GG	CC	CT	CC	TT	AA	CC	GG	TA	GG	AA	CC	TT	GG	AA	AA
594	Majorcan Black	CC	GG	GG	TT	CC	GG	GG	CC	AA	GA	TT	TC	GG	GG	CC	AA	CT	GG	GG	CC	AA	TT	del--del--	GG	TC	CT	CC	TT	AA	NA	GG	AA	GG	GA	CC	TT	GG	AA	AA
595	Majorcan Black	CC	GG	GG	TT	AA	GG	GG	CC	AA	AA	TT	CC	GT	GG	CC	AA	TT	GG	GG	CC	AA	TT	del--del--	GA	CC	CT	CC	TT	AA	NA	GG	AA	GG	GG	CC	TT	TG	AA	AA
596	Majorcan Black	TT	AA	GG	TT	AA	GG	GG	CC	AA	GA	AA	TC	GT	AG	CC	GA	TT	GG	GA	CT	AA	TT	del--del--	GG	TC	CC	CC	TT	AA	CC	GG	AA	GG	AA	CC	TT	TT	AA	AA
597	Majorcan Black	CT	GG	GG	TT	AC	GG	GG	CC	AA	GA	TT	CC	GG	AG	CC	AA	CT	GG	GG	CC	AA	TT	del--del--	GG	TT	CT	CC	TC	AA	CC	GG	TA	GG	GG	CC	TT	GG	AA	AA
598	Majorcan Black	CT	AA	GG	TT	AC	NA	TT	CC	AA	NA	AT	CC	GG	GG	CC	AA	TT	GG	GG	CC	AA	TT	del--del--	GG	TT	CT	CC	TT	AA	NA	GG	AA	GG	GA	CC	TT	TG	AA	AA
599	Majorcan Black	TT	GG	GA	TT	AC	GG	GT	CC	AA	GA	AT	CC	GG	GG	CC	GA	TT	GG	GG	CC	AA	TT	insCCdel--	GG	CC	CC	CC	TT	AC	NA	GG	AA	GG	GG	CC	TT	TG	AA	AA
600	Majorcan Black	CT	GG	GG	NA	AA	GG	GG	CC	AA	AA	TT	CC	GG	AG	CC	GA	CT	GG	GG	CC	AA	TT	del--del--	GG	TT	CC	CC	TT	AA	CC	GG	TA	GG	AA	CC	TT	GG	AA	AA
601	Majorcan Black	CT	GG	GG	TT	AC	GG	GT	CT	AA	GA	TT	TC	GG	AG	CC	AA	CC	GG	GG	CC	AA	TT	del--del--	GG	TT	CC	CC	TT	AA	CC	GG	TA	GG	GA	CC	TT	GG	AA	AA
602	Majorcan Black	CT	AA	GG	TT	AC	GA	GG	CC	AA	GA	AA	TC	GG	GG	CC	GG	TT	GG	GG	CC	AA	TT	del--del--	GG	TT	CT	CC	TC	AC	CC	GG	AA	GG	AA	CC	TT	GG	AA	AA
603	Majorcan Black	CT	GG	GG	TT	AC	GA	GT	TT	AA	NA	AT	TC	GG	GG	CC	AA	CC	GG	GG	CC	AA	TT	del--del--	GG	TC	CC	CC	TT	AA	NA	GG	TA	GG	GG	CC	TT	TG	AA	AA
604	Majorcan Black	CT	GG	GG	GT	AC	GG	GG	CT	AA	GA	AT	CC	GG	AG	CC	AA	TT	GG	GG	CC	AA	TT	del--del--	GG	TC	TT	CC	TT	AA	NA	GG	AA	GG	GG	CC	TT	GG	AA	AA
605	Majorcan Black	CT	AA	GG	TT	AC	GG	GG	CC	AA	GA	TT	CC	GT	GG	CC	NA	TT	GG	GG	CC	AA	TT	del--del--	GG	TC	CT	CC	TT	AA	CC	GG	TT	GG	GA	CC	TT	TG	AA	AA
606	Majorcan Black	CT	GG	GG	TT	CC	GG	GG	CT	AA	AA	TT	TT	GG	AG	CC	AA	TT	GG	GG	CC	AA	TT	del--del--	GG	TC	CC	CC	TT	AA	NA	GG	TA	GG	GG	CC	TT	GG	AA	AA
607	Majorcan Black	CT	AA	GG	TT	AA	GA	GT	CC	AA	AA	TT	CC	GG	GG	CC	AA	CT	GG	GG	CC	AA	TT	insCCdel--	GG	TC	CT	CC	TT	AA	CC	GG	TA	GG	GA	CC	TT	TG	AA	AA
608	Majorcan Black	CT	GG	GG	GT	AA	AA	GT	CC	AA	GA	AT	CC	GG	GG	CC	AA	CT	GG	GG	CC	AA	TT	del--del--	GG	TT	CT	CC	CC	AA	CC	GG	TA	GG	GG	CC	TT	GG	AA	AA
609	Majorcan Black	CT	GG	GG	TT	AA	GG	GT	CC	AA	GA	AT	TC	GT	GG	CC	AA	CT	GG	GG	CC	AA	TT	del--del--	GG	TC	TT	CC	TT	AA	NA	GG	TA	GG	GA	CC	TC	TT	AA	AA
610	Majorcan Black	CT	AA	GG	TT	AC	GA	GG	CC	AA	GA	TT	CC	GG	GG	CC	AA	TT	GG	GG	CC	AA	TT	del--del--	GG	TC	CC	CC	TT	AA	CC	GG	TA	GG	GA	CC	TT	TG	AA	AA
611	Majorcan Black	CT	GA	GG	TT	AA	GG	GT	CC	AA	GA	AT	CC	GG	AA	CC	GA	CC	GG	GG	CC	AA	TT	insCCdel--	GA	TT	CT	CC	TT	AA	CC	GG	AA	GG	GA	CC	TT	TG	AA	NA
612	Majorcan Black	CT	AA	GG	GT	AC	GG	GG	CC	AA	GA	TT	CC	GT	AG	CT	AA	TT	GG	GG	CC	AA	TT	del--del--	GG	TT	TT	CC	TT	AA	CC	GG	TA	GG	AA	CC	TT	GG	AA	AA
613	Majorcan Black	TT	GG	GG	TT	AA	AA	GG	CC	AA	AA	AA	CC	GG	AA	CC	NA	CT	GG	GG	CC	AA	TT	del--del--	GA	CC	CC	CC	TT	AA	CC	GG	AA	GG	GG	CC	TT	TG	AA	AA
614	Majorcan Black	CC	GG	GG	TT	AC	NA	GG	CC	AA	AA	AT	CC	TT	GG	CC	AA	TT	GG	GG	CC	AA	TT	del--del--	GA	TT	CT	CG	TT	AA	NA	GG	AA	GG	GA	CC	TT	TT	AA	AA
615	Majorcan Black	TT	GG	GG	TT	AA	GG	GG	CT	AA	GA	TT	CC	GG	GG	CC	GA	CC	GG	GG	CC	AA	TT	del--del--	GG	TT	TT	CC	TT	AA	NA	GG	TA	GG	GA	CC	TT	TT	AA	AA
616	Majorcan Black	CT	AA	GG	TT	AC	GG	GG	CC	AA	GA	TT	TC	GG	GG	CT	AA	CC	NA	GG	CC	GA	TC	del--del--	GG	TT	CT	CG	TT	AA	CC	GG	TA	GG	GA	CC	TT	GG	AA	AA
617	Majorcan Black	TT	GG	GG	TT	CC	NA	TT	CC	AA	GA	AT	TC	GG	AG	CT	AA	CT	NA	GG	CC	GA	TC	del--del--	GG	TC	CT	CG	TT	AC	CC	GG	AA	GG	GA	CC	TT	GG	AA	AA
618	Majorcan Black	TT	GG	GG	TT	AA	GG	GG	CC	AA	NA	AT	TT	GG	GG	CC	AA	TT	GG	GG	CC	GA	TT	del--del--	GG	TT	CC	CG	TT	AA	NA	GG	AA	GG	GG	CC	TT	TT	AA	AA
619	Majorcan Black	CT	GG	GG	TT	AA	GG	GT	CC	AA	AA	AT	CC	GG	GG	CC	AA	CT	GG	GG	CC	NA	TT	del--del--	GG	TT	CC	CC	TT	AA	NA	GG	AA	GG	GG	CC	TT	TT	AA	AA
620	Majorcan Black	CT	AA	GG	TT	CC	GG	GG	CC	AA	GA	TT	TC	GG	GG	CT	AA	CT	GG	GG	CC	NA	TT	del--del--	GA	TT	TT	CC	TT	AA	CC	GG	TA	GG	AA	CC	TT	TG	AA	AA
621	Mora Romagnola	CT	GG	GG	TT	AA	AA	GG	CT	AA	NA	AA	TC	GG	GG	CC	GA	CC	GG	GA	CT	GG	TT	del--del--	GG	TT	TT	CC	TT	AA	CC	GG	TT	GG	GG	CC	CC	GG	AA	AA
622	Mora Romagnola	CT	GG	GG	TT	AA	AA	GG	CT	AA	GG	AA	CC	GT	GG	CC	GA	CC	GG	GA	CT	GG	TT	del--del--	GA	TT	CT	CC	TT	AC	CC	GG	TT	GG	GG	CC	CC	GG	AA	AA
623	Mora Romagnola	TT	GG	GG	TT	AA	AA	GG	CT	AA	NA	AA	CC	GG	GG	CC	GA	CC	GG	AA	TT	GG	TT	del--del--	GG	TT	CC	CC	TT	AA	CA	GG	TT	GG	GG	CC	CC	GG	AA	AA
624	Mora Romagnola	CT	GG	GG	TT	AC	AA	GG	TT	AA	GA	TT	CC	GT	GG	CC	AA	CC	GG	GA	CT	GG	TT	del--del--	GG	TT	CT	CC	TT	AA	CC	GG	TT	GG	GG	CC	CC	GG	AA	AA
625	Mora Romagnola	CT	GG	GG	TT	NA	NA	NA	NA	NA	NA	NA	CC	NA	NA	CC	NA	CC	NA	GA	NA	NA	TT	NA	NA	TT	NA	NA	NA	NA	NA	NA	NA	GG	GG	CC	NA	NA	NA	NA
626	Mora Romagnola	NA	NA	NA	NA	NA	NA	NA	NA	NA	NA	NA	NA	NA	NA	NA	NA	NA	NA	NA	NA	NA	NA	NA	NA	NA	NA	NA	NA	NA	NA	NA	NA	NA	NA	NA	NA	NA	NA	NA
627	Mora Romagnola	CT	GG	GG	GT	AA	AA	GG	TT	AA	NA	AA	CC	GT	GG	CC	AA	CC	GG	GA	CT	GG	TT	del--del--	GG	TT	TT	CC	TT	AC	CC	GG	TT	GG	GG	CC	CC	GG	AA	AA
628	Mora Romagnola	CT	GG	GG	TT	NA	GA	GG	CC	AA	NA	AA	CC	GG	GG	CC	NA	CC	GG	GA	CT	GG	TT	del--del--	GA	TT	CT	CC	TT	AA	NA	GG	TT	GG	GG	CC	TC	GG	AA	AA
629	Mora Romagnola	NA	NA	NA	NA	NA	NA	NA	NA	NA	NA	NA	NA	NA	NA	NA	NA	NA	NA	NA	NA	NA	NA	NA	NA	NA	NA	NA	NA	NA	NA	NA	NA	NA	NA	NA	NA	NA	NA	NA
630	Mora Romagnola	TT	GG	GG	TT	AA	AA	GG	CC	AA	GA	AA	TC	GG	GG	CC	AA	CC	GG	AA	TT	GG	TT	del--del--	GG	TT	CC	CC	TT	AA	CC	GG	TT	GG	GG	CC	CC	GG	AA	AA
631	Mora Romagnola	CC	GG	GG	TT	AA	AA	GG	CT	AA	GA	AA	TC	GG	GG	CC	GA	CC	GG	GA	CT	GG	TT	del--del--	GG	TT	CT	CC	TT	AA	CC	GG	TT	GG	GG	CC	CC	GG	AA	AA
632	Mora Romagnola	TT	GG	GG	TT	AA	AA	GT	CT	AA	GA	AA	TC	TT	GG	CC	GA	CC	GG	GA	CT	GG	TT	del--del--	GG	TT	CT	CC	TT	AA	CC	GG	TT	GG	GG	CC	TC	GG	AA	AA
633	Mora Romagnola	CC	GG	GG	TT	AA	GA	GG	TT	AA	GA	AA	CC	GT	AG	CC	AA	CC	GG	GG	CC	GG	TT	del--del--	GG	TT	CT	CC	TT	AA	CC	GG	TT	GG	GA	CC	CC	GG	AA	AA
634	Mora Romagnola	NA	GG	GG	NA	AA	AA	GG	TT	AA	NA	AT	CC	GG	GG	CC	AA	CC	GG	GA	NA	GG	TT	del--del--	GG	TT	TT	CC	TT	AC	CC	GG	TT	NA	GG	CC	TC	GG	AA	AA
635	Mora Romagnola	TT	GG	GG	TT	AA	AA	GG	CC	AA	NA	AA	CC	GG	AG	CC	GA	CC	GG	GA	CT	GG	TT	del--del--	GA	TT	CC	CC	TT	AA	CC	NA	TT	GG	GG	CC	CC	GG	AA	AA
636	Mora Romagnola	TT	GG	GA	GT	AA	GA	GG	CT	AA	GA	AA	CC	TT	GG	CC	AA	CC	GG	GG	CC	GG	TT	del--del--	GG	TT	CT	CC	TT	AC	CC	GG	TT	GG	AA	CC	CC	GG	AA	AA
637	Mora Romagnola	TT	GG	GG	TT	AA	GA	GG	TT	AA	NA	AT	CC	GT	GG	CC	AA	CC	GG	GA	CT	GG	TT	del--del--	GG	TT	CT	CC	TT	AC	CC	GG	TT	GG	GG	CC	CC	GG	AA	AA
638	Mora Romagnola	TT	GG	GA	GT	AA	GA	GG	CC	AA	NA	AT	CC	GT	GG	CC	AA	CC	GG	GA	CT	GG	TT	del--del--	GG	TT	CT	CC	TT	AA	CC	GG	TT	GG	GG	CC	TC	GG	AA	AA
639	Mora Romagnola	CT	GG	GG	GT	AA	GA	GG	CT	AA	NA	AA	CC	TT	GG	CC	AA	CC	GG	GG	CC	GG	TT	del--del--	GG	TT	CT	CC	TT	AC	CC	GG	TA	GG	GA	CC	CC	GG	AA	AA
640	Mora Romagnola	TT	GG	GG	TT	AA	AA	GG	CT	AA	GA	AA	CC	GT	GG	CC	GA	CC	GG	GA	CT	GG	TT	del--del--	GG	TT	TT	CC	TT	NA	CC	GG	TA	GG	GA	CC	NA	GG	AA	AA
641	Mora Romagnola	TT	GG	GG	TT	AA	AA	GG	CT	AA	GA	AT	CC	GG	GG	CC	AA	CT	GG	GA	CT	GG	TT	del--del--	GA	TT	CT	CC	TT	NA	CC	GG	TT	GG	GG	CC	NA	GG	AA	AA
642	Mora Romagnola	CT	GG	AA	TT	AA	GA	GG	CC	AA	NA	AT	CC	GT	GG	CC	GA	CC	GG	GA	CT	GG	TT	del--del--	GG	TT	CT	CC	TT	AA	CC	GG	TT	GG	GG	CC	CC	GG	AA	AA
643	Mora Romagnola	TT	GG	NA	TT	AC	GA	GG	CC	AA	NA	AA	CC	GT	GG	CC	GA	CC	GG	AA	TT	GG	TT	del--del--	GG	TT	CT	CC	TT	AA	CC	GG	TT	GG	GG	CC	CC	GG	AA	AA
644	Mora Romagnola	TT	GA	AA	GT	AC	GG	GG	TT	AA	GA	AT	CC	TT	GG	CC	GA	CC	GG	AA	TT	GG	TT	del--del--	GA	TT	CC	CC	NA	AA	CC	NA	TA	GG	GA	CC	CC	GG	AA	AA
645	Mora Romagnola	TT	GG	GG	TT	AA	GA	GG	CT	AA	NA	AA	CC	GG	GG	CC	GA	CC	GG	AA	TT	GG	TT	del--del--	GG	TT	CC	CC	NA	AA	CC	GG	TT	GG	GG	CC	CC	GG	AA	AA
646	Mora Romagnola	CC	GG	GG	GT	AC	AA	GG	TT	AA	NA	AT	CC	TT	GG	CC	AA	CC	GG	GG	CC	GG	TT	del--del--	GA	TT	CT	CC	TT	AA	CC	GG	TT	GG	GG	CC	CC	GG	AA	AA
647	Mora Romagnola	CT	GG	GG	GG	AA	AA	GG	CT	AA	NA	AA	CC	TT	GG	CC	AA	CC	GG	GA	CT	GG	TT	del--del--	GA	TT	TT	CC	TT	AA	CC	GG	TT	GG	GG	CC	CC	GG	AA	AA
648	Mora Romagnola	TT	GA	GG	TT	AA	AA	GG	CT	AA	GA	AA	CC	GT	GG	CC	GA	CC	GG	GG	CC	GG	TT	del--del--	GG	TT	CC	CC	TT	AA	CA	GG	TA	GG	GA	CC	CC	GG	AA	AA
649	Mora Romagnola	CT	GG	GG	TT	AA	AA	GG	CT	AA	NA	AA	CC	GG	GG	CC	AA	CC	GG	GG	CC	GG	TT	del--del--	GA	TT	CC	CC	TT	AA	CC	GG	TT	GG	GG	CC	TC	GG	AA	AA
650	Mora Romagnola	TT	GG	GG	TT	CC	AA	GT	CT	AA	GA	AT	CC	GT	GG	CC	GA	CC	GG	GG	CC	GG	TT	del--del--	GG	TT	TT	CC	NA	AA	CC	GG	TA	GG	GG	CC	CC	GG	AA	AA
651	Mora Romagnola	TT	GG	GG	TT	AA	AA	GG	CC	AA	NA	AA	CC	GT	GG	CC	AA	CC	GG	GG	CC	GG	TT	del--del--	GG	TT	TT	CC	TT	AA	CC	GG	TT	GG	GG	CC	TC	GG	AA	AA
652	Mora Romagnola	CT	GG	GG	TT	AA	AA	GG	CT	AA	NA	AA	CC	GG	GG	CC	GA	CC	GG	GA	CT	GG	TT	del--del--	GG	TT	CT	CC	NA	AA	CC	GG	TT	GG	GG	CC	TC	GG	AA	AA
653	Mora Romagnola	TT	GG	NA	TT	AC	AA	GG	CC	AA	GG	AA	CC	GG	GG	CC	GA	CC	GG	GG	CC	GG	TT	del--del--	GG	TT	TT	CC	TT	AA	CC	GG	TT	GG	GG	CC	TC	GG	AA	AA
654	Mora Romagnola	TT	GG	GG	TT	AA	AA	GG	CT	AA	NA	AA	CC	GG	AG	CC	AA	CC	GG	GG	CC	GG	TT	del--del--	GG	TT	CT	CC	TT	AC	CC	GG	TT	GG	GG	CC	CC	GG	AA	AA
655	Mora Romagnola	TT	GG	GG	TT	AA	GA	GG	CC	AA	GA	AA	TC	GT	AG	CC	AA	CC	GG	GA	CT	GG	TT	del--del--	GA	TC	CC	CC	TT	AA	CC	GG	AA	GG	GA	CC	CC	TG	AA	AA
656	Mora Romagnola	TT	AA	NA	GT	AA	GA	GG	TT	AA	GG	AA	CC	TT	GG	CC	GA	CC	GG	AA	TT	GG	TT	del--del--	GG	TT	CC	CC	TT	NA	CC	GG	TA	GG	GG	CC	CC	GG	AA	AA
657	Mora Romagnola	TT	GG	GG	TT	AA	AA	GG	CT	AA	GA	AT	CC	GG	GG	CC	GA	CC	GG	GA	CT	GG	TT	del--del--	GG	TT	TT	CC	TT	AC	CC	GG	TT	GG	GG	CC	TC	GG	AA	AA
658	Mora Romagnola	CC	GG	GG	GT	AC	GA	GG	CT	AA	NA	TT	TC	TT	AG	CC	AA	CC	GG	GA	CT	GG	TT	del--del--	GA	TT	CC	CC	TT	AA	CC	GG	TT	GG	GA	CC	CC	GG	AA	AA
659	Mora Romagnola	CC	GG	GG	TT	AC	AA	GT	CT	AA	NA	AT	CC	GT	AG	CC	GA	CC	GG	GA	CT	GG	TT	del--del--	GA	TT	CT	CC	TT	AA	CC	GG	TT	GG	GG	CC	CC	GG	AA	AA
660	Mora Romagnola	CT	GG	GA	GT	AA	AA	GG	TT	AA	AA	AA	CC	GT	GG	CC	AA	CC	GG	GA	CT	GG	TT	del--del--	GG	TT	CT	CC	TT	AC	CC	GG	TA	GG	GG	CC	CC	GG	AA	AA
661	Mora Romagnola	CT	GG	GG	TT	AA	AA	GG	CT	AA	NA	AA	CC	GG	GG	CC	GA	CC	GG	AA	TT	GG	TT	del--del--	GA	TT	CT	CC	TT	AA	CC	GG	TT	GG	GG	CC	CC	GG	AA	AA
662	Mora Romagnola	CT	GG	GG	TT	AA	AA	GG	CT	AA	NA	AA	CC	GG	GG	CC	AA	CC	GG	GA	CT	GG	TT	del--del--	GA	TT	CT	CC	TT	AA	CC	GG	TA	GG	GG	CC	TC	GG	AA	NA
663	Mora Romagnola	CT	GG	GG	TT	AA	AA	GT	CC	AA	NA	AA	TC	GT	AG	CC	AA	CC	GG	GA	CT	GG	TT	del--del--	GA	TT	CT	CC	TT	AA	CC	GG	TA	GG	GG	CC	TC	GG	AA	AA
664	Mora Romagnola	TT	GG	GG	TT	AA	GG	GG	CT	AA	NA	AA	CC	TT	AG	CC	AA	CT	GG	GA	CT	GG	TT	del--del--	GG	TT	CT	CC	TT	AA	CC	GG	TA	GG	GA	CC	TC	GG	AA	AA
665	Mora Romagnola	CT	AA	GA	TT	AA	AA	GT	CC	AA	NA	AA	TC	GT	AG	CC	GA	CC	GG	GG	CC	GG	TT	del--del--	GA	TT	CT	CC	NA	AA	CC	GG	TA	GG	GG	CC	CC	GG	AA	AA
666	Mora Romagnola	CT	GG	GG	TT	AA	GA	GG	CC	AA	GA	AT	CC	GT	GG	CC	GG	CC	GG	AA	TT	GG	TT	del--del--	GG	TT	CC	CC	TT	NA	CC	GG	TT	GG	GG	CC	TC	GG	AA	AA
667	Mora Romagnola	CC	GG	GA	TT	AC	AA	GG	CT	AA	GA	AT	CC	GT	GG	CC	AA	CC	GG	AA	TT	GG	TT	del--del--	GA	TT	CT	CC	TT	AA	CC	GG	TA	GG	GG	CC	TC	GG	AA	AA
668	Moravka	CC	GG	GA	GT	AA	AA	GT	CT	AA	NA	TT	CC	GG	AA	CT	GG	CT	GA	GG	CC	GA	TC	insCCdel--	GA	TT	TT	CG	TT	AC	NA	GG	TA	GG	GG	CC	TT	GG	AA	AA
669	Moravka	TT	GG	GG	GT	AC	GG	GT	CT	AA	NA	TT	CC	GG	NA	CC	GA	NA	GA	GG	CC	GA	TC	insCCdel--	GA	TT	TT	CG	TT	NA	CC	GG	TT	GG	GG	CC	TT	GG	AA	NA
670	Moravka	CT	GG	GG	GG	AC	GG	GT	CT	AA	NA	AT	CC	GG	AG	CT	GG	CC	GA	GG	CC	GA	TC	del--del--	AA	TC	TT	CC	TT	AA	CC	GG	TT	GG	GA	CC	TT	GG	AA	AA
671	Moravka	CC	GG	GG	TT	AA	GG	GG	CC	AA	GA	AA	TC	GG	GG	CT	AA	CC	GG	GG	CC	GA	TT	del--del--	GA	TC	CC	CG	TT	AA	CC	GG	TT	GG	AA	TC	TC	GG	AA	AA
672	Moravka	CT	GA	GG	GT	CC	GA	GT	CT	AA	NA	AA	CC	GT	AA	CC	GG	CC	AA	NA	CC	GG	CC	del--del--	GA	TC	TT	CC	TT	AC	NA	GG	TA	GG	GG	CC	TC	GG	AA	AG
673	Moravka	CT	GA	GG	GG	CC	NA	GG	TT	AA	NA	AT	CC	GG	GG	CT	GG	CC	GG	GG	CC	AA	TT	del--del--	GA	CC	CT	CC	TT	AC	CC	GG	TA	GG	GA	CC	TT	GG	AA	AA
674	Moravka	CT	GG	GG	TT	AA	GG	GG	CT	AA	GA	TT	CC	GG	GG	CC	GA	CT	GA	GG	CC	GA	TC	del--del--	AA	CC	CC	CC	TT	AA	AA	GG	TA	GG	GA	CC	TT	GG	AA	AG
675	Moravka	CC	GG	GG	GT	AC	GA	GG	CC	AA	NA	AT	CC	GG	AA	CT	GA	TT	GA	GG	CC	GA	TC	del--del--	GG	TC	TT	CG	TT	AA	NA	GG	TT	GG	GA	CC	TT	GG	AA	AG
676	Moravka	CT	AA	GG	TT	AA	GG	GG	CT	AA	GA	TT	CC	GG	GG	CC	GA	CT	AA	NA	CC	GG	CC	del--del--	AA	CC	CC	CC	TT	AA	AA	GA	TA	GG	AA	CC	TT	GG	AA	GG
677	Moravka	CT	GG	GG	GT	CC	AA	GG	TT	AA	NA	TT	TC	GG	GG	CT	AA	CC	GA	GG	CC	NA	TC	del--del--	GA	CC	CT	CC	TT	AA	CC	GG	AA	GG	GA	CC	TT	GG	AA	AA
678	Moravka	CC	GG	GG	GG	AC	NA	GG	TT	AA	AA	AT	CC	GG	GG	CC	GA	CC	GA	GG	CC	GA	TC	insCCdel--	GA	CC	CT	CC	TT	AA	CC	GG	TA	GG	GA	CC	TT	GG	AA	AA
679	Moravka	CC	AA	GG	TT	AC	GA	GG	TT	AA	NA	AT	TC	GG	GG	CC	GA	TT	GA	GG	CC	GA	TC	del--del--	GG	TC	CT	CC	TT	AA	CC	GG	TT	GG	GG	CC	TC	GG	AA	AA
680	Moravka	CT	AA	GG	GG	AC	AA	GG	CT	AA	GA	TT	CC	GG	AG	CC	GA	CC	GA	GG	CC	GA	TC	insCCdel--	GA	CC	CT	CC	TT	AA	NA	GG	TA	GG	GA	CC	CC	GG	AA	AA
681	Moravka	CT	GA	GG	GG	AC	GG	GG	CT	AA	GA	AA	CC	GG	GG	CC	GA	CT	GA	GG	CC	GA	TC	del--del--	GG	TC	CT	CC	TT	AA	CC	GG	TA	GG	GA	CC	CC	TG	AA	AA
682	Moravka	CC	AA	GG	GT	CC	GG	GG	TT	AA	NA	AT	TC	GG	GG	CC	GG	TT	GG	GG	CC	AA	TT	insCCdel--	GG	TT	TT	CC	TT	AA	CC	GG	AA	GG	GA	CC	TT	GG	AA	AA
683	Moravka	CT	GA	GG	GT	AC	AA	GG	TT	AA	GA	TT	TC	GT	AG	CT	GA	CC	GA	GG	CC	GG	TC	del--del--	GA	TC	TT	CG	TT	AC	AA	GG	AA	GG	GA	CC	TT	GG	AA	AA
684	Moravka	CT	AA	GG	GT	CC	GA	GG	CT	AA	GA	AT	TC	GT	AG	CC	GG	CC	GA	GG	CC	GA	TC	insCCdel--	GA	TC	CT	CC	TT	AC	AA	GG	TA	GG	GG	CC	TT	GG	AA	AA
685	Moravka	CT	GA	GG	GT	AC	GG	GG	TT	AA	GA	TT	CC	GG	AA	CC	GG	CC	GA	GG	CC	GA	TC	del--del--	GA	TC	CC	CC	TT	AA	AA	GG	AA	GG	GG	CC	TC	GG	AA	AA
686	Moravka	CC	GA	GG	GT	AC	GA	GG	CT	AA	GA	TT	CC	GG	GG	CC	GG	TT	GA	GG	CC	GA	TC	insCCdel--	AA	TC	TT	CC	TT	AC	CC	GG	AA	GG	GA	CC	TT	TG	AA	AA
687	Moravka	CT	GA	GA	GT	AC	GA	GG	TT	AA	AA	AT	CC	GG	AA	CC	GA	CT	GG	GG	CC	AA	TT	insCCdel--	AA	TC	CC	CC	TT	AC	CC	GG	TT	GG	AA	CC	TT	GG	AA	AA
688	Moravka	CT	GA	GA	TT	AC	GG	GG	CT	AA	GA	AA	CC	GG	AG	CT	AA	CT	GG	GG	CC	AA	TT	del--del--	GA	TC	CT	CC	TT	AA	CC	GG	AA	GG	GA	CC	TT	GG	AA	AA
689	Moravka	CT	GA	NA	TT	CC	GG	GG	CT	AA	GG	TT	CC	GG	AG	CC	GA	CC	GG	GG	CC	AA	TT	insCCdel--	GG	TC	TT	CC	TT	AC	CC	GG	TA	GG	AA	CC	TC	GG	AA	AA
690	Moravka	CC	GA	GG	GT	CC	GG	GT	CC	AA	NA	AA	CC	GG	AG	CT	GG	CC	AA	NA	CC	GG	CC	del--del--	GA	TC	CT	CC	TT	AC	NA	GG	TA	GG	GG	CC	TT	GG	AA	AG
691	Moravka	CT	GA	GA	TT	AC	GG	GG	CT	AA	NA	TT	CC	GG	GG	CC	GA	CC	GG	GG	CC	AA	TT	del--del--	AA	TT	CC	CC	TT	AC	CC	GG	TA	GG	GA	CC	TT	GG	AA	AA
692	Moravka	CT	AA	GG	GG	AC	GG	GG	TT	AA	NA	AT	CC	GG	GG	CT	GA	CT	GA	GG	CC	GA	TC	insCCdel--	GG	TT	CT	CC	TT	AA	CC	GG	TA	GG	GA	CC	TC	GG	AA	AA
693	Moravka	CC	AA	GG	GG	CC	GA	GG	TT	AA	GA	AT	TC	GT	GG	CC	GG	TT	GG	GG	CC	AA	TT	insCCdel--	GA	TC	CT	CC	TT	AA	CC	GG	AA	GG	GG	CC	TC	GG	AA	AA
694	Moravka	CT	AA	GG	GT	CC	GA	GG	TT	AA	GA	AT	TC	GT	GG	CC	GG	TT	GG	GG	CC	AA	TT	insCCdel--	GG	TC	CT	CC	TT	AA	CA	GG	AA	GG	GA	CC	TC	GG	AA	AA
695	Moravka	CC	AA	GA	GT	AC	GA	GG	TT	AA	AA	AA	CC	GG	AG	CC	GA	CT	GG	GG	CC	AA	TT	insCCdel--	GA	TC	CT	CC	TT	AC	CC	GG	AA	GG	GG	CC	TC	GG	AA	AA
696	Moravka	CT	AA	GG	TT	AC	NA	GG	CT	AA	NA	AT	CC	GT	GG	CC	AA	CT	GA	GG	CC	GG	TC	del--del--	GG	CC	CT	CC	TT	AC	CC	GG	TA	GG	AA	CC	TC	GG	AA	AA
697	Moravka	CC	GG	GG	GG	AC	GA	GG	CT	AA	GA	AA	CC	GG	GG	CC	GA	CT	GA	GG	CC	GA	TC	del--del--	GA	TC	TT	CC	TT	AC	AA	GG	TA	GG	GA	CC	TT	GG	AA	AA
698	Moravka	CC	AA	GG	GT	AC	GG	GG	TT	AA	GA	AT	CC	GG	AG	CT	GG	CT	AA	NA	CC	GG	CC	del--del--	GG	CC	CT	CG	TT	AC	CC	GG	AA	GG	GA	CC	TT	GG	AA	AA
699	Moravka	CT	GG	GG	TT	AA	GG	GG	CC	AA	GA	AT	CC	GG	AG	CC	GG	CC	GA	GG	CC	GA	TC	del--del--	AA	TC	CT	CG	TT	AA	NA	GA	TT	GG	GA	CC	TT	GG	AA	AG
700	Moravka	TT	GG	GG	TT	AC	GG	GG	TT	AA	NA	TT	CC	GG	GG	CC	GA	TT	GG	GG	CC	AA	TT	insCCdel--	AA	CC	CC	CC	TT	AA	AA	GA	TA	GG	AA	CC	TT	GG	AA	AG
701	Moravka	TT	GA	NA	TT	CC	GG	GG	CT	AA	GG	AT	CC	GT	GG	CC	GA	CT	GA	GG	CC	GA	TC	del--del--	GA	CC	CT	CG	TT	AA	AA	GG	AA	GG	AA	CC	TT	GG	AA	AA
702	Moravka	CT	GA	GG	TT	CC	GG	GG	CC	AA	NA	TT	CC	GG	AG	CT	GG	CC	AA	NA	CC	GG	NA	del--del--	GA	TC	CT	CC	TT	AA	NA	GG	TA	GG	GA	CC	TT	GG	AA	AG
703	Moravka	CT	GA	NA	GT	AC	AA	GG	CT	AA	GA	TT	CC	GG	GG	CT	GG	CT	GG	GG	CC	AA	TT	del--del--	GA	CC	CT	CG	TT	AA	CC	GG	TT	GG	GA	CC	TT	GG	AA	AG
704	Moravka	CT	GA	GA	TT	AA	GG	GG	TT	AA	GA	TT	CC	GG	GG	CC	AA	CT	GG	GG	CC	AA	TT	del--del--	GA	CC	CC	CC	TT	AA	AA	GG	TT	GG	GA	CC	TT	GG	AA	AG
705	Moravka	TT	GA	GA	TT	AA	GG	GG	CT	AA	NA	TT	CC	GG	GG	CC	GA	CT	GA	GG	CC	GA	TC	del--del--	GA	TC	CT	CC	TT	AA	CA	GG	AA	GG	GG	CC	TT	GG	AA	AG
706	Moravka	CT	GA	GA	TT	AA	GG	NA	TT	AA	NA	TT	CC	GG	GG	CT	GA	CT	GG	GG	CC	AA	TT	del--del--	GA	CC	CC	CC	TT	AA	CC	GG	TA	GG	GA	CC	TT	GG	AA	AG
707	Moravka	CT	GA	GG	TT	AC	GA	GG	CT	AA	NA	AT	CC	GG	AG	TT	GG	NA	GG	GG	CC	AA	TT	del--del--	GG	TC	TT	CG	TT	AC	NA	GG	TT	GG	GA	CC	TT	GG	AA	AA
708	Moravka	CT	GG	GG	GT	CC	GA	GG	CT	AA	AA	TT	CC	GG	GG	CT	GG	CT	GA	GG	CC	GA	TC	del--del--	GA	CC	TT	CC	TT	AC	NA	GA	TA	GG	GA	CC	TT	GG	AA	AA
709	Moravka	TT	GG	GA	TT	AC	GG	GG	CT	AA	AA	TT	CC	GG	GG	CC	GA	CC	GA	GG	CC	GA	TC	del--del--	GA	TC	CT	CC	TT	AA	CA	GG	AA	GG	GA	CC	TT	GG	AA	GG
710	Moravka	CT	GG	GA	TT	AC	GG	GG	CT	AA	NA	TT	CC	GG	GG	CT	AA	CT	GG	GG	CC	AA	TT	del--del--	GA	CC	CT	CC	TT	AA	CA	GG	TA	GG	GA	CC	TT	GG	AA	AG
711	Moravka	TT	GA	GG	TT	AC	GG	GG	TT	AA	AA	TT	CC	GG	GG	CC	GA	CC	GA	GG	CC	GA	TC	del--del--	AA	CC	CT	CC	TT	AA	AA	GG	AA	GG	GA	CC	TT	GG	AA	AG
712	Moravka	CT	GA	GG	GG	AC	AA	GG	CT	AA	NA	AT	TC	GG	GG	CC	GG	TT	GA	GG	CC	GA	TC	insCCdel--	GG	TC	TT	CG	TT	AC	CC	GA	TA	GG	GG	CC	TT	GG	AA	AA
713	Moravka	TT	GG	NA	GT	CC	GG	GG	TT	AA	NA	AT	CC	GG	GG	CC	AA	CT	GG	GG	CC	AA	TT	del--del--	GA	CC	CT	CC	TT	AC	CC	GG	AA	GG	AA	CC	TT	GG	AA	AA
714	Moravka	CT	GA	GG	GG	CC	GA	GG	TT	AA	NA	AT	CC	GG	AG	CT	GG	TT	GA	GG	CC	GA	TC	insCCdel--	GG	TT	TT	CC	TT	AC	CC	GG	TA	GG	GG	CC	TT	GG	AA	AA
715	Moravka	CT	GA	NA	GG	AC	GA	GG	CC	AA	GA	AT	CC	GG	AG	CT	GA	TT	GA	GG	CC	GA	TC	del--del--	GG	TC	CT	CC	TT	CC	CA	GA	TT	GG	AA	TC	TT	GG	AA	AA
716	Nero Siciliano	CT	GG	GG	GT	AC	GG	GG	CT	AA	GA	TT	TC	GG	GG	CC	GG	CC	GG	GG	CC	AA	TT	insCCdel--	GG	TC	CT	CC	TT	CC	NA	GA	TA	GG	GA	CC	TC	GG	AA	AA
717	Nero Siciliano	CC	GA	GG	TT	CC	GA	GT	TT	AA	NA	TT	CC	GG	GG	CC	GA	CC	GG	GG	CC	AA	TT	del--del--	GG	TC	CT	CG	TT	CC	CC	GG	TT	GG	GG	CC	TT	TG	AA	AA
718	Nero Siciliano	NA	NA	NA	NA	NA	NA	NA	NA	NA	NA	NA	NA	NA	NA	NA	NA	NA	NA	NA	NA	NA	NA	NA	NA	NA	NA	NA	NA	NA	NA	NA	NA	NA	NA	NA	NA	NA	NA	NA
719	Nero Siciliano	CT	GG	GG	GT	AC	GA	GG	TT	AA	NA	TT	CC	GG	AG	CC	GG	CT	GG	GG	CC	AA	TT	del--del--	GG	TC	CT	CC	TT	AA	NA	NA	AA	GG	GG	CC	TT	GG	AA	AA
720	Nero Siciliano	NA	NA	NA	NA	NA	NA	NA	NA	NA	NA	NA	NA	NA	NA	NA	NA	NA	NA	NA	NA	NA	NA	NA	NA	NA	NA	NA	NA	NA	NA	NA	NA	NA	NA	NA	NA	NA	NA	NA
721	Nero Siciliano	CC	GA	GG	GT	AC	GA	GT	CT	AA	NA	TT	TC	GT	AG	CC	GA	CC	GG	GG	CC	AA	TT	del--del--	GG	TC	CT	CG	TT	AA	CC	GA	AA	GG	GG	CC	TT	TG	AA	AA
722	Nero Siciliano	NA	GA	GG	TT	CC	GG	GG	TT	AA	GA	AT	TC	GT	AG	CC	GG	CC	GG	GG	NA	AA	TT	insCCdel--	GA	TT	CC	CC	TT	NA	CC	NA	TT	GG	GA	CC	TT	GG	AA	AA
723	Nero Siciliano	NA	NA	NA	NA	AA	GA	GG	CT	AA	NA	AA	NA	GG	GG	NA	GA	NA	GG	NA	NA	AA	NA	del--del--	NA	NA	TT	CG	TT	NA	CC	GG	TT	NA	NA	NA	TT	GG	AA	AA
724	Nero Siciliano	CT	AA	NA	GT	CC	AA	GG	CT	AA	NA	AT	CC	GG	GG	CC	GG	CT	GA	GG	CC	GA	TC	insCCdel--	GA	TC	TT	CC	TT	AA	CC	GG	TA	GG	GG	CC	TT	GG	AA	AA
725	Nero Siciliano	NA	NA	NA	NA	AC	GA	GG	CC	AA	NA	AT	NA	GG	GG	NA	GG	NA	GG	NA	NA	AA	NA	del--del--	GG	NA	TT	CG	TT	AC	NA	GG	TT	NA	NA	CC	TT	GG	AA	NA
726	Nero Siciliano	CC	AA	GG	TT	NA	NA	NA	NA	NA	GA	NA	NA	NA	NA	CC	NA	CC	NA	GG	NA	NA	TT	NA	NA	TT	NA	NA	NA	NA	NA	NA	NA	NA	GG	CC	NA	NA	NA	NA
727	Nero Siciliano	CC	NA	GG	NA	AA	GA	GG	CT	AA	GA	AT	CC	GT	GG	CC	GA	CC	GG	GG	CC	AA	NA	insCCdel--	GG	NA	CT	CC	TC	AC	CC	GG	TT	GG	GG	CC	TT	GG	AA	AA
728	Nero Siciliano	CC	GA	NA	GT	AC	GG	GG	TT	AA	GG	AT	CC	GG	GG	CC	AA	CC	GG	GG	CC	AA	TT	insCCdel--	GA	CC	TT	CC	TC	AC	CC	GG	TT	GG	GG	CC	TT	GG	AA	AA
729	Nero Siciliano	CC	GA	GG	GT	AA	GG	GT	CC	AA	GA	TT	CC	GG	GG	CC	GG	CC	GA	GG	CC	GA	TC	del--del--	GG	TT	TT	CC	TT	AC	CA	GG	TT	GG	GG	CC	TT	GG	AA	AA
730	Nero Siciliano	CT	AA	GG	TT	CC	AA	GG	TT	AA	GA	TT	CC	GG	GG	CC	AA	CC	GG	GG	CC	AA	TT	del--del--	GG	TC	CT	CC	TC	AC	NA	GG	AA	GG	GG	CC	TT	GG	AA	NA
731	Nero Siciliano	TT	GG	GG	TT	AC	AA	GT	CC	AA	AA	TT	CC	GG	GG	CC	GG	CC	GG	GG	CC	AA	TT	del--del--	GA	TC	CT	CC	TC	AC	CC	GG	AA	GG	GG	CC	TT	GG	AA	AA
732	Nero Siciliano	CT	AA	GG	TT	AC	GA	GG	CC	AA	AA	TT	CC	GG	GG	CC	GG	CC	GG	GG	CC	AA	TT	del--del--	AA	TT	CC	CC	TT	AC	NA	GG	TA	GG	GG	CC	TT	TG	AA	AA
733	Nero Siciliano	CT	GG	GG	GT	AC	GA	GG	TT	AA	NA	AT	CC	GG	AG	CC	GG	CC	GG	GG	CC	AA	TT	del--del--	GG	TC	CC	CG	TT	AA	NA	GG	AA	GG	GG	CC	TC	TG	AA	AA
734	Nero Siciliano	CT	GG	GG	TT	AC	GA	TT	CT	AA	AA	TT	CC	GG	GG	CC	GA	CC	GG	GG	CC	AA	TT	del--del--	AA	TC	CC	CG	TT	AC	CC	GG	TA	GG	GG	CC	TT	TG	AA	AA
735	Nero Siciliano	CT	GA	GG	TT	AC	GA	GG	CC	AA	AA	TT	CC	GG	GG	CC	GG	CC	GG	GG	CC	AA	TT	insCCdel--	AA	TT	CC	CG	TT	AA	CC	GG	AA	GG	GG	CC	TC	TT	AA	AA
736	Nero Siciliano	CT	GG	GG	GT	CC	GG	GG	CT	AA	NA	AT	CC	GT	GG	CC	GA	CC	GG	GG	CC	AA	TT	insCCdel--	GA	CC	CT	CC	TT	AC	CC	NA	TA	GG	GG	CC	TT	GG	AA	AA
737	Nero Siciliano	TT	GA	GG	GT	AC	GG	GG	CC	AA	NA	AT	CC	GT	GG	CC	GA	CC	GG	GG	CC	AA	TT	insCCinsCC	GA	TC	TT	CC	TC	AC	CC	GG	TT	GG	GA	CC	TT	TG	AA	AA
738	Nero Siciliano	TT	GG	GG	GT	AA	AA	GG	CC	AA	GA	AT	TC	TT	GG	CC	GA	CC	GG	NA	CT	GA	TT	del--del--	GA	TT	TT	CC	CC	NA	CC	GG	TT	GG	GG	CC	TT	TG	AA	AA
739	Nero Siciliano	TT	GG	GG	TT	AA	GA	GG	CC	AA	GA	AA	TC	GG	GG	CC	GA	CC	GG	GG	CC	AA	TT	insCCdel--	GG	TC	TT	CC	CC	AA	CC	GG	TT	GG	AA	CC	TT	TG	AA	AA
740	Nero Siciliano	NA	GG	GG	TT	AA	GA	GG	CC	AA	NA	AT	TC	GG	GG	CC	AA	CC	GG	GA	NA	GA	TT	del--del--	GA	CC	TT	CC	CC	AC	CC	GG	TT	NA	NA	TC	TT	GG	AA	AA
741	Nero Siciliano	NA	NA	NA	NA	NA	NA	NA	NA	NA	NA	NA	NA	NA	NA	NA	NA	NA	NA	NA	NA	NA	NA	NA	NA	NA	NA	NA	NA	NA	NA	NA	NA	NA	NA	NA	NA	NA	NA	NA
742	Nero Siciliano	TT	GG	GG	GT	CC	GG	GG	TT	AA	GA	AA	CC	GG	GG	CC	GA	CC	GG	GG	CC	AA	TT	insCCdel--	GA	TC	CC	CC	CC	CC	CC	GG	TT	GG	GA	CC	TT	GG	AA	AA
743	Nero Siciliano	CC	GG	GG	GT	CC	AA	GG	CC	AA	GA	AT	TC	GG	AG	CC	NA	CC	GA	GG	CC	GA	TC	del--del--	GG	TT	CC	CC	TT	AC	CC	GG	AA	GG	GG	CC	TT	GG	AA	AA
744	Nero Siciliano	NA	NA	NA	NA	NA	NA	NA	NA	NA	NA	NA	NA	NA	NA	NA	NA	NA	NA	NA	NA	NA	NA	NA	NA	NA	NA	NA	NA	NA	NA	NA	NA	NA	NA	NA	NA	NA	NA	NA
745	Nero Siciliano	CT	GA	GG	GT	CC	GA	GG	CT	AA	NA	AT	CC	GG	AG	CT	GA	CC	GG	GG	CC	AA	TT	del--del--	GA	TC	TT	CC	TC	AC	CC	NA	TA	GG	GG	CC	TT	TG	AA	AA
746	Nero Siciliano	NA	NA	NA	NA	AA	GA	GG	CC	AA	NA	AA	NA	GG	AA	NA	GG	NA	GG	NA	NA	AA	NA	del--del--	GG	NA	TT	CC	TT	AA	CC	GG	TT	NA	NA	CC	TT	GG	AA	AA
747	Nero Siciliano	CC	AA	GG	GT	CC	AA	GG	CT	AA	AA	AT	CC	GT	AA	CC	AA	CT	GG	GG	CC	AA	TT	del--del--	GA	TC	CT	CG	TT	AA	CC	NA	AA	GG	GG	CC	TT	GG	AA	AA
748	Nero Siciliano	CT	GG	GG	TT	AC	AA	GG	CT	AA	AA	TT	CC	GG	GG	CC	AA	CC	GG	GG	CC	AA	TT	del--del--	AA	CC	CT	CC	TT	AA	NA	GG	TT	GG	GG	CC	TT	GG	AA	AA
749	Nero Siciliano	CT	GA	GG	TT	AC	GG	GG	CT	AA	AA	TT	CC	GT	AG	CC	AA	CC	GG	GG	CC	AA	TT	del--del--	GA	CC	CT	CC	TT	AC	CC	GG	TA	GG	GG	CC	TT	GG	AA	AA
750	Nero Siciliano	CT	GG	GG	TT	AA	AA	GG	TT	AA	GA	AT	CC	GG	GG	CC	AA	CC	GG	GG	CC	AA	TT	del--del--	AA	TC	CT	CC	NA	AA	CC	GG	TT	GG	GG	CC	TT	TG	AA	AA
751	Nero Siciliano	CT	GA	GG	TT	AC	GG	GG	CC	AA	GA	TT	CC	GG	AG	CC	AA	CC	GG	GG	CC	AA	TT	del--del--	GA	CC	CC	CG	TT	NA	CC	GG	TA	GG	GG	CC	TT	GG	AA	AA
752	Nero Siciliano	CT	GG	GG	TT	AA	GA	GT	CT	AA	GA	TT	CC	GG	AG	CC	GA	TT	GG	GG	CC	AA	TT	del--del--	GA	CC	CT	CC	TT	AC	CC	GG	TA	GG	GG	CC	TT	GG	AA	AA
753	Nero Siciliano	CC	GA	GG	GT	AC	GG	GG	CT	AA	GA	AT	CC	GG	AG	CC	GG	CC	GG	GG	CC	AA	TT	del--del--	GA	CC	CT	CC	TT	CC	CC	GG	AA	GG	GG	CC	TT	GG	AA	AA
754	Nero Siciliano	CC	GG	NA	GT	AA	GA	GG	CT	AA	GG	AA	CC	GG	AG	CC	GA	CC	GG	NA	CC	AA	TT	insCCdel--	GG	TC	CC	CC	TC	AA	CC	GG	TA	GG	GG	CC	TT	GG	AA	NA
755	Nero Siciliano	CC	GG	GG	TT	NA	NA	NA	NA	NA	GA	NA	TC	NA	NA	CC	NA	CT	NA	GG	CC	NA	TT	NA	NA	TC	NA	NA	NA	NA	NA	NA	NA	GG	GA	CC	NA	NA	NA	NA
756	Nero Siciliano	TT	AA	GG	TT	AC	GA	GG	CT	AA	NA	AT	CC	GG	GG	CC	AA	CC	GG	GG	CC	AA	TT	del--del--	GG	CC	CT	CC	TT	AC	CC	GA	TT	GG	GA	CC	TT	GG	AA	AA
757	Nero Siciliano	TT	GA	GG	GT	AC	AA	GG	CT	AA	NA	AA	CC	GT	GG	CC	AA	CT	GG	GG	CC	GA	TT	del--del--	GG	CC	CT	CC	CC	CC	CC	GG	TA	GG	GG	CC	TT	GG	AA	AG
758	Nero Siciliano	NA	GG	AA	TT	CC	AA	GG	CC	AA	GA	TT	CC	GT	GG	CC	GA	NA	GG	NA	NA	AA	TT	del--del--	AA	TT	CT	CC	TC	CC	CC	GG	TT	NA	GG	CC	TT	GG	AA	AA
759	Nero Siciliano	CC	GG	GA	TT	AC	GA	GG	TT	AA	AA	AT	CC	GT	GG	CC	GA	CC	GG	GG	CC	AA	TT	insCCdel--	GG	TT	CT	CC	TC	CC	CC	GG	TT	GG	GG	CC	TT	GG	AA	AA
760	Nero Siciliano	CT	GG	GA	GT	AC	GG	GG	CT	AA	AA	AT	CC	GG	GG	CC	GG	CT	GG	GG	CC	AA	TT	insCCdel--	GA	TC	TT	CC	TC	AC	NA	GG	TA	GG	GG	CC	CC	TG	AA	AA
761	Nero Siciliano	CT	GG	GG	TT	AC	AA	GG	TT	AA	AA	AT	TC	GT	AG	CC	GG	CC	GG	GG	CC	AA	TT	del--del--	GA	TC	CT	CC	TC	CC	CC	GG	TA	GG	GA	CC	TT	TG	AA	AA
762	Sarda	CC	GG	GG	GG	AC	GG	GG	TT	AA	GA	AT	TC	TT	GG	CT	AA	CC	GG	GG	CC	AA	TT	insCCinsCC	GG	TT	CT	CG	TT	AC	CA	GG	TA	GG	GA	CC	TC	TT	AA	AA
763	Sarda	CC	GA	NA	GT	AC	GG	GG	TT	AA	GG	AA	TC	GG	GG	CT	AA	TT	GG	GG	CC	AA	TT	del--del--	GG	CC	TT	CC	TT	AC	CC	GG	TT	GG	GG	CC	TT	TT	AA	AA
764	Sarda	CC	GA	GG	GT	AA	GA	GG	CC	AA	NA	TT	CC	GG	AA	CC	GA	CC	GG	GG	CC	AA	TT	insCCinsCC	GG	TC	CT	CC	TT	AC	AA	GG	TA	GG	GG	CC	TT	TG	AA	AA
765	Sarda	CT	GA	GG	GT	AC	GG	GG	CC	AA	GA	AT	CC	GG	AG	CC	GA	TT	GG	GG	CC	AA	TT	insCCdel--	GG	CC	CT	CC	TT	CC	CA	GG	TT	GG	GG	CC	TT	TG	AA	AA
766	Sarda	CC	GA	GG	GG	CC	AA	GG	CT	AA	GA	AA	CC	GG	AG	CC	GA	TT	GA	GG	CC	GA	TC	insCCdel--	GA	TT	CT	CG	TT	AC	AA	GG	AA	GG	GG	CC	TT	GG	AA	AA
767	Sarda	CT	AA	GA	GG	AC	NA	GG	CT	AA	GA	AT	CC	GG	GG	CC	AA	CC	GG	GG	CC	AA	TT	insCCinsCC	AA	TT	TT	CC	TT	AC	CC	GG	AA	GG	GA	CC	TT	GG	AA	AA
768	Sarda	TT	GG	GG	GT	AC	GG	GG	CC	AA	GG	AT	TC	GG	GG	CC	GA	CC	GG	GG	CC	AA	TT	insCCdel--	AA	TT	CC	CG	TT	AC	CC	GG	AA	GG	GA	CC	TT	GG	AA	AA
769	Sarda	CT	GG	GA	GT	AC	GG	GG	TT	AA	NA	AT	TC	GG	GG	CC	GG	CC	GG	GG	CC	AA	TT	insCCdel--	AA	TT	TT	CG	TT	AC	CC	GG	AA	GG	GA	CC	TT	TG	AA	AA
770	Sarda	CT	GG	GA	GT	AC	GG	GG	CT	AA	GA	AT	TC	GG	GG	CC	GG	CT	GG	GG	CC	AA	TT	insCCdel--	AA	TT	CC	CC	TT	AA	CC	GG	AA	GG	GA	CC	TC	GG	AA	AA
771	Sarda	CC	GG	GG	GG	AC	GA	GG	CC	AA	NA	AT	TC	TT	AG	CT	GA	CT	GG	GG	CC	AA	TT	insCCinsCC	GG	TC	CT	CC	TT	AC	CA	GG	TA	GG	GA	TC	TT	TG	AA	AA
772	Sarda	CC	AA	GG	GT	AA	AA	GT	CC	AA	NA	AT	TT	GT	AG	CC	GA	TT	GG	GG	CC	AA	TT	insCCinsCC	GA	TC	TT	CG	TT	AC	NA	NA	TA	GG	GG	TT	TT	TG	AA	AA
773	Sarda	CC	GG	GG	GT	AC	NA	GG	CC	AA	NA	AA	TC	TT	AG	CC	GG	CT	GG	GG	CC	AA	TT	insCCinsCC	GG	TC	TT	CC	TT	AA	AA	GG	TA	GG	GA	CC	TT	TG	AA	AA
774	Sarda	CT	AA	GA	TT	AC	GA	GG	CT	AA	NA	AT	TC	TT	AG	CC	GG	TT	GG	GA	CT	GG	TT	del--del--	GA	TC	CT	GG	TT	CC	NA	GG	TA	GG	GG	TC	TT	GG	AA	AA
775	Sarda	CC	GG	GG	GG	CC	AA	GT	TT	AA	GA	AT	TC	GG	GG	CC	GG	CT	GG	GG	CC	AA	TT	del--del--	GA	TT	CT	CC	TT	AC	NA	GG	TA	GG	GA	CC	TT	TG	AA	AA
776	Sarda	CC	GG	GG	GT	AC	GG	GT	CT	AA	GA	AT	CC	GG	GG	CC	GA	CT	GG	GG	CC	AA	TT	insCCdel--	GG	TT	CT	CG	TT	AA	NA	GG	TT	GG	GG	CC	TT	TG	AA	AA
777	Sarda	CT	GA	GG	GT	CC	GG	GT	CT	AA	GA	AT	TC	GG	GG	CC	GA	TT	GG	GG	CC	AA	TT	insCCdel--	GG	TT	TT	CC	TT	AA	AA	GG	TT	GG	GG	CC	TT	TG	AA	AA
778	Sarda	CT	GG	GG	GG	CC	GA	GT	TT	AA	GA	AT	TC	GG	GG	CC	AA	CT	GG	GG	CC	AA	TT	insCCdel--	GG	TT	TT	CC	TT	CC	NA	GG	TT	GG	GG	CC	TT	GG	AA	AA
779	Sarda	CC	AA	GG	GT	AA	GA	GT	CT	AA	NA	TT	CC	GG	AA	TT	AA	TT	GG	GG	CC	AA	TT	insCCdel--	GA	TT	TT	CC	TT	AA	AA	GG	TT	GG	AA	CC	TT	TT	AA	AA
780	Sarda	CT	GA	NA	GT	CC	GG	GG	CT	AA	GG	TT	CC	GG	AG	CC	AA	CT	GG	GG	CC	AA	TT	insCCinsCC	GG	TT	CC	CC	TT	AC	AA	GG	TT	GG	GG	CC	TT	GG	AA	AA
781	Sarda	CC	AA	GG	GT	AA	GA	GG	CC	AA	NA	TT	CC	GG	AA	CT	AA	TT	GG	GG	CC	AA	TT	insCCinsCC	GA	TT	TT	CC	TT	AA	CC	GG	TT	GG	AA	CC	TT	TT	AA	AA
782	Sarda	CT	AA	NA	TT	CC	GA	GT	CC	AA	GG	TT	CC	GG	AG	CT	AA	TT	GG	GG	CC	AA	TT	insCCdel--	GA	TT	CT	CG	TT	AC	AA	GG	TT	GG	GG	CC	TT	GG	AA	AA
783	Sarda	CT	GG	GG	GT	AC	GG	GG	CC	AA	GA	TT	CC	GG	AG	CC	GG	TT	GG	GG	CC	AA	TT	insCCinsCC	GA	TT	CT	CC	TT	AA	CC	GG	TT	GG	GA	CC	CC	GG	AA	AA
784	Sarda	TT	GA	GG	GG	AC	GG	GT	CT	AA	NA	AT	CC	GG	AG	CT	GG	CT	GG	GG	CC	AA	TT	insCCinsCC	GG	NA	CT	CG	TT	AC	CC	GG	NA	GG	GG	CC	TC	TT	AA	AA
785	Sarda	CC	AA	GG	GT	AC	NA	GT	CC	AA	GA	AT	CC	GT	AG	CC	GA	CT	GG	GG	CC	AA	TT	insCCdel--	GG	TC	TT	CC	TT	AA	NA	GG	AA	GG	GA	CC	TT	GG	AA	AA
786	Sarda	CC	GG	GG	GT	AC	GG	GG	CC	AA	NA	AT	CC	GG	AG	CC	GG	CC	GG	GG	CC	AA	TT	insCCinsCC	GA	TT	TT	CC	TT	AA	NA	GG	AA	GG	GA	CC	TT	GG	AA	AA
787	Sarda	CT	AA	GG	GG	AA	NA	GG	CT	AA	NA	AT	CC	GG	AG	CT	GA	CT	GG	GG	CC	AA	TT	insCCdel--	GG	TT	TT	CG	TT	AA	CC	GG	AA	GG	GA	CC	TT	TG	AA	AA
788	Sarda	CT	GG	NA	TT	AC	GA	GG	CC	AA	NA	TT	CC	GG	AG	CC	GG	CC	GG	GG	CC	AA	TT	insCCinsCC	GG	TC	CT	CG	TT	AA	CC	GG	TT	GG	GA	CC	TT	GG	AA	AA
789	Sarda	CC	GG	GG	GT	CC	GG	GG	CT	AA	GA	TT	TC	GG	AG	CC	GG	CT	GG	GG	CC	AA	TT	insCCinsCC	GG	TC	CT	CG	TT	AA	NA	GG	TT	GG	GG	TC	TC	GG	AA	AG
790	Sarda	TT	GG	GG	GT	AC	GA	GT	CC	AA	GA	TT	CC	GG	GG	CC	AA	TT	GG	GG	CC	AA	TT	insCCinsCC	GG	TC	CT	CC	TT	AA	AA	GG	TA	GG	GG	CC	TT	TG	AA	AA
791	Sarda	TT	GG	NA	GT	AA	GA	GT	CT	AA	NA	TT	CC	GG	GG	CC	AA	TT	GG	GG	CC	AA	TT	insCCinsCC	GG	TT	CT	CG	TT	AC	AA	GG	TA	GG	GG	CC	TT	TG	AA	AA
792	Sarda	CT	GG	GG	TT	AC	GG	GG	TT	AA	GA	TT	CC	GG	GG	CC	AA	CC	GG	GG	CC	AA	TT	insCCinsCC	GA	TT	TT	CC	TT	AC	AA	GG	TT	GG	GG	CC	TT	GG	AA	AA
793	Sarda	CT	GG	GG	TT	AC	GA	GG	TT	AA	GA	TT	CC	GG	GG	CC	AA	CT	GG	GA	CT	GA	TT	insCCdel--	AA	TC	CC	GG	TT	CC	CC	GG	TA	GG	GG	CC	TT	GG	AA	AA
794	Sarda	CC	GG	GG	GT	AC	GA	GT	CT	AA	GA	TT	CC	GG	GG	CC	AA	CT	GG	GG	CC	AA	TT	insCCinsCC	GA	TT	CT	CG	TT	AC	CA	GG	TT	GG	GA	CC	TT	GG	AA	AA
795	Sarda	CT	GG	GA	GT	CC	GA	GT	CC	AA	GA	AT	CC	GT	GG	CC	GA	TT	GA	GG	CC	GA	TC	insCCdel--	GG	TT	CC	CG	TT	CC	CC	GG	TT	GG	AA	CC	TT	GG	AA	AA
796	Sarda	CC	GA	GA	GT	CC	GG	GG	CC	AA	GA	AT	CC	TT	GG	CC	AA	TT	GG	GG	CC	AA	TT	insCCdel--	GA	TT	TT	CG	TC	AC	CC	GA	TT	GG	GA	CC	TT	GG	AA	AA
797	Sarda	CT	AA	GG	TT	CC	GA	GT	CT	AA	GA	AT	CC	TT	GG	CC	GA	CT	GG	GA	CT	GA	TT	del--del--	GA	TC	TT	CC	TT	CC	CC	GG	AA	GG	AA	CC	TT	GG	AA	AA
798	Sarda	CC	GA	GG	GG	CC	NA	GG	CT	AA	GA	AA	CC	GT	AA	CC	GA	TT	GA	GG	CC	GA	TC	insCCdel--	GA	TT	CT	CG	TT	AC	CC	GA	TA	GG	GA	CC	TT	GG	AA	AA
799	Sarda	CC	AA	GG	TT	CC	GG	GT	CT	AA	GA	AT	CC	TT	GG	CC	GA	CC	GG	GG	CC	AA	TT	insCCdel--	GA	TT	TT	CG	TT	CC	CC	GG	TA	GG	GA	CC	TT	GG	AA	AA
800	Sarda	CT	GG	GG	GT	AA	GA	GG	CC	AA	GA	AT	TC	GT	GG	CC	GG	TT	GG	GG	CC	AA	TT	insCCinsCC	GA	TT	CC	CC	TC	AA	NA	GG	TT	GG	AA	CC	TT	GG	AA	AA
801	Sarda	CT	GG	GG	GT	AC	GA	GG	CT	AA	GA	AA	CC	GT	GG	CT	GA	CT	GG	GG	CC	AA	TT	insCCdel--	GA	TT	CC	CC	TT	AC	NA	GG	TT	GG	AA	CC	TT	TG	AA	AA
802	Sarda	CT	GG	GG	GT	AC	GA	GG	CC	AA	GA	AT	CC	GT	GG	TT	GA	TT	GG	GG	CC	AA	TT	insCCdel--	GA	TC	TT	CC	TT	AC	NA	GG	TT	GG	GG	CC	TT	TG	AA	AA
803	Sarda	TT	GA	GG	TT	AA	NA	GG	CC	AA	GA	AT	TC	GT	GG	CC	GG	TT	GG	GG	CC	AA	TT	insCCinsCC	GA	TT	CT	CC	TT	AC	NA	GG	TA	GG	AA	CC	TT	GG	AA	AA
804	Sarda	CT	GA	GG	GT	AA	NA	GG	CC	AA	NA	AT	TC	TT	GG	CC	GG	CT	GG	GG	CC	AA	TT	insCCinsCC	AA	TC	CT	CC	TT	CC	CC	GG	TA	GG	GA	CC	TT	GG	AA	AA
805	Sarda	CT	GA	GA	TT	AA	GG	GG	CC	AA	NA	AT	NA	GG	AG	CC	AA	TT	GG	GG	NA	AA	TT	insCCdel--	GA	TT	CT	CG	TT	AC	AA	GG	TT	GG	AA	CC	TT	GG	AA	AA
806	Sarda	CT	GA	GG	TT	CC	GG	GT	CC	AA	GG	TT	CC	GG	GG	CC	AA	TT	GG	GG	CC	AA	TT	del--del--	GA	TT	TT	CC	TT	AC	NA	GG	TT	GG	AA	CC	TT	TG	AA	AA
807	Sarda	CT	GG	GG	TT	AC	GA	GG	CC	AA	GA	TT	CC	GG	AG	CC	AA	TT	GG	GG	CC	AA	TT	insCCdel--	AA	TT	TT	CC	TT	AC	AA	GG	TT	GG	GG	CC	TT	TG	AA	AA
808	Sarda	CC	GG	GG	GT	AC	GA	GG	TT	AA	GA	TT	CC	GT	GG	CT	GG	TT	GA	GG	CC	GA	TC	insCCdel--	GG	CC	CT	CC	TT	CC	NA	GG	TA	GG	GA	CC	TT	TG	AA	AA
809	Schwabisch Hallisches Schwein	TT	GG	GA	GG	AC	GA	GG	CC	AA	AA	AT	TC	GG	GG	CT	AA	CC	GG	GG	CC	AA	TT	del--del--	GA	TT	TT	CG	TT	CC	CC	GG	AA	GG	GA	CC	TT	GG	AA	AA
810	Schwabisch Hallisches Schwein	TT	GG	GG	GG	CC	GA	GG	CT	AA	NA	AA	TC	GG	GG	CT	GA	CC	GG	GG	CC	AA	TT	del--del--	GA	TC	CT	CC	TT	AA	CC	GG	TA	GG	GG	CC	TC	TG	AA	AA
811	Schwabisch Hallisches Schwein	CT	GG	GA	GT	AC	GA	GG	CC	AA	GA	AA	TC	GT	GG	CC	GG	CC	AA	NA	CC	GG	CC	del--del--	AA	TT	TT	CC	TT	NA	CC	GG	TT	GG	GA	CC	TT	TG	AA	AA
812	Schwabisch Hallisches Schwein	CC	GG	GG	GT	AC	GA	GG	CT	AA	NA	AA	TC	GG	AA	CC	GG	CC	GG	GG	CC	AA	TT	del--del--	GG	TC	CT	CC	TT	AC	CC	GA	TA	GG	GA	CC	TT	GG	AA	AA
813	Schwabisch Hallisches Schwein	CT	GG	NA	GG	AC	NA	GG	CT	AA	NA	AT	TC	GG	AA	CC	GG	CT	GA	GG	CC	GA	TC	del--del--	GA	CC	TT	CC	TT	AC	NA	GG	TA	GG	AA	CC	TT	GG	AA	AA
814	Schwabisch Hallisches Schwein	CT	GG	GG	GG	AC	NA	GG	CT	AA	NA	AT	TC	GG	AA	CC	GG	CT	GA	GG	CC	GA	TC	del--del--	GA	CC	TT	CC	TT	AC	NA	GG	TA	GG	AA	CC	TT	GG	AA	AA
815	Schwabisch Hallisches Schwein	TT	GG	GG	TT	AC	GA	GG	CC	AA	NA	AT	TC	GG	AG	CC	GG	CT	GG	GG	CC	AA	TT	del--del--	GA	TC	CT	GG	TT	AC	NA	GA	TT	GG	GG	CC	TC	GG	AA	AA
816	Schwabisch Hallisches Schwein	CC	GG	GA	GT	CC	GA	GG	CC	AA	NA	AA	CC	GG	AG	CC	GA	CC	GG	GG	CC	AA	TT	del--del--	GG	TC	TT	CC	TT	AA	CC	GG	TA	GG	GA	CC	TC	TG	AA	AA
817	Schwabisch Hallisches Schwein	CC	GA	GG	GT	CC	AA	GG	CC	AA	AA	AA	TC	GG	AG	CC	GA	CC	GG	GG	CC	AA	TT	del--del--	GG	TT	CT	CC	TT	AC	NA	GG	AA	GG	GA	CC	TT	GG	AA	AA
818	Schwabisch Hallisches Schwein	CC	GG	GA	GT	CC	AA	GG	CC	AA	AA	AA	CC	GG	AG	CC	NA	CC	GG	GG	CC	AA	TT	del--del--	GA	TC	TT	CG	NA	AC	CC	GG	TA	GG	GA	CC	TC	TG	AA	AA
819	Schwabisch Hallisches Schwein	CT	GG	GG	GT	CC	AA	GG	CC	AA	GA	AA	TC	GG	GG	CT	GA	CC	GA	GG	CC	GA	TC	del--del--	GA	TC	CT	CC	TT	AA	CC	GG	TA	GG	AA	CC	TC	GG	AA	AA
820	Schwabisch Hallisches Schwein	CT	GG	GG	GG	AC	GG	GG	NA	AA	NA	TT	TC	GG	AA	CC	GA	CC	GG	GG	CC	AA	TT	del--del--	GG	TC	TT	CC	TT	CC	NA	GG	AA	GG	GA	CC	TT	GG	AA	AA
821	Schwabisch Hallisches Schwein	CT	GG	GG	GT	AC	GG	GG	CT	AA	GA	AA	TC	GG	AG	CT	GG	CC	GA	GG	CC	GA	TC	del--del--	GA	TC	CT	CG	TT	CC	NA	GG	TA	GG	GG	CC	TC	GG	AA	AA
822	Schwabisch Hallisches Schwein	CT	AA	GG	TT	AC	GA	GG	CC	AA	NA	AA	TT	GG	GG	CC	GA	CC	GG	GG	CC	AA	TT	del--del--	GG	TT	CT	CC	TT	CC	NA	GG	TA	GG	GA	CC	TC	GG	AA	AA
823	Schwabisch Hallisches Schwein	TT	GG	GG	TT	CC	GG	GG	CC	AA	GA	AT	TC	GG	GG	CT	GA	CC	GG	GG	CC	AA	TT	del--del--	GG	CC	TT	CC	TT	CC	NA	GG	TA	GG	GG	CC	TT	GG	AA	AA
824	Schwabisch Hallisches Schwein	TT	GG	GG	GT	CC	GA	GG	CC	AA	NA	AA	CC	GT	AG	CC	GA	CC	GG	GG	CC	AA	TT	del--del--	GG	TC	TT	GG	TT	CC	NA	GG	TT	GG	GA	CC	TT	GG	AA	AA
825	Schwabisch Hallisches Schwein	CT	GG	GG	TT	CC	GG	GG	CT	AA	NA	AA	CC	GG	GG	CT	GA	CC	GA	GG	CC	GA	TC	del--del--	GA	TT	TT	GG	TT	CC	CC	GG	TA	GG	GA	CC	TT	GG	AA	AA
826	Schwabisch Hallisches Schwein	CT	GG	GA	GT	CC	GG	GG	CC	AA	GA	AT	CC	GG	GG	CC	GG	CC	GA	GG	CC	GA	TC	del--del--	GA	CC	TT	CC	TT	CC	NA	GG	TA	GG	GA	CC	TT	GG	AA	AA
827	Schwabisch Hallisches Schwein	TT	GG	GG	GG	CC	GG	GG	CC	AA	NA	AT	CC	GG	AA	CC	GA	CC	GG	GG	CC	AA	TT	del--del--	GG	CC	TT	CC	TT	CC	NA	GG	AA	GG	AA	CC	TT	GG	AA	AA
828	Schwabisch Hallisches Schwein	CT	GG	GG	TT	CC	GG	GG	CT	AA	AA	AA	TC	GG	AA	CC	GA	CC	GG	GG	CC	AA	TT	del--del--	GG	TC	TT	CG	TT	CC	CC	GA	TA	GG	GA	CC	TT	GG	AA	AA
829	Schwabisch Hallisches Schwein	CC	AA	GG	TT	AA	GG	GG	CC	AA	AA	AT	TT	GG	GG	CC	GG	CC	GG	GG	CC	AA	TT	del--del--	GG	TT	TT	CG	TT	CC	CC	NA	TA	GG	GA	CC	TC	GG	AA	AA
830	Schwabisch Hallisches Schwein	CC	GG	GA	GT	AC	GG	GG	TT	AA	NA	AA	TC	GG	AG	CC	GA	CC	GG	GG	CC	AA	TT	del--del--	GG	TC	TT	CC	TT	CC	NA	GG	AA	GG	GA	CC	TT	GG	AA	AA
831	Schwabisch Hallisches Schwein	TT	GG	NA	TT	AC	GG	GG	CC	AA	GG	TT	CC	GG	AG	CT	GA	CC	GG	GG	CC	AA	TT	del--del--	GA	CC	TT	CC	TT	AC	NA	GG	TA	GG	GA	CC	TT	GG	AA	AA
832	Schwabisch Hallisches Schwein	CT	GA	GG	GT	CC	GA	GG	CT	AA	GA	AA	TC	GG	AG	CC	GA	CT	GG	GG	CC	AA	TT	del--del--	GA	TC	CT	CG	TT	NA	NA	GG	TT	GG	GG	CC	TC	GG	AA	AA
833	Schwabisch Hallisches Schwein	CC	GA	GG	TT	AC	GA	GG	CC	AA	AA	AT	TC	GG	GG	CT	GG	CC	GG	GG	CC	AA	TT	del--del--	GA	TC	CC	CC	TT	AC	NA	GG	TT	GG	GA	CC	TT	GG	AA	AA
834	Schwabisch Hallisches Schwein	CT	GG	GG	GT	AC	NA	GG	CT	AA	GA	AT	TC	GG	GG	CT	GA	CC	GA	GG	CC	GA	TC	del--del--	AA	CC	TT	CC	TT	CC	NA	GG	AA	GG	GA	CC	TT	GG	AA	AA
835	Schwabisch Hallisches Schwein	CT	GG	GG	GT	AC	GG	GG	CT	AA	NA	AT	TC	GG	AG	CC	GG	CC	GG	GG	CC	AA	TT	del--del--	GA	TC	TT	CG	TT	CC	CC	GA	TT	GG	GG	CC	TT	GG	AA	AA
836	Schwabisch Hallisches Schwein	TT	GG	GG	TT	CC	GG	GG	CT	AA	AA	AT	CC	GT	AG	CT	GA	CC	GG	GG	CC	AA	TT	del--del--	GA	CC	TT	CG	TT	AC	NA	GG	AA	GG	GG	CC	TT	GG	AA	AA
837	Schwabisch Hallisches Schwein	TT	GG	GG	GG	CC	NA	GG	CC	AA	NA	AA	CC	GG	AG	CC	GA	CC	GA	GG	CC	GA	TC	del--del--	GG	TC	TT	CC	TT	CC	CC	GG	TA	GG	GA	CC	TT	GG	AA	AA
838	Schwabisch Hallisches Schwein	CT	GG	GG	GG	AC	GG	GG	CC	AA	GA	AT	TC	GG	AA	CT	GA	CC	GG	GG	CC	AA	TT	del--del--	GG	TC	TT	CG	TT	CC	NA	GG	TT	GG	GG	CC	TT	GG	AA	AA
839	Schwabisch Hallisches Schwein	CT	GG	GG	GG	AC	GG	GG	CT	AA	AA	AA	TT	GG	AG	CC	GG	CC	AA	NA	CC	GG	CC	del--del--	GA	TC	TT	CG	TT	CC	NA	GG	AA	GG	GA	CC	TT	TG	AA	AA
840	Schwabisch Hallisches Schwein	TT	GG	GG	GG	CC	GG	GG	CC	AA	GA	AA	CC	GG	AA	CC	GG	CC	GG	GG	CC	AA	TT	del--del--	GG	TC	TT	CG	TT	CC	CC	GG	TA	GG	GA	CC	TT	TG	AA	AA
841	Schwabisch Hallisches Schwein	CC	GG	GG	GT	CC	GG	GG	CC	AA	AA	AA	TC	GG	AA	CC	GA	CC	GG	GG	CC	AA	TT	del--del--	GA	TC	TT	CC	TT	AC	CC	GG	TA	GG	GA	CC	TT	GG	AA	AA
842	Schwabisch Hallisches Schwein	TT	GG	GG	TT	CC	GG	GG	CT	AA	AA	AA	CC	GG	AA	CC	AA	CC	GG	GG	CC	AA	TT	del--del--	GG	CC	TT	CC	TT	CC	CC	GG	TA	GG	GA	CC	TT	GG	AA	AA
843	Schwabisch Hallisches Schwein	TT	GG	GG	GG	CC	GG	GG	CC	AA	NA	AT	CC	GG	AA	CC	GA	CC	GG	GG	CC	AA	TT	del--del--	GG	CC	TT	CC	TT	NA	NA	GG	AA	GG	AA	CC	TT	GG	AA	AA
844	Schwabisch Hallisches Schwein	CT	GG	GG	GT	CC	GG	GG	CC	AA	GA	AT	CC	GT	GG	CT	GA	CC	GA	GG	CC	GA	TC	del--del--	AA	CC	TT	CC	TT	CC	CC	GG	TT	GG	GG	CC	TT	GG	AA	AA
845	Schwabisch Hallisches Schwein	CT	AA	GG	TT	AA	GG	GG	CC	AA	AA	AA	TT	GG	AG	CT	GG	CC	GG	GG	CC	AA	TT	del--del--	GG	TC	CT	CG	TT	AC	NA	GG	TT	GG	GA	CC	TT	GG	AA	AA
846	Schwabisch Hallisches Schwein	TT	AA	GG	GT	CC	GG	GG	CT	AA	NA	AT	TC	GG	AA	CC	GA	CC	GG	GG	CC	AA	TT	del--del--	GG	TC	TT	CG	TT	CC	NA	GG	AA	GG	GA	CC	TT	GG	AA	AA
847	Schwabisch Hallisches Schwein	CC	GG	GG	GT	CC	NA	GG	CC	AA	NA	AA	TC	GG	AG	CC	GG	CC	GG	GG	CC	AA	TT	del--del--	GG	TC	TT	CC	TT	AA	NA	GG	AA	GG	GG	CC	TT	GG	AA	AA
848	Schwabisch Hallisches Schwein	CC	GG	GG	GT	CC	NA	GG	CT	AA	NA	AA	TC	GG	AA	CC	AA	CC	GG	GG	CC	AA	TT	del--del--	GG	TC	TT	CG	TT	AC	NA	GG	AA	GG	GG	CC	TT	GG	AA	AA
849	Schwabisch Hallisches Schwein	CT	GG	GG	GT	CC	GG	GG	CT	AA	GA	AA	CC	GG	AA	CC	GA	CC	GG	GG	CC	AA	TT	del--del--	GG	TC	TT	CC	TT	AC	NA	GG	AA	GG	GA	CC	TC	GG	AA	AA
850	Schwabisch Hallisches Schwein	CC	GG	GG	GG	CC	GA	GG	CC	AA	GA	TT	TC	GG	AG	CC	NA	CC	GG	GG	CC	AA	TT	del--del--	GA	TC	TT	GG	TT	AA	NA	GG	TT	GG	GA	CC	TT	TG	AA	AA
851	Schwabisch Hallisches Schwein	TT	GG	GA	GG	CC	GG	GG	CC	AA	NA	AA	TC	GG	AG	CC	GA	CT	GG	GG	CC	AA	TT	del--del--	GA	CC	TT	CC	NA	AA	NA	GG	AA	GG	GG	CC	TC	NA	AA	AA
852	Schwabisch Hallisches Schwein	TT	GG	GG	GT	AC	GG	GG	CT	AA	NA	AA	TC	GG	NA	CC	GA	CC	GG	GG	CC	AA	TT	del--del--	NA	TC	NA	CC	TT	AC	NA	GG	TA	GG	GG	CC	TT	GG	AA	AA
853	Schwabisch Hallisches Schwein	CC	GG	GG	TT	AC	GG	GG	CC	AA	GA	AT	TC	GG	GG	CT	GG	CC	GA	GG	CC	GA	TC	del--del--	GA	CC	TT	CC	TT	CC	NA	GG	TA	GG	GG	CC	TT	GG	AA	AA
854	Schwabisch Hallisches Schwein	CT	GG	GG	TT	AA	NA	GG	CC	AA	AA	AT	TT	GG	GG	CT	GG	NA	GA	GG	CC	GA	TC	del--del--	GA	TC	TT	CC	TT	AC	NA	GG	TT	GG	GA	CC	TT	GG	AA	AA
855	Schwabisch Hallisches Schwein	CC	GG	GG	GT	AC	GG	GG	CC	AA	NA	AA	TC	GG	AG	CT	AA	CC	GG	GG	CC	AA	TT	del--del--	GA	TC	CT	CG	TT	CC	NA	GG	TA	GG	GG	CC	TT	TG	AA	AA
856	Schwabisch Hallisches Schwein	TT	GG	GG	GT	CC	GG	GG	CC	AA	AA	AA	TC	GG	AG	CC	GG	CC	GG	GG	CC	AA	TT	del--del--	GG	TC	TT	CC	TT	AC	NA	GG	TA	GG	GA	CC	TT	GG	AA	AA
857	Swallow Bellied Mangalitsa	CT	GA	GG	GT	AA	NA	GG	CC	AA	GA	AA	TC	GT	GG	CT	GA	CC	GG	GG	CC	GG	TT	del--del--	GG	TC	TT	CC	TT	AA	NA	GG	TT	GG	AA	CC	TT	TG	AA	AA
858	Swallow Bellied Mangalitsa	CC	AA	GG	GT	AC	GG	GG	CC	AA	GA	TT	CC	GG	GG	CT	AA	CT	GG	GG	CC	GG	TT	del--del--	GG	CC	TT	CC	TT	AA	NA	GG	TT	GG	GA	CC	TT	TG	AA	AA
859	Swallow Bellied Mangalitsa	TT	GA	NA	GT	AA	GG	GG	CT	AA	NA	AT	CC	GG	GG	TT	AA	CT	GG	GG	CC	GG	TT	del--del--	GG	TC	TT	CG	TT	AA	CC	GG	TA	GG	AA	CC	TT	GG	AA	AA
860	Swallow Bellied Mangalitsa	CC	GG	GG	TT	AC	NA	GG	CC	AA	GA	AT	TT	GG	GG	TT	AA	CC	GG	GG	CC	GG	TT	del--del--	GG	TC	CT	CC	TT	AA	CC	GG	TA	GG	AA	CC	TT	TG	AA	AA
861	Swallow Bellied Mangalitsa	CT	AA	NA	TT	AA	GG	GG	CC	AA	GG	AT	CC	GG	GG	TT	AA	CC	GG	GG	CC	GG	TT	del--del--	GG	TC	TT	CC	TT	AA	NA	GG	TT	GG	GG	CC	TT	GG	AA	AA
862	Swallow Bellied Mangalitsa	CC	AA	NA	TT	AC	GG	GG	CC	AA	GG	AT	TC	GG	GG	TT	AA	CT	GG	GG	CC	GG	TT	del--del--	GG	TT	TT	CG	TT	AA	CC	GG	TT	GG	GA	CC	TC	TG	AA	AA
863	Swallow Bellied Mangalitsa	CC	GG	NA	TT	AA	GG	GG	CC	AA	GG	TT	CC	GG	GG	CT	AA	CC	GG	GG	CC	GG	TT	del--del--	GG	CC	CC	CC	TC	AA	CC	GA	AA	GG	GG	CC	TT	GG	AA	AA
864	Swallow Bellied Mangalitsa	CC	AA	GG	TT	AC	AA	GT	CC	AA	GA	AT	TC	GT	GG	TT	AA	CC	GG	GG	CC	GG	TT	del--del--	GG	CC	CT	CC	TT	AA	CC	GA	TT	GG	AA	CC	TT	TG	AA	AA
865	Swallow Bellied Mangalitsa	CT	AA	GG	TT	AA	GG	GG	CC	AA	GA	AA	TC	GT	GG	TT	AA	CC	GG	GG	CC	GG	TT	del--del--	GA	TC	CT	CC	TT	AA	CC	GG	TT	GG	AA	CC	TT	TG	AA	AA
866	Swallow Bellied Mangalitsa	TT	GG	GG	TT	AA	NA	GG	CC	AA	GA	AA	TT	GG	GG	CT	AA	CT	GG	GG	CC	GG	TT	del--del--	GG	TC	TT	CC	TT	AA	CC	GG	TT	GG	GA	CC	TT	GG	AA	AA
867	Swallow Bellied Mangalitsa	CT	AA	NA	TT	AA	GG	GG	CT	AA	NA	AT	TC	GT	GG	CT	AA	CC	GG	GG	CC	GG	TT	del--del--	GG	TC	TT	CC	TT	AA	CC	GG	TT	GG	AA	CC	TT	GG	AA	AA
868	Swallow Bellied Mangalitsa	CC	GA	GG	GT	AA	GG	GG	CC	AA	GA	TT	TC	GG	GG	CC	AA	CC	GG	GG	CC	GG	TT	del--del--	GG	TT	TT	CC	TT	AA	NA	GG	TA	GG	AA	CC	TC	TT	AA	AA
869	Swallow Bellied Mangalitsa	CT	AA	GG	GT	CC	GG	GG	CC	AA	GA	AT	TC	GG	GG	TT	AA	CC	GG	GG	CC	GG	TT	del--del--	GG	TT	CT	CG	TT	AA	CC	GG	TT	GG	GA	CC	TT	TG	AA	AA
870	Swallow Bellied Mangalitsa	CC	GG	GG	GT	AA	GG	GG	CC	AA	GA	TT	TC	GT	GG	CT	AA	CC	GG	GG	CC	GG	TT	del--del--	GG	TT	CT	GG	TT	AA	CC	GG	TA	GG	AA	CC	TC	TG	AA	AA
871	Swallow Bellied Mangalitsa	CC	GA	GG	TT	AA	GG	GG	CC	AA	GA	AT	TC	GG	GG	TT	AA	CC	GG	GG	CC	GG	TT	del--del--	GG	TT	TT	CG	TT	AA	CC	GG	TT	GG	GA	CC	TT	TG	AA	AA
872	Swallow Bellied Mangalitsa	CC	AA	GG	TT	AC	NA	GG	CC	AA	GA	TT	CC	GG	GG	TT	AA	CC	GG	GG	CC	GG	TT	del--del--	GG	TC	TT	CG	TT	AA	NA	GG	TA	GG	AA	CC	TT	GG	AA	AA
873	Swallow Bellied Mangalitsa	CC	GG	GG	GT	AC	GG	GG	CC	AA	NA	TT	CC	GG	GG	TT	AA	CT	GG	GG	CC	GG	TT	del--del--	GG	TC	TT	CC	TC	AA	CC	GG	TA	GG	GA	CC	TT	GG	AA	AA
874	Swallow Bellied Mangalitsa	CT	GG	GG	TT	AA	AA	GG	CC	AA	NA	TT	CC	GT	GG	TT	AA	CC	GG	GG	CC	GG	TT	del--del--	GG	TC	TT	CG	TT	AA	CC	GG	TA	GG	AA	CC	TT	GG	AA	AA
875	Swallow Bellied Mangalitsa	CC	GG	GG	TT	AC	GG	GG	CC	AA	NA	AT	CC	GG	GG	TT	AA	TT	GG	GG	CC	GG	TT	del--del--	GG	TC	TT	CG	TT	AA	CC	GG	AA	GG	AA	CC	TT	GG	AA	AA
876	Swallow Bellied Mangalitsa	CC	GA	GG	TT	AA	GG	GG	CC	AA	GA	TT	CC	GT	GG	TT	AA	CC	GG	GG	CC	GG	TT	del--del--	GA	TC	TT	CC	TT	AA	CC	GG	AA	GG	AA	CC	TT	GG	AA	AA
877	Swallow Bellied Mangalitsa	CT	AA	GG	TT	AA	NA	GG	CC	AA	NA	AT	TC	GG	GG	TT	AA	TT	GG	GG	CC	GG	TT	del--del--	GG	CC	CT	CG	TT	AA	CC	GG	AA	GG	AA	CC	TT	GG	AA	AA
878	Swallow Bellied Mangalitsa	CC	GG	GG	TT	AA	NA	GG	CC	AA	NA	TT	CC	GT	GG	CT	AA	CC	GG	GG	CC	GG	TT	del--del--	GG	TT	TT	CC	TT	AA	CC	GG	TA	GG	AA	CC	TT	GG	AA	AA
879	Swallow Bellied Mangalitsa	CC	GG	GG	TT	AA	NA	GG	CC	AA	NA	AA	CC	GG	GG	TT	AA	CC	GG	GG	CC	GG	TT	del--del--	GG	TT	TT	CC	TT	AA	CC	GG	TA	GG	AA	CC	TT	GG	AA	AA
880	Swallow Bellied Mangalitsa	CC	GG	GG	TT	AC	NA	GG	CC	AA	NA	AT	CC	GT	GG	CT	AA	CC	GG	GG	CC	GG	TT	del--del--	GG	TC	TT	CC	TT	AA	CC	GG	TA	GG	AA	CC	TT	GG	AA	AA
881	Swallow Bellied Mangalitsa	CC	GA	GG	TT	AA	NA	GG	CC	AA	GA	AT	CC	GG	GG	TT	AA	CT	GG	GG	CC	GG	TT	del--del--	GG	CC	CT	CG	TT	AA	CC	GG	AA	GG	AA	CC	TT	GG	AA	AA
882	Swallow Bellied Mangalitsa	CC	GG	GG	GT	AC	GG	GG	CT	AA	GA	AT	CC	GG	GG	CT	AA	CT	GG	GG	CC	GG	TT	del--del--	GG	TC	CT	CC	TT	AA	CC	GG	AA	GG	GA	CC	TT	GG	AA	AA
883	Swallow Bellied Mangalitsa	CC	AA	GG	GT	AA	NA	GG	CC	AA	NA	TT	CC	GT	GG	TT	AA	CC	GG	GG	CC	GG	TT	del--del--	GG	CC	CT	CG	TT	AA	CC	GG	TA	GG	AA	CC	TT	GG	AA	AA
884	Swallow Bellied Mangalitsa	CT	GA	NA	TT	AC	NA	GG	CC	AA	GG	AT	CC	GT	GG	TT	AA	TT	GG	GG	CC	GG	TT	del--del--	GG	TC	TT	CG	TT	AA	CC	GG	TA	GG	AA	CC	TT	GG	AA	AA
885	Swallow Bellied Mangalitsa	CC	GG	GG	GT	AA	NA	GG	CC	AA	GA	AA	CC	GT	GG	TT	AA	CT	GG	GG	CC	GG	TT	del--del--	GA	CC	TT	CC	TT	AA	CC	GG	TT	GG	AA	CC	TT	GG	AA	AA
886	Swallow Bellied Mangalitsa	CT	GA	GG	TT	AC	AA	GG	CC	AA	NA	TT	CC	GT	GG	TT	AA	TT	GG	GG	CC	GG	TT	del--del--	GG	TC	TT	CC	TT	AA	CC	GG	TA	GG	AA	CC	TT	GG	AA	AA
887	Swallow Bellied Mangalitsa	CC	GG	NA	GT	AC	NA	GG	CC	AA	GG	AT	CC	GT	GG	CT	AA	CT	GG	GG	CC	GG	TT	del--del--	GG	TC	TT	CC	TT	AA	CC	GG	TA	GG	AA	CC	TT	GG	AA	AA
888	Swallow Bellied Mangalitsa	CC	GG	GG	TT	AA	NA	GG	CC	AA	NA	AT	TC	GT	GG	TT	AA	CT	GG	GG	CC	GG	TT	del--del--	GG	TC	TT	CC	TT	AA	CC	GG	TT	GG	AA	CC	TT	GG	AA	AA
889	Swallow Bellied Mangalitsa	CC	GG	GG	TT	AA	NA	GG	CC	AA	NA	AT	CC	TT	GG	TT	AA	CT	GG	GG	CC	GG	TT	del--del--	GG	TC	TT	CC	TT	AA	CC	GG	TT	GG	AA	CC	TT	GG	AA	AA
890	Swallow Bellied Mangalitsa	CC	AA	GG	GT	AA	GG	GG	CC	AA	NA	TT	CC	GT	GG	TT	AA	CC	GG	GG	CC	GG	TT	del--del--	GA	CC	TT	CG	TT	AA	CC	GG	TA	GG	AA	CC	TT	GG	AA	AA
891	Swallow Bellied Mangalitsa	CC	GA	GG	TT	AA	GG	GG	CC	AA	NA	TT	CC	GT	GG	TT	AA	CT	GG	GG	CC	GG	TT	del--del--	GG	TC	TT	CC	TT	AA	CC	GG	TT	GG	AA	CC	TT	GG	AA	AA
892	Swallow Bellied Mangalitsa	CT	AA	GG	TT	AC	GG	GG	CC	AA	GA	AA	TC	GT	GG	TT	AA	CC	GG	GG	CC	GG	TT	del--del--	GG	TC	CT	CG	TT	AA	NA	GG	TA	GG	GA	CC	TT	TG	AA	AA
893	Swallow Bellied Mangalitsa	CT	AA	GG	TT	AA	NA	GG	CT	AA	GA	AA	TC	GT	GG	CT	AA	CC	GG	GG	CC	GG	TT	del--del--	GG	TC	CT	CC	TT	AA	CC	GG	TA	GG	GA	CC	TT	TG	AA	AA
894	Swallow Bellied Mangalitsa	CT	GG	GG	TT	AC	NA	GG	CC	AA	GA	AT	CC	GT	GG	CT	AA	CC	GG	GG	CC	GG	TT	del--del--	GG	TC	CT	CG	TT	AA	CC	GG	TT	GG	AA	CC	TT	GG	AA	AA
895	Swallow Bellied Mangalitsa	CC	GG	GG	TT	AA	GG	GG	CT	AA	GA	TT	CC	GG	GG	TT	GA	CT	GG	GG	CC	GG	TT	del--del--	GA	TC	CT	CC	TT	AA	CC	NA	TT	GG	AA	CC	TT	TG	AA	AA
896	Swallow Bellied Mangalitsa	CC	GG	NA	GT	AA	NA	GG	CT	AA	GG	TT	TC	GG	GG	CT	AA	CC	GG	GG	CC	GG	TT	del--del--	GG	TC	TT	GG	TT	AA	CC	GG	TT	GG	AA	CC	TT	TG	AA	AA
897	Swallow Bellied Mangalitsa	CT	GG	GG	TT	AA	GG	GG	CT	AA	GA	TT	CC	GG	GG	TT	AA	CT	GG	GG	CC	GG	TT	del--del--	GA	TC	CT	CC	TT	AA	CC	GA	TA	GG	AA	CC	TT	TG	AA	AA
898	Swallow Bellied Mangalitsa	CC	GG	GG	GG	AA	GA	GG	CT	AA	NA	AT	TT	GG	GG	CC	AA	CT	GG	GG	CC	GG	TT	del--del--	GG	TC	CT	GG	TT	AA	CC	GG	TA	GG	AA	CC	TT	GG	AA	AA
899	Swallow Bellied Mangalitsa	CT	GG	GG	TT	AC	GG	GG	CC	AA	NA	TT	CC	GG	GG	TT	AA	CC	GG	GG	CC	GG	TT	del--del--	GA	TT	TT	CC	TT	AA	CC	GG	AA	GG	AA	CC	TT	GG	AA	AA
900	Swallow Bellied Mangalitsa	CT	GG	GG	GT	AC	GG	GG	CC	AA	AA	TT	CC	GG	GG	TT	AA	CC	GG	GG	CC	GG	TT	del--del--	GG	TC	TT	CC	TT	AA	CC	AA	AA	GG	AA	CC	TT	GG	AA	AA
901	Swallow Bellied Mangalitsa	NA	GG	GG	GT	NA	NA	NA	NA	NA	AA	NA	CC	NA	NA	CT	NA	CC	NA	GG	CC	NA	TT	NA	NA	TC	NA	NA	NA	NA	NA	NA	NA	GG	AA	CC	NA	NA	NA	NA
902	Swallow Bellied Mangalitsa	CT	GG	GG	TT	AC	GG	GG	CC	AA	GA	AT	CC	GG	GG	CT	AA	CC	GG	GG	CC	GG	TT	del--del--	GG	TC	TT	CC	TT	AA	CC	AA	AA	GG	AA	CC	TT	GG	AA	AA
903	Swallow Bellied Mangalitsa	CT	GG	GG	GT	AC	GG	GG	CC	AA	GA	TT	CC	GG	GG	TT	AA	CC	GG	GG	CC	GG	TT	del--del--	GG	TC	CT	CC	TT	AA	CC	NA	AA	GG	AA	CC	TT	GG	AA	AA
904	Swallow Bellied Mangalitsa	CT	GG	GG	GT	AC	GG	GG	CT	AA	NA	AT	CC	GG	GG	CT	NA	CC	GG	GG	CC	GG	TT	del--del--	GG	CC	TT	CC	TT	AA	CC	GG	AA	GG	GA	CC	TT	GG	AA	AA
905	Turopolje	CT	GA	GG	TT	CC	GG	GG	TT	AA	GA	AA	TC	GG	GG	CC	GA	CC	GG	GG	CC	AA	TT	insCCinsCC	GG	TC	TT	CG	TT	CC	CC	GG	AA	GG	GA	CC	TT	GG	AA	AA
906	Turopolje	NA	NA	NA	NA	CC	GA	GG	CT	AA	NA	AT	NA	GG	GG	NA	GG	NA	GG	NA	NA	AA	NA	insCCinsCC	GG	NA	CT	CG	TC	CC	CC	GG	AA	NA	NA	CC	TT	GG	AA	AA
907	Turopolje	NA	NA	NA	NA	CC	GA	GG	TT	AA	NA	AA	NA	GT	GG	NA	GA	NA	GG	NA	NA	AA	NA	insCCinsCC	GG	NA	CC	CG	TT	CC	CC	GG	AA	NA	NA	CC	TT	GG	AA	AA
908	Turopolje	TT	GA	GG	TT	CC	GA	GG	CT	AA	GA	AA	TC	GT	GG	CC	GA	CC	GG	GG	CC	AA	TT	insCCinsCC	GG	TT	TT	CC	TC	CC	CC	GG	AA	GG	AA	CC	TT	GG	AA	AA
909	Turopolje	CC	GA	GG	TT	CC	GG	GG	CT	AA	GA	AA	TT	GG	GG	CC	AA	CC	GG	GG	CC	AA	TT	insCCinsCC	GG	TC	TT	CG	TC	CC	CC	GG	AA	GG	AA	CC	TT	GG	AA	AA
910	Turopolje	TT	GG	GG	GG	CC	GA	GG	TT	AA	AA	AA	TT	GG	GG	CC	GA	CC	GG	GG	CC	AA	TT	insCCinsCC	GG	TC	CC	CG	CC	CC	CC	GG	AA	GG	GA	CC	TT	GG	AA	AA
911	Turopolje	TT	GG	GG	GT	CC	GA	GG	CT	AA	GA	AA	TT	GG	GG	CC	AA	CC	GG	GG	CC	AA	TT	insCCinsCC	GG	TC	CT	CG	TT	CC	CC	GG	AA	GG	GA	CC	TT	GG	AA	AA
912	Turopolje	CT	GA	GG	GG	CC	NA	GG	CT	AA	AA	AA	TC	GG	GG	CC	GA	CC	GG	GG	CC	AA	TT	insCCinsCC	GG	TT	TT	CG	TC	CC	CC	GG	AA	GG	AA	CC	TT	GG	AA	AA
913	Turopolje	CT	GA	GG	TT	CC	GA	GG	CT	AA	GA	AA	TC	GG	GG	CC	GA	CC	GG	GG	CC	AA	TT	insCCinsCC	GG	TC	CT	CG	TC	CC	CC	GG	AA	GG	AA	CC	TT	GG	AA	AA
914	Turopolje	TT	GG	GG	GT	CC	GG	GG	NA	AA	GA	AA	TC	GG	GG	CC	AA	CC	GG	GG	CC	AA	TT	insCCinsCC	GG	TC	CT	CC	TT	CC	CC	NA	AA	GG	GA	CC	TT	GG	AA	AA
915	Turopolje	TT	GA	GG	GT	CC	GG	GG	TT	AA	GA	AA	TC	GT	GG	CC	NA	CC	GG	GG	CC	AA	TT	insCCinsCC	GG	TC	CT	CG	TC	CC	CC	GA	AA	GG	GA	CC	TT	GG	AA	AA
916	Turopolje	CT	GG	NA	GT	CC	GG	GG	TT	AA	GG	AA	TC	GG	NA	CC	AA	CC	GG	GG	CC	AA	TT	insCCinsCC	GG	TC	TT	CC	TC	CC	CC	GG	AA	GG	GA	CC	TT	GG	AA	NA
917	Turopolje	TT	GG	GG	GT	CC	GG	GG	TT	AA	GA	AA	TT	GG	GG	CC	AA	CC	GG	GG	CC	AA	TT	insCCinsCC	GG	TT	CT	CG	TC	CC	CC	GG	AA	GG	AA	CC	TT	GG	AA	AA
918	Turopolje	TT	GG	GG	GT	CC	GA	GG	CT	AA	GA	AA	TT	GG	GG	CC	GA	CC	GG	GG	CC	AA	TT	insCCinsCC	GG	TT	TT	CC	CC	CC	CC	GG	AA	GG	GA	CC	TT	GG	AA	AA
919	Turopolje	TT	GA	GG	GT	CC	GA	GG	TT	AA	GA	AA	TT	GT	GG	CC	GA	CC	GG	GG	CC	AA	TT	insCCinsCC	GA	TC	TT	CG	TC	CC	CC	GG	NA	GG	GA	CC	TT	GG	AA	AA
920	Turopolje	CT	GG	NA	GT	CC	GG	GG	TT	AA	GG	AA	TC	GG	GG	CC	GA	CC	GG	GG	CC	AA	TT	insCCinsCC	GA	TT	CC	CC	TT	CC	CC	GG	AA	GG	AA	CC	TT	GG	AA	AA
921	Turopolje	CT	GG	GG	GT	CC	GG	GG	TT	AA	AA	AA	TT	GG	GG	CC	GA	CC	GG	GG	NA	AA	TT	insCCinsCC	GG	TT	TT	CG	TC	CC	CC	GG	AA	GG	AA	CC	TT	GG	AA	AA
922	Turopolje	CT	GA	GG	TT	CC	GG	GG	CT	AA	AA	AA	TT	GG	GG	CC	AA	CC	GG	GG	CC	AA	TT	insCCinsCC	GG	TT	CT	CG	TT	CC	CC	GG	AA	GG	AA	CC	TT	GG	AA	AA
923	Turopolje	CT	GA	GG	GT	CC	GG	GG	CT	AA	GA	AA	TT	GG	GG	CC	GA	CC	GG	GG	CC	AA	TT	insCCinsCC	GA	TT	CT	GG	TT	CC	CC	GG	AA	GG	GA	CC	TT	GG	AA	AA
924	Turopolje	TT	GA	GG	GT	CC	GA	GG	TT	AA	GA	AA	TT	GG	GG	CC	GA	CC	GG	GG	CC	AA	TT	insCCinsCC	GG	TT	CC	CG	CC	CC	CC	GG	AA	GG	AA	CC	TT	GG	AA	AA
925	Turopolje	CT	GG	NA	GT	CC	GA	GG	CT	AA	GG	AA	TT	GG	GG	CC	GA	CC	GG	GG	CC	AA	TT	insCCinsCC	GG	TT	CT	CG	TC	CC	CC	GG	AA	GG	AA	CC	TT	GG	AA	AA
926	Turopolje	NA	GA	GG	NA	CC	AA	GG	TT	AA	NA	AA	TC	GT	GG	CC	GA	CC	GG	GG	NA	AA	TT	insCCinsCC	GG	TC	CT	GG	TC	CC	CC	GG	AA	GG	GA	CC	TT	GG	AA	AA
927	Turopolje	TT	GA	GG	GT	CC	GG	GG	CT	AA	GA	AA	CC	GG	GG	CC	AA	CC	GG	GG	CC	AA	TT	insCCinsCC	GG	TC	TT	CG	TT	AC	CC	GG	AA	GG	AA	CC	TT	GG	AA	AA
928	Turopolje	TT	GG	GG	GT	CC	AA	GG	NA	AA	GA	AA	TC	GG	GG	CC	GA	CC	GG	GG	CC	AA	TT	insCCinsCC	GG	TT	CT	CG	TT	CC	CC	NA	AA	GG	AA	CC	TT	GG	AA	AA
929	Turopolje	NA	NA	NA	NA	CC	GA	GG	CT	AA	NA	AA	NA	GG	GG	NA	AA	NA	GG	NA	NA	AA	NA	insCCinsCC	GG	NA	CC	CC	TC	CC	CC	GG	AA	NA	NA	CC	TT	GG	AA	NA
930	Turopolje	CT	GA	GG	NA	CC	GA	GG	CT	AA	GA	AA	TT	GG	GG	CC	GA	CC	GG	GG	NA	NA	TT	insCCinsCC	GG	TC	CC	GG	TC	CC	CC	GG	AA	GG	GA	CC	TT	GG	AA	AA
931	Turopolje	CT	GG	NA	TT	CC	GG	GG	CT	AA	GG	AA	TT	GG	GG	CC	AA	CC	GG	GG	CC	AA	TT	insCCinsCC	GG	TT	CC	CG	CC	CC	CC	GG	AA	GG	AA	CC	TT	GG	AA	AA
932	Turopolje	TT	AA	GG	GG	CC	GG	GG	CT	AA	GA	AA	TT	NA	GG	CC	GA	CT	GG	GG	CC	AA	TT	insCCinsCC	GA	TC	TT	CC	TC	CC	CC	GG	AA	GG	AA	CC	TT	GG	AA	AA
933	Turopolje	TT	AA	GG	GG	CC	GG	GG	CT	AA	GA	AA	TT	GG	GG	CC	GA	CT	GG	GG	CC	AA	TT	insCCinsCC	GA	TC	TT	CC	TC	CC	CC	GG	AA	GG	AA	CC	TT	GG	AA	AA
934	Turopolje	CT	GG	NA	TT	CC	GG	GG	CT	AA	GG	AA	CC	GG	GG	CC	AA	CC	GG	GG	CC	AA	TT	insCCinsCC	GG	CC	CT	CC	TC	CC	CC	GG	AA	GG	GA	CC	TT	GG	AA	AA
935	Turopolje	CT	GA	GG	TT	CC	GG	GG	CT	AA	GA	AA	TC	GG	GG	CC	GA	CC	GG	GG	CC	AA	TT	insCCinsCC	GG	TC	CT	CG	CC	AC	CC	GG	AA	GG	AA	CC	TT	GG	AA	AA
936	Turopolje	CC	GG	GG	GG	CC	GG	GG	CT	AA	GA	AA	TC	GG	GG	CC	GA	CC	GG	GG	CC	AA	TT	insCCinsCC	GA	TT	CT	CC	TT	CC	CC	GG	AA	GG	AA	CC	TT	GG	AA	AA
937	Turopolje	TT	GG	GG	TT	CC	GG	GG	CT	AA	AA	AA	TT	GG	GG	CC	GA	CC	GG	GG	CC	AA	TT	insCCinsCC	GG	TC	TT	CG	TC	CC	NA	GG	AA	GG	AA	CC	TT	GG	AA	NA
938	Turopolje	TT	GA	GG	GT	CC	GG	GG	CT	AA	GA	AT	TT	GG	GG	CC	AA	CT	GG	GG	CC	AA	TT	insCCinsCC	AA	TC	TT	CC	TC	CC	CC	GG	TA	GG	AA	CC	TT	GG	AA	AA
939	Turopolje	CT	AA	GG	TT	CC	GA	GG	CT	AA	GA	AA	TT	GG	GG	CC	AA	CC	GG	GG	CC	AA	TT	insCCinsCC	GG	TT	CT	CG	CC	CC	CC	GG	AA	GG	GA	CC	TT	GG	AA	NA
940	Turopolje	TT	AA	GG	GG	CC	GG	GG	TT	AA	GA	AT	TT	GG	GG	CC	GA	CC	GG	GG	CC	AA	TT	insCCinsCC	GA	TC	CT	CC	TC	CC	CC	GG	TA	GG	AA	CC	TT	GG	AA	AA
941	Turopolje	CC	GA	NA	GT	CC	GG	GG	CT	AA	GG	AA	TC	GG	GG	CC	GA	CC	GG	GG	CC	AA	TT	insCCinsCC	GG	TC	CT	CG	TC	AC	CC	NA	AA	GG	AA	CC	TT	GG	AA	NA
942	Turopolje	TT	AA	GG	GG	CC	GG	GG	TT	AA	GA	AA	TT	GG	GG	CC	AA	CT	GG	GG	CC	AA	TT	insCCinsCC	AA	TC	CT	CC	TT	CC	CC	GG	AA	GG	AA	CC	TT	GG	AA	AA
943	Turopolje	CT	GA	GG	GT	CC	GA	GG	CC	AA	GA	AA	TT	GG	GG	CC	NA	CC	GG	GG	CC	AA	TT	insCCinsCC	GG	TT	TT	CC	TC	NA	CC	GG	AA	GG	GA	CC	TT	GG	AA	AA
944	Turopolje	TT	AA	GG	GT	CC	GG	NA	CT	AA	GA	AA	TT	GG	GG	CC	NA	CC	GG	GG	CC	AA	TT	insCCinsCC	GG	TT	TT	CC	TC	AC	CC	GG	AA	GG	AA	CC	TT	GG	AA	AA
945	Turopolje	CT	AA	GG	NA	CC	GG	GG	CT	AA	GA	AA	TC	GG	GG	CC	GA	CC	GG	GG	CC	AA	TT	insCCinsCC	GG	TT	CT	CC	TT	AC	CC	GG	AA	GG	AA	CC	TT	GG	AA	AA
946	Turopolje	TT	AA	GG	GG	CC	GA	GG	CT	AA	GA	AA	CC	GT	GG	CC	GA	CC	GG	GG	CC	AA	TT	insCCinsCC	GG	TT	TT	CG	TC	CC	CC	GG	AA	GG	GA	CC	TT	GG	AA	AA
947	Turopolje	CT	AA	GG	GT	CC	GG	GG	CT	AA	GA	AA	CC	GG	GG	CC	GA	CC	GG	GG	CC	AA	TT	insCCinsCC	GG	TT	CT	CC	TC	AC	CC	GG	AA	GG	AA	CC	TT	GG	AA	AA
948	Turopolje	CT	AA	GG	GT	CC	GG	GG	TT	AA	GA	AT	TT	GG	GG	CC	GA	CC	GG	GG	CC	AA	TT	insCCinsCC	GG	TC	CT	CC	TC	CC	CC	GG	AA	GG	AA	CC	TT	GG	AA	AA
949	Turopolje	CT	GG	GG	GT	CC	GG	GG	CT	AA	GA	AA	TC	GG	GG	CC	GA	CC	GG	GG	CC	AA	TT	insCCinsCC	GG	TC	TT	CG	TC	AC	CC	GG	AA	GG	GA	CC	TT	GG	AA	AA
950	Turopolje	TT	GG	GG	GT	CC	GA	GG	CC	AA	GA	AA	TT	GG	GG	CC	GA	CC	GG	GG	CC	AA	TT	insCCinsCC	GG	TT	TT	CC	TC	AC	CC	GG	AA	GG	GA	CC	TT	GG	AA	AA
951	Turopolje	TT	AA	GG	GT	CC	GG	GG	TT	AA	GA	AT	TT	GG	GG	CC	AA	CC	GG	GG	CC	AA	TT	insCCinsCC	GA	TC	TT	CC	TT	CC	CC	GG	TA	GG	AA	CC	TT	GG	AA	AA

## Sheet: Hoja1
255.678	1_MC1R2_255893	MC1R_255973	2_MC1R3_255980	MC1R_256101	MC1R_256337
	g. 181905G>A	g.181825T>C	g.181818G>A	g.181697C>T	g.181461G>A
insCCinsCC	GG	TT	GA	CC	GG
insCCinsCC	GG	TT	AA	CC	GG
insCCinsCC	GG	TT	AA	CC	GG
insCCinsCC	GG	TT	GA	CC	GG
insCCdel--	GG	TT	AA	CC	GG
insCCinsCC	GG	TT	AA	CC	GG
del--del--	GG	TT	AA	CC	GG
insCCinsCC	GG	TT	AA	CC	GG
insCCdel--	GG	TT	AA	CC	GG
insCCinsCC	GG	TT	GA	CC	GG
insCCdel--	GG	TT	AA	CC	GG
insCCinsCC	GG	TT	GA	CC	GG
insCCinsCC	GG	TT	GA	CC	GG
insCCinsCC	GG	TT	AA	CC	GG
insCCinsCC	GG	TT	AA	CC	GG
insCCinsCC	GG	TT	AA	CC	GG
insCCinsCC	GG	TT	GA	CC	GG
insCCinsCC	GG	TT	GA	CC	GG
insCCinsCC	GG	TT	AA	CC	GG
insCCinsCC	GG	TT	AA	CC	GG
insCCinsCC	GG	TT	GG	CC	GG
insCCinsCC	GG	TT	AA	CC	GG
insCCinsCC	GG	TT	GA	CC	GG
insCCinsCC	GG	TT	AA	CC	GG
insCCinsCC	GG	TT	AA	CC	GG
insCCinsCC	GG	TT	GA	CC	GG
insCCinsCC	GG	TT	AA	CC	GG
insCCinsCC	GG	TT	AA	CC	GG
insCCinsCC	GG	TT	GA	CC	GG
insCCinsCC	GG	TT	GG	CC	GG
insCCdel--	GG	TT	AA	CC	GG
insCCinsCC	GG	TT	GA	CC	GG
insCCinsCC	GG	TT	GA	CC	GG
insCCinsCC	GG	TT	AA	CC	GG
insCCinsCC	GG	TT	AA	CC	GG
insCCinsCC	GG	TT	GA	CC	GG
insCCinsCC	GG	TT	GA	CC	GG
insCCdel--	GG	TT	GA	CC	GG
insCCinsCC	GG	TT	GA	CC	GG
insCCinsCC	GG	TT	AA	CC	GG
insCCdel--	GG	TT	AA	CC	GG
insCCinsCC	GG	TT	AA	CC	GG
insCCinsCC	GG	TT	GA	CC	GG
insCCinsCC	GG	TT	AA	CC	GG
insCCinsCC	GG	TT	AA	CC	GG
insCCinsCC	GG	TT	GA	CC	GG
insCCinsCC	GG	TT	GA	CC	GG
del--del--	GA	TC	GA	CC	GG
del--del--	GG	TT	AA	CC	GG
del--del--	GG	TT	AA	CC	GG
del--del--	GG	TT	AA	CC	GG
insCCdel--	GG	TT	AA	CC	GG
del--del--	GG	TT	AA	CC	GG
del--del--	GG	NA	AA	NA	NA
insCCdel--	GG	TT	AA	CC	GG
del--del--	GG	TT	AA	CC	GG
del--del--	GG	TT	AA	CC	GG
del--del--	GG	TT	AA	CC	GG
del--del--	GG	TT	AA	CC	GG
del--del--	GG	TT	AA	CC	GG
del--del--	GG	TT	AA	CC	GG
del--del--	GG	TT	AA	CC	GG
del--del--	GG	TT	AA	CC	GG
del--del--	GG	TT	AA	CC	GG
del--del--	GG	TT	AA	CC	GG
del--del--	GG	TT	AA	CC	GG
del--del--	GG	TT	AA	CC	GG
del--del--	GG	TT	AA	NA	NA
del--del--	GG	TT	AA	CC	GG
del--del--	GG	TT	AA	CC	GG
del--del--	GG	TT	AA	CC	GG
insCCdel--	GG	TT	AA	CC	GG
del--del--	GG	TT	AA	CC	GG
del--del--	GG	TT	AA	CC	GG
del--del--	GG	TT	AA	CC	GG
del--del--	GG	TT	AA	NA	GG
del--del--	GG	TT	AA	CC	GG
del--del--	GG	TT	AA	CC	GG
del--del--	GG	NA	AA	NA	NA
del--del--	GG	TT	AA	CC	GG
del--del--	GG	TT	AA	CC	GG
del--del--	GG	TT	AA	CC	GG
del--del--	GG	TT	AA	CC	GG
del--del--	GG	NA	AA	NA	NA
del--del--	GG	TT	AA	CC	GG
insCCdel--	GG	TT	AA	CC	GG
del--del--	GG	TT	AA	CC	GG
insCCdel--	GG	TT	AA	CC	GG
del--del--	GG	NA	AA	NA	NA
insCCdel--	GG	TT	AA	CC	GG
insCCdel--	GG	TT	AA	CC	GG
insCCdel--	GG	TT	AA	CC	GG
insCCdel--	GG	TT	AA	CC	GG
NA	GG	NA	AA	NA	NA
del--del--	GG	TT	AA	CC	GG
del--del--	GG	TT	AA	CC	GG
del--del--	GG	TT	AA	CC	GG
del--del--	GG	TT	AA	CC	GG
del--del--	GG	TT	AA	CC	GG
del--del--	GG	NA	AA	CC	GG
del--del--	GG	TT	AA	CC	GG
del--del--	GG	TT	AA	CC	GG
del--del--	GG	TT	AA	CC	GG
del--del--	GG	TT	AA	CC	GG
del--del--	GG	TT	AA	CC	GG
del--del--	GG	TT	AA	CC	GG
del--del--	GG	TT	AA	CC	GG
del--del--	GG	TT	AA	CC	GG
del--del--	GG	TT	AA	CC	GG
del--del--	GG	TT	AA	CC	GG
insCCdel--	GG	TT	AA	CC	GG
del--del--	GG	TT	AA	CC	GG
del--del--	GG	TT	AA	CC	GG
del--del--	GG	TT	AA	CC	GG
del--del--	GG	TT	AA	CC	GG
del--del--	GG	TT	AA	CC	GG
del--del--	GG	TT	AA	CC	GG
del--del--	GG	TT	AA	CC	GG
del--del--	GG	TT	AA	CC	GG
NA	NA	NA	NA	NA	NA
del--del--	GG	TT	AA	CC	GG
del--del--	GG	TT	AA	CC	GG
del--del--	GG	TT	AA	CC	GG
del--del--	GG	TT	AA	CC	GG
del--del--	GG	TT	AA	CC	GG
del--del--	GG	TT	AA	CC	GG
del--del--	GG	TT	AA	CC	GG
del--del--	GG	TT	AA	CC	GG
del--del--	GG	TT	AA	CC	GG
del--del--	GG	TT	AA	CC	GG
del--del--	GG	TT	AA	CC	GG
del--del--	GG	TT	AA	CC	GG
del--del--	GG	TT	AA	CC	GG
del--del--	GA	TC	GA	CC	GG
del--del--	GG	TT	AA	CC	GG
del--del--	GG	TT	AA	CC	GG
del--del--	GG	TT	AA	CC	GG
del--del--	GG	TT	AA	CC	GG
del--del--	GG	TT	AA	CC	GG
del--del--	GG	TT	AA	CC	GG
del--del--	GG	TT	AA	CC	GG
del--del--	GG	TT	AA	CC	GG
del--del--	GG	TT	AA	CC	GG
del--del--	GG	TT	AA	CC	GG
del--del--	GG	TT	AA	CC	GG
del--del--	GG	TT	AA	CC	GG
del--del--	GG	TT	AA	CC	GG
del--del--	GG	TT	AA	CC	GG
del--del--	GG	TT	AA	CC	GG
insCCdel--	GG	TT	AA	CC	GG
insCCdel--	GG	TT	AA	CC	GG
del--del--	GG	TT	AA	CC	GG
del--del--	GG	TT	AA	CC	GG
del--del--	GG	TT	AA	CC	GG
insCCdel--	GG	TT	AA	CC	GG
insCCdel--	GG	TT	AA	CC	GG
insCCdel--	GG	TT	AA	CC	GG
insCCdel--	GG	TT	AA	CC	GG
insCCdel--	GG	TT	AA	CC	GG
insCCdel--	GG	TT	AA	CC	GG
del--del--	GG	TT	AA	CC	GG
del--del--	GG	TT	AA	CC	GG
del--del--	GG	TT	AA	CC	GG
insCCdel--	GG	TT	AA	CC	GG
del--del--	GG	TT	AA	CC	GG
del--del--	GG	TT	GA	CT	GA
del--del--	GG	TT	AA	CC	GG
del--del--	GG	TT	AA	CC	GG
insCCdel--	GG	TT	AA	CC	GG
del--del--	GG	TT	AA	CC	GG
del--del--	GG	TT	AA	CC	GG
del--del--	GG	TT	AA	CC	GG
del--del--	GG	TT	AA	CC	GG
del--del--	GG	TT	AA	CC	GG
insCCdel--	GG	TT	AA	CC	GG
del--del--	GG	TT	AA	CC	GG
del--del--	GG	TT	AA	CC	GG
del--del--	GG	TT	AA	CC	GG
del--del--	GG	TT	AA	CC	GG
del--del--	GG	TT	AA	CC	GG
del--del--	GG	TT	AA	CC	GG
del--del--	GG	TT	AA	CC	GG
del--del--	GG	TT	AA	CC	GG
del--del--	GG	TT	AA	CC	GG
del--del--	GG	TT	AA	CC	GG
del--del--	NA	TT	AA	CC	GG
del--del--	GG	TT	AA	CC	GG
insCCdel--	GG	TT	AA	CC	GG
del--del--	GG	TT	AA	CC	GG
del--del--	GG	TT	AA	CC	GG
del--del--	GG	TT	AA	CC	GG
NA	NA	TC	NA	CC	GG
NA	NA	CC	NA	CC	NA
NA	NA	CC	NA	CC	NA
del--del--	AA	CC	GG	CC	NA
NA	NA	CC	NA	CC	NA
del--del--	AA	CC	GG	CC	NA
del--del--	AA	CC	GG	CC	NA
insCCdel--	GA	NA	GA	CC	GG
NA	NA	CC	NA	CC	NA
NA	NA	NA	NA	NA	NA
del--del--	AA	CC	GG	CC	NA
del--del--	AA	NA	GG	CC	NA
NA	NA	CC	NA	CC	NA
del--del--	AA	CC	GG	CC	NA
del--del--	AA	CC	GG	CC	NA
insCCdel--	GA	NA	GA	CC	GG
del--del--	AA	CC	GG	CC	NA
NA	NA	CC	NA	CC	NA
del--del--	AA	CC	GG	CC	NA
NA	NA	TT	NA	CC	GG
insCCdel--	GG	TT	AA	CC	GG
NA	NA	CC	NA	CC	NA
del--del--	AA	CC	GG	CC	NA
NA	NA	CC	NA	CC	NA
NA	NA	TC	NA	CT	AA
del--del--	AA	CC	GG	CC	NA
del--del--	AA	NA	GG	CC	NA
del--del--	AA	NA	GG	NA	NA
NA	NA	CC	NA	CC	NA
del--del--	AA	NA	GG	NA	NA
del--del--	AA	CC	GG	CC	NA
del--del--	AA	CC	GG	CC	NA
NA	NA	CC	NA	CC	NA
NA	NA	CC	NA	CC	NA
del--del--	AA	CC	GG	CC	NA
NA	NA	CC	NA	NA	NA
del--del--	AA	CC	GG	CC	NA
NA	NA	CC	NA	CC	NA
del--del--	GA	NA	GA	NA	NA
NA	NA	TC	NA	CC	GG
NA	NA	CC	NA	NA	NA
NA	NA	NA	NA	NA	NA
del--del--	AA	CC	GG	CC	NA
del--del--	AA	NA	GG	CC	NA
del--del--	AA	CC	GG	CC	NA
del--del--	AA	CC	GG	CC	NA
NA	NA	TC	NA	CC	GG
del--del--	GG	TT	AA	CC	GG
del--del--	GG	TT	AA	CC	GG
del--del--	GG	TT	AA	CC	GG
del--del--	GG	TT	AA	CC	GG
del--del--	GG	TT	AA	CC	GG
del--del--	GG	TT	AA	CC	GG
del--del--	GG	TT	AA	CC	GG
del--del--	GG	TT	AA	CC	GG
del--del--	GG	TT	AA	CC	GG
del--del--	GG	TT	AA	CC	GG
del--del--	GG	TT	AA	CC	GG
del--del--	GG	TT	AA	CC	GG
del--del--	GG	TT	AA	CC	GG
del--del--	GG	TT	AA	CC	GG
del--del--	GG	TT	GA	NA	GA
del--del--	GG	TT	AA	CC	GG
del--del--	GG	TT	AA	CC	GG
del--del--	GG	TT	AA	CC	GG
del--del--	GG	TT	AA	CC	GG
del--del--	GG	TT	AA	CC	GG
del--del--	GG	TT	AA	CC	GG
del--del--	GG	TT	AA	CC	GG
del--del--	GG	TT	AA	CC	GG
del--del--	GG	TT	AA	CC	GG
del--del--	GG	TT	AA	CC	GG
del--del--	GG	TT	GA	CT	GA
del--del--	GG	TT	AA	CC	GG
insCCdel--	GG	TT	AA	CC	GG
del--del--	GG	TT	AA	CC	GG
del--del--	GG	TT	AA	CC	GG
del--del--	GG	TT	AA	CC	GG
insCCdel--	GG	TT	AA	CC	GG
del--del--	GG	TT	AA	CC	GG
del--del--	GG	TT	AA	CC	GG
del--del--	GG	TT	AA	CC	GG
insCCdel--	GG	TT	AA	CC	GG
del--del--	GG	TT	AA	CC	GG
del--del--	GG	TT	AA	CC	GG
del--del--	GG	TT	AA	CC	GG
insCCdel--	GG	TT	AA	CC	GG
insCCdel--	GG	TT	AA	CC	GG
del--del--	GG	TT	AA	CC	GG
del--del--	GG	TT	AA	CC	GG
insCCdel--	GG	TT	AA	CC	GG
insCCdel--	GG	TT	AA	CC	GG
del--del--	GG	TT	AA	CC	GG
insCCdel--	GG	TT	AA	CC	GG
del--del--	GG	TT	AA	CC	GG
insCCdel--	GG	TT	AA	CC	GG
del--del--	GG	TT	GA	CT	GA
del--del--	GG	TT	AA	CC	GG
del--del--	GG	TT	AA	CC	GG
del--del--	GG	TT	AA	CC	GG
del--del--	GG	NA	AA	NA	NA
del--del--	GG	TT	AA	CC	GG
del--del--	GG	TT	AA	CC	GG
del--del--	GG	TT	AA	CC	GG
del--del--	GG	TT	GA	CT	GA
del--del--	GG	TT	AA	CC	GG
del--del--	GG	TT	AA	CC	GG
del--del--	GG	TT	AA	CC	GG
insCCdel--	NA	TT	AA	CC	GG
del--del--	GG	TT	GA	CT	GA
del--del--	GG	TT	AA	CC	GG
del--del--	GG	TT	AA	CC	GG
insCCdel--	GG	TT	AA	CC	GG
insCCdel--	GG	TT	AA	CC	GG
insCCdel--	GG	TT	AA	CC	GG
del--del--	GG	TT	AA	CC	GG
del--del--	GG	TT	AA	CC	GG
del--del--	GG	TT	AA	CC	GG
del--del--	GG	TT	AA	CC	GG
insCCdel--	GG	TT	AA	CC	GG
insCCdel--	GG	TT	AA	CC	GG
del--del--	GG	TT	AA	CC	GG
insCCdel--	GG	TT	AA	CC	GG
insCCdel--	GG	TT	AA	CC	GG
del--del--	GG	TT	AA	CC	GG
del--del--	GG	TT	GA	CT	GA
del--del--	GG	TT	GA	CT	GA
insCCdel--	GG	TT	AA	CC	GG
del--del--	GG	TT	AA	CC	GG
del--del--	GG	TT	AA	CC	GG
del--del--	GG	TT	AA	CC	GG
del--del--	GG	TT	AA	CC	GG
insCCdel--	GG	TT	AA	CC	GG
del--del--	GG	TT	GA	CT	GA
del--del--	GG	TT	AA	CC	GG
del--del--	GG	TT	AA	CC	GG
insCCdel--	GG	TT	AA	CC	GG
insCCdel--	GG	TT	AA	CC	GG
del--del--	GG	TT	AA	CC	GG
insCCdel--	GG	TT	AA	CC	GG
insCCdel--	GG	TT	AA	CC	GG
del--del--	GG	TT	AA	CC	GG
del--del--	GG	TT	AA	CC	GG
del--del--	GG	TT	AA	CC	GG
del--del--	GG	TT	AA	CC	GG
del--del--	GG	TT	AA	CC	GG
del--del--	GG	TT	AA	CC	GG
del--del--	GG	TT	AA	CC	GG
del--del--	GG	TT	AA	CC	GG
del--del--	GG	TT	AA	CC	GG
del--del--	GG	TT	AA	CC	GG
del--del--	GG	TC	AA	CC	GG
del--del--	GG	TT	AA	CC	GG
del--del--	GG	TT	AA	CC	GG
del--del--	GG	TT	AA	CC	GG
del--del--	GG	TT	AA	CC	GG
del--del--	GG	TT	AA	CC	GG
del--del--	GG	TT	AA	CC	GG
del--del--	GG	TT	AA	CC	GG
del--del--	GG	TT	AA	CC	GG
del--del--	GG	NA	AA	CC	GG
del--del--	GG	TT	AA	CC	GG
del--del--	GG	TT	AA	CC	GG
del--del--	GG	TT	AA	CC	GG
insCCdel--	GG	TT	AA	CC	GG
del--del--	GG	TT	AA	CC	GG
del--del--	GG	TT	AA	CC	GG
NA	GG	TT	AA	CC	GG
del--del--	GG	TT	AA	CC	GG
del--del--	GG	TT	AA	CC	GG
del--del--	GG	TT	AA	CC	GG
del--del--	GG	TT	AA	CC	GG
del--del--	GG	TT	AA	CC	GG
del--del--	GG	TT	AA	CC	GG
del--del--	GG	TT	AA	CC	GG
del--del--	GG	TT	AA	CC	GG
del--del--	GG	TT	AA	CC	GG
del--del--	GG	TT	AA	CC	GG
del--del--	GG	TT	AA	CC	GG
insCCdel--	GG	TT	AA	CC	GG
del--del--	GG	TT	AA	CC	GG
del--del--	GG	TT	AA	CC	GG
del--del--	GG	TT	AA	CC	GG
del--del--	GG	TT	AA	CC	GG
del--del--	GG	TT	AA	CC	GG
del--del--	GG	TT	AA	CC	GG
del--del--	GG	TT	AA	CC	GG
del--del--	GG	TT	AA	CC	GG
del--del--	GG	TT	AA	CC	GG
del--del--	GG	TT	AA	CC	GG
insCCdel--	GG	TT	AA	CC	GG
insCCdel--	GG	TT	AA	CC	GG
insCCdel--	GG	TT	AA	CC	GG
insCCdel--	GG	TT	AA	CC	GG
insCCinsCC	GG	TT	GA	CC	NA
insCCinsCC	GG	TT	GA	CC	GG
insCCinsCC	GG	TT	GA	CC	GG
insCCinsCC	GG	TT	GA	CC	GG
insCCinsCC	GG	TT	GA	CC	GG
insCCinsCC	GG	TT	GA	CC	GG
insCCinsCC	GG	TT	GA	CC	GG
insCCinsCC	GG	TT	AA	CC	GG
insCCinsCC	GG	TT	AA	CC	GG
insCCinsCC	GG	TT	GA	CC	GG
insCCinsCC	GG	TT	AA	CC	GG
insCCinsCC	GG	TT	AA	CC	GG
insCCinsCC	GG	TT	GA	CC	GG
insCCdel--	GG	TT	AA	CC	GG
insCCinsCC	GG	TT	GA	CC	GG
insCCinsCC	GG	TT	GG	CC	GG
insCCinsCC	GG	TT	GA	CC	GG
insCCdel--	GG	TT	GA	CC	GG
insCCinsCC	GG	TT	GA	CC	GG
insCCinsCC	GG	TT	AA	CC	GG
insCCinsCC	GG	TT	AA	CC	GG
insCCinsCC	GG	TT	AA	CC	GG
insCCinsCC	GG	TT	AA	CC	GG
insCCinsCC	GG	TT	AA	CC	GG
insCCinsCC	GG	TT	AA	CC	GG
insCCinsCC	GG	NA	GG	CC	GG
insCCinsCC	GG	TT	AA	CC	GG
insCCinsCC	GG	TT	GG	CC	GG
insCCinsCC	GG	TT	GA	CC	GG
insCCinsCC	GG	TT	AA	CC	GG
insCCinsCC	GG	TT	AA	CC	GG
insCCinsCC	GG	TT	AA	CC	GG
insCCinsCC	GG	TT	GA	CC	GG
insCCinsCC	GG	TT	AA	CC	GG
insCCinsCC	GG	TT	AA	CC	GG
insCCinsCC	GG	TT	AA	CC	GG
insCCinsCC	GG	TT	GA	CC	GG
insCCinsCC	GG	TT	GA	CC	GG
insCCinsCC	GG	TT	GA	CC	GG
insCCinsCC	GG	TT	AA	CC	GG
insCCinsCC	GG	TT	AA	CC	GG
insCCinsCC	GG	TT	AA	CC	GG
insCCinsCC	GG	TT	GA	CC	GG
NA	NA	TT	NA	CC	GG
NA	NA	TT	NA	CC	GG
NA	NA	TT	NA	CC	GG
NA	NA	TT	NA	CC	GG
NA	NA	TT	NA	NA	GG
NA	NA	TT	NA	CC	GG
NA	NA	TT	NA	CT	GA
del--del--	GG	TT	AA	CC	GG
NA	NA	TT	NA	CC	GG
NA	NA	TT	NA	CC	GG
NA	NA	TT	NA	CC	GG
NA	NA	TT	NA	CC	GG
NA	NA	TT	NA	CC	GG
NA	NA	TT	NA	CC	GG
NA	NA	TT	NA	CC	GG
insCCdel--	GG	TT	AA	CC	GG
del--del--	GG	TT	AA	CC	GG
del--del--	GG	TT	AA	CC	GG
del--del--	GG	TT	AA	CC	GG
del--del--	GG	TT	AA	CC	GG
insCCdel--	GG	TT	AA	CC	GG
insCCdel--	GG	TT	AA	CC	GG
insCCdel--	GG	TT	AA	CC	GG
del--del--	GG	TT	AA	CC	GG
del--del--	GG	TT	AA	CC	GG
insCCdel--	GG	TT	AA	CC	GG
del--del--	GG	TT	AA	CC	GG
del--del--	GG	TT	AA	CC	GG
del--del--	GG	TT	AA	CC	GG
del--del--	GG	TT	GA	CT	GA
del--del--	GG	TT	AA	CC	GG
insCCdel--	GG	TT	AA	CC	GG
del--del--	GG	TT	AA	CC	GG
del--del--	GG	TT	AA	CC	GG
del--del--	GG	TT	AA	CC	GG
del--del--	GG	TT	AA	CC	GG
insCCdel--	GG	TT	AA	CC	GG
del--del--	GG	TT	AA	CC	GG
insCCdel--	GG	TT	AA	CC	GG
NA	NA	NA	NA	NA	NA
insCCdel--	GG	TT	AA	CC	GG
del--del--	GG	TT	AA	CC	GG
del--del--	GG	TT	AA	CC	GG
del--del--	GG	TT	AA	CC	GG
NA	NA	TT	NA	CC	GG
insCCdel--	GG	TT	AA	CC	GG
del--del--	GG	TT	AA	CC	GG
NA	NA	TT	NA	CC	GG
insCCinsCC	GG	TT	AA	CC	GG
insCCinsCC	GG	TT	AA	CC	GG
insCCinsCC	GG	TT	AA	CC	GG
insCCinsCC	GG	TT	AA	CC	GG
insCCinsCC	GG	TT	AA	CC	GG
insCCinsCC	GG	TT	AA	CC	GG
insCCinsCC	GG	TT	AA	CC	GG
insCCinsCC	GG	TT	AA	CC	GG
insCCinsCC	GG	TT	AA	CC	GG
insCCinsCC	GG	TT	AA	CC	GG
insCCinsCC	GG	TT	AA	CC	GG
insCCinsCC	GG	TT	AA	CC	GG
insCCinsCC	GG	TT	AA	CC	GG
insCCinsCC	GG	TT	AA	CC	GG
insCCinsCC	GG	TT	AA	CC	GG
insCCinsCC	GG	TT	AA	CC	GG
insCCinsCC	GG	TT	AA	CC	GG
insCCinsCC	GG	TT	AA	CC	GG
insCCinsCC	GG	TT	AA	CC	GG
insCCinsCC	GG	TT	AA	CC	GG
insCCinsCC	GG	TT	AA	CC	GG
insCCinsCC	GG	TT	AA	CC	GG
insCCinsCC	GG	TT	AA	CC	GG
insCCinsCC	GG	TT	AA	CC	GG
insCCinsCC	GG	TT	AA	CC	GG
insCCinsCC	GG	TT	AA	CC	GG
insCCinsCC	GG	TT	AA	CC	GG
insCCinsCC	GG	TT	AA	CC	GG
insCCinsCC	GG	TT	AA	CC	GG
insCCinsCC	GG	TT	AA	CC	GG
insCCinsCC	GG	TT	AA	CC	GG
insCCinsCC	GG	TT	AA	CC	GG
insCCinsCC	GG	TT	AA	CC	GG
insCCinsCC	GG	TT	AA	CC	GG
insCCinsCC	GG	TT	AA	CC	GG
insCCinsCC	GG	TT	AA	CC	GG
insCCinsCC	GG	TT	AA	CC	GG
insCCinsCC	GG	TT	AA	CC	GG
insCCinsCC	GG	TT	AA	CC	GG
insCCinsCC	GG	TT	AA	CC	GG
insCCinsCC	GG	TT	AA	CC	GG
insCCinsCC	GG	TT	AA	CC	GG
insCCinsCC	GG	TT	AA	CC	GG
insCCinsCC	GG	TT	AA	CC	GG
insCCinsCC	GG	TT	AA	CC	GG
insCCinsCC	GG	TT	AA	CC	GG
insCCinsCC	GG	TT	AA	CC	GG
insCCinsCC	GG	TT	AA	CC	GG
insCCinsCC	GG	TT	AA	CC	GG
insCCdel--	GG	TT	GA	CT	GA
insCCinsCC	GG	TT	AA	CC	GG
insCCinsCC	GG	TT	AA	CC	GG
insCCinsCC	GG	TT	AA	CC	GG
insCCinsCC	GG	NA	AA	CC	GG
insCCdel--	GG	TT	GA	CT	GA
insCCinsCC	GG	TT	AA	CC	GG
insCCinsCC	GG	TT	AA	CC	GG
insCCinsCC	GG	TT	AA	CC	GG
insCCinsCC	GG	TT	AA	CC	GG
insCCinsCC	GG	TT	AA	CC	GG
insCCinsCC	GG	TT	AA	CC	GG
insCCdel--	GG	TT	GA	CT	GA
insCCinsCC	GG	TT	AA	CC	GG
insCCinsCC	GG	TT	AA	CC	GG
insCCdel--	GG	TT	GA	CT	GA
insCCdel--	GG	TT	GA	CT	GA
insCCdel--	GG	TT	GA	CT	GA
insCCdel--	GG	TT	GA	CT	GA
insCCinsCC	GG	TT	AA	CC	GG
insCCinsCC	GG	TT	AA	CC	GG
insCCinsCC	GG	TT	AA	CC	GG
insCCinsCC	GG	TT	AA	CC	GG
insCCinsCC	GG	TT	AA	CC	GG
insCCinsCC	GG	TT	AA	CC	GG
insCCinsCC	GG	TT	AA	CC	GG
insCCinsCC	GG	TT	AA	CC	GG
insCCinsCC	GG	TT	AA	CC	GG
NA	GG	TT	GA	CT	GA
insCCdel--	GG	TT	GA	CT	GA
insCCinsCC	GG	TT	AA	CC	GG
insCCdel--	GG	TT	GA	CT	GA
insCCinsCC	GG	TT	AA	CC	GG
insCCinsCC	GG	TT	AA	CC	GG
insCCinsCC	GG	TT	AA	CC	GG
insCCinsCC	GG	TT	AA	CC	GG
insCCinsCC	GG	TT	AA	CC	GG
insCCinsCC	GG	TT	AA	CC	GG
insCCinsCC	GG	TT	AA	CC	GG
insCCinsCC	GG	NA	AA	CC	GG
insCCinsCC	GG	TT	AA	CC	GG
insCCinsCC	GG	TT	AA	CC	GG
insCCdel--	GG	TT	GA	CT	GA
insCCdel--	GG	TT	GA	CT	GA
insCCinsCC	GG	TT	AA	CC	GG
insCCinsCC	GG	TT	AA	CC	GG
insCCdel--	GG	TT	GA	CT	GA
del--del--	GG	TT	AA	CC	GG
del--del--	GG	TT	AA	CC	GG
del--del--	GG	TT	AA	CC	GG
del--del--	GG	TT	AA	CC	GG
del--del--	GG	TT	AA	CC	GG
del--del--	GG	TT	AA	CC	GG
del--del--	GG	TT	AA	CC	GG
insCCdel--	GG	TT	AA	CC	GG
del--del--	GG	TT	AA	CC	GG
del--del--	GG	TT	AA	CC	GG
del--del--	GG	TT	AA	CC	GG
del--del--	GG	TT	AA	CC	GG
del--del--	GG	TT	AA	CC	GG
del--del--	GG	TT	AA	CC	GG
del--del--	GG	TT	AA	CC	GG
insCCdel--	GG	NA	AA	CC	GG
del--del--	GG	TT	AA	CC	GG
del--del--	GG	TT	AA	CC	GG
del--del--	GG	TT	AA	CC	GG
del--del--	GG	TT	AA	CC	GG
del--del--	GG	TT	AA	CC	GG
del--del--	GG	TT	AA	CC	GG
del--del--	GG	TT	AA	CC	GG
del--del--	GG	TT	AA	CT	GA
del--del--	GG	TT	AA	CC	GG
del--del--	GG	TT	AA	CC	GG
insCCdel--	GG	TT	AA	CC	GG
del--del--	GG	TT	AA	CC	GG
del--del--	GG	TT	AA	CC	GG
del--del--	GG	TT	AA	CC	GG
del--del--	GG	TT	AA	CC	GG
del--del--	GG	TT	AA	CC	GG
del--del--	GG	TT	AA	CC	GG
del--del--	GG	TT	AA	CC	GG
insCCdel--	GG	TT	AA	CC	GG
del--del--	GG	TT	AA	CC	GG
del--del--	GG	TT	AA	CC	GG
del--del--	GG	TT	AA	CC	GG
insCCdel--	GG	TT	AA	CC	GG
del--del--	GG	TT	AA	CC	GG
del--del--	GG	TT	AA	CC	GG
del--del--	GG	TT	AA	CC	GG
del--del--	GG	TT	AA	CC	GG
del--del--	NA	TC	GA	CC	GG
del--del--	NA	TC	GA	CC	GG
del--del--	GG	TT	GA	CC	GG
del--del--	GG	TT	NA	CC	GG
del--del--	GG	TT	NA	CC	GG
del--del--	GG	TT	GG	CT	GA
del--del--	GG	TT	GG	CT	GA
del--del--	GG	TT	GG	TT	AA
del--del--	GG	TT	GG	CT	GA
NA	NA	TT	NA	NA	GA
NA	NA	NA	NA	NA	NA
del--del--	GG	TT	GG	CT	GA
del--del--	GG	TT	GG	CT	GA
NA	NA	NA	NA	NA	NA
del--del--	GG	TT	GG	TT	AA
del--del--	GG	TT	GG	CT	GA
del--del--	GG	TT	GG	CT	GA
del--del--	GG	TT	GG	CC	GG
del--del--	GG	TT	GG	NA	GA
del--del--	GG	TT	GG	CT	GA
del--del--	GG	TT	GG	CC	GG
del--del--	GG	TT	GG	CT	GA
del--del--	GG	TT	GG	CT	GA
del--del--	GG	TT	GG	CC	GG
del--del--	GG	TT	GG	CT	GA
del--del--	GG	TT	GG	CT	GA
del--del--	GG	TT	GG	CT	GA
del--del--	GG	TT	GG	TT	AA
del--del--	GG	TT	GG	TT	AA
del--del--	GG	TT	GG	TT	AA
del--del--	GG	TT	GG	CC	GG
del--del--	GG	TT	GG	CT	GA
del--del--	GG	TT	GG	CC	GG
del--del--	GG	TT	GG	CC	GG
del--del--	GG	TT	GG	CC	GG
del--del--	GG	TT	GG	CC	GG
del--del--	GG	TT	GG	CT	GA
del--del--	GG	TT	GG	CC	GG
del--del--	GG	TT	GG	CC	GG
del--del--	GG	TT	GG	CT	GA
del--del--	GG	TT	GG	TT	AA
del--del--	GG	TT	GG	CT	GA
del--del--	GG	TT	GG	CT	GA
del--del--	GG	TT	GG	CT	GA
del--del--	GG	TT	GG	CT	GA
del--del--	GG	TT	GG	TT	AA
del--del--	GG	TT	GG	CT	GA
del--del--	GG	TT	GG	CT	GA
del--del--	GG	TT	GG	CT	GA
del--del--	GG	TT	GG	CC	GG
del--del--	GG	TT	GG	TT	AA
del--del--	GG	TT	GG	TT	AA
insCCdel--	GA	TC	GA	CC	GG
insCCdel--	GA	TC	GA	CC	GG
del--del--	GA	TC	GA	CC	GG
del--del--	GG	TT	GA	CC	GG
del--del--	AA	CC	GG	CC	NA
del--del--	GG	TT	AA	CC	GG
del--del--	GA	TC	GA	CC	GG
del--del--	GA	TC	GA	CC	GG
del--del--	AA	CC	GG	CC	NA
del--del--	GA	TC	NA	CC	GG
insCCdel--	GA	TC	GA	CC	GG
del--del--	GA	TC	GA	CC	GG
insCCdel--	GA	TC	GA	CC	GG
del--del--	GA	TC	GA	CC	GG
insCCdel--	GG	TT	AA	CC	GG
del--del--	GA	TC	GG	CC	GG
insCCdel--	GA	TC	GA	CC	GG
del--del--	GA	TC	GA	CC	GG
insCCdel--	GA	TC	GA	CC	GG
insCCdel--	GG	TT	AA	CC	GG
del--del--	GG	TT	AA	CC	GG
insCCdel--	GG	TT	AA	CC	GG
del--del--	AA	CC	GG	CC	NA
del--del--	GG	TT	AA	CC	GG
insCCdel--	GA	TC	GA	CC	GG
insCCdel--	GG	TT	AA	CC	GG
insCCdel--	GG	TT	AA	CC	GG
insCCdel--	GG	TT	AA	CC	GG
del--del--	GA	TC	GG	CC	GG
del--del--	GA	TC	GA	CC	GG
del--del--	AA	CC	GG	CC	NA
del--del--	GA	TC	GA	CC	GG
insCCdel--	GG	TT	AA	CC	GG
del--del--	GA	TC	GA	CC	GG
del--del--	AA	NA	GG	CC	NA
del--del--	GG	TT	AA	CC	GG
del--del--	GG	TT	AA	CC	GG
del--del--	GA	TC	GA	CC	GG
del--del--	GG	TT	AA	CC	GG
del--del--	GG	TT	AA	CC	GG
del--del--	GA	TC	GA	CC	GG
del--del--	GA	TC	GA	CC	GG
del--del--	GG	TT	AA	CC	GG
del--del--	GA	TC	GA	CC	GG
insCCdel--	GA	TC	GA	CC	GG
del--del--	GG	TT	AA	CC	GG
insCCdel--	GA	TC	GA	CC	GG
del--del--	GA	TC	GA	CC	GG
insCCdel--	GG	TT	AA	CC	GG
del--del--	GG	TT	AA	CC	GG
NA	NA	NA	NA	NA	NA
del--del--	GG	TT	AA	CC	GG
NA	NA	NA	NA	NA	NA
del--del--	GG	TT	AA	CC	GG
insCCdel--	GG	TT	AA	NA	GG
del--del--	GG	NA	AA	NA	NA
insCCdel--	GA	TC	GA	CC	GG
del--del--	GG	NA	AA	NA	NA
NA	NA	TT	NA	NA	GG
insCCdel--	GG	NA	AA	CC	GG
insCCdel--	GG	TT	AA	CC	GG
del--del--	GA	TC	GA	CC	GG
del--del--	GG	TT	AA	CC	GG
del--del--	GG	TT	AA	CC	GG
del--del--	GG	TT	AA	CC	GG
del--del--	GG	TT	AA	CC	GG
del--del--	GG	TT	AA	CC	GG
insCCdel--	GG	TT	AA	CC	GG
insCCdel--	GG	TT	AA	CC	GG
insCCinsCC	GG	TT	AA	CC	GG
del--del--	GG	TT	GA	CT	NA
insCCdel--	GG	TT	AA	CC	GG
del--del--	GG	TT	GA	NA	GA
NA	NA	NA	NA	NA	NA
insCCdel--	GG	TT	AA	CC	GG
del--del--	GA	TC	GA	CC	GG
NA	NA	NA	NA	NA	NA
del--del--	GG	TT	AA	CC	GG
del--del--	GG	NA	AA	NA	NA
del--del--	GG	TT	AA	CC	GG
del--del--	GG	TT	AA	CC	GG
del--del--	GG	TT	AA	CC	GG
del--del--	GG	TT	AA	CC	GG
del--del--	GG	TT	AA	CC	GG
del--del--	GG	TT	AA	CC	GG
del--del--	GG	TT	AA	CC	GG
insCCdel--	GG	TT	AA	CC	NA
NA	NA	TT	NA	CC	GG
del--del--	GG	TT	AA	CC	GG
del--del--	GG	TT	GA	CC	GG
del--del--	GG	TT	AA	NA	NA
insCCdel--	GG	TT	AA	CC	GG
insCCdel--	GG	TT	AA	CC	GG
del--del--	GG	TT	AA	CC	GG
insCCinsCC	GG	TT	AA	CC	GG
del--del--	GG	TT	AA	CC	GG
insCCinsCC	GG	TT	AA	CC	GG
insCCdel--	GG	TT	AA	CC	GG
insCCdel--	GA	TC	GA	CC	GG
insCCinsCC	GG	TT	AA	CC	GG
insCCdel--	GG	TT	AA	CC	GG
insCCdel--	GG	TT	AA	CC	GG
insCCdel--	GG	TT	AA	CC	GG
insCCinsCC	GG	TT	AA	CC	GG
insCCinsCC	GG	TT	AA	CC	GG
insCCinsCC	GG	TT	AA	CC	GG
del--del--	GG	TT	GG	CT	GA
del--del--	GG	TT	AA	CC	GG
insCCdel--	GG	TT	AA	CC	GG
insCCdel--	GG	TT	AA	CC	GG
insCCdel--	GG	TT	AA	CC	GG
insCCdel--	GG	TT	AA	CC	GG
insCCinsCC	GG	TT	AA	CC	GG
insCCinsCC	GG	TT	AA	CC	GG
insCCdel--	GG	TT	AA	CC	GG
insCCinsCC	GG	TT	AA	CC	GG
insCCinsCC	GG	TT	AA	CC	GG
insCCdel--	GG	TT	AA	CC	GG
insCCinsCC	GG	TT	AA	CC	GG
insCCdel--	GG	TT	AA	CC	GG
insCCinsCC	GG	TT	AA	CC	GG
insCCinsCC	GG	TT	AA	CC	GG
insCCinsCC	GG	TT	AA	CC	GG
insCCinsCC	GG	TT	AA	CC	GG
insCCinsCC	GG	TT	AA	CC	GG
insCCdel--	GG	TT	GA	CT	GA
insCCinsCC	GG	TT	AA	CC	GG
insCCdel--	GA	TC	GA	CC	GG
insCCdel--	GG	TT	AA	CC	GG
del--del--	GG	TT	GA	CT	GA
insCCdel--	GA	TC	GA	CC	GG
insCCdel--	GG	TT	AA	CC	GG
insCCinsCC	GG	TT	AA	CC	GG
insCCdel--	GG	TT	AA	CC	GG
insCCdel--	GG	TT	AA	CC	GG
insCCinsCC	GG	TT	AA	CC	GG
insCCinsCC	GG	TT	AA	CC	GG
insCCdel--	GG	TT	AA	NA	GG
del--del--	GG	TT	AA	CC	GG
insCCdel--	GG	TT	AA	CC	GG
insCCdel--	GA	TC	GA	CC	GG
del--del--	GG	TT	AA	CC	GG
del--del--	GG	TT	AA	CC	GG
del--del--	AA	CC	GG	CC	NA
del--del--	GG	TT	AA	CC	GG
del--del--	GA	TC	GA	CC	GG
del--del--	GA	TC	GA	CC	GG
del--del--	GG	TT	AA	CC	GG
del--del--	GG	TT	AA	CC	GG
del--del--	GG	TT	AA	CC	GG
del--del--	GG	TT	AA	CC	GG
del--del--	GA	TC	GA	CC	GG
del--del--	GG	TT	AA	CC	GG
del--del--	GA	TC	GA	CC	GG
del--del--	GG	TT	AA	CC	GG
del--del--	GG	TT	AA	CC	GG
del--del--	GG	TT	AA	CC	GG
del--del--	GA	TC	GA	CC	GG
del--del--	GA	TC	GA	CC	GG
del--del--	GG	TT	AA	CC	GG
del--del--	GG	TT	AA	CC	GG
del--del--	GG	TT	AA	CC	GG
del--del--	GG	TT	AA	CC	GG
del--del--	GG	TT	AA	CC	GG
del--del--	GG	TT	AA	CC	GG
del--del--	GG	TT	AA	CC	GG
del--del--	GA	TC	GA	CC	GG
del--del--	GG	TT	AA	CC	GG
del--del--	GG	TT	AA	CC	GG
del--del--	GA	TC	GA	CC	GG
del--del--	GG	TT	AA	CC	GG
del--del--	AA	CC	GG	CC	NA
del--del--	GG	TT	AA	CC	GG
del--del--	GG	TT	AA	CC	GG
del--del--	GG	TT	AA	CC	GG
del--del--	GG	TT	AA	CC	GG
del--del--	GA	TC	GA	CC	GG
del--del--	GG	TT	AA	CC	GG
del--del--	GG	TT	AA	CC	GG
del--del--	GG	TT	AA	CC	GG
del--del--	GG	TT	AA	CC	GG
del--del--	GG	TT	AA	CC	GG
del--del--	GG	TT	AA	CC	GG
del--del--	GG	TT	AA	CC	GG
del--del--	GG	TT	AA	CC	GG
del--del--	GA	TC	GA	CC	GG
del--del--	GA	TC	GA	CC	GG
del--del--	GG	TT	AA	CC	GG
del--del--	GG	TT	AA	CC	GG
del--del--	GG	TT	GG	CC	GG
del--del--	GG	TT	GG	CC	GG
del--del--	GG	TT	GG	CC	GG
del--del--	GG	TT	GG	CC	GG
del--del--	GG	TT	GG	CC	GG
del--del--	GG	TT	GG	CC	GG
del--del--	GG	TT	GG	CC	GG
del--del--	GG	TT	GG	CC	GG
del--del--	GG	TT	GG	CC	GG
del--del--	GG	TT	GG	CC	GG
del--del--	GG	TT	GG	CC	GG
del--del--	GG	TT	GG	CC	GG
del--del--	GG	TT	GG	CC	GG
del--del--	GG	TT	GG	CC	GG
del--del--	GG	TT	GG	CC	GG
del--del--	GG	TT	GG	CC	GG
del--del--	GG	TT	GG	CC	GG
del--del--	GG	TT	GG	CC	GG
del--del--	GG	TT	GG	CC	GG
del--del--	GG	TT	GG	CC	GG
del--del--	GG	TT	GG	CC	GG
del--del--	GG	TT	GG	CC	GG
del--del--	GG	TT	GG	CC	GG
del--del--	GG	TT	GG	CC	GG
del--del--	GG	TT	GG	CC	GG
del--del--	GG	TT	GG	CC	GG
del--del--	GG	TT	GG	CC	GG
del--del--	GG	TT	GG	CC	GG
del--del--	GG	TT	GG	CC	GG
del--del--	GG	TT	GG	CC	GG
del--del--	GG	TT	GG	CC	GG
del--del--	GG	TT	GG	CC	GG
del--del--	GG	TT	GG	CC	GG
del--del--	GG	TT	GG	CC	GG
del--del--	GG	TT	GG	CC	GG
del--del--	GG	TT	GG	CC	GG
del--del--	GG	TT	GG	CC	GG
del--del--	GG	TT	GG	CC	GG
del--del--	GG	TT	GG	CC	GG
del--del--	GG	TT	GG	CC	GG
del--del--	GG	TT	GG	CC	GG
del--del--	GG	TT	GG	CC	GG
del--del--	GG	TT	GG	CC	GG
del--del--	GG	TT	GG	CC	GG
NA	NA	TT	NA	CC	GG
del--del--	GG	TT	GG	CC	GG
del--del--	GG	TT	GG	CC	GG
del--del--	GG	TT	GG	CC	GG
insCCinsCC	GG	TT	AA	CC	GG
insCCinsCC	GG	NA	AA	NA	NA
insCCinsCC	GG	NA	AA	NA	NA
insCCinsCC	GG	TT	AA	CC	GG
insCCinsCC	GG	TT	AA	CC	GG
insCCinsCC	GG	TT	AA	CC	GG
insCCinsCC	GG	TT	AA	CC	GG
insCCinsCC	GG	TT	AA	CC	GG
insCCinsCC	GG	TT	AA	CC	GG
insCCinsCC	GG	TT	AA	CC	GG
insCCinsCC	GG	TT	AA	CC	GG
insCCinsCC	GG	TT	AA	CC	GG
insCCinsCC	GG	TT	AA	CC	GG
insCCinsCC	GG	TT	AA	CC	GG
insCCinsCC	GG	TT	AA	CC	GG
insCCinsCC	GG	TT	AA	CC	GG
insCCinsCC	GG	TT	AA	NA	GG
insCCinsCC	GG	TT	AA	CC	GG
insCCinsCC	GG	TT	AA	CC	GG
insCCinsCC	GG	TT	AA	CC	GG
insCCinsCC	GG	TT	AA	CC	GG
insCCinsCC	GG	TT	AA	NA	GG
insCCinsCC	GG	TT	AA	CC	GG
insCCinsCC	GG	TT	AA	CC	GG
insCCinsCC	GG	NA	AA	NA	NA
insCCinsCC	GG	TT	NA	NA	GG
insCCinsCC	GG	TT	AA	CC	GG
insCCinsCC	GG	TT	AA	CC	GG
insCCinsCC	GG	TT	AA	CC	GG
insCCinsCC	GG	TT	AA	CC	GG
insCCinsCC	GG	TT	AA	CC	GG
insCCinsCC	GG	TT	AA	CC	GG
insCCinsCC	GG	TT	AA	CC	GG
insCCinsCC	GG	TT	AA	CC	GG
insCCinsCC	GG	TT	AA	CC	GG
insCCinsCC	GG	TT	AA	CC	GG
insCCinsCC	GG	TT	AA	CC	GG
insCCinsCC	GG	TT	AA	CC	GG
insCCinsCC	GG	TT	AA	CC	GG
insCCinsCC	GG	TT	AA	CC	GG
insCCinsCC	GG	TT	AA	CC	GG
insCCinsCC	GG	TT	AA	CC	GG
insCCinsCC	GG	TT	AA	CC	GG
insCCinsCC	GG	TT	AA	CC	GG
insCCinsCC	GG	TT	AA	CC	GG
insCCinsCC	GG	TT	AA	CC	GG
insCCinsCC	GG	TT	AA	CC	GG

## Sheet: Hoja2
ACACA:c.5634T>C	CT	CT	TT	TT	CC	CT	CT	CC	CC	CT	CT	CC	CT	CT	TT	CC	TT	TT	TT	TT	CT	TT	TT	TT	CT	TT	TT	CT	CT	TT	CT	CC	CC	CT	CT	TT	CC	TT	TT	CT	CT	CC	CT	TT	CC	CC	TT	CC	CC
ACSL4:c.2645G>A	GG	AA	AA	AA	GA	GG	AA	AA	AA	GA	GA	GA	AA	GA	GA	GG	AA	AA	AA	GG	GG	GG	GA	GG	GA	GA	AA	AA	GG	GA	GG	GG	GA	GA	AA	GA	GG	AA	GA	GG	AA	AA	AA	GA	GG	GG	GA	AA	GG
ADIPOQ:c.1735G>A	GG	GG	GG	GG	GA	GG	GG	GG	GG	GG	GA	GG	GG	GG	GG	GG	GG	GG	GG	GG	GG	GG	GG	GG	GG	GG	GG	GG	GG	GG	GG	GG	GG	GG	GG	GG	GG	GG	GG	GG	GG	GG	GG	GG	GG	GG	GG	GG	GG
AHR:c.2149G>T	TT	TT	TT	GT	GT	TT	TT	TT	TT	TT	GG	TT	TT	TT	TT	TT	TT	TT	TT	TT	TT	TT	TT	TT	TT	TT	TT	TT	TT	TT	TT	TT	TT	TT	TT	TT	TT	TT	TT	TT	TT	TT	TT	TT	TT	TT	GT	TT	GG
CAPNS1:c.429A>C	CC	CC	AA	AC	AC	AC	CC	CC	CC	AC	CC	AC	CC	AC	AC	AC	CC	CC	AC	AC	AC	CC	AC	AC	CC	AC	CC	AC	AA	AC	AC	AC	AC	AA	AC	CC	AA	AC	AC	AC	AA	AA	AA	CC	AA	AC	AA	AC	AC
CAST:g.103299934G>A	NA	AA	GA	NA	AA	AA	AA	GG	NA	AA	AA	AA	GG	NA	AA	NA	AA	AA	NA	GG	AA	NA	AA	NA	NA	NA	GG	AA	AA	NA	GG	AA	AA	AA	GA	AA	AA	NA	NA	NA	NA	AA	NA	AA	AA	AA	NA	NA	NA
CYB5Ag.149737752G>T	TT	GT	GG	GG	GG	GT	TT	GT	TT	GT	GT	GT	GT	GG	GT	GT	GT	TT	GT	GT	GT	GG	TT	GT	GT	GT	GT	GG	GT	GT	TT	GT	TT	TT	TT	GT	GG	TT	TT	GT	GG	GT	GG	GG	GG	GG	GT	TT	GG
CYP2E1:g. 141690107C>T	CC	CC	CC	CC	CC	CC	CC	CC	CC	CC	CC	CC	CC	CC	CC	CC	CC	CC	CC	CC	CC	CC	CC	CC	CC	CC	CC	CC	CC	CC	CT	CC	CC	CC	CC	CC	CC	CC	CC	CC	CC	CC	CC	CC	CC	CT	CC	CC	CC
ESR1:c.669T>C	AA	AA	AA	AA	AA	AA	AA	AA	AA	AA	AA	AA	AA	AA	AA	AA	AA	AA	AA	AA	AA	AA	AA	AA	AA	AA	AA	AA	AA	AA	AA	AA	AA	AA	AA	AA	AA	AA	AA	AA	AA	AA	AA	AA	AA	AA	AA	AA	AA
FASN:g.926299G>A	GA	AA	AA	GA	GA	AA	AA	AA	AA	AA	GA	GA	NA	GA	AA	AA	NA	AA	AA	GA	AA	AA	NA	AA	GA	GA	NA	AA	AA	AA	AA	NA	AA	AA	GA	GA	NA	NA	AA	AA	AA	AA	GA	AA	AA	GA	GA	AA	GA
FTO:g. 31460242A>T	TT	AT	AT	TT	TT	TT	AT	AT	AT	AT	AT	AT	AT	AA	AT	TT	TT	AA	AT	AT	AT	AT	TT	AT	AT	AA	AT	TT	TT	TT	TT	TT	AT	AA	TT	TT	AT	AT	TT	TT	AT	TT	TT	TT	TT	TT	AA	TT	TT
FUT1:g.54079560T>C	CC	CC	CC	TC	CC	TC	CC	CC	CC	TC	CC	CC	CC	CC	TC	CC	CC	CC	CC	CC	CC	CC	CC	CC	CC	CC	CC	CC	CC	CC	CC	CC	CC	CC	CC	CC	CC	CC	CC	CC	CC	CC	TC	TC	CC	CC	CC	TC	CC
GBP5:g.127301202G>T	GG	GG	GG	GG	GG	GG	GG	GG	GG	GG	GG	GG	GT	GG	GG	GG	GG	GG	GG	GG	GG	GG	GG	GG	GG	GG	GG	GG	GG	GG	GG	GG	GG	GG	GT	GG	GG	GG	GG	GG	GG	GG	GG	GG	GG	GG	GG	GG	GT
IGF2:g. 1483832G>A	GG	GG	GG	GG	GG	GG	GG	GG	GG	GG	GG	GG	GG	GG	GG	GG	GG	GG	GG	GG	GG	GG	GG	GG	GG	GG	GG	GG	GG	GG	GG	GG	GG	GG	GG	GG	GG	GG	GG	GG	GG	GG	GG	GG	GG	GG	GG	GG	AG
KIT:g. 41488472C>T	CC	CC	CC	CC	CC	CC	CC	CC	CC	CC	CC	CC	CC	CC	CC	CC	CC	CC	CC	CC	CC	CC	CC	CC	CC	CC	CC	CC	CC	CC	CC	CC	CC	CC	CC	CC	CC	CC	CC	CC	CC	CC	CC	CC	CC	CC	CC	CC	CC
LEP:g.20111759A>G	CC	CT	TT	CT	TT	TT	TT	TT	TT	CC	CT	TT	TT	TT	TT	TT	TT	TT	CT	TT	TT	CT	CT	TT	TT	TT	TT	TT	CT	TT	TT	TT	TT	CT	TT	TT	TT	CT	TT	TT	TT	TT	CT	TT	TT	CT	TT	TT	CC
LEPR:c.1987C>T	TT	TT	TT	TT	TT	TT	TT	TT	TT	TT	TT	TT	TT	TT	TT	TT	TT	TT	TT	TT	TT	TT	TT	TT	TT	TT	TT	TT	TT	TT	TT	TT	TT	TT	CT	TT	TT	CT	TT	TT	TT	TT	TT	TT	TT	TT	TT	TT	CC
MC1R:g. 181905G>A	GG	GG	GG	GG	GG	GG	GG	GG	GG	GG	GG	GG	GG	GG	GG	GG	GG	GG	GG	GG	GG	GG	GG	GG	GG	GG	GG	GG	GG	GG	GG	GG	GG	GG	GG	GG	GG	GG	GG	GG	GG	GG	GG	GG	GG	GG	GG	GA	GG
MC1R:g.181461G>A	GG	GG	GG	GG	GG	GG	GG	GG	GG	GG	GG	GG	GG	GG	GG	GG	GG	GG	GG	GG	GG	GG	GG	GG	GG	GG	GG	GG	GG	GG	GG	GG	GG	GG	GG	GG	GG	GG	GG	GG	GG	GG	GG	GG	GG	GG	GG	GG	GG
MC1R:g.181697C>T	CC	CC	CC	CC	CC	CC	CC	CC	CC	CC	CC	CC	CC	CC	CC	CC	CC	CC	CC	CC	CC	CC	CC	CC	CC	CC	CC	CC	CC	CC	CC	CC	CC	CC	CC	CC	CC	CC	CC	CC	CC	CC	CC	CC	CC	CC	CC	CC	CC
MC1R:g.181818G>A	GA	AA	AA	GA	AA	AA	AA	AA	AA	GA	AA	GA	GA	AA	AA	AA	GA	GA	AA	AA	GG	AA	GA	AA	AA	GA	AA	AA	GA	GG	AA	GA	GA	AA	AA	GA	GA	GA	GA	AA	AA	AA	GA	AA	AA	GA	GA	GA	AA
MC1R:g.181825T>C	TT	TT	TT	TT	TT	TT	TT	TT	TT	TT	TT	TT	TT	TT	TT	TT	TT	TT	TT	TT	TT	TT	TT	TT	TT	TT	TT	TT	TT	TT	TT	TT	TT	TT	TT	TT	TT	TT	TT	TT	TT	TT	TT	TT	TT	TT	TT	TC	TT
MC1R:g.182126CC>*	insCCinsCC	insCCinsCC	insCCinsCC	insCCinsCC	insCCdel--	insCCinsCC	del--del--	insCCinsCC	insCCdel--	insCCinsCC	insCCdel--	insCCinsCC	insCCinsCC	insCCinsCC	insCCinsCC	insCCinsCC	insCCinsCC	insCCinsCC	insCCinsCC	insCCinsCC	insCCinsCC	insCCinsCC	insCCinsCC	insCCinsCC	insCCinsCC	insCCinsCC	insCCinsCC	insCCinsCC	insCCinsCC	insCCinsCC	insCCdel--	insCCinsCC	insCCinsCC	insCCinsCC	insCCinsCC	insCCinsCC	insCCinsCC	insCCdel--	insCCinsCC	insCCinsCC	insCCdel--	insCCinsCC	insCCinsCC	insCCinsCC	insCCinsCC	insCCinsCC	insCCinsCC	del--del--	del--del--
MC4R:c.892G>A	GG	GG	GG	GG	GG	GG	GG	GG	GG	GG	GA	GG	GG	GG	GG	GA	GG	GG	GG	GG	GG	GG	GG	GG	GG	GG	GG	GG	GG	GG	GG	GG	GG	GG	GG	GG	GG	GG	GG	GG	GG	GG	GG	GG	GG	GG	GG	GG	GA
MSTN:g.94629248C>T	AG	AA	AG	AG	AG	AG	AA	AA	AA	AG	GG	AA	AA	AA	AA	AA	AA	AA	AG	AA	AA	AA	AA	AA	AA	AA	AG	AG	AG	AG	AG	AA	AA	AA	AA	AG	AA	AG	AA	AG	AA	AA	GG	AA	AA	AA	AA	AA	GG
MTTP:c.2573T>C	CC	CC	CC	CT	CT	CT	CT	CC	CT	CC	CT	CT	CT	CT	CC	CT	CC	CT	CC	CT	TT	CT	CT	TT	CT	TT	CT	CT	TT	CT	CT	CC	CT	TT	CT	CT	TT	CT	CT	CC	TT	CT	CC	CC	CT	CT	CT	TT	CC
MUC4:g.134226654C>G	CC	CC	CC	CC	CC	CC	CC	CC	CC	CC	CC	CC	CC	CC	CC	CC	CC	CC	CC	CC	CC	CC	CC	CC	CC	CC	CC	CC	CC	CC	CC	CC	CC	CC	CC	CC	CC	CC	CC	CC	CC	CC	CC	CC	CC	CC	CC	CC	CC
NR6A1:C.748T>C	TT	TT	TT	TT	TT	TT	TT	TT	TT	TT	TT	TT	TT	TC	TT	TT	TT	TT	TC	TC	TT	TT	TT	NA	TT	TC	TC	TC	TT	TT	TT	TT	TT	TC	CC	TT	TT	TC	TT	TT	TT	TC	TT	TC	TC	TC	TT	TT	TT
PCK1:c.2456A>C	AA	NA	AC	AA	AA	AA	AA	AC	AA	AA	AA	AA	AC	AA	AA	AA	AA	AA	AA	AA	AA	AA	AA	AA	NA	AA	AA	AA	AA	AA	AA	AA	AA	AA	AA	NA	AA	AA	AA	AA	AA	AA	AA	AA	AA	AA	NA	AA	AC
PHKG1:g. 16830320C>A	CC	CC	CC	CC	CC	CC	CC	CC	CC	CC	CC	CC	CC	CC	CC	CC	CC	CC	CC	NA	CC	CC	CC	CC	CC	CC	CC	CC	CC	CC	CC	CC	CC	CC	CC	CC	CC	CC	CC	CC	CC	CC	CC	CC	CC	CC	CC	CC	NA
PPARD:g.31281804G>A	GG	GG	GG	GG	GG	GG	GG	GG	GG	GG	GG	GG	GG	GG	GG	GG	GG	GG	GG	GG	GG	GG	GG	GG	GG	GG	GG	GG	GG	GG	GG	GG	GG	GG	GG	GG	GG	GG	GG	GG	GG	GG	GG	GG	GG	GG	GG	GG	GG
PPARGC1:c.1288T>A	AA	AA	AA	AA	AA	AA	AA	AA	AA	AA	AA	TA	AA	AA	AA	TA	AA	AA	AA	AA	AA	AA	AA	AA	AA	AA	AA	AA	AA	TA	AA	AA	AA	AA	AA	AA	AA	AA	AA	AA	AA	AA	AA	AA	AA	AA	AA	AA	TT
PRKAG3:g. 120863533G>A	GG	GG	GG	GG	GG	GG	GG	GG	GG	GG	GG	GG	GG	GG	GG	GG	GG	GG	GG	GG	GG	GG	GG	GG	GG	GG	GG	GG	GG	GG	GG	GG	GG	GG	GG	GG	GG	GG	GG	GG	GG	GG	GG	GG	GG	GG	GG	GG	GG
PRKAG3:g. 120863537G>A	GA	GA	AA	GA	AA	AA	AA	AA	AA	GA	AA	AA	AA	AA	GA	AA	AA	GA	GG	GA	GA	GA	AA	GA	GG	AA	GG	GA	GG	GG	GA	GA	GA	AA	AA	GA	GA	GA	AA	AA	AA	AA	AA	AA	AA	AA	GA	GA	GA
RYR1:c.1843C>T	CC	CC	CC	CC	CC	CC	CC	CC	CC	CC	CC	CC	CC	CC	CC	CC	CC	CC	CC	CC	CC	CC	CC	CC	CC	CC	CC	CC	CC	CC	CC	CC	CC	CC	CC	CC	CC	CC	CC	CC	CC	CC	CC	CC	CC	CC	CC	CC	CC
SCD:g.111461751C>T	TT	TT	TT	TT	TT	TT	TT	TT	TT	TT	TT	TT	TT	TT	TT	TT	TT	TT	TT	TT	TT	TT	TT	TT	TT	TT	TT	TT	TT	TT	TT	TT	TT	TT	TT	TT	TT	TT	TT	TT	TT	TT	TT	TT	TT	TT	TT	TT	TT
TAS2R39:g.7068883T>G	CC	CC	CC	CC	CC	CC	AC	CC	CC	CC	CC	CC	CC	CC	CC	CC	CC	CC	CC	CC	CC	CC	CC	CC	CC	CC	CC	CC	CC	CC	CC	CC	CC	CC	CC	CC	CC	CC	CC	CC	CC	CC	CC	CC	CC	CC	CC	CC	CC
TAS2R4:g.8135115A>T	AA	AA	AA	AA	AA	AA	AA	AA	AA	AA	AA	AA	AA	AA	AA	AA	AA	AA	AA	AA	AA	AA	AA	AA	AA	AA	AA	AA	AA	AA	AA	AA	AA	AA	AA	AA	AA	AA	AA	AA	AA	AA	AA	AA	AA	AA	AA	AA	AA
TYRP1:g.209733431A>G	AA	AA	AA	AA	AA	AA	AA	AA	AA	AA	AA	AA	AA	AA	AA	AA	AA	AA	AA	AA	AA	AA	AA	AA	AA	AA	AA	AA	AA	AA	AA	AA	AA	AA	AA	AA	AA	AA	AA	AA	AA	AA	AA	AA	AA	AA	AA	AA	AA
[truncated: 902 more columns]

## Sheet: Hoja3
ID	BREED	ACACA:c.5634T>C	ACSL4:c.2645G>A	ADIPOQ:c.1735G>A	AHR:c.2149G>T	CAPNS1:c.429A>C	CAST:g.103299934G>A	CYB5A:g.149737752G>T	CYP2E1:g. 141690107C>T	ESR1:c.669T>C	FASN:g.926299G>A	FTO:g. 31460242A>T	FUT1:g.54079560T>C	GBP5:g.127301202G>T	IGF2:g. 1483832G>A	KIT:g. 41488472C>T	LEP:g.20111759A>G	LEPR:c.1987C>T	MC1R:g. 181905G>A	MC1R:g.181461G>A	MC1R:g.181697C>T	MC1R:g.181818G>A	MC1R:g.181825T>C	MC1R:g.182126CC>*	MC4R:c.892G>A	MSTN:g.94629248C>T	MTTP:c.2573T>C	MUC4:g.134226654C>G	NR6A1:C.748T>C	PCK1:c.2456A>C	PHKG1:g. 16830320C>A	PPARD:g.31281804G>A	PPARGC1:c.1288T>A	PRKAG3:g. 120863533G>A	PRKAG3:g. 120863537G>A	RYR1:c.1843C>T	SCD:g.111461751C>T	TAS2R39:g.7068883T>G	TAS2R4:g.8135115A>T	TYRP1:g.209733431A>G
1	Alentejana	CT	GG	GG	TT	CC	NA	TT	CC	AA	GA	TT	CC	GG	GG	CC	GG	TT	GG	GG	CC	GA	TT	insCCinsCC	GG	TC	CC	CC	TT	AA	CC	GG	AA	GG	GA	CC	TT	GG	AA	AA
2	Alentejana	CT	AA	GG	TT	CC	AA	GT	CC	AA	AA	AT	CC	GG	GG	CC	GA	TT	GG	GG	CC	AA	TT	insCCinsCC	GG	TT	CC	CC	TT	NA	CC	GG	AA	GG	GA	CC	TT	GG	AA	AA
3	Alentejana	TT	AA	GG	TT	AA	GA	GG	CC	AA	AA	AT	CC	GG	GG	CC	AA	TT	GG	GG	CC	AA	TT	insCCinsCC	GG	TC	CC	CC	TT	AC	CC	GG	AA	GG	AA	CC	TT	GG	AA	AA
4	Alentejana	TT	AA	GG	GT	AC	NA	GG	CC	AA	GA	TT	TC	GG	GG	CC	GA	TT	GG	GG	CC	GA	TT	insCCinsCC	GG	TC	CT	CC	TT	AA	CC	GG	AA	GG	GA	CC	TT	GG	AA	AA
5	Alentejana	CC	GA	GA	GT	AC	AA	GG	CC	AA	GA	TT	CC	GG	GG	CC	AA	TT	GG	GG	CC	AA	TT	insCCdel--	GG	TC	CT	CC	TT	AA	CC	GG	AA	GG	AA	CC	TT	GG	AA	AA
6	Alentejana	CT	GG	GG	TT	AC	AA	GT	CC	AA	AA	TT	TC	GG	GG	CC	AA	TT	GG	GG	CC	AA	TT	insCCinsCC	GG	TC	CT	CC	TT	AA	CC	GG	AA	GG	AA	CC	TT	GG	AA	AA
7	Alentejana	CT	AA	GG	TT	CC	AA	TT	CC	AA	AA	AT	CC	GG	GG	CC	AA	TT	GG	GG	CC	AA	TT	del--del--	GG	TT	CT	CC	TT	AA	CC	GG	AA	GG	AA	CC	TT	TG	AA	AA
8	Alentejana	CC	AA	GG	TT	CC	GG	GT	CC	AA	AA	AT	CC	GG	GG	CC	AA	TT	GG	GG	CC	AA	TT	insCCinsCC	GG	TT	CC	CC	TT	AC	CC	GG	AA	GG	AA	CC	TT	GG	AA	AA
9	Alentejana	CC	AA	GG	TT	CC	NA	TT	CC	AA	AA	AT	CC	GG	GG	CC	AA	TT	GG	GG	CC	AA	TT	insCCdel--	GG	TT	CT	CC	TT	AA	CC	GG	AA	GG	AA	CC	TT	GG	AA	AA
10	Alentejana	CT	GA	GG	TT	AC	AA	GT	CC	AA	AA	AT	TC	GG	GG	CC	GG	TT	GG	GG	CC	GA	TT	insCCinsCC	GG	TC	CC	CC	TT	AA	CC	GG	AA	GG	GA	CC	TT	GG	AA	AA
11	Alentejana	CT	GA	GA	GG	CC	AA	GT	CC	AA	GA	AT	CC	GG	GG	CC	GA	TT	GG	GG	CC	AA	TT	insCCdel--	GA	CC	CT	CC	TT	AA	CC	GG	AA	GG	AA	CC	TT	GG	AA	AA
12	Alentejana	CC	GA	GG	TT	AC	AA	GT	CC	AA	GA	AT	CC	GG	GG	CC	AA	TT	GG	GG	CC	GA	TT	insCCinsCC	GG	TT	CT	CC	TT	AA	CC	GG	TA	GG	AA	CC	TT	GG	AA	AA
13	Alentejana	CT	AA	GG	TT	CC	GG	GT	CC	AA	NA	AT	CC	GT	GG	CC	AA	TT	GG	GG	CC	GA	TT	insCCinsCC	GG	TT	CT	CC	TT	AC	CC	GG	AA	GG	AA	CC	TT	GG	AA	AA
14	Alentejana	CT	GA	GG	TT	AC	NA	GG	CC	AA	GA	AA	CC	GG	GG	CC	AA	TT	GG	GG	CC	AA	TT	insCCinsCC	GG	TT	CT	CC	TC	AA	CC	GG	AA	GG	AA	CC	TT	GG	AA	AA
15	Alentejana	TT	GA	GG	TT	AC	AA	GT	CC	AA	AA	AT	TC	GG	GG	CC	AA	TT	GG	GG	CC	AA	TT	insCCinsCC	GG	TT	CC	CC	TT	AA	CC	GG	AA	GG	GA	CC	TT	GG	AA	AA
16	Alentejana	CC	GG	GG	TT	AC	NA	GT	CC	AA	AA	TT	CC	GG	GG	CC	AA	TT	GG	GG	CC	AA	TT	insCCinsCC	GA	TT	CT	CC	TT	AA	CC	GG	TA	GG	AA	CC	TT	GG	AA	AA
17	Alentejana	TT	AA	GG	TT	CC	AA	GT	CC	AA	NA	TT	CC	GG	GG	CC	AA	TT	GG	GG	CC	GA	TT	insCCinsCC	GG	TT	CC	CC	TT	AA	CC	GG	AA	GG	AA	CC	TT	GG	AA	AA
18	Alentejana	TT	AA	GG	TT	CC	AA	TT	CC	AA	AA	AA	CC	GG	GG	CC	AA	TT	GG	GG	CC	GA	TT	insCCinsCC	GG	TT	CT	CC	TT	AA	CC	GG	AA	GG	GA	CC	TT	GG	AA	AA
19	Alentejana	TT	AA	GG	TT	AC	NA	GT	CC	AA	AA	AT	CC	GG	GG	CC	GA	TT	GG	GG	CC	AA	TT	insCCinsCC	GG	TC	CC	CC	TC	AA	CC	GG	AA	GG	GG	CC	TT	GG	AA	AA
20	Alentejana	TT	GG	GG	TT	AC	GG	GT	CC	AA	GA	AT	CC	GG	GG	CC	AA	TT	GG	GG	CC	AA	TT	insCCinsCC	GG	TT	CT	CC	TC	AA	NA	GG	AA	GG	GA	CC	TT	GG	AA	AA
21	Alentejana	CT	GG	GG	TT	AC	AA	GT	CC	AA	AA	AT	CC	GG	GG	CC	AA	TT	GG	GG	CC	GG	TT	insCCinsCC	GG	TT	TT	CC	TT	AA	CC	GG	AA	GG	GA	CC	TT	GG	AA	AA
22	Alentejana	TT	GG	GG	TT	CC	NA	GG	CC	AA	AA	AT	CC	GG	GG	CC	GA	TT	GG	GG	CC	AA	TT	insCCinsCC	GG	TT	CT	CC	TT	AA	CC	GG	AA	GG	GA	CC	TT	GG	AA	AA
23	Alentejana	TT	GA	GG	TT	AC	AA	TT	CC	AA	NA	TT	CC	GG	GG	CC	GA	TT	GG	GG	CC	GA	TT	insCCinsCC	GG	TT	CT	CC	TT	AA	CC	GG	AA	GG	AA	CC	TT	GG	AA	AA
24	Alentejana	TT	GG	GG	TT	AC	NA	GT	CC	AA	AA	AT	CC	GG	GG	CC	AA	TT	GG	GG	CC	AA	TT	insCCinsCC	GG	TT	TT	CC	NA	AA	CC	GG	AA	GG	GA	CC	TT	GG	AA	AA
25	Alentejana	CT	GA	GG	TT	CC	NA	GT	CC	AA	GA	AT	CC	GG	GG	CC	AA	TT	GG	GG	CC	AA	TT	insCCinsCC	GG	TT	CT	CC	TT	NA	CC	GG	AA	GG	GG	CC	TT	GG	AA	AA
26	Alentejana	TT	GA	GG	TT	AC	NA	GT	CC	AA	GA	AA	CC	GG	GG	CC	AA	TT	GG	GG	CC	GA	TT	insCCinsCC	GG	TT	TT	CC	TC	AA	CC	GG	AA	GG	AA	CC	TT	GG	AA	AA
27	Alentejana	TT	AA	GG	TT	CC	GG	GT	CC	AA	NA	AT	CC	GG	GG	CC	AA	TT	GG	GG	CC	AA	TT	insCCinsCC	GG	TC	CT	CC	TC	AA	CC	GG	AA	GG	GG	CC	TT	GG	AA	AA
28	Alentejana	CT	AA	GG	TT	AC	AA	GG	CC	AA	AA	TT	CC	GG	GG	CC	AA	TT	GG	GG	CC	AA	TT	insCCinsCC	GG	TC	CT	CC	TC	AA	CC	GG	AA	GG	GA	CC	TT	GG	AA	AA
29	Alentejana	CT	GG	GG	TT	AA	AA	GT	CC	AA	AA	TT	CC	GG	GG	CC	GA	TT	GG	GG	CC	GA	TT	insCCinsCC	GG	TC	TT	CC	TT	AA	CC	GG	AA	GG	GG	CC	TT	GG	AA	AA
30	Alentejana	TT	GA	GG	TT	AC	NA	GT	CC	AA	AA	TT	CC	GG	GG	CC	AA	TT	GG	GG	CC	GG	TT	insCCinsCC	GG	TC	CT	CC	TT	AA	CC	GG	TA	GG	GG	CC	TT	GG	AA	AA
31	Alentejana	CT	GG	GG	TT	AC	GG	TT	CT	AA	AA	TT	CC	GG	GG	CC	AA	TT	GG	GG	CC	AA	TT	insCCdel--	GG	TC	CT	CC	TT	AA	CC	GG	AA	GG	GA	CC	TT	GG	AA	AA
32	Alentejana	CC	GG	GG	TT	AC	AA	GT	CC	AA	NA	TT	CC	GG	GG	CC	AA	TT	GG	GG	CC	GA	TT	insCCinsCC	GG	TT	CC	CC	TT	AA	CC	GG	AA	GG	GA	CC	TT	GG	AA	AA
33	Alentejana	CC	GA	GG	TT	AC	AA	TT	CC	AA	AA	AT	CC	GG	GG	CC	AA	TT	GG	GG	CC	GA	TT	insCCinsCC	GG	TT	CT	CC	TT	AA	CC	GG	AA	GG	GA	CC	TT	GG	AA	AA
34	Alentejana	CT	GA	GG	TT	AA	AA	TT	CC	AA	AA	AA	CC	GG	GG	CC	GA	TT	GG	GG	CC	AA	TT	insCCinsCC	GG	TT	TT	CC	TC	AA	CC	GG	AA	GG	AA	CC	TT	GG	AA	AA
35	Alentejana	CT	AA	GG	TT	AC	GA	TT	CC	AA	GA	TT	CC	GT	GG	CC	AA	CT	GG	GG	CC	AA	TT	insCCinsCC	GG	TT	CT	CC	CC	AA	CC	GG	AA	GG	AA	CC	TT	GG	AA	AA
36	Alentejana	TT	GA	GG	TT	CC	AA	GT	CC	AA	GA	TT	CC	GG	GG	CC	AA	TT	GG	GG	CC	GA	TT	insCCinsCC	GG	TC	CT	CC	TT	NA	CC	GG	AA	GG	GA	CC	TT	GG	AA	AA
37	Alentejana	CC	GG	GG	TT	AA	AA	GG	CC	AA	NA	AT	CC	GG	GG	CC	AA	TT	GG	GG	CC	GA	TT	insCCinsCC	GG	TT	TT	CC	TT	AA	CC	GG	AA	GG	GA	CC	TT	GG	AA	AA
38	Alentejana	TT	AA	GG	TT	AC	NA	TT	CC	AA	NA	AT	CC	GG	GG	CC	GA	CT	GG	GG	CC	GA	TT	insCCdel--	GG	TC	CT	CC	TC	AA	CC	GG	AA	GG	GA	CC	TT	GG	AA	AA
39	Alentejana	TT	GA	GG	TT	AC	NA	TT	CC	AA	AA	TT	CC	GG	GG	CC	AA	TT	GG	GG	CC	GA	TT	insCCinsCC	GG	TT	CT	CC	TT	AA	CC	GG	AA	GG	AA	CC	TT	GG	AA	AA
40	Alentejana	CT	GG	GG	TT	AC	NA	GT	CC	AA	AA	TT	CC	GG	GG	CC	AA	TT	GG	GG	CC	AA	TT	insCCinsCC	GG	TC	CC	CC	TT	AA	CC	GG	AA	GG	AA	CC	TT	GG	AA	AA
41	Alentejana	CT	AA	GG	TT	AA	NA	GG	CC	AA	AA	AT	CC	GG	GG	CC	AA	TT	GG	GG	CC	AA	TT	insCCdel--	GG	TT	TT	CC	TT	AA	CC	GG	AA	GG	AA	CC	TT	GG	AA	AA
42	Alentejana	CC	AA	GG	TT	AA	AA	GT	CC	AA	AA	TT	CC	GG	GG	CC	AA	TT	GG	GG	CC	AA	TT	insCCinsCC	GG	TT	CT	CC	TC	AA	CC	GG	AA	GG	AA	CC	TT	GG	AA	AA
43	Alentejana	CT	AA	GG	TT	AA	NA	GG	CC	AA	GA	TT	TC	GG	GG	CC	GA	TT	GG	GG	CC	GA	TT	insCCinsCC	GG	CC	CC	CC	TT	AA	CC	GG	AA	GG	AA	CC	TT	GG	AA	AA
44	Alentejana	TT	GA	GG	TT	CC	AA	GG	CC	AA	AA	TT	TC	GG	GG	CC	AA	TT	GG	GG	CC	AA	TT	insCCinsCC	GG	TT	CC	CC	TC	AA	CC	GG	AA	GG	AA	CC	TT	GG	AA	AA
45	Alentejana	CC	GG	GG	TT	AA	AA	GG	CC	AA	AA	TT	CC	GG	GG	CC	AA	TT	GG	GG	CC	AA	TT	insCCinsCC	GG	TT	CT	CC	TC	AA	CC	GG	AA	GG	AA	CC	TT	GG	AA	AA
46	Alentejana	CC	GG	GG	TT	AC	AA	GG	CT	AA	GA	TT	CC	GG	GG	CC	GA	TT	GG	GG	CC	GA	TT	insCCinsCC	GG	TT	CT	CC	TC	AA	CC	GG	AA	GG	AA	CC	TT	GG	AA	AA
47	Alentejana	TT	GA	GG	GT	AA	NA	GT	CC	AA	GA	AA	CC	GG	GG	CC	AA	TT	GG	GG	CC	GA	TT	insCCinsCC	GG	TT	CT	CC	TT	NA	CC	GG	AA	GG	GA	CC	TT	GG	AA	AA
48	Alentejana	CC	AA	GG	TT	AC	NA	TT	CC	AA	AA	TT	TC	GG	GG	CC	AA	TT	GA	GG	CC	GA	TC	del--del--	GG	TT	TT	CC	TT	AA	CC	GG	AA	GG	GA	CC	TT	GG	AA	AA
49	Apulo Calabrese	CC	GG	GG	GG	AC	NA	GG	CC	AA	GA	TT	CC	GT	AG	CC	GG	CC	GG	GG	CC	AA	TT	del--del--	GA	CC	CC	CC	TT	AC	NA	GG	TT	GG	GA	CC	TT	GG	AA	AA
50	Apulo Calabrese	CT	GG	NA	GT	CC	GA	GG	CC	AA	GG	TT	CC	GT	AA	CC	GG	CC	GG	GG	CC	AA	TT	del--del--	GA	CC	CT	CC	TC	AC	CA	GG	TA	GG	AA	CC	TT	GG	AA	AA
51	Apulo Calabrese	TT	AA	GG	GG	AA	GG	GG	CC	AA	AA	TT	TC	GG	AA	CC	GA	CC	GG	GG	CC	AA	TT	del--del--	GG	CC	TT	CC	TT	AA	AA	GG	TT	GG	GA	TC	CC	GG	AA	AA
52	Apulo Calabrese	CT	AA	GG	GG	AC	GG	GG	CC	AA	GG	TT	CC	GG	AG	CC	GG	CC	GG	GG	CC	AA	TT	insCCdel--	GG	CC	CT	CC	TT	CC	CA	GG	TT	GG	AA	CC	TC	GG	AA	AA
53	Apulo Calabrese	CT	GG	GG	GG	CC	GA	GG	CC	AA	NA	TT	CC	GG	AA	CC	GG	CT	GG	GG	CC	AA	TT	del--del--	GA	CC	CC	CG	TC	CC	CC	GG	TA	GG	AA	CC	TT	GG	AA	AA
54	Apulo Calabrese	NA	NA	NA	NA	CC	AA	GG	CC	AA	NA	TT	NA	GT	AA	NA	GA	NA	GG	NA	NA	AA	NA	del--del--	GG	NA	TT	CC	TC	CC	CC	GG	TA	NA	NA	CC	TT	GG	AA	AA
55	Apulo Calabrese	CC	GA	GG	GT	CC	GG	GG	CC	AA	GA	AT	CC	GG	AA	CC	GA	CC	GG	GG	CC	AA	TT	insCCdel--	GG	CC	TT	CC	TT	NA	AA	GG	TT	GG	GG	CC	TC	GG	AA	AA
56	Apulo Calabrese	CC	GG	GG	GT	CC	GA	GG	CC	AA	NA	AA	CC	GG	AA	CC	GG	CC	GG	GG	CC	AA	TT	del--del--	GG	TC	TT	CG	TC	AA	AA	GG	TT	GG	AA	CC	TC	GG	AA	AA
57	Apulo Calabrese	CT	GG	GG	GG	CC	GG	GG	CC	AA	GG	AT	CC	GT	AA	CC	GG	CC	GG	GG	CC	AA	TT	del--del--	GG	CC	CT	CG	TC	CC	NA	GG	TA	GG	AA	CC	TT	GG	AA	AA
58	Apulo Calabrese	CC	GA	GG	GG	CC	GA	GG	CC	AA	NA	TT	CC	GT	AG	CC	GG	CC	GG	GG	CC	AA	TT	del--del--	GA	CC	CT	CG	TT	CC	CA	GG	TA	GG	GA	CC	TT	GG	AA	AA
59	Apulo Calabrese	TT	GG	GG	GG	CC	GG	GG	CC	AA	GA	TT	CC	GG	AA	CC	GG	CC	GG	GG	CC	AA	TT	del--del--	GG	CC	CC	CC	TT	CC	NA	GG	TA	GG	GA	CC	TC	GG	AA	AA
60	Apulo Calabrese	CT	AA	GG	GT	AA	GG	GG	CC	AA	GA	TT	CC	GG	AA	CC	GG	CC	GG	GG	CC	AA	TT	del--del--	GG	CC	TT	CC	TC	AA	AA	GG	TT	GG	AA	CC	CC	GG	AA	AA
61	Apulo Calabrese	CC	GG	GG	GT	AC	GA	GG	CC	AA	GA	TT	CC	GT	AA	CC	GG	CC	GG	GG	CC	AA	TT	del--del--	GA	CC	CC	CC	TT	AC	CC	GG	TT	GG	AA	CC	TT	GG	AA	AA
62	Apulo Calabrese	CC	GG	GG	GT	CC	AA	GG	CC	AA	GA	TT	CC	GT	AA	CC	GA	CC	GG	GG	CC	AA	TT	del--del--	GG	CC	CT	CC	TT	AC	CC	GG	TT	GG	AA	CC	TT	GG	AA	AA
63	Apulo Calabrese	CC	GG	GG	GT	AC	GA	GG	CC	AA	GA	TT	CC	GG	AG	CC	GG	CC	GG	GG	CC	AA	TT	del--del--	GA	CC	CC	CC	TT	AC	CC	GG	TT	GG	GA	CC	TT	GG	AA	AA
64	Apulo Calabrese	TT	GG	GG	GT	CC	GG	GG	CC	AA	NA	TT	CC	GG	AA	CC	GA	TT	GG	GG	CC	AA	TT	del--del--	AA	CC	CT	CC	TC	AC	NA	GG	TA	GG	GA	CC	TC	GG	AA	AA
65	Apulo Calabrese	CC	GG	GG	GT	CC	GA	GG	CC	AA	AA	TT	CC	GG	AA	CC	GA	TT	GG	GG	CC	AA	TT	del--del--	AA	TC	CT	CC	TT	AC	CC	GG	TA	GG	GA	CC	TT	GG	AA	NA
66	Apulo Calabrese	TT	GG	GG	GT	CC	GA	GG	CC	AA	GA	TT	CC	GG	AA	CC	GG	TT	GG	GG	CC	AA	TT	del--del--	GG	CC	TT	CC	TT	AA	CC	GG	TA	GG	GG	CC	TC	GG	AA	AA
67	Apulo Calabrese	CC	GG	GG	GT	CC	GA	GG	CC	AA	NA	TT	CC	GG	AA	CC	GA	TT	GG	GG	CC	AA	TT	del--del--	GA	TC	CT	CG	TT	AA	CC	GG	TA	GG	GG	CC	TT	GG	AA	AA
68	Apulo Calabrese	CC	GG	GG	NA	AA	GG	GG	CT	AA	NA	AT	NA	GG	AA	CC	GA	CC	GG	NA	NA	AA	TT	del--del--	GA	TC	TT	CG	NA	AC	CC	GG	TA	NA	GA	CC	TT	GG	AA	AA
69	Apulo Calabrese	TT	AA	GG	GG	CC	AA	GG	CC	AA	GA	TT	CC	GG	AA	CC	GA	TT	GG	GG	CC	AA	TT	del--del--	GA	CC	CC	CC	TT	AA	NA	GG	TA	GG	GA	CC	TT	GG	AA	AA
70	Apulo Calabrese	CT	GG	NA	GT	CC	GG	GG	CC	AA	GG	TT	CC	GG	AA	CC	GG	TT	GG	GG	CC	AA	TT	del--del--	GA	TC	CT	CG	TC	AA	NA	GG	TA	GG	GA	CC	TC	GG	AA	AA
71	Apulo Calabrese	CC	GG	GG	GT	CC	GA	GG	CC	AA	GA	TT	CC	GG	AA	CC	GA	TT	GG	GG	CC	AA	TT	del--del--	AA	CC	CC	CC	TC	AA	NA	GG	TA	GG	GA	CC	TT	GG	AA	AA
72	Apulo Calabrese	CT	AA	GG	GG	CC	AA	GG	CC	AA	GA	TT	CC	GG	AA	CC	GA	CT	GG	GG	CC	AA	TT	insCCdel--	GA	CC	CT	CG	TC	AA	NA	GG	TA	GG	GG	CC	NA	GG	AA	NA
73	Apulo Calabrese	CT	GG	GG	GT	CC	GG	GG	CC	AA	GA	TT	CC	GG	AA	CC	GG	TT	GG	GG	CC	AA	TT	del--del--	AA	CC	CT	GG	TC	AA	CC	GG	TA	GG	GG	CC	TT	GG	AA	AA
74	Apulo Calabrese	CT	AA	GG	TT	CC	GA	GG	CT	AA	GA	TT	CC	GG	AA	CC	AA	CC	GG	GG	CC	AA	TT	del--del--	GA	CC	CT	CC	TT	AC	AA	GG	AA	GG	GA	CC	TC	GG	AA	AA
75	Apulo Calabrese	CT	GA	GG	GT	CC	GG	GG	TT	AA	GA	TT	CC	GG	AA	CC	AA	CT	GG	GG	CC	AA	TT	del--del--	NA	CC	CC	CC	TT	AC	NA	GG	AA	GG	GG	CC	TT	GG	AA	AA
76	Apulo Calabrese	CT	AA	GG	TT	CC	GG	GG	CT	AA	NA	TT	CC	GG	AA	CC	GA	CC	GG	GG	NA	AA	TT	del--del--	GA	CC	CT	CC	TT	AC	NA	GG	TA	NA	GA	CC	TT	GG	AA	AA
77	Apulo Calabrese	CT	GA	GG	GT	CC	GG	GG	CT	AA	GA	TT	CC	GG	AA	CC	AA	CC	GG	GG	CC	AA	TT	del--del--	GA	CC	CC	CC	TC	AA	NA	GG	AA	GG	GG	CC	TC	GG	AA	AA
78	Apulo Calabrese	CC	GG	GG	GT	CC	GG	GG	CC	AA	NA	TT	CC	GG	AA	CC	NA	CT	GG	GG	CC	AA	TT	del--del--	GA	CC	CC	CC	TT	AC	NA	GG	AA	GG	GA	CC	TC	GG	AA	AA
79	Apulo Calabrese	NA	NA	NA	NA	CC	GG	GG	CT	AA	NA	TT	NA	GG	AA	NA	GG	NA	GG	NA	NA	AA	NA	del--del--	GG	NA	CT	CC	TT	AA	AA	GG	TA	NA	NA	CC	TC	GG	AA	AA
80	Apulo Calabrese	CC	GG	GG	TT	CC	GG	GG	CT	AA	NA	TT	CC	GG	AA	CC	GA	CT	GG	GG	CC	AA	TT	del--del--	GA	CC	CT	CC	TT	AA	AA	GG	TT	GG	GG	CC	TT	GG	AA	AA
81	Apulo Calabrese	CT	GA	NA	TT	CC	GG	GG	CT	AA	GG	TT	CC	GG	AA	CC	GA	CT	GG	GG	CC	AA	TT	del--del--	AA	CC	CT	CC	TT	AA	AA	GG	TA	GG	GA	CC	TT	GG	AA	AA
82	Apulo Calabrese	CC	AA	GG	GG	CC	GG	GG	CT	AA	GA	TT	CC	GG	AA	CC	AA	CC	GG	GG	CC	AA	TT	del--del--	GA	TC	CT	CC	TC	AA	AA	GG	TT	GG	GG	CC	TT	GG	AA	AA
83	Apulo Calabrese	CC	AA	GG	TT	CC	GA	GG	CT	AA	GA	TT	CC	GG	NA	CC	AA	CC	GG	GG	CC	AA	TT	del--del--	AA	CC	CT	CC	TT	AC	AA	GG	TA	GG	GA	CC	TC	GG	AA	AA
84	Apulo Calabrese	NA	NA	NA	NA	CC	GG	GG	CT	AA	NA	TT	NA	GG	AA	NA	GA	NA	GG	NA	NA	AA	NA	del--del--	AA	NA	CC	CC	NA	AA	AA	NA	TA	NA	NA	CC	TC	GG	AA	NA
85	Apulo Calabrese	CT	GG	GG	GG	CC	GG	GG	CC	AA	GA	TT	CC	GG	AA	CC	GA	NA	GG	GG	CC	AA	TT	del--del--	GA	TC	CC	CC	TC	AC	AA	GG	TT	GG	GG	CC	CC	GG	AA	AA
86	Apulo Calabrese	CC	GG	GG	TT	AC	GA	GT	CC	AA	NA	AT	TC	GG	AA	CT	GA	CC	GG	GG	CC	AA	TT	insCCdel--	GA	CC	CT	CC	TT	CC	AA	GG	TA	GG	AA	TC	TT	GG	AA	AA
87	Apulo Calabrese	CC	GG	GG	GT	AC	GA	GG	CC	AA	AA	AT	CC	GG	AG	CC	GG	CT	GG	GG	CC	AA	TT	del--del--	GA	TT	TT	CC	TC	AA	NA	NA	TT	GG	GA	CC	TT	TG	AA	AA
88	Apulo Calabrese	CT	GG	GG	TT	CC	GA	GG	CT	AA	GA	TT	CC	GG	GG	CC	GG	CC	GG	GG	CC	AA	TT	insCCdel--	GA	TC	TT	CC	TT	AA	AA	GG	TA	GG	GG	CC	TT	TG	AA	AA
89	Apulo Calabrese	NA	NA	NA	NA	AC	GA	GG	TT	AA	NA	TT	NA	GT	GG	NA	GA	NA	GG	NA	NA	AA	NA	del--del--	GG	NA	TT	CC	NA	AA	CC	GG	TA	NA	NA	CC	TC	GG	AA	AA
90	Apulo Calabrese	CT	GA	GG	GT	AC	GG	GG	CC	AA	AA	TT	TC	GG	AA	CC	GG	CT	GG	GG	CC	AA	TT	insCCdel--	AA	CC	TT	CC	TT	AC	NA	GG	TA	GG	AA	CC	TC	TG	AA	AA
91	Apulo Calabrese	CC	GG	GG	GG	AA	GA	GG	CC	AA	GA	AT	CC	GG	AG	CC	GG	CC	GG	GG	CC	AA	TT	insCCdel--	GA	TT	TT	CG	CC	AA	CC	GG	TA	GG	GA	CC	TT	GG	AA	AA
92	Apulo Calabrese	TT	GG	NA	TT	CC	AA	GG	CC	AA	GG	TT	CC	GG	GG	CC	GA	CC	GG	GG	CC	AA	TT	insCCdel--	GA	TT	CT	CC	TT	NA	AA	GG	TT	GG	AA	CC	TC	GG	AA	AA
93	Apulo Calabrese	TT	GG	GG	GT	CC	GA	GG	CT	AA	GA	AA	CC	GT	AG	CC	GA	CC	GG	GG	CC	AA	TT	insCCdel--	GG	TC	TT	CC	TT	NA	CC	GG	TT	GG	GA	CC	TT	GG	AA	AA
94	Apulo Calabrese	NA	NA	NA	NA	AC	GG	GG	CC	AA	NA	TT	NA	GT	NA	NA	GG	NA	GG	NA	NA	AA	NA	NA	GA	NA	TT	CG	TC	AA	CC	NA	TT	NA	NA	CC	CC	GG	AA	NA
95	Apulo Calabrese	CT	GG	GG	GT	AC	GA	GG	CC	AA	NA	AT	CC	GT	NA	CC	GA	CC	GG	GG	CC	AA	TT	del--del--	GG	TT	TT	CC	TT	AA	CC	GG	TA	GG	GA	CC	TT	TG	AA	AA
96	Basque	CT	GG	GG	GT	CC	AA	GG	CC	AA	GA	AA	CC	GG	GG	CC	AA	CC	GG	GG	CC	AA	TT	del--del--	GG	CC	TT	CC	TT	AA	CC	GG	TA	GG	GA	CC	TT	GG	AA	AA
97	Basque	CT	GG	GG	GT	AC	AA	GG	CC	AA	AA	AA	CC	GG	GG	CC	AA	CC	GG	GG	CC	AA	TT	del--del--	GG	TC	TT	CC	TT	AA	CC	GG	TT	GG	GG	CC	TT	GG	AA	AA
98	Basque	CC	GG	GG	GT	AC	AA	GG	CC	AA	GA	TT	CC	GG	GG	CC	AA	CC	GG	GG	CC	AA	TT	del--del--	GG	TT	TT	CC	TT	CC	CC	GG	TT	GG	GG	CC	TT	GG	AA	AA
99	Basque	CT	GG	GG	TT	CC	AA	TT	CC	AA	AA	AA	CC	GG	GG	CC	AA	CC	GG	GG	CC	AA	TT	del--del--	GG	TC	TT	CC	TT	CC	CC	GG	TA	GG	GA	CC	TT	GG	AA	AA
100	Basque	CC	GG	GG	TT	CC	GA	GT	CC	AA	GA	AA	CC	GG	GG	CC	GG	CC	GG	GG	CC	AA	NA	del--del--	GG	CC	TT	CC	TT	CC	CC	GG	TA	GG	GA	CC	TT	GG	AA	AA
101	Basque	TT	GG	GG	TT	AC	AA	GG	CC	AA	AA	AA	CC	GG	GG	CC	AA	CC	GG	GG	CC	AA	TT	del--del--	GG	TC	TT	CC	TT	AC	CC	GG	TT	GG	GG	CC	TT	GG	AA	AA
102	Basque	CT	GG	GG	GT	CC	NA	GG	CC	AA	GA	AT	CC	GG	GG	CC	GG	CC	GG	GG	CC	AA	TT	del--del--	GG	TT	TT	CC	TT	CC	CC	GG	TT	GG	GG	CC	TT	GG	AA	AA
103	Basque	CT	GG	GG	GT	CC	NA	GT	CC	AA	AA	AT	CC	GG	GG	CT	GA	CC	GG	GG	CC	AA	TT	del--del--	GG	TC	TT	CC	TT	CC	CC	GG	TA	GG	GG	CC	TC	GG	AA	AA
104	Basque	CC	GG	GG	TT	CC	NA	GG	CC	AA	GA	AA	CC	GG	GG	CT	AA	CC	GG	GG	CC	AA	TT	del--del--	GG	CC	CT	CC	TT	AA	CC	GG	AA	GG	GG	CC	TT	GG	AA	AA
105	Basque	CC	GG	GG	GT	CC	AA	GG	CC	AA	GA	AA	CC	GG	GG	CC	AA	CC	GG	GG	CC	AA	TT	del--del--	GG	TC	TT	CC	TT	AC	CC	GG	AA	GG	GG	CC	TT	GG	AA	AA
106	Basque	CC	GG	GG	TT	CC	NA	GG	CC	AA	GA	AA	CC	GG	GG	CC	AA	CC	GG	GG	CC	AA	TT	del--del--	GG	TT	TT	CC	TT	AC	CC	GG	TA	GG	GA	CC	TT	GG	AA	AA
107	Basque	CC	GG	GG	TT	AC	GG	GG	CC	AA	GA	AA	CC	GG	GG	CT	GA	CC	GG	GG	CC	AA	TT	del--del--	GG	TC	TT	CC	TT	AC	CC	GG	TA	GG	GG	CC	TT	GG	AA	AA
108	Basque	CC	GG	GG	TT	CC	GA	GG	CC	AA	AA	AA	CC	GG	GG	CC	GA	CC	GG	GG	CC	AA	TT	del--del--	GG	TC	TT	CC	TT	AC	CC	GG	TT	GG	GG	CC	TT	GG	AA	AA
109	Basque	CC	GG	GG	TT	CC	AA	GG	CC	AA	GA	AA	CC	GG	GG	CC	AA	CC	GG	GG	CC	AA	TT	del--del--	GG	TC	TT	CC	TT	AC	CC	GG	TT	GG	GG	CC	TT	GG	AA	AA
110	Basque	CC	GG	NA	GT	CC	AA	GG	CC	AA	GG	AA	CC	GG	GG	CC	AA	CC	GG	GG	CC	AA	TT	del--del--	GG	TC	TT	CC	TT	AA	CC	GG	TA	GG	GA	CC	TT	GG	AA	AA
111	Basque	CT	GG	GG	GG	CC	NA	GG	CC	AA	AA	AT	CC	GG	GG	CC	AA	CC	GG	GG	CC	AA	TT	insCCdel--	GG	CC	TT	CC	TT	AC	CC	GG	TA	GG	GG	CC	TT	GG	AA	AA
112	Basque	CC	GG	GG	GT	CC	AA	GG	CC	AA	GA	AA	CC	GG	GG	CC	GA	CC	GG	GG	CC	AA	TT	del--del--	GG	TC	TT	CC	TT	AA	CC	GG	TA	GG	GA	CC	TT	GG	AA	AA
113	Basque	CT	GG	GG	GT	CC	GG	GG	CC	AA	AA	AA	CC	GG	GG	CT	AA	CC	GG	GG	CC	AA	TT	del--del--	GG	TC	TT	CC	TT	AC	CC	GG	TT	GG	GA	CC	TT	GG	AA	AA
114	Basque	CT	GG	GG	TT	CC	NA	GG	CC	AA	AA	AT	CC	GG	GG	CC	AA	CC	GG	GG	CC	AA	TT	del--del--	GG	TT	TT	CC	TT	AC	CC	GG	TT	GG	GG	CC	TT	GG	AA	AA
115	Basque	CC	GG	GG	TT	CC	AA	GG	CC	AA	AA	AA	CC	GG	GG	CC	AA	CC	GG	GG	CC	AA	TT	del--del--	GG	TC	TT	CC	TT	AC	CC	GG	TA	GG	GG	CC	TT	GG	AA	AA
116	Basque	CT	GG	GG	GG	CC	GA	GG	CC	AA	GA	AA	CC	GG	GG	CC	GA	CC	GG	GG	CC	AA	TT	del--del--	GG	TT	TT	CC	TT	AC	CC	GG	TT	GG	GA	CC	TT	GG	AA	AA
117	Basque	CT	GG	GG	TT	AC	GA	GT	CC	AA	GA	AA	CC	GG	GG	CC	GA	CC	GG	GG	CC	AA	TT	del--del--	GG	TC	TT	CC	TT	CC	CC	GG	TA	GG	GG	CC	TT	GG	AA	NA
118	Basque	CT	GG	GG	TT	CC	AA	GG	CC	AA	GA	AA	CC	GG	GG	CC	AA	CC	GG	GG	CC	AA	TT	del--del--	GG	CC	TT	CG	TT	AA	CC	GG	TT	GG	GG	CC	TT	GG	AA	AA
119	Basque	CT	GG	GG	GT	CC	GG	GG	CC	AA	GA	AA	CC	GG	GG	CC	GA	CC	GG	GG	CC	AA	TT	del--del--	GG	TC	TT	CC	TT	AC	CC	GG	TT	GG	GG	CC	TT	GG	AA	AA
120	Basque	NA	NA	NA	NA	CC	NA	GG	CC	AA	NA	NA	NA	NA	NA	NA	NA	NA	NA	NA	NA	NA	NA	NA	NA	NA	NA	NA	TT	NA	NA	NA	NA	NA	NA	CC	NA	NA	NA	NA
121	Basque	CT	GA	GG	GT	CC	AA	GG	CC	AA	NA	AA	CC	GG	GG	CC	GA	CC	GG	GG	CC	AA	TT	del--del--	GG	TC	TT	CG	TT	AA	CC	GG	TA	GG	AA	CC	TT	GG	AA	AA
122	Basque	CT	GG	GG	TT	CC	NA	GT	CC	AA	GA	AA	CC	GG	GG	CC	GA	CC	GG	GG	CC	AA	TT	del--del--	GG	CC	TT	CC	TT	AA	CC	GG	TT	GG	GA	CC	TT	GG	AA	AA
123	Basque	CC	GG	GG	TT	CC	GA	GG	CC	AA	GA	AT	CC	GG	GG	CT	GA	CC	GG	GG	CC	AA	TT	del--del--	GG	CC	TT	CC	TT	AA	CC	GG	AA	GG	GG	CC	TT	GG	AA	AA
124	Basque	CC	GG	GG	GG	AC	NA	GT	CC	AA	GA	AA	CC	GG	GG	CC	GA	CC	GG	GG	CC	AA	TT	del--del--	GG	TC	TT	CC	TT	AC	CC	GG	TT	GG	GA	CC	TT	GG	AA	AA
125	Basque	CT	GG	GG	TT	CC	GG	GG	CC	AA	AA	AA	CC	GG	GG	CT	GA	CC	GG	GG	CC	AA	TT	del--del--	GG	TC	TT	CG	TT	AC	CC	GG	TA	GG	GA	CC	TT	GG	AA	AA
126	Basque	CC	GG	GG	GT	CC	GG	GG	CC	AA	AA	AA	CC	GG	GG	CC	AA	CC	GG	GG	CC	AA	TT	del--del--	GG	CC	TT	CC	TT	AA	CC	GG	TA	GG	GA	CC	TT	GG	AA	AA
127	Basque	CC	GG	GG	GT	CC	AA	GG	CC	AA	GA	AA	CC	GG	GG	CC	AA	CC	GG	GG	CC	AA	TT	del--del--	GG	TT	TT	CC	TT	AC	CC	GG	TA	GG	GA	CC	TT	GG	AA	AA
128	Basque	CC	GG	GG	GT	CC	GA	GT	CC	AA	GA	AT	CC	NA	NA	CC	GA	CC	GG	GG	CC	AA	TT	del--del--	GG	CC	CT	CC	TT	AC	CC	GG	TT	GG	GG	CC	TT	GG	AA	AA
129	Basque	CC	GG	GA	NA	CC	AA	GG	CC	AA	NA	AA	CC	GG	GG	CC	AA	CC	GG	GG	CC	AA	TT	del--del--	GG	CC	TT	CC	TT	CC	CC	GG	TT	GG	GA	CC	TT	GG	AA	AA
130	Basque	CC	GG	GG	TT	CC	GG	GT	CC	AA	GA	AA	CC	GG	GG	CC	GA	CC	GG	GG	CC	AA	TT	del--del--	GG	TC	TT	CC	TT	AC	CC	GG	TT	GG	GA	CC	TT	GG	AA	AA
131	Basque	CC	GG	GG	TT	AA	NA	GG	CC	AA	AA	AT	CC	GG	GG	CC	GA	CC	GG	GG	CC	AA	TT	del--del--	GG	TC	TT	CG	TT	AA	CC	GG	TA	GG	GA	CC	TT	GG	AA	AA
132	Basque	CC	GG	GG	TT	AC	AA	GG	CC	AA	GA	AA	CC	GG	GG	CT	AA	CC	GG	GG	CC	AA	TT	del--del--	GG	TC	TT	CC	TT	AC	CC	GG	TA	GG	GG	CC	TT	GG	AA	AA
133	Basque	CC	GG	GG	GT	CC	NA	GG	CC	AA	GA	AT	TC	GG	GG	CT	AA	CC	GG	GG	CC	AA	TT	del--del--	GG	TC	TT	CG	TT	CC	CC	GG	TA	GG	GA	CC	TT	GG	AA	AA
134	Basque	CC	GG	GA	GT	AC	GA	GG	CC	AA	AA	AT	CC	GG	GG	CC	GA	CC	GA	GG	CC	GA	TC	del--del--	GG	CC	TT	CC	TT	CC	CC	GG	AA	GG	GA	CC	TT	GG	AA	AA
135	Basque	CT	GG	GG	GT	AC	AA	GG	CC	AA	GA	AA	CC	GG	GG	CT	GA	CC	GG	GG	CC	AA	TT	del--del--	GG	TC	CT	CC	TT	AC	CC	GG	TA	GG	GG	CC	TC	GG	AA	AA
136	Basque	CC	GG	GG	GT	CC	GG	GG	CC	AA	GA	AA	CC	GG	GG	NA	AA	NA	GG	GG	CC	AA	TT	del--del--	GG	TC	CT	CC	TT	AC	CC	GG	TT	GG	GA	CC	TT	GG	AA	AA
137	Basque	CC	GG	GG	GT	CC	GG	GG	CC	AA	NA	AT	CC	GG	GG	CT	GG	CC	GG	GG	CC	AA	TT	del--del--	GG	CC	TT	CC	TT	CC	CC	GG	TT	GG	GA	CC	TC	GG	AA	AA
138	Basque	CC	GG	GG	GG	CC	AA	GG	CC	AA	GA	AT	TT	GG	GG	CC	AA	CC	GG	GG	CC	AA	TT	del--del--	GG	CC	TT	CG	TT	CC	CC	GG	TT	GG	AA	CC	TT	GG	AA	AA
139	Basque	CC	GG	GG	TT	CC	AA	GG	CC	AA	GA	AA	CC	GG	GG	CT	AA	CC	GG	GG	CC	AA	TT	del--del--	GG	CC	TT	CG	TT	AA	CC	GG	TA	GG	GA	CC	TT	GG	AA	AA
140	Basque	CC	GG	GG	GT	CC	AA	GG	CC	AA	AA	AA	TC	GG	GG	CC	GA	CC	GG	GG	CC	AA	TT	del--del--	GG	TC	CC	CC	TT	AC	CC	GG	TT	GG	GA	CC	TT	GG	AA	AA
141	Basque	CC	GG	GG	TT	CC	GA	GG	CC	AA	AA	AA	CC	GG	GG	CC	GA	CC	GG	GG	CC	AA	TT	del--del--	GG	CC	CT	CC	TT	AC	CC	GG	TA	GG	GA	CC	TT	GG	AA	AA
142	Basque	CC	GG	GG	TT	AC	AA	GG	CC	AA	GA	AA	CC	GG	GG	CC	AA	CC	GG	GG	CC	AA	TT	del--del--	GG	TC	TT	CG	TT	CC	CC	GG	TA	GG	GG	CC	TT	GG	AA	AA
143	Basque	CC	GG	GG	GT	CC	GG	GG	CC	AA	GA	TT	CC	GG	GG	CC	AA	CC	GG	GG	CC	AA	TT	del--del--	GG	CC	TT	CC	TT	AC	CC	GG	TT	GG	GG	CC	TT	GG	AA	AA
144	Bisara	CC	GG	GG	GG	AC	NA	GT	CC	AA	GA	TT	TT	GG	GG	CC	GG	CT	GG	GG	CC	AA	TT	del--del--	GG	TT	CT	GG	TT	AC	CC	GG	TA	GG	AA	TC	CC	GG	AA	AA
145	Bisara	CT	GG	GG	TT	CC	NA	GT	CC	AA	GA	AT	TT	TT	GG	CC	GG	CC	GG	GG	CC	AA	TT	del--del--	GG	TT	TT	CG	TT	AA	CC	GG	AA	GG	GA	CC	TT	GG	AA	AA
146	Bisara	CT	GG	GG	TT	CC	GG	GT	TT	AA	GA	TT	TC	TT	GG	CC	GG	CC	GG	GG	CC	AA	TT	del--del--	GG	TT	TT	CG	TT	AC	CC	GA	AA	GG	GA	CC	TT	TG	AA	AA
147	Bisara	CT	GA	GG	GT	AC	GA	GG	CT	AA	GA	TT	TC	GG	GG	CC	GG	CC	GG	GG	CC	AA	TT	del--del--	GG	TC	TT	CC	TT	AC	CA	GG	AA	GG	GG	CC	TC	TG	AA	AA
148	Bisara	TT	GA	GG	TT	AA	NA	GG	TT	AA	NA	AT	TC	GG	GG	CC	GA	CC	GG	GG	CC	AA	TT	del--del--	GG	TT	TT	CG	TT	AC	CC	GG	TA	GG	AA	TC	TT	GG	AA	AA
149	Bisara	TT	GG	GA	TT	AA	AA	GT	CC	AA	GA	AT	CC	GT	AG	CC	GG	CT	GG	GG	CC	AA	TT	del--del--	GG	TC	TT	CC	TT	AA	CC	GG	AA	GG	GA	CC	TC	GG	AA	AA
150	Bisara	TT	GA	GA	TT	CC	GG	GG	CC	AA	AA	AT	TC	GG	GG	CC	GG	CC	GG	GG	CC	AA	TT	insCCdel--	GA	TC	TT	CG	TT	AC	CC	GG	TA	GG	GA	CC	TC	TG	AA	AA
151	Bisara	TT	GG	GA	TT	AC	GG	GG	CC	AA	GA	AT	TC	GG	GG	CC	GG	CC	GG	GG	CC	AA	TT	insCCdel--	GA	TC	TT	CG	TT	AC	CC	GG	TA	GG	GA	CC	TC	TG	AA	AA
152	Bisara	TT	GA	GG	TT	CC	AA	GG	CT	AA	GA	AA	TC	GG	GG	CC	GG	CC	GG	GG	CC	AA	TT	del--del--	GA	TC	TT	CG	TT	AC	CC	GG	AA	GG	AA	CC	TT	TG	AA	AA
153	Bisara	CC	GG	AA	GT	AA	NA	GT	CT	AA	GA	AA	CC	GG	GG	CC	GG	CC	GG	GG	CC	AA	TT	del--del--	GG	TC	TT	CG	TT	AC	CC	GG	TT	GG	AA	CC	CC	GG	AA	AA
154	Bisara	CT	GG	GG	TT	AC	GG	TT	TT	AA	GA	AA	TT	GG	GG	CC	GG	CT	GG	GG	CC	AA	TT	del--del--	GG	TC	TT	GG	TT	CC	CC	GG	TA	GG	GA	CC	TC	GG	AA	AA
155	Bisara	CC	GG	GG	TT	AA	GG	GG	CT	AA	GG	TT	TC	GT	GG	CC	GG	CC	GG	GG	CC	AA	TT	insCCdel--	GG	TC	CT	CG	TT	AA	CC	AA	AA	GG	GA	CC	TC	TG	AA	AA
156	Bisara	CT	GG	GG	TT	CC	NA	GT	CC	AA	NA	AT	TC	GT	GG	CC	AA	CC	GG	GG	CC	AA	TT	insCCdel--	GG	TT	NA	CC	TT	CC	CC	GA	AA	GG	AA	CC	TC	GG	AA	AA
157	Bisara	CC	GG	GG	GG	AC	GG	GT	CT	AA	AA	AT	CC	GG	GG	CC	GG	CT	GG	GG	CC	AA	TT	insCCdel--	GG	TT	CT	CG	TT	AA	CC	GG	AA	GG	GA	CC	TT	TG	AA	AA
158	Bisara	CC	GA	GG	GG	AC	GG	GG	CC	AA	GA	AA	TC	GG	GG	CC	GG	CC	GG	GG	CC	AA	TT	insCCdel--	GG	TT	CC	GG	TT	AA	NA	GA	AA	GG	AA	CC	TT	GG	AA	AA
159	Bisara	CT	GG	GG	TT	CC	AA	GG	CT	AA	GA	AT	CC	GG	GG	CC	GG	CT	GG	GG	CC	AA	TT	insCCdel--	GG	TC	CT	CG	TT	AC	CC	GG	AA	GG	GG	CC	TT	GG	AA	AA
160	Bisara	CT	GA	GG	TT	AC	GG	GG	CT	AA	GA	AT	CC	GT	GG	CC	GG	CT	GG	GG	CC	AA	TT	insCCdel--	GG	TC	CC	CC	TT	CC	CC	GA	AA	GG	GA	CC	TT	TG	AA	AA
161	Bisara	CT	GG	GG	GT	AC	GG	GG	CT	AA	GA	TT	TC	GG	GG	CC	GG	CT	GG	GG	CC	AA	TT	del--del--	GG	TT	TT	GG	TT	AC	CC	GG	TT	GG	GA	CC	TC	GG	AA	AA
162	Bisara	TT	GG	GA	TT	CC	GA	GG	CT	AA	NA	TT	CC	GG	GG	CC	GA	CC	GG	GG	CC	AA	TT	del--del--	GG	TT	TT	CC	TT	CC	NA	GA	AA	GG	GA	CC	CC	GG	AA	AA
163	Bisara	CT	GG	AA	TT	CC	GA	GG	CT	AA	GA	TT	TC	GG	GG	CC	GG	CC	GG	GG	CC	AA	TT	del--del--	GG	TT	TT	CG	TT	CC	CC	GA	TA	GG	AA	CC	TC	GG	AA	AA
164	Bisara	CT	GG	GG	TT	AC	NA	GT	CC	AA	NA	TT	CC	GT	GG	CC	GG	CC	GG	GG	CC	AA	TT	insCCdel--	GG	TT	CT	CC	TT	AA	CC	GG	AA	GG	GA	CC	TT	GG	AA	AA
165	Bisara	CT	GA	GG	TT	AA	GA	GT	TT	AA	GG	TT	TC	GG	GG	CC	GG	CC	GG	GG	CC	AA	TT	del--del--	GG	TT	CT	GG	TT	AC	NA	GG	AA	GG	GG	TC	TT	TG	AA	AA
166	Bisara	TT	GA	GG	GT	CC	NA	GG	CT	AA	GA	TT	CC	GT	GG	CC	GG	CC	GG	GA	CT	GA	TT	del--del--	GG	TT	TT	CG	TT	AC	AA	GA	TA	GG	GA	CC	TC	GG	AA	AA
167	Bisara	CC	AA	GG	TT	CC	GA	GG	CT	AA	AA	AA	TT	GT	GG	CC	GG	CC	GG	GG	CC	AA	TT	del--del--	GG	TT	TT	CG	TT	CC	NA	GG	TT	GG	AA	TC	TT	GG	AA	AA
168	Bisara	CC	GG	GG	TT	AA	NA	GG	CC	AA	AA	AA	CC	GG	GG	CC	GG	CT	GG	GG	CC	AA	TT	del--del--	GA	CC	TT	CC	TT	AC	CC	GA	AA	GG	GA	CC	TT	GG	AA	AA
169	Bisara	CT	GG	GG	GT	AC	GA	GT	CT	AA	NA	AA	CC	GG	GG	CC	GG	CC	GG	GG	CC	AA	TT	insCCdel--	GG	TT	TT	CC	TT	AC	CA	GA	TA	GG	GA	CC	TC	GG	AA	AA
170	Bisara	CT	GG	GG	GG	AA	NA	GG	TT	AA	NA	AA	CC	GG	GG	CC	GG	CT	GG	GG	CC	AA	TT	del--del--	GA	TC	TT	CC	TT	AA	CC	GG	TA	GG	GG	CC	TT	GG	AA	AA
171	Bisara	CC	GG	GG	GT	AC	GG	GG	TT	AA	GA	AA	CC	GG	GG	CC	GG	CT	GG	GG	CC	AA	TT	del--del--	GG	TC	TT	CG	TT	CC	CC	GA	TT	GG	AA	CC	TT	GG	AA	AA
172	Bisara	CC	GG	GG	GT	AA	NA	GG	CT	AA	GA	AA	CC	GG	GG	CC	GG	CT	GG	GG	CC	AA	TT	del--del--	GG	CC	TT	CC	TT	CC	CC	GA	TA	GG	GA	CC	TT	GG	AA	AA
173	Bisara	CC	GG	GG	GT	AA	GG	GG	TT	AA	GA	AT	CC	GG	GG	CC	GG	CC	GG	GG	CC	AA	TT	del--del--	GA	TT	CT	CC	TT	AA	CA	NA	TA	GG	GA	CC	TC	GG	AA	AA
174	Bisara	CT	GG	GG	GG	CC	GG	GT	CC	AA	NA	AT	TC	GG	GG	CC	GA	CC	GG	GG	CC	AA	TT	del--del--	GG	TT	CT	GG	TT	AA	CC	GG	AA	GG	GA	CC	TC	GG	AA	AA
175	Bisara	CT	GG	GG	GG	CC	NA	NA	CC	AA	NA	TT	TC	GG	GG	CC	NA	CT	GG	GG	CC	AA	TT	insCCdel--	GG	TT	CT	CG	TT	AA	CC	GG	TA	GG	GG	CC	TC	GG	AA	AA
176	Bisara	CC	GG	GG	TT	AC	NA	GT	CT	AA	NA	AT	TT	GG	GG	CC	GG	TT	GG	GG	CC	AA	TT	del--del--	GG	TT	TT	CC	TT	AC	CC	GG	TA	GG	GA	CC	TC	GG	AA	AA
177	Bisara	CT	AA	GA	TT	AA	NA	GG	CT	AA	NA	AA	TT	GT	GG	CC	GG	CC	GG	GG	CC	AA	TT	del--del--	GG	TT	TT	CG	TT	AA	NA	GG	TT	GG	AA	CC	TC	GG	AA	AA
178	Bisara	CT	GG	GG	TT	AA	GA	GG	CT	AA	GA	AA	TT	GT	GG	CC	GG	CT	GG	GG	CC	AA	TT	del--del--	GG	TT	TT	CG	TT	AA	CC	GG	TT	GG	GA	CC	TC	GG	AA	AA
179	Bisara	CC	GG	GG	GT	AC	GA	GT	CT	AA	NA	AT	TC	GT	GG	CC	GG	CC	GG	GG	CC	AA	TT	del--del--	GG	TT	TT	CC	TT	CC	CC	GG	TA	GG	AA	CC	TC	GG	AA	AA
180	Bisara	CC	GG	GA	TT	AA	AA	GT	CT	AA	AA	AA	TC	GT	GG	CC	GG	CC	GG	GG	CC	AA	TT	del--del--	GG	TC	TT	CG	TT	AC	CC	GA	TA	GG	AA	CC	TC	GG	AA	AA
181	Bisara	CC	GG	GG	GT	AC	GA	GG	CT	AA	NA	AT	TT	GT	GG	CC	GG	CT	GG	GG	CC	AA	TT	del--del--	GG	TT	TT	CC	TT	AC	CC	GG	TA	GG	AA	CC	TC	GG	AA	AA
182	Bisara	CC	GG	GG	GT	AC	NA	GT	TT	AA	GA	AT	TT	GG	GG	CC	GG	CC	GG	GG	CC	AA	TT	del--del--	GG	TT	TT	CG	TT	AA	NA	GG	TA	GG	AA	CC	TC	GG	AA	AA
183	Bisara	CC	GG	GG	TT	CC	GA	TT	CT	AA	AA	TT	TT	GT	GG	CC	GG	TT	GG	GG	CC	AA	TT	del--del--	GG	TT	TT	CC	TT	CC	CC	GG	TA	GG	GA	CC	TC	TG	AA	AA
184	Bisara	CT	GG	GG	TT	AA	NA	TT	CT	AA	GA	AT	TT	GG	GG	CC	GG	CT	GG	GG	CC	AA	TT	del--del--	GG	TT	TT	CG	TT	AC	CC	GG	TA	GG	AA	CC	TT	TG	AA	AA
185	Bisara	CT	GA	GG	TT	AA	NA	GT	CC	AA	GA	AT	CC	GT	GG	CC	GA	CC	GG	GG	CC	AA	TT	del--del--	GG	TT	TT	CG	TT	CC	CC	GA	TA	GG	GG	CC	TT	GG	AA	AA
186	Bisara	CC	GG	GG	TT	AA	GA	GT	CT	AA	GA	AA	TT	GT	GG	CC	GG	TT	NA	GG	CC	AA	TT	del--del--	GG	TT	TT	CG	TT	AC	CC	GG	TT	GG	GA	CC	TC	GG	AA	AA
187	Bisara	CC	GG	GG	TT	AA	NA	TT	CT	AA	GG	AT	TC	GT	GG	CC	GG	CT	GG	GG	CC	AA	TT	del--del--	GG	TT	TT	CG	TT	CC	NA	GA	TA	GG	GA	CC	TT	GG	AA	AA
188	Bisara	CT	GG	GG	TT	CC	GG	GG	CT	AA	GA	AT	CC	GG	GG	CC	GG	CT	GG	GG	CC	AA	TT	insCCdel--	GG	TC	TT	CC	TT	AA	CC	GG	AA	GG	GA	CC	CC	GG	AA	AA
189	Bisara	CC	GG	GG	GT	AA	NA	GG	CC	AA	GA	TT	CC	GT	GG	CC	GG	CC	GG	GG	CC	AA	TT	del--del--	GG	TT	TT	CC	TT	AC	NA	GG	TA	GG	AA	CC	TC	TG	AA	AA
190	Bisaro	CC	GG	GG	TT	CC	NA	GG	CT	AA	NA	AT	TT	GG	GG	CC	GG	CT	GG	GG	CC	AA	TT	del--del--	GG	TT	TT	CG	TT	CC	CC	GG	AA	GG	GG	CC	TC	GG	AA	AA
191	Bisaro	CT	GG	GG	GT	AC	GG	GG	CC	AA	NA	TT	TT	GG	GG	CC	GG	CT	GG	GG	CC	AA	TT	del--del--	GG	TT	CT	GG	TT	AA	CC	GG	TT	GG	GA	TC	TC	GG	AA	AA
192	Black Slavonian	CC	AA	GA	TT	NA	NA	NA	NA	NA	NA	NA	TT	NA	NA	CC	NA	CT	NA	GG	CC	NA	TC	NA	NA	CC	NA	NA	NA	NA	NA	NA	NA	GG	GG	CC	NA	NA	NA	NA
193	Black Slavonian	CT	AA	GA	GG	NA	NA	NA	NA	NA	GG	NA	TC	NA	NA	CC	NA	CT	NA	NA	CC	NA	CC	NA	NA	TC	NA	NA	NA	NA	NA	NA	NA	GG	GG	CC	NA	NA	NA	NA
194	Black Slavonian	CC	AA	NA	GG	NA	NA	NA	NA	NA	NA	NA	TT	NA	NA	CC	NA	NA	NA	NA	CC	NA	CC	NA	NA	CC	NA	NA	NA	NA	NA	NA	NA	GG	GG	CC	NA	NA	NA	NA
195	Black Slavonian	CC	AA	GG	GT	AA	AA	GG	CC	AA	NA	TT	TC	GG	GG	CC	GG	CC	AA	NA	CC	GG	CC	del--del--	GA	CC	TT	CC	TT	AA	CC	GG	TA	GG	GG	CC	TT	GG	AA	AA
196	Black Slavonian	CC	AA	GA	GG	NA	NA	NA	NA	NA	GA	NA	TT	NA	NA	CC	NA	CC	NA	NA	CC	NA	CC	NA	NA	CC	NA	NA	NA	NA	NA	NA	NA	GG	GA	CC	NA	NA	NA	NA
197	Black Slavonian	CT	AA	GA	TT	AC	GG	GG	CC	AA	NA	AT	TC	GT	GG	CC	GA	CC	AA	NA	CC	GG	CC	del--del--	GG	TC	CT	CC	TC	CC	CC	GG	TT	GG	GG	CC	TT	TG	AA	AA
198	Black Slavonian	CC	AA	GG	TT	AC	GA	GG	CC	AA	GA	TT	CC	GT	GG	CC	GG	CT	AA	NA	CC	GG	CC	del--del--	GG	CC	CT	CC	TT	CC	CC	GG	TA	NA	GG	CC	CC	TG	AA	AA
199	Black Slavonian	CT	AA	GA	GG	CC	GG	GG	CC	AA	NA	TT	NA	NA	GG	CC	GA	NA	GA	GG	CC	GA	NA	insCCdel--	GG	TC	TT	CC	TT	CC	NA	GA	TA	NA	GG	CC	TC	TG	AA	AA
200	Black Slavonian	CT	AA	GA	GG	NA	NA	NA	NA	NA	GA	NA	TC	NA	NA	CC	NA	CT	NA	NA	CC	NA	CC	NA	NA	CC	NA	NA	NA	NA	NA	NA	NA	GG	GG	CC	NA	NA	NA	NA
201	Black Slavonian	NA	NA	NA	NA	NA	NA	NA	NA	NA	NA	NA	NA	NA	NA	NA	NA	NA	NA	NA	NA	NA	NA	NA	NA	NA	NA	NA	NA	NA	NA	NA	NA	NA	NA	NA	NA	NA	NA	NA
202	Black Slavonian	CT	AA	GA	TT	CC	AA	GG	CC	AA	GA	AT	TC	GG	GG	CC	GA	TT	AA	NA	CC	GG	CC	del--del--	GG	CC	CT	CC	TT	AA	CC	GG	TA	GG	GG	CC	TT	GG	AA	AA
203	Black Slavonian	CC	AA	GG	GG	AC	GG	GG	CC	AA	GA	TT	TC	GG	GG	CC	AA	TT	AA	NA	CC	GG	NA	del--del--	GG	TC	CT	CC	TT	AC	CC	GA	TT	GG	GG	CC	CC	GG	AA	AA
204	Black Slavonian	CT	GA	AA	GT	NA	NA	NA	NA	NA	GA	NA	TC	NA	NA	CC	NA	TT	NA	NA	CC	NA	CC	NA	NA	CC	NA	NA	NA	NA	NA	NA	NA	GG	GG	CC	NA	NA	NA	NA
205	Black Slavonian	CC	GA	GA	GT	AC	GA	GG	CC	AA	AA	AT	CC	GG	GG	CC	GA	TT	AA	NA	CC	GG	CC	del--del--	GG	CC	CT	CC	TT	AC	CC	GG	TA	GG	GG	CC	TC	TG	AA	AA
206	Black Slavonian	CC	GA	NA	TT	AC	NA	GG	CC	AA	NA	AT	CC	GG	GG	CC	GA	TT	AA	NA	CC	GG	CC	del--del--	GG	CC	TT	CC	TT	AC	CC	GG	TA	GG	GG	CC	TT	GG	AA	AA
207	Black Slavonian	CC	AA	GG	TT	AC	GA	GG	CC	AA	NA	AT	CC	GG	AG	CC	GG	CT	GA	GG	CC	GA	NA	insCCdel--	GG	TC	CT	CG	TT	AC	CC	GG	AA	GG	GG	CC	TC	GG	AA	AA
208	Black Slavonian	CT	NA	NA	GG	CC	GG	GG	CC	AA	AA	TT	CC	GG	GG	CC	GA	NA	AA	NA	CC	GG	CC	del--del--	GG	CC	CC	CG	TT	CC	CC	GA	TA	GG	GG	CC	TT	GG	AA	AA
209	Black Slavonian	CC	AA	GA	GT	NA	NA	NA	NA	NA	NA	NA	TC	NA	NA	CC	NA	TT	NA	NA	CC	NA	CC	NA	NA	CC	NA	NA	NA	NA	NA	NA	NA	GG	GG	CC	NA	NA	NA	NA
210	Black Slavonian	CC	AA	GA	GT	CC	GA	GG	CC	AA	NA	TT	TC	GG	GG	CC	GA	CT	AA	NA	CC	GG	CC	del--del--	GG	TC	CT	CC	TT	AC	CC	GG	TA	GG	GA	CC	TC	TG	AA	AA
211	Black Slavonian	TT	AA	NA	GG	NA	NA	NA	NA	NA	NA	NA	CC	NA	NA	CC	NA	CT	NA	GG	CC	NA	TT	NA	NA	TC	NA	NA	NA	NA	NA	NA	NA	GG	GA	CC	NA	NA	NA	NA
212	Black Slavonian	CC	GA	GG	GG	AC	GA	GT	CC	AA	NA	TT	CC	GG	AG	CC	GA	CT	GG	GG	CC	AA	TT	insCCdel--	GG	TC	CT	CC	TT	AC	CC	GA	TT	GG	GA	CC	TC	GG	AA	AA
213	Black Slavonian	CC	AA	GG	GG	NA	NA	NA	NA	NA	GA	NA	CC	NA	NA	CC	NA	CT	NA	NA	CC	NA	CC	NA	NA	CC	NA	NA	NA	NA	NA	NA	NA	GG	GG	CC	NA	NA	NA	NA
214	Black Slavonian	CT	GA	GA	GG	AC	GA	GG	CC	AA	GA	TT	CC	GG	AG	CC	GA	CT	AA	NA	CC	GG	CC	del--del--	GG	TC	CC	CG	TT	AC	CC	GG	TT	GG	GA	CC	TC	TG	AA	AA
215	Black Slavonian	CT	AA	NA	TT	NA	NA	NA	NA	NA	NA	NA	TC	NA	NA	CT	NA	CC	NA	NA	CC	NA	CC	NA	NA	CC	NA	NA	NA	NA	NA	NA	NA	GG	GA	CC	NA	NA	NA	NA
216	Black Slavonian	CT	AA	NA	GG	NA	NA	NA	NA	NA	NA	NA	TT	NA	NA	CC	NA	CC	NA	AA	CT	NA	TC	NA	NA	CC	NA	NA	NA	NA	NA	NA	NA	GG	GG	CC	NA	NA	NA	NA
217	Black Slavonian	TT	AA	NA	GT	AC	GA	GT	CC	AA	NA	AT	TC	GG	GG	CC	GA	CT	AA	NA	CC	GG	CC	del--del--	GG	CC	CC	CG	TT	AC	CC	GG	TT	GG	AA	CC	CC	GG	AA	AA
218	Black Slavonian	CC	AA	AA	GT	AA	GA	GG	CC	AA	NA	TT	TC	GG	NA	CC	GG	CC	AA	NA	CC	GG	NA	del--del--	GG	CC	CT	CG	TT	AA	CC	GG	TT	GG	GA	CC	TC	GG	AA	AA
219	Black Slavonian	NA	NA	NA	NA	AA	GA	GG	CC	AA	NA	TT	NA	GG	GG	NA	GG	NA	AA	NA	NA	GG	NA	del--del--	GG	NA	CC	CG	TT	AA	CC	GG	TT	NA	NA	CC	TC	GG	AA	AA
220	Black Slavonian	CT	AA	NA	GT	NA	NA	NA	NA	NA	GA	NA	TC	NA	NA	CC	NA	CC	NA	NA	CC	NA	CC	NA	NA	CC	NA	NA	NA	NA	NA	NA	NA	GG	GA	CC	NA	NA	NA	NA
221	Black Slavonian	NA	NA	NA	NA	AC	GA	GG	CC	AA	NA	AT	NA	GG	GG	NA	GA	NA	AA	NA	NA	GG	NA	del--del--	GG	NA	CC	CG	TT	AC	CC	GG	TA	NA	NA	CC	TC	TG	AA	AA
222	Black Slavonian	CT	AA	AA	GG	AA	AA	GT	CT	AA	NA	TT	TC	GG	GG	CC	GA	CC	AA	NA	CC	GG	CC	del--del--	GG	CC	CT	CC	TT	AA	CC	GG	TT	GG	AA	CC	CC	GG	AA	AA
223	Black Slavonian	CT	AA	AA	GT	CC	AA	GG	CT	AA	GA	TT	TT	GG	GG	CC	GA	CC	AA	NA	CC	GG	CC	del--del--	GG	CC	TT	CC	TT	AA	NA	GG	TT	GG	AA	CC	CC	GG	AA	AA
224	Black Slavonian	CT	AA	AA	GG	NA	NA	NA	NA	NA	GA	NA	CC	NA	NA	CC	NA	CC	NA	NA	CC	NA	CC	NA	NA	CC	NA	NA	NA	NA	NA	NA	NA	GG	GA	CC	NA	NA	NA	NA
225	Black Slavonian	TT	AA	GA	GT	NA	NA	NA	NA	NA	GA	NA	TT	NA	NA	CC	NA	CC	NA	NA	CC	NA	CC	NA	NA	CC	NA	NA	NA	NA	NA	NA	NA	GG	AA	CC	NA	NA	NA	NA
226	Black Slavonian	NA	AA	GA	GT	CC	GA	GG	CT	AA	NA	AT	TT	GT	GG	CC	GA	CC	AA	NA	CC	GG	CC	del--del--	GG	CC	TT	CC	TT	AC	CC	GG	TA	GG	AA	CC	CC	GG	AA	AA
227	Black Slavonian	CT	GA	GG	TT	NA	NA	NA	NA	NA	NA	NA	TT	NA	NA	CC	NA	NA	NA	NA	NA	NA	CC	NA	NA	CC	NA	NA	NA	NA	NA	NA	NA	GG	GG	CC	NA	NA	NA	NA
228	Black Slavonian	CC	AA	GG	TT	AA	GA	GG	CT	AA	GA	AT	CC	GG	GG	CC	GA	CT	AA	NA	CC	GG	CC	del--del--	GA	CC	TT	CC	NA	AC	NA	GG	TA	GG	GA	CC	TC	TT	AA	AA
229	Black Slavonian	CC	GA	GG	TT	NA	NA	NA	NA	NA	GA	NA	TC	NA	NA	CC	NA	CT	NA	NA	CC	NA	CC	NA	NA	CC	NA	NA	NA	NA	NA	NA	NA	GG	GG	CC	NA	NA	NA	NA
230	Black Slavonian	NA	NA	NA	NA	AC	GA	GG	CC	AA	NA	TT	NA	GT	GG	NA	GG	NA	GA	NA	NA	GA	NA	del--del--	GG	NA	TT	CG	TC	AC	CC	GG	TA	NA	NA	CC	TT	GG	AA	AA
231	Black Slavonian	CC	AA	GG	GT	NA	NA	NA	NA	NA	NA	NA	TC	NA	NA	CC	NA	NA	NA	GG	CC	NA	TC	NA	NA	CC	NA	NA	NA	NA	NA	NA	NA	GG	GG	CC	NA	NA	NA	NA
232	Black Slavonian	TT	GA	NA	GT	NA	NA	NA	NA	NA	GG	NA	TC	NA	NA	CC	NA	CC	NA	NA	NA	NA	CC	NA	NA	CC	NA	NA	NA	NA	NA	NA	NA	GG	GG	CC	NA	NA	NA	NA
233	Black Slavonian	NA	NA	NA	NA	NA	NA	NA	NA	NA	NA	NA	NA	NA	NA	NA	NA	NA	NA	NA	NA	NA	NA	NA	NA	NA	NA	NA	NA	NA	NA	NA	NA	NA	NA	NA	NA	NA	NA	NA
234	Black Slavonian	CT	AA	GA	TT	AC	GG	GG	CT	AA	GG	AT	TC	GG	AG	CC	AA	CT	AA	NA	CC	GG	CC	del--del--	GA	CC	CT	CG	TT	CC	CC	GG	TA	GG	GG	CC	TC	TG	AA	AA
235	Black Slavonian	CC	AA	NA	NA	CC	GA	GG	CC	AA	NA	AT	CC	GG	GG	CC	GG	CT	AA	NA	CC	GG	NA	del--del--	GG	CC	CT	CC	TT	AC	CC	GG	AA	GG	GG	CC	TC	GG	AA	NA
236	Black Slavonian	CC	AA	GA	GT	CC	GG	GG	CT	AA	GA	TT	CC	GT	GG	CC	GG	CC	AA	NA	CC	GG	CC	del--del--	GG	CC	TT	CC	TC	AC	NA	GG	TA	GG	GA	CC	TC	GG	AA	AA
237	Black Slavonian	CC	AA	GA	GT	CC	GG	GG	CT	AA	GA	TT	CC	GT	GG	CC	GA	CC	AA	NA	CC	GG	CC	del--del--	GG	CC	CT	CC	TC	AC	CC	GG	TA	GG	GA	CC	TC	TG	AA	AA
238	Black Slavonian	CC	GA	GA	TT	NA	NA	NA	NA	NA	GA	NA	TC	NA	NA	CC	NA	CT	NA	GG	CC	NA	TC	NA	NA	CC	NA	NA	NA	NA	NA	NA	NA	GG	GA	CC	NA	NA	NA	NA
239	Casertana	CT	GG	GG	GG	AA	GG	GG	TT	AA	NA	AT	TT	GG	GG	CC	GG	CC	GG	GG	CC	AA	TT	del--del--	GG	CC	CC	CG	TT	CC	CC	GG	TT	GG	GA	CC	TT	GG	AA	AA
240	Casertana	CT	GG	GG	GT	AC	GA	GG	TT	AA	NA	AA	TC	GG	GG	CC	GG	CC	GG	GG	CC	AA	TT	del--del--	GG	TT	CT	CG	TT	CC	CC	GG	TT	GG	AA	CC	TT	GG	AA	AA
241	Casertana	CT	AA	GG	GT	AC	GA	GG	CT	AA	NA	AA	TC	GG	GG	CC	GG	NA	GG	GG	CC	AA	TT	del--del--	GG	TT	CT	CG	TT	AC	CC	GG	TT	NA	AA	CC	TC	GG	AA	AA
242	Casertana	TT	GA	GG	GT	AC	GA	GG	CC	AA	NA	AT	TC	GG	GG	CC	GG	CC	GG	GG	CC	AA	TT	del--del--	GG	TT	TT	CG	TT	CC	CC	GG	TT	GG	AA	CC	TT	GG	AA	AG
243	Casertana	CT	GG	GG	GT	AC	GA	GG	CT	AA	NA	AT	TC	GG	GG	CC	GG	CC	GG	GG	CC	AA	TT	del--del--	GG	TC	CT	CC	TT	CC	CC	GG	TT	GG	GA	CC	TT	GG	AA	AA
244	Casertana	CT	GG	GG	GT	AA	GG	GG	CC	AA	GA	AT	CC	GG	GG	CC	GA	CT	GG	GG	CC	AA	TT	del--del--	GA	TT	CT	CC	TT	AC	CC	GG	AA	GG	AA	CC	TT	GG	AA	AA
245	Casertana	CT	AA	GG	TT	AA	GG	GG	CT	AA	GA	TT	CC	GG	GG	CC	GA	CC	GG	GG	CC	AA	TT	del--del--	GA	TT	CT	CG	TT	AC	NA	GG	TA	GG	AA	CC	TT	GG	AA	AA
246	Casertana	CC	GG	GG	GT	AA	GG	GG	CC	AA	GA	TT	CC	GG	GG	CC	GA	CT	GG	GG	CC	AA	TT	del--del--	GG	TT	CT	CC	TT	CC	NA	GG	TT	GG	AA	CC	TC	GG	AA	AA
247	Casertana	CT	GG	NA	GT	AA	GG	GG	CC	AA	NA	TT	CC	GG	GG	CC	AA	CT	GG	GG	CC	AA	TT	del--del--	GA	TT	TT	CC	TT	CC	NA	GG	TA	GG	AA	CC	TC	GG	AA	AA
248	Casertana	CT	GG	GG	GT	AA	GG	GG	CT	AA	GA	AT	CC	GG	GG	CC	AA	CC	GG	GG	CC	AA	TT	del--del--	GG	TT	TT	CC	TT	AC	CC	GG	TA	GG	GA	CC	TC	GG	AA	AA
249	Casertana	CT	GA	GG	GT	AA	GG	GG	CC	AA	NA	AT	CC	GG	GG	CC	AA	CT	GG	GG	CC	AA	TT	del--del--	GA	TT	TT	CC	TT	AC	CC	GG	TA	GG	AA	CC	TC	GG	AA	AA
250	Casertana	TT	GG	GG	GG	AA	GG	GG	CC	AA	AA	TT	CC	GG	GG	CC	GA	CT	GG	GG	CC	AA	TT	del--del--	GA	TT	CT	CC	TT	CC	NA	GG	TA	GG	AA	CC	TC	GG	AA	AA
251	Casertana	CC	GG	GG	GG	CC	GG	GT	CC	AA	NA	TT	TC	GG	GG	CC	GA	TT	GG	GG	CC	AA	TT	del--del--	GG	TT	CC	CC	TT	AC	NA	GG	TT	GG	AA	TC	TT	GG	AA	AA
252	Casertana	TT	GG	GG	GT	AA	GG	GG	CT	AA	GA	AA	TC	GG	GG	CC	GG	CC	GG	GG	CC	AA	TT	del--del--	GG	TT	CT	CC	TT	AC	CC	GA	TA	GG	AA	CC	TT	GG	AA	AA
253	Casertana	NA	GG	GG	GG	AC	GG	GG	CC	AA	NA	TT	TT	GT	GG	CC	GA	CC	GG	GA	NA	GA	TT	del--del--	AA	TT	CT	CC	TT	CC	CC	GG	AA	NA	GA	CC	TC	GG	AA	AA
254	Casertana	CT	GG	GG	GT	CC	GG	GG	CC	AA	GA	TT	TT	GG	GG	CC	AA	CC	GG	GG	CC	AA	TT	del--del--	GA	TT	CC	CC	TT	AC	CC	GG	AA	NA	GA	TC	TC	GG	AA	AA
255	Casertana	CT	GG	NA	GT	CC	GG	GG	CC	AA	GG	TT	TT	GG	GG	CC	AA	CC	GG	GG	CC	AA	TT	del--del--	AA	TT	CT	CC	TT	AC	CC	GG	AA	GG	GA	TT	TT	GG	AA	AA
256	Casertana	CT	GG	GG	GT	CC	GG	GG	CC	AA	NA	TT	TT	GG	GG	CC	AA	CC	GG	GG	CC	AA	TT	del--del--	AA	TT	TT	CC	TT	AC	CC	GG	AA	GG	GA	TT	TC	GG	AA	AA
257	Casertana	TT	GG	GG	GT	AA	GA	GG	CC	AA	NA	AA	TC	GT	GG	CC	GG	CC	GG	GG	CC	AA	TT	del--del--	GG	TT	CC	CG	TT	AC	CC	GG	TA	GG	AA	CC	TC	GG	AA	AA
258	Casertana	TT	GG	GG	GT	CC	GG	GG	CC	AA	GA	TT	TT	GG	GG	CC	AA	NA	GG	GG	CC	AA	TT	del--del--	GA	TT	TT	CC	TT	AC	CC	GG	AA	GG	GA	TC	TC	GG	AA	AA
259	Casertana	CC	GG	GG	GG	AC	GG	GG	CC	AA	NA	AT	TC	GG	GG	CC	AA	CC	GG	GG	CC	AA	TT	del--del--	AA	TT	CT	CC	TT	AC	CC	GA	AA	GG	GA	CC	TT	GG	AA	AA
260	Casertana	CT	GG	GG	GG	AC	GG	GG	CC	AA	NA	AT	CC	GT	GG	CC	GA	CC	GG	GG	CC	AA	TT	del--del--	GA	TT	CT	CC	TT	AC	CC	GG	AA	GG	AA	CC	TT	GG	AA	AA
261	Casertana	CT	GG	NA	GG	AC	GG	GG	CC	AA	GG	TT	TC	GG	GG	CC	GA	CC	GG	GG	CC	AA	TT	del--del--	AA	TT	CT	CC	TT	AC	CC	GA	AA	GG	AA	CC	TT	GG	AA	AA
262	Casertana	CC	GG	NA	GG	CC	GG	GT	CC	AA	GG	AA	CC	GG	GG	CC	GG	NA	GG	GG	CC	AA	TT	del--del--	GG	TC	CC	CC	TT	AA	NA	GG	TT	GG	AA	CC	TC	TG	AA	AA
263	Casertana	CC	GG	GG	GG	AC	GG	GG	CC	AA	NA	TT	TC	GT	AG	CC	AA	CC	GG	GG	CC	AA	TT	del--del--	GG	TC	CT	CC	TC	AC	NA	GG	TA	GG	GA	TC	TC	GG	AA	AA
264	Casertana	TT	GA	NA	GT	AA	GG	GG	CT	AA	GG	AT	CC	GG	GG	CC	GG	CC	GG	GA	CT	GA	TT	del--del--	GG	TT	CT	CC	TT	AA	AA	GG	TA	GG	GA	CC	TT	GG	AA	AA
265	Casertana	CT	GG	GG	GT	AA	GG	GG	CC	AA	GA	TT	CC	GG	GG	CC	AA	CC	GG	GG	CC	AA	TT	del--del--	GG	TT	CT	CC	TT	AC	CC	GG	TT	GG	AA	CC	TT	GG	AA	AA
266	Casertana	TT	GG	NA	GT	AA	GA	GG	CC	AA	GG	AT	TT	GG	GG	CC	GG	CC	GG	GG	CC	AA	TT	insCCdel--	GG	TT	CT	CC	TT	AC	CC	GG	TA	GG	AA	CC	TC	GG	AA	AA
267	Casertana	CT	GG	GG	TT	AA	AA	GG	CC	AA	GA	AA	TC	GG	GG	CC	GG	CC	GG	GG	CC	AA	TT	del--del--	GG	TC	TT	CC	TT	CC	CC	GA	TA	GG	AA	CC	TC	GG	AA	AA
268	Casertana	CC	GG	GG	GT	AC	GA	GG	CT	AA	NA	AT	TC	GG	GG	CC	GG	CC	GG	GG	CC	AA	TT	del--del--	GG	TC	CT	CG	TT	CC	CC	GG	TA	GG	AA	CC	TT	GG	AA	AA
269	Casertana	TT	GG	GG	GT	AA	AA	GG	CC	AA	NA	AT	TC	GG	GG	CC	GG	CC	GG	GG	CC	AA	TT	del--del--	GG	TT	TT	CC	TT	CC	CC	GG	TT	GG	AA	CC	TC	GG	AA	AG
270	Casertana	TT	GG	GG	GT	AA	GA	GG	CT	AA	GA	AA	TC	GT	GG	CC	GG	CC	GG	GG	CC	AA	TT	insCCdel--	GG	TT	TT	CG	TT	AC	CC	GG	TA	GG	AA	CC	TC	GG	AA	AA
271	Casertana	CT	GG	GG	GG	AC	GG	GG	CC	AA	NA	TT	CC	GG	GG	CC	GA	CT	GG	GG	CC	AA	TT	del--del--	GG	TT	CT	CC	TT	AC	CC	GG	TT	GG	AA	CC	CC	GG	AA	AA
272	Casertana	TT	GG	GG	GG	AC	GA	GG	TT	AA	NA	AA	TC	GG	GG	CC	GG	CC	GG	GG	CC	AA	TT	del--del--	GG	TC	CC	CG	TT	CC	CC	GG	TA	GG	GA	CC	TT	GG	AA	AA
273	Casertana	TT	GG	GG	GT	AA	AA	GG	CT	AA	GA	AA	TT	GT	GG	CC	GG	CC	GG	GG	CC	AA	TT	del--del--	GG	TT	CT	GG	TT	AC	CC	GG	TA	GG	AA	CC	TT	GG	AA	AA
274	Casertana	CT	GG	NA	GT	AA	AA	GG	CC	AA	GG	AA	TT	GG	GG	CC	GG	CC	GG	GG	CC	AA	TT	insCCdel--	GG	TC	CC	CC	TT	CC	CC	GG	AA	GG	AA	CC	TT	GG	AA	AA
275	Casertana	CT	GG	GG	GG	AC	AA	GG	CC	AA	NA	AT	TC	GG	GG	CT	GG	CC	GG	GG	CC	AA	TT	del--del--	GG	TC	CT	CG	TT	CC	CC	GG	AA	GG	AA	CC	TT	GG	AA	AA
276	Casertana	CT	GG	GG	GG	AA	GA	GG	CC	AA	GA	AT	TT	GG	GG	CC	GG	CC	GG	GG	CC	AA	TT	del--del--	GG	TC	TT	CG	TT	CC	CC	GG	TA	GG	AA	CC	TT	GG	AA	AA
277	Casertana	TT	GG	GG	GG	AA	AA	GG	CC	AA	GA	AA	TT	GT	GG	CC	GG	CC	GG	GG	CC	AA	TT	del--del--	GG	TT	CT	CG	TT	CC	CC	GG	TA	GG	AA	CC	TT	GG	AA	AA
278	Casertana	TT	GG	GG	GT	AA	GG	GG	CT	AA	NA	TT	CC	GG	GG	CC	GA	TT	GG	GG	CC	AA	TT	insCCdel--	GG	TT	TT	CC	TT	AA	CC	GA	AA	GG	AA	CC	TT	GG	AA	AA
279	Casertana	CT	GG	GG	GT	AA	GA	GG	CC	AA	AA	AA	TT	GT	GG	CC	GG	CC	GG	GG	CC	AA	TT	insCCdel--	GG	TT	CT	CG	TT	AC	CC	GG	AA	GG	AA	CC	TC	GG	AA	AA
280	Casertana	CT	GA	GG	GG	AC	GG	GG	CT	AA	NA	AT	CC	GT	AA	CC	AA	CC	GG	GG	CC	AA	TT	del--del--	GG	TT	CT	CC	TC	CC	NA	GG	TA	GG	GA	CC	TT	GG	AA	AA
281	Casertana	CC	GG	GG	GG	AC	GG	GG	CC	AA	NA	AT	TC	GG	GG	CT	GG	CC	GG	GG	CC	AA	TT	del--del--	GG	TT	TT	CC	TT	CC	CC	GG	TA	GG	AA	CC	TT	GG	AA	AA
282	Casertana	CT	GG	GG	GT	AA	GA	GG	CC	AA	GA	AA	TC	GG	GG	CC	GG	CC	GG	GG	CC	AA	TT	insCCdel--	GG	TC	CC	CC	TT	AA	CC	GG	TA	GG	AA	CC	CC	GG	AA	AA
283	Casertana	CT	GG	GG	TT	AA	AA	GG	CC	AA	GA	AA	TT	GT	GG	CC	GG	CC	GG	GG	CC	AA	TT	insCCdel--	GG	TT	CT	CG	TT	CC	CC	GG	TA	GG	AA	CC	TC	GG	AA	AA
284	Casertana	CT	GG	GG	TT	AA	AA	GG	CC	AA	NA	AA	TT	GG	GG	CC	GG	CC	GG	GG	CC	AA	TT	del--del--	GG	TT	TT	CG	TT	CC	CC	GG	TA	GG	AA	CC	TC	GG	AA	AA
285	Casertana	TT	GG	GG	GG	AA	AA	GG	CC	AA	GA	AA	TT	GT	GG	CC	GG	CC	GG	GG	CC	AA	TT	insCCdel--	GG	TC	TT	CG	TT	AC	CC	GG	TA	GG	AA	CC	TC	GG	AA	AA
286	Cinta Senese	CC	GA	NA	GG	CC	GG	GT	CT	AA	GG	AT	CC	GT	GG	TT	AA	CC	GG	GG	CC	AA	TT	del--del--	AA	TT	CC	CC	TT	AA	CC	GG	TT	GG	GG	CC	TT	GG	AA	AA
287	Cinta Senese	CC	GA	GG	TT	AC	GG	GG	CT	AA	AA	AT	TC	TT	GG	TT	AA	CC	GG	GG	CC	AA	TT	insCCdel--	GA	CC	CC	CC	TT	AC	CC	GG	TT	GG	GG	CC	TT	GG	AA	AA
288	Cinta Senese	CC	AA	GG	GG	AC	GG	GG	CT	AA	NA	AA	CC	GG	AA	TT	AA	CC	GG	GA	CT	GA	TT	del--del--	AA	CC	CT	CC	TT	AC	CC	GG	TT	GG	GA	CC	TT	TT	AA	AA
289	Cinta Senese	CC	AA	GG	GT	CC	GA	GT	CT	AA	GA	AT	CC	GT	AG	TT	GA	TT	GG	GG	CC	AA	TT	del--del--	GA	TT	CC	CC	NA	AC	CC	GG	TT	GG	GG	CC	TT	TG	AA	AA
290	Cinta Senese	CC	AA	GG	GG	CC	GA	GT	CT	AA	NA	AT	CC	GT	AG	TT	GA	CC	GG	GG	CC	AA	TT	del--del--	GA	TT	CC	CC	TT	AC	CC	GG	TT	GG	GA	CC	TT	GG	AA	AA
291	Cinta Senese	TT	GG	NA	TT	AC	AA	GT	TT	AA	GG	TT	TC	GT	AG	TT	AA	CC	GG	GG	CC	AA	TT	del--del--	GA	TC	CC	CC	TT	CC	CC	GG	TT	GG	GA	CC	TT	GG	AA	AA
292	Cinta Senese	NA	NA	NA	NA	AC	AA	GG	CT	AA	NA	AT	NA	GG	NA	NA	GA	NA	GG	NA	NA	AA	NA	del--del--	GA	NA	CC	CG	TT	AA	CC	NA	TT	NA	NA	CC	TT	GG	AA	NA
293	Cinta Senese	CC	GG	GG	GG	CC	NA	GT	CC	AA	GA	TT	CC	GT	AG	TT	GG	CT	GG	GG	CC	AA	TT	del--del--	AA	TT	CC	CG	TT	AC	CC	GG	TT	GG	GG	CC	TT	GG	AA	AA
294	Cinta Senese	CC	AA	GG	GG	CC	NA	GT	CT	AA	AA	TT	CC	TT	AG	TT	GA	CC	GG	GG	CC	AA	TT	del--del--	AA	TT	CC	CC	TT	CC	CC	GG	TT	GG	GG	CC	TT	TG	AA	AA
295	Cinta Senese	CC	GG	GG	GG	CC	GG	GT	CT	AA	GA	TT	CC	GT	AG	TT	GA	CC	GG	GG	CC	AA	TT	del--del--	AA	TT	CC	CC	TT	CC	CC	GG	TT	GG	GA	CC	TT	GG	AA	AA
296	Cinta Senese	CT	GA	GG	GT	CC	GA	GT	CT	AA	GA	TT	CC	GT	GG	TT	GG	CC	GG	GA	CT	GA	TT	del--del--	AA	TT	TT	CG	TT	AC	CC	GG	TT	GG	GA	CC	CC	TT	AA	AA
297	Cinta Senese	CC	AA	GG	TT	CC	AA	GT	TT	AA	GA	TT	CC	TT	GG	TT	GA	CC	GG	GG	CC	AA	TT	del--del--	AA	TC	CC	CC	TT	AC	CC	GG	TT	GG	GA	CC	TT	TG	AA	AA
298	Cinta Senese	CC	GA	GG	GT	AC	AA	GG	CC	NA	GA	TT	CC	GT	GG	TT	AA	CC	GG	GG	CC	AA	TT	del--del--	AA	TC	CC	CC	TT	AA	CC	GG	TT	GG	GG	CC	TT	TG	AA	AA
299	Cinta Senese	TT	GA	GG	GT	AC	NA	GT	CT	AA	GA	TT	TC	GG	GG	TT	GA	CC	GG	GG	CC	AA	TT	del--del--	GA	TT	CC	CC	TT	AC	CC	GG	TT	GG	GA	CC	TT	GG	AA	AA
300	Cinta Senese	CC	AA	GG	GT	AC	AA	GG	CT	AA	AA	AT	CC	GT	GG	TT	GG	CC	NA	GG	CC	AA	TT	insCCdel--	GA	NA	CC	CC	TT	AA	CC	GG	TT	GG	GG	CC	TT	GG	AA	AA
301	Cinta Senese	CC	AA	NA	TT	CC	NA	GT	CC	AA	GG	TT	CC	GG	GG	TT	AA	CC	GG	GA	CT	GA	TT	del--del--	AA	TT	CC	CC	TT	AC	CC	GG	TT	GG	GA	CC	TT	TT	AA	AA
302	Cinta Senese	CC	GA	GG	GG	CC	GG	GT	CC	AA	NA	AT	CC	GT	NA	TT	AA	CC	GG	GG	CC	AA	TT	del--del--	GA	TT	CC	CC	TT	AC	CC	GG	TT	GG	GG	CC	TT	GG	AA	AA
303	Cinta Senese	CC	AA	GG	GT	CC	AA	GG	TT	AA	GA	AT	CC	TT	GG	TT	GA	CC	GG	GG	CC	AA	TT	del--del--	GA	TC	CC	CC	TT	AA	CC	GG	TT	GG	GA	CC	TT	GG	AA	AA
304	Cinta Senese	CC	GA	GG	GT	CC	NA	GG	CT	AA	GA	AT	CC	GT	GG	TT	AA	CC	GG	GG	CC	AA	TT	insCCdel--	GA	TC	CC	CC	TT	AC	CC	GG	TT	GG	GG	CC	TT	TG	AA	AA
305	Cinta Senese	CC	AA	GG	TT	CC	NA	TT	CT	AA	GA	AT	CC	GT	GG	TT	GG	CT	GG	GG	CC	AA	TT	insCCdel--	GA	TT	CC	CC	TT	AC	CA	GG	TT	GG	GA	CC	TT	TG	AA	AA
306	Cinta Senese	CT	GA	GG	GG	CC	NA	GT	TT	AA	GA	TT	CC	TT	GG	TT	GG	CC	GG	GG	CC	AA	TT	insCCdel--	GA	TC	CC	CC	TT	CC	CC	GG	TT	GG	GA	CC	TT	GG	AA	AA
307	Cinta Senese	CC	AA	GG	GT	CC	AA	GT	CC	AA	GA	TT	CC	GT	GG	TT	AA	CT	GG	GG	CC	AA	TT	del--del--	AA	TT	CC	CG	TT	CC	CC	GG	TT	GG	GA	CC	TT	GG	AA	AA
308	Cinta Senese	CT	GG	NA	TT	CC	AA	GT	TT	AA	GG	AT	CC	GT	GG	TT	GA	CC	GG	GG	CC	AA	TT	del--del--	AA	CC	CT	CC	TT	AA	CC	GG	TA	GG	AA	CC	TT	TG	AA	AA
309	Cinta Senese	CC	GG	NA	TT	CC	AA	GG	TT	AA	GG	TT	TC	GT	GG	TT	GA	CC	GG	GG	CC	AA	TT	del--del--	AA	TC	CT	CC	TT	AC	CC	GG	TT	GG	GA	CC	TT	TG	AA	AA
310	Cinta Senese	CC	AA	GG	GG	AC	AA	TT	TT	AA	GA	TT	TC	GG	GG	TT	GA	CT	GG	GG	CC	AA	TT	del--del--	GA	TT	CC	CC	TT	AC	CC	GG	TT	GG	GG	CC	TT	TG	AA	AA
311	Cinta Senese	CC	GA	NA	GG	CC	NA	GG	CT	AA	GG	AT	CC	GT	GG	CT	GA	CC	GG	GG	CC	AA	TT	insCCdel--	AA	CC	CC	CC	TT	AA	CC	GG	TT	GG	GA	CC	TT	GG	AA	AA
312	Cinta Senese	CC	GG	NA	TT	AC	NA	GG	CC	AA	GG	TT	CC	TT	GG	TT	AA	CC	GG	GG	CC	AA	TT	insCCdel--	GA	TC	CC	CC	TT	AA	CC	GG	TT	GG	GG	CC	TT	TG	AA	AA
313	Cinta Senese	CC	AA	GG	GT	AC	AA	GG	CC	AA	GA	AT	TC	TT	GG	CT	AA	CC	GG	GG	CC	AA	TT	del--del--	GG	TT	CC	CC	TT	AC	CC	GG	TT	GG	GA	CC	TT	TG	AA	AA
314	Cinta Senese	CT	AA	GG	TT	CC	NA	GT	CT	AA	GA	AA	CC	GG	GG	TT	GG	CC	GG	GG	CC	AA	TT	insCCdel--	GA	TC	CC	CC	TT	AA	CC	GG	TT	GG	GG	CC	TC	TG	AA	AA
315	Cinta Senese	CT	AA	GG	TT	AC	NA	GG	TT	AA	GA	AT	CC	GG	GG	TT	GA	CC	GG	GG	CC	AA	TT	insCCdel--	GA	TC	CT	CC	TT	AC	CC	GG	TT	GG	GA	CC	TT	GG	AA	AA
316	Cinta Senese	CC	GA	NA	GG	CC	NA	GT	CC	AA	GG	AT	CC	GT	GG	TT	GA	CC	GG	GG	CC	AA	TT	del--del--	GA	TT	CC	CC	TT	CC	CA	GG	TT	GG	GA	CC	TT	GG	AA	AA
317	Cinta Senese	CC	GA	GG	TT	CC	AA	GG	CC	AA	GA	AT	CC	GG	GG	TT	AA	CC	GG	GA	CT	GA	TT	del--del--	AA	TT	CC	CC	TT	AA	CA	GG	TT	GG	GA	CC	TT	TG	AA	AA
318	Cinta Senese	CT	GG	NA	GT	AC	GA	GT	CT	AA	GG	TT	CC	TT	GG	TT	GG	CC	GG	GA	CT	GA	TT	del--del--	GA	TT	CC	CC	TT	CC	CC	GG	TT	GG	GG	CC	TC	GG	AA	AA
319	Cinta Senese	CT	AA	GG	GT	CC	NA	GT	CC	AA	GA	TT	TC	GT	GG	TT	GA	CC	GG	GG	CC	AA	TT	insCCdel--	AA	CC	CC	CC	TT	AC	CC	GG	TA	GG	GA	CC	TT	GG	AA	AA
320	Cinta Senese	CT	GG	NA	TT	AC	GG	GG	CC	AA	GG	AT	CC	TT	AG	TT	GG	CC	GG	GG	CC	AA	TT	del--del--	AA	TC	CC	CC	TT	AC	CC	GG	TA	GG	GG	CC	TT	GG	AA	AA
321	Cinta Senese	CC	GG	GG	TT	CC	GG	GG	CT	AA	GA	TT	CC	GT	GG	TT	AA	CT	GG	GG	CC	AA	TT	del--del--	GA	TC	CT	CC	TT	AC	CC	GG	TT	GG	GA	CC	TT	TG	AA	AA
322	Cinta Senese	CC	AA	GG	TT	AC	NA	GT	CT	AA	GA	AA	TC	GT	GG	TT	NA	CC	GG	GG	CC	AA	TT	del--del--	AA	TC	CC	CC	TT	AC	CC	GG	TT	GG	GA	CC	TT	TG	AA	AA
323	Cinta Senese	CT	AA	NA	GT	CC	AA	GT	CT	AA	GG	TT	CC	GT	GG	TT	GG	CC	GG	GG	CC	AA	TT	del--del--	GA	CC	CC	CC	TT	AA	CC	GG	TT	GG	GA	CC	TT	GG	AA	AA
324	Cinta Senese	CC	AA	GG	GT	AC	AA	GG	TT	AA	GA	AT	TC	GT	AG	TT	GA	CC	GG	GG	CC	AA	TT	insCCdel--	GG	TC	CC	CG	NA	AA	CC	GG	TT	GG	GA	CC	TT	GG	AA	AA
325	Cinta Senese	CC	AA	GG	GG	CC	AA	GT	CC	AA	GA	AT	CC	GG	GG	TT	AA	CT	GG	GA	CT	GA	TT	del--del--	AA	TT	CC	CC	TT	CC	CA	GG	TT	GG	GA	CC	TT	GG	AA	AA
326	Cinta Senese	CC	GA	GG	GT	AC	NA	GG	CC	AA	GA	AT	CC	GT	GG	TT	GG	CT	GG	GG	CC	AA	TT	del--del--	GA	TT	CC	CC	TT	AC	CC	GG	TT	GG	GG	CC	TT	GG	AA	AA
327	Cinta Senese	CT	AA	GG	GG	AC	AA	GT	CT	AA	GA	AT	TC	GT	GG	TT	GA	CC	GG	GG	CC	AA	TT	del--del--	GA	TC	CC	CG	TT	AC	CC	GG	TT	GG	GA	CC	TT	TG	AA	AA
328	Cinta Senese	CT	GA	GG	GG	CC	NA	GG	TT	AA	GA	AT	CC	TT	GG	TT	GA	CT	GG	GG	CC	AA	TT	insCCdel--	AA	CC	CC	CC	TT	AA	CC	GG	TT	GG	GA	CC	TT	TG	AA	AA
329	Cinta Senese	CC	AA	GG	TT	CC	AA	GT	CT	AA	AA	TT	CC	GG	GG	TT	GA	CC	GG	GG	CC	AA	TT	insCCdel--	AA	TT	CC	CC	TT	CC	CC	GG	TT	GG	GA	CC	TT	GG	AA	AA
330	Cinta Senese	CC	GG	GG	GT	CC	AA	GG	CT	AA	GA	AT	CC	TT	GG	TT	GG	CT	GG	GG	CC	AA	TT	del--del--	AA	TT	CC	CC	TT	AC	CC	GG	TT	GG	GG	CC	TT	GG	AA	AA
331	Cinta Senese	CC	AA	GG	GT	CC	NA	GT	CT	AA	GA	AT	CC	GT	AG	TT	GA	CT	GG	GG	CC	AA	TT	insCCdel--	AA	TC	CT	CC	TT	CC	CC	GG	TT	GG	GA	CC	TT	TG	AA	AA
332	Cinta Senese	CT	AA	NA	GT	CC	GA	GG	CC	AA	GG	AT	TC	GT	GG	TT	GA	CC	GG	GG	CC	AA	TT	insCCdel--	GA	TC	CC	CC	TT	AA	CC	GG	TT	GG	GA	TC	TT	TG	AA	AA
333	Gascon	TT	GG	GG	GT	CC	AA	GG	TT	AA	GA	AA	TC	GT	GG	CC	GA	CC	GG	GG	CC	AA	TT	del--del--	AA	TT	CC	CC	TT	CC	CC	GG	TA	GG	GG	CC	TC	GG	AA	AA
334	Gascon	CT	GA	GG	TT	CC	GA	GG	CT	AA	NA	TT	TC	TT	GG	CC	GA	TT	GG	GG	CC	AA	TT	del--del--	AA	TT	CT	CC	TT	CC	CC	GG	AA	GG	GA	CC	TC	GG	AA	AA
335	Gascon	TT	GG	GG	GT	CC	GA	GG	TT	AA	GA	TT	TT	GT	GG	CC	GA	CC	GG	GG	CC	AA	TT	del--del--	AA	TT	TT	CC	TT	CC	CC	GG	TA	GG	GG	CC	TT	GG	AA	AA
336	Gascon	CT	GG	GG	TT	AC	GA	GG	TT	AA	NA	TT	TC	GT	GG	CC	GG	CC	GG	GG	CC	AA	TT	del--del--	AA	TT	TT	CC	TT	CC	CC	GG	TA	GG	GG	CC	TT	GG	AA	AA
337	Gascon	CT	GG	GG	TT	CC	GA	GG	TT	AA	AA	AA	TC	GG	GG	CC	GG	CC	GG	GG	CC	AA	TT	del--del--	AA	TT	CT	CC	TT	CC	CC	GG	TA	GG	GA	CC	TT	GG	AA	AA
338	Gascon	TT	GG	GG	TT	CC	GA	GG	TT	AA	NA	AT	TT	GG	GG	CC	GA	CC	GG	GG	CC	AA	TT	del--del--	GG	TT	CT	CG	TT	AC	CC	GG	TT	GG	GG	CC	TT	GG	AA	AG
339	Gascon	CT	GG	GG	GG	AC	GG	GG	CT	AA	NA	AT	TC	GT	GG	CC	GA	CC	GG	GG	CC	AA	TT	del--del--	GA	TT	CC	CG	TT	CC	CC	GG	TA	GG	GG	CC	TT	GG	AA	AA
340	Gascon	TT	GG	GG	TT	CC	GA	GG	TT	AA	GA	TT	TT	GG	GG	CC	AA	CC	GG	GG	CC	AA	TT	del--del--	GA	TT	TT	CC	TT	CC	CC	GG	TA	GG	GG	CC	TC	GG	AA	AA
341	Gascon	CT	GG	GG	TT	CC	GA	GG	TT	AA	NA	TT	TT	GG	GG	CC	AA	CC	GG	GG	CC	AA	TT	del--del--	GA	TT	CT	CG	TT	CC	CC	GG	AA	GG	GA	CC	TC	GG	AA	AA
342	Gascon	CT	GG	GG	TT	CC	AA	GG	CT	AA	NA	TT	TT	GG	GG	CC	AA	CC	GG	GG	CC	AA	TT	del--del--	GA	TT	TT	CC	TT	CC	CC	GG	TA	GG	GA	CC	TC	GG	AA	AA
343	Gascon	TT	GG	GG	TT	CC	GG	GG	CC	AA	AA	AA	TC	GG	GG	CC	GG	CT	GG	GG	CC	AA	TC	del--del--	AA	TT	CT	CC	TT	AC	NA	GG	TA	GG	GA	CC	TT	GG	AA	AA
344	Gascon	TT	GG	GG	GT	CC	AA	GG	CT	AA	NA	AT	TC	GG	GG	CC	GG	CC	GG	GG	CC	AA	TT	del--del--	GA	TC	CT	CC	TT	CC	CC	GG	TT	GG	AA	CC	TT	GG	AA	AA
345	Gascon	CC	GG	GG	TT	CC	GA	GG	TT	AA	AA	AT	TT	GG	GG	CC	GA	CC	GG	GG	CC	AA	TT	del--del--	AA	TT	TT	CC	TT	CC	CC	GG	TA	GG	GG	CC	TT	GG	AA	AA
346	Gascon	CT	GG	GG	GG	AC	AA	GG	TT	AA	AA	TT	CC	GT	GG	CC	AA	CC	GG	GG	CC	AA	TT	del--del--	GA	TT	CT	CG	TT	CC	CC	GG	TT	GG	GG	CC	TT	GG	AA	AA
347	Gascon	TT	GG	GG	TT	AC	AA	GG	TT	AA	NA	AT	CC	GT	GG	CC	GA	CC	GG	GG	CC	AA	TT	del--del--	AA	TT	CT	CG	TT	CC	CC	GG	TT	GG	GA	CC	TT	GG	AA	AA
348	Gascon	CT	GG	GG	TT	AC	GA	GG	CT	AA	NA	TT	CC	GG	GG	CC	GA	CC	GG	GG	CC	AA	TT	del--del--	GA	TT	CC	CG	TT	CC	CC	GG	TA	GG	GG	CC	TT	GG	AA	AA
349	Gascon	TT	GG	GG	TT	AC	GG	GT	TT	AA	GA	TT	CC	GG	GG	CC	GA	CC	GG	GG	CC	AA	TT	del--del--	GA	TC	TT	CC	TT	CC	CC	GG	TT	GG	GG	CC	TT	GG	AA	AA
350	Gascon	CT	GG	GG	TT	AC	GG	GG	TT	AA	GA	AA	CC	GG	GG	CC	GA	CC	GG	GG	CC	AA	TT	del--del--	AA	TT	CC	CG	TT	CC	CC	GG	AA	GG	AA	CC	TT	GG	AA	AA
351	Gascon	CT	GG	GG	GT	CC	GG	GG	TT	AA	GA	AT	CC	GG	GG	CC	GA	CC	GG	GG	CC	AA	TT	del--del--	GA	TC	CT	GG	TT	CC	NA	GG	TA	GG	GG	CC	TT	GG	AA	AA
352	Gascon	TT	GG	GG	GT	AC	GA	GG	TT	AA	GA	AT	TC	GT	GG	CC	GA	CC	GG	GG	CC	AA	NA	del--del--	GA	TT	CT	CC	TT	CC	CC	GG	TA	GG	GG	TC	TT	GG	AA	AA
353	Gascon	CT	GG	GG	GT	CC	GA	GG	TT	AA	AA	AA	TC	GG	GG	CC	GA	CC	GG	GG	CC	AA	TT	del--del--	GA	TT	TT	CC	TT	AC	NA	GG	TT	GG	GA	CC	TT	GG	AA	AA
354	Gascon	CC	GG	GG	TT	AC	GA	GT	TT	AA	GA	AA	TC	GT	GG	CC	GA	TT	GG	GG	CC	AA	TT	del--del--	GA	TT	CT	CC	TT	CC	CC	GG	NA	GG	GA	TC	TT	GG	AA	AA
355	Gascon	CT	GG	GG	TT	CC	GG	GG	TT	AA	NA	AA	TC	GG	GG	CC	GA	CT	GG	GG	CC	AA	TT	del--del--	GA	TT	CT	CC	TT	CC	CC	GG	TA	GG	AA	CC	TT	GG	AA	AA
356	Gascon	CT	GG	GG	GT	CC	GA	GG	CT	AA	NA	TT	TC	GG	GG	CC	GA	CC	GG	GG	CC	AA	TT	insCCdel--	GA	TT	CT	CG	TT	CC	CC	GG	TT	GG	GG	CC	TC	GG	AA	AA
357	Gascon	CT	GG	GG	GT	CC	AA	GG	TT	AA	NA	AT	TC	GG	GG	CC	AA	CT	GG	GG	CC	AA	TT	del--del--	GA	TT	TT	CC	TT	AC	CC	GG	TA	GG	GA	CC	TC	GG	AA	AA
358	Gascon	CT	GG	GG	TT	CC	AA	GG	TT	AA	NA	AA	TC	GT	GG	CC	GA	CC	GG	GG	CC	AA	TT	del--del--	GA	TC	CT	CC	TT	AC	CC	GG	TA	GG	GG	CC	TT	GG	AA	AA
359	Gascon	TT	GG	GG	GT	AC	GG	GG	TT	AA	NA	AT	CC	GG	GG	CC	GA	CC	GG	GG	CC	AA	TT	NA	GG	TT	TT	CC	TT	CC	CC	GG	AA	GG	GA	CC	TT	GG	AA	NA
360	Gascon	CT	GG	GG	TT	CC	AA	GG	CT	AA	NA	AA	TT	GG	GG	CC	AA	CC	GG	GG	CC	AA	TT	del--del--	GA	TT	CC	CG	TT	CC	CC	GG	TT	GG	AA	CC	TT	GG	AA	AA
361	Gascon	TT	GG	GG	GT	CC	AA	GG	TT	AA	GA	AT	TC	GG	GG	CC	GA	CC	GG	GG	CC	AA	TT	del--del--	AA	CC	CT	CC	TT	AC	CC	GG	TA	GG	GA	CC	TT	GG	AA	AA
362	Gascon	CT	GG	NA	TT	CC	GG	GG	TT	AA	NA	AA	TT	GG	GG	CC	GG	CC	GG	GG	CC	AA	TT	del--del--	GA	TT	CC	CC	TT	AC	CC	GG	TA	GG	GG	CC	TT	GG	AA	AA
363	Gascon	CT	GG	GG	GT	AC	GA	GG	CC	AA	GA	AA	CC	GG	GG	CC	GA	CC	GG	GG	CC	AA	TT	del--del--	GA	TT	TT	CC	TT	AC	CC	GG	TA	GG	GG	CC	TT	GG	AA	AA
364	Gascon	CC	GG	GG	TT	CC	GA	GG	CT	AA	AA	AA	TC	GG	GG	CC	GA	CC	GG	GG	CC	AA	TT	del--del--	GA	TT	CT	CC	TT	CC	CC	GG	TA	GG	GA	CC	TT	GG	AA	AA
365	Gascon	CT	AA	GG	GT	AC	NA	GG	TT	AA	NA	AT	TC	GT	GG	CC	GA	TT	GG	GG	CC	AA	TT	del--del--	AA	TT	CT	CG	TT	CC	CC	GG	TA	GG	GG	CC	TC	GG	AA	AA
366	Gascon	TT	GG	GG	GG	CC	AA	GG	TT	AA	NA	TT	TC	GG	GG	CC	AA	CC	GG	GG	CC	AA	TT	del--del--	GA	TT	CT	CC	TT	AC	CC	GG	TA	GG	GG	CC	TT	GG	AA	AA
367	Gascon	CC	GG	GG	GT	AC	AA	GG	TT	AA	NA	AT	TC	GT	GG	CC	GA	CC	GG	GG	CC	AA	TT	del--del--	AA	TT	TT	CC	TT	CC	CC	GG	TA	GG	GA	CC	TT	GG	AA	AA
368	Gascon	TT	GG	GG	TT	CC	GA	GG	TT	AA	NA	AT	CC	GG	GG	CC	GG	CT	GG	GG	CC	AA	TT	del--del--	GA	TT	TT	CC	TT	CC	CC	GG	TA	GG	GG	CC	TT	GG	AA	AA
369	Gascon	CT	GG	GG	GT	CC	GA	GG	CT	AA	NA	TT	TC	GT	GG	CC	GA	CC	GG	GG	CC	AA	TT	del--del--	AA	TT	CT	CC	TT	CC	CC	GG	TA	GG	GA	CC	TT	GG	AA	AA
370	Gascon	TT	GG	GG	GG	CC	GG	GG	CT	AA	NA	AT	TC	GG	GG	CC	GA	CC	GG	GG	CC	AA	TT	del--del--	GA	TT	CT	CG	TT	AC	CC	GG	TA	GG	GG	CC	TT	GG	AA	AA
371	Gascon	CC	GG	GG	TT	CC	AA	GG	TT	AA	GA	AA	TC	GG	GG	CC	AA	CC	GG	GG	CC	AA	TT	insCCdel--	AA	TT	CT	GG	TT	CC	CC	GG	TA	GG	GG	CC	TT	GG	AA	AA
372	Gascon	CT	GG	GG	TT	AC	GG	GT	CT	AA	AA	AT	CC	GT	GG	CC	GA	CC	GG	GG	CC	AA	TT	del--del--	GA	TT	CC	CC	TT	CC	CC	GG	TT	GG	GA	CC	TT	GG	AA	AA
373	Gascon	CC	GG	GG	TT	CC	AA	GG	TT	AA	NA	TT	TC	GG	GG	CC	GG	CC	GG	GG	CC	AA	TT	del--del--	AA	TT	TT	CC	TT	AC	CC	GG	TT	GG	GA	CC	TC	GG	AA	AA
374	Gascon	TT	GG	GG	TT	CC	GA	GG	TT	AA	GA	AA	TC	GG	GG	CC	GA	CC	GG	GG	CC	AA	TT	del--del--	AA	TT	TT	CC	TT	AC	CC	GG	TA	GG	GA	CC	TT	GG	AA	AA
375	Gascon	CT	GG	GG	GT	CC	AA	GG	CT	AA	AA	TT	TC	GT	GG	CC	GG	CT	GG	GG	CC	AA	TT	del--del--	GA	TC	CT	CG	TT	CC	CC	GG	TT	GG	AA	CC	TT	GG	AA	AA
376	Gascon	TT	GG	GG	GT	AC	GA	GG	CT	AA	NA	AA	TC	GG	GG	CC	AA	CC	GG	GG	CC	AA	TT	del--del--	AA	TT	CT	CG	TT	CC	CC	GG	TA	GG	AA	CC	TT	GG	AA	AA
377	Gascon	TT	GG	GG	TT	AC	AA	GT	TT	AA	GA	TT	TT	GG	GG	CC	AA	CC	GG	GG	CC	AA	TT	del--del--	GA	TC	CT	CC	TT	CC	CC	GG	AA	GG	GG	TC	TT	GG	AA	AA
378	Gascon	CT	GG	GG	GT	CC	GA	GT	CT	AA	NA	AA	TC	GT	GG	CC	GA	CC	GG	GG	CC	AA	TT	del--del--	GA	TT	CT	CC	TT	CC	CC	GG	TA	GG	GG	CC	TT	GG	AA	AA
379	Gascon	CT	GG	GG	TT	CC	AA	GG	CC	AA	NA	TT	TC	GG	GG	CC	GA	CT	GG	GG	CC	AA	TT	del--del--	GA	TT	CT	CC	TT	AC	CC	GG	TA	GG	GA	CC	TT	GG	AA	AA
380	Gascon	CT	GG	GG	GT	AC	AA	GG	TT	AA	NA	AT	CC	GG	GG	CC	GA	CC	GG	GG	CC	AA	TT	del--del--	AA	TT	CC	CC	TT	AC	NA	GG	TA	GG	GG	CC	TT	GG	AA	AA
381	Iberian	CT	AA	GG	GT	AC	NA	GT	CC	AA	GA	TT	CC	GG	AG	CC	GA	TT	GG	GG	CC	AA	TT	del--del--	GG	TT	CC	CC	TT	AA	CC	GG	AA	GG	AA	CC	TT	GG	AA	AA
382	Iberian	CC	AA	GG	TT	AC	GG	TT	CC	AA	NA	TT	CC	GG	GG	CC	AA	TT	GG	GG	CC	AA	TT	insCCdel--	GG	TT	CC	CC	TT	AA	CC	GG	AA	GG	GG	CC	TT	GG	AA	AA
383	Iberian	CT	GG	NA	GT	CC	NA	GG	CC	AA	NA	TT	CC	GG	GG	CC	GA	NA	GG	GG	CC	AA	TT	insCCdel--	GG	TT	CC	CC	TT	AA	CC	GG	AA	GG	AA	CC	TT	GG	AA	AA
384	Iberian	CC	GG	GG	GG	AC	AA	GG	CC	AA	NA	AT	CC	GG	AG	CC	GA	TT	GG	GG	CC	AA	TT	insCCdel--	GG	TT	CC	CC	TT	AA	CC	GG	AA	GG	GA	CC	TT	GG	AA	AA
385	Iberian	CT	GG	GG	TT	CC	NA	GG	CC	AA	NA	TT	CC	GG	GG	CC	GG	TT	GG	GG	CC	AA	TT	insCCdel--	GG	TT	CT	CC	TT	AA	CC	GG	AA	GG	GA	CC	TT	GG	AA	AA
386	Iberian	CT	AA	NA	TT	AA	AA	GT	CC	AA	GG	AA	TC	GG	GG	CC	AA	TT	GG	NA	CC	GA	TT	insCCinsCC	GG	TT	CC	CC	TT	AA	CC	GG	AA	GG	GA	CC	TT	GG	AA	AA
387	Iberian	CT	AA	GG	TT	AC	NA	GG	CC	AA	AA	TT	CC	GG	AG	CC	AA	TT	GG	GG	CC	GA	TT	insCCinsCC	GA	TT	CC	CC	TT	AA	CC	GG	AA	GG	GG	CC	TT	GG	AA	AA
388	Iberian	CC	GG	GG	TT	AA	AA	GT	CC	AA	GA	AT	CC	GG	AG	CC	AA	TT	GG	GG	CC	GA	TT	insCCinsCC	GG	TT	CT	CG	TT	AC	CC	GG	AA	GG	GA	CC	TT	GG	AA	AA
389	Iberian	CT	GG	NA	TT	CC	AA	GT	CC	AA	GG	AT	CC	GT	GG	CC	AA	TT	GG	GG	CC	GA	TT	insCCinsCC	GG	TT	CT	CC	TT	AC	CC	GG	AA	GG	GG	CC	TT	GG	AA	AA
390	Iberian	CT	GG	GG	TT	CC	NA	TT	CC	AA	GA	AT	CC	GT	GG	CC	AA	TT	GG	GG	CC	GA	TT	insCCinsCC	GG	TT	CC	CC	TC	AA	CC	GG	AA	GG	AA	CC	TT	GG	AA	AA
391	Iberian	TT	GG	GG	TT	CC	GG	GT	CC	AA	AA	AT	CC	GG	GG	CC	AA	TT	GG	GG	CC	GA	TT	insCCinsCC	GG	TC	CC	CC	TC	AA	CC	GG	TA	GG	GA	CC	TT	GG	AA	AA
392	Iberian	CC	GG	GG	GT	CC	AA	TT	CC	AA	GA	AT	CC	GG	GG	CC	GA	TT	GG	GG	CC	GA	TT	insCCinsCC	GG	TC	CC	CC	TT	AC	CC	GG	TA	GG	AA	CC	TT	GG	AA	AA
393	Iberian	TT	AA	NA	TT	AC	AA	GG	CC	AA	NA	AT	CC	GT	GG	CC	AA	TT	GG	GG	CC	AA	TT	insCCinsCC	GG	TC	CC	CC	TC	AA	CC	GG	AA	GG	GA	CC	TT	GG	AA	AA
394	Iberian	TT	AA	GG	TT	AC	AA	GT	CC	AA	AA	AT	CC	GG	GG	CC	AA	TT	GG	GG	CC	AA	TT	insCCinsCC	GG	TC	CT	CC	TT	AA	NA	GG	AA	GG	GA	CC	TT	GG	AA	AA
395	Iberian	TT	GG	NA	TT	CC	NA	GT	CC	AA	NA	AT	CC	GG	GG	CC	AA	TT	GG	GG	CC	GA	TT	insCCinsCC	GA	TT	CT	CC	TT	AC	CC	GG	AA	GG	GA	CC	TT	GG	AA	AA
396	Iberian	CT	AA	GG	TT	AC	NA	GT	CC	AA	AA	TT	CC	GG	GG	CC	AA	TT	GG	GG	CC	AA	TT	insCCinsCC	GG	TT	CT	CC	TT	AA	CA	GG	AA	GG	GA	CC	TT	GG	AA	AA
397	Iberian	CT	GG	GG	GT	AA	NA	GT	CC	AA	AA	AT	CC	GG	GG	CC	AA	TT	GG	GG	CC	AA	TT	insCCinsCC	GG	TC	CT	CG	TT	AA	CC	GG	AA	GG	GG	CC	TT	GG	AA	AA
398	Iberian	TT	GG	GG	TT	AA	AA	GT	CC	AA	GA	TT	CC	GG	GG	CC	GA	TT	GG	GG	CC	GA	TT	insCCinsCC	GG	TT	CC	CC	TT	AA	CC	GG	AA	GG	AA	CC	TT	GG	AA	AA
399	Iberian	CT	AA	GA	TT	AA	AA	GT	CC	AA	GA	TT	CC	GG	AG	CC	AA	TT	GG	GG	CC	AA	TT	insCCdel--	GA	TT	CT	CC	TT	AA	AA	GG	AA	GG	GG	CC	TT	TG	AA	AA
400	Iberian	CT	GG	GG	TT	AA	AA	GT	CC	AA	GA	AT	CC	GG	GG	CC	GA	TT	GG	GG	CC	GA	TT	insCCinsCC	GG	TT	CC	CC	TT	AA	CC	NA	AA	GG	GA	CC	TT	GG	AA	AA
401	Iberian	NA	GG	GG	TT	AA	AA	GT	CC	AA	GA	TT	CC	GG	GG	CC	AA	TT	GG	GG	CC	GG	TT	insCCinsCC	GG	TT	CT	CC	TC	AA	CA	GG	AA	GG	AA	CC	TT	GG	AA	AA
402	Iberian	TT	GG	GG	TT	AA	AA	GT	CC	AA	GA	TT	CC	GG	GG	CC	AA	TT	GG	GG	CC	GA	TT	insCCinsCC	GG	TT	CC	CC	TT	AA	CC	GG	AA	GG	AA	CC	TT	GG	AA	AA
403	Iberian	CC	AA	GA	TT	AA	AA	GT	CC	AA	GA	AA	CC	GG	GG	CC	AA	TT	GG	GG	CC	GA	TT	insCCdel--	GG	TT	CT	CC	TC	AA	CC	GG	AA	GG	AA	CC	TT	GG	AA	AA
404	Iberian	TT	GA	GG	TT	AA	AA	GT	CC	AA	GA	TT	TC	GG	GG	CC	GG	TT	GG	GG	CC	GA	TT	insCCinsCC	GG	TT	CC	CC	TT	AA	CC	GG	AA	GG	AA	CC	TT	GG	AA	AA
405	Iberian	TT	GA	GG	TT	AC	AA	GG	CC	AA	GA	AT	TC	GG	GG	CC	AA	TT	GG	GG	CC	AA	TT	insCCinsCC	GA	TT	CT	CC	TC	AA	CC	GG	AA	GG	GA	CC	TT	GG	AA	AA
406	Iberian	CT	AA	GG	GT	AC	AA	GT	CC	AA	GA	TT	CC	GG	GG	CC	GA	TT	GG	GG	CC	AA	TT	insCCinsCC	GG	TT	CT	CG	TT	AA	CC	GG	AA	GG	GA	CC	TT	TG	AA	AA
407	Iberian	CT	GA	NA	TT	AA	NA	GT	CC	AA	GG	TT	CC	GG	GG	CC	GA	TT	GG	GG	CC	AA	TT	insCCinsCC	GG	TT	CC	CG	TT	AA	CC	GG	AA	GG	GG	CC	TT	GG	AA	AA
408	Iberian	TT	GA	GG	TT	AC	NA	GT	CT	AA	GA	TT	CC	GG	GG	CC	GA	TT	GG	GG	CC	AA	TT	insCCinsCC	GG	TT	CT	CC	TT	AA	CC	GG	AA	GG	GG	CC	TT	GG	AA	AA
409	Iberian	CC	GG	GG	TT	AA	AA	GT	CC	AA	GA	AA	CC	GT	GG	CC	GA	TT	GG	GG	CC	AA	TT	insCCinsCC	GG	TT	CC	CG	TC	AA	CC	GG	TA	GG	GA	CC	TT	GG	AA	AA
410	Iberian	CC	AA	GG	TT	AC	AA	TT	CC	AA	GA	TT	NA	GG	GG	CC	AA	TT	GG	GG	CC	AA	TT	insCCinsCC	GG	TT	CC	CC	TC	AA	CC	GG	AA	GG	GG	CC	TT	GG	AA	AA
411	Iberian	CC	GG	GG	TT	AA	GG	GT	CC	AA	AA	AT	CC	GT	GG	CC	AA	TT	GG	GG	CC	GG	NA	insCCinsCC	GG	TT	CT	CC	TT	AA	CC	GG	AA	GG	AA	CC	TT	GG	AA	AA
412	Iberian	CC	GG	GG	TT	AC	NA	GG	CC	AA	GA	TT	CC	GG	GG	CC	AA	TT	GG	GG	CC	AA	TT	insCCinsCC	GG	TT	CT	CC	TT	AA	CC	GG	AA	GG	AA	CC	TT	GG	AA	AA
413	Iberian	CT	GG	GG	TT	AC	GG	TT	CC	AA	GA	TT	CC	GT	GG	CC	GG	TT	GG	GG	CC	GG	TT	insCCinsCC	GG	TT	CC	CC	TC	AA	CC	GG	TA	GG	GG	CC	TT	GG	AA	AA
414	Iberian	TT	AA	GG	TT	AC	NA	TT	CT	AA	AA	TT	CC	GG	GG	CC	GA	TT	GG	GG	CC	GA	TT	insCCinsCC	GG	TT	CC	CC	TT	AA	CC	GG	AA	GG	AA	CC	TT	GG	AA	AA
415	Iberian	TT	GG	GG	TT	AA	NA	GG	CT	AA	AA	TT	CC	GG	GG	CC	GG	TT	GG	GG	CC	AA	TT	insCCinsCC	GA	TT	CT	CC	TT	AA	CC	GG	AA	GG	GA	CC	TT	GG	AA	AA
416	Iberian	TT	GA	GG	TT	AA	AA	GT	CT	AA	GA	AT	CC	GG	GG	CC	GG	TT	GG	GG	CC	AA	TT	insCCinsCC	GG	TT	CC	CC	TT	AA	CC	GG	AA	GG	AA	CC	TT	GG	AA	AA
417	Iberian	TT	GG	GG	TT	AC	NA	TT	CT	AA	NA	AT	CC	GG	GG	CC	GA	TT	GG	GG	CC	AA	TT	insCCinsCC	GG	TT	TT	CC	TT	AA	CC	GG	TA	GG	AA	CC	TT	TG	AA	AA
418	Iberian	CT	GA	GG	TT	AA	AA	TT	CC	AA	GA	AT	CC	GG	GG	CC	GA	TT	GG	GG	CC	GA	TT	insCCinsCC	GG	TT	CC	CC	TT	AA	CC	GG	AA	GG	AA	CC	TT	GG	AA	AA
419	Iberian	TT	GA	NA	TT	AA	AA	GG	CC	AA	NA	TT	TC	GG	GG	CC	GA	TT	GG	GG	CC	AA	TT	insCCinsCC	GG	TT	CC	CC	TT	AA	CC	GG	AA	GG	AA	CC	TC	TG	AA	AA
420	Iberian	CT	GG	GG	TT	CC	NA	GG	CC	AA	GA	TT	CC	GG	AG	CC	AA	TT	GG	GG	CC	AA	TT	insCCinsCC	GG	TT	CC	CC	TC	AA	CA	GG	AA	GG	AA	CC	TC	GG	AA	AA
421	Iberian	CT	AA	GG	TT	AA	AA	GT	CC	AA	GA	TT	CC	GG	GG	CC	AA	TT	GG	GG	CC	AA	TT	insCCinsCC	GG	TT	CC	CC	TT	AA	CC	GG	AA	GG	AA	CC	TT	GG	AA	AA
422	Iberian	CC	GG	GA	TT	AC	AA	GT	CC	AA	AA	TT	CC	TT	GG	CC	AA	TT	GG	GG	CC	GA	TT	insCCinsCC	GG	TT	CC	CC	TC	AA	CC	GG	AA	GG	AA	CC	TT	GG	AA	AA
423	Iberian	CC	GG	GG	TT	AC	AA	GT	CC	AA	GA	TT	TC	GG	GG	CC	AA	TT	GG	GG	CC	GA	TT	insCCinsCC	GG	TT	CC	CC	TT	AA	CC	GG	AA	GG	GA	CC	TT	GG	AA	AA
424	Iberian	CC	GA	GG	TT	AA	NA	TT	CC	AA	GA	TT	CC	GG	GG	CC	AA	TT	GG	GG	CC	GA	TT	insCCinsCC	GG	TT	CT	CC	TT	AA	CC	GG	AA	GG	AA	CC	TT	GG	AA	AA
425	Iberian	CT	GG	NA	TT	AA	NA	GG	CC	AA	GG	AT	CC	GG	GG	CC	GA	TT	GG	GG	CC	AA	TT	insCCinsCC	GG	TT	CC	CC	TT	AA	CC	GG	AA	GG	GA	CC	TT	GG	AA	AA
426	Iberian	CC	GG	GG	TT	AC	NA	GT	CC	AA	GA	TT	CC	GG	GG	CC	AA	TT	GG	GG	CC	AA	TT	insCCinsCC	GG	TT	TT	CC	TT	AA	CC	GG	TA	GG	GA	CC	TT	GG	AA	AA
427	Iberian	TT	GG	GG	TT	CC	NA	TT	CC	AA	GA	TT	TC	GG	GG	CC	AA	TT	GG	GG	CC	AA	TT	insCCinsCC	GG	TT	CC	CC	TT	AA	CC	GG	AA	GG	AA	CC	TT	TG	AA	AA
428	Iberian	CT	GG	GG	TT	AC	NA	GT	CC	AA	AA	AT	CC	GG	GG	CC	AA	TT	GG	GG	CC	GA	TT	insCCinsCC	GG	TT	CT	CC	TC	AA	CC	GG	AA	GG	AA	CC	TT	TG	AA	AA
429	Krskopolje	CC	GG	GG	TT	NA	NA	NA	NA	NA	GA	NA	CC	NA	NA	CC	NA	CT	NA	GG	CC	NA	TT	NA	NA	TT	NA	NA	NA	NA	NA	NA	NA	GG	GG	CC	NA	NA	NA	NA
430	Krskopolje	CT	GA	NA	GT	NA	NA	NA	NA	NA	GG	NA	TT	NA	NA	CC	NA	CT	NA	GG	CC	NA	TT	NA	NA	TC	NA	NA	NA	NA	NA	NA	NA	GG	GA	TC	NA	NA	NA	NA
431	Krskopolje	CT	GG	NA	TT	NA	NA	NA	NA	NA	GG	NA	TT	NA	NA	CC	NA	CC	NA	GG	CC	NA	TT	NA	NA	TC	NA	NA	NA	NA	NA	NA	NA	GG	GA	TC	NA	NA	NA	NA
432	Krskopolje	CT	AA	GA	GG	NA	NA	NA	NA	NA	GA	NA	CC	NA	NA	CC	NA	CC	NA	GG	CC	NA	TT	NA	NA	CC	NA	NA	NA	NA	NA	NA	NA	GG	GG	CC	NA	NA	NA	NA
433	Krskopolje	CT	GA	GA	GT	NA	NA	NA	NA	NA	GA	NA	TC	NA	NA	CC	NA	CT	NA	GG	NA	NA	TT	NA	NA	TC	NA	NA	NA	NA	NA	NA	NA	GG	GA	TT	NA	NA	NA	NA
434	Krskopolje	CT	AA	GG	TT	NA	NA	NA	NA	NA	GG	NA	TT	NA	NA	CT	NA	CT	NA	GG	CC	NA	TT	NA	NA	TT	NA	NA	NA	NA	NA	NA	NA	GG	GG	CC	NA	NA	NA	NA
435	Krskopolje	CT	GG	GA	GT	NA	NA	NA	NA	NA	GA	NA	TC	NA	NA	CC	NA	CC	NA	GA	CT	NA	TT	NA	NA	TT	NA	NA	NA	NA	NA	NA	NA	GG	GG	CC	NA	NA	NA	NA
436	Krskopolje	CC	GG	GA	GG	AC	GG	GG	CC	AA	NA	TT	TT	GG	GG	CC	GA	CT	GG	GG	CC	AA	TT	del--del--	AA	TT	TT	CC	TT	CC	CC	GG	TA	GG	GA	CC	TT	GG	AA	AG
437	Krskopolje	CT	GA	NA	GT	NA	NA	NA	NA	NA	NA	NA	TT	NA	NA	CC	NA	CT	NA	GG	CC	NA	TT	NA	NA	TC	NA	NA	NA	NA	NA	NA	NA	GG	GA	CC	NA	NA	NA	NA
438	Krskopolje	CT	GG	GG	TT	NA	NA	NA	NA	NA	GG	NA	TT	NA	NA	CC	NA	CT	NA	GG	CC	NA	TT	NA	NA	TT	NA	NA	NA	NA	NA	NA	NA	GG	GG	CC	NA	NA	NA	NA
439	Krskopolje	CC	GG	NA	GT	NA	NA	NA	NA	NA	NA	NA	CC	NA	NA	CC	NA	CT	NA	GG	CC	NA	TT	NA	NA	CC	NA	NA	NA	NA	NA	NA	NA	GG	GG	TC	NA	NA	NA	NA
440	Krskopolje	CT	GG	GA	TT	NA	NA	NA	NA	NA	AA	NA	TC	NA	NA	CC	NA	CT	NA	GG	CC	NA	TT	NA	NA	TC	NA	NA	NA	NA	NA	NA	NA	GG	GA	CC	NA	NA	NA	NA
441	Krskopolje	CT	GG	GG	GG	NA	NA	NA	NA	NA	GG	NA	TC	NA	NA	CC	NA	CC	NA	GG	CC	NA	TT	NA	NA	TC	NA	NA	NA	NA	NA	NA	NA	GG	GG	TC	NA	NA	NA	NA
442	Krskopolje	CC	AA	GG	GT	NA	NA	NA	NA	NA	NA	NA	TC	NA	NA	CC	NA	CT	NA	GG	CC	NA	TT	NA	NA	TC	NA	NA	NA	NA	NA	NA	NA	GG	GG	TC	NA	NA	NA	NA
443	Krskopolje	CT	AA	GG	GT	NA	NA	NA	NA	NA	GG	NA	TC	NA	NA	CC	NA	CT	NA	GG	CC	NA	TT	NA	NA	TT	NA	NA	NA	NA	NA	NA	NA	GG	GG	CC	NA	NA	NA	NA
444	Krskopolje	CT	GG	GA	TT	AC	NA	GG	CT	AA	NA	AT	TT	GT	AG	CC	GG	CC	GG	GG	CC	AA	TT	insCCdel--	GA	TC	CT	CC	TT	AC	CC	GA	TA	GG	GG	TC	TT	GG	AA	AA
445	Krskopolje	CT	GG	GG	GT	CC	GA	GG	CT	AA	NA	TT	TT	GG	GG	CC	GA	CT	GG	GG	CC	AA	TT	del--del--	GA	TC	TT	CC	TT	CC	CC	GG	AA	GG	GA	TC	TC	GG	AA	AA
446	Krskopolje	CT	GG	GG	GT	CC	GA	GG	CT	AA	AA	AT	CC	GG	GG	CC	GA	CT	GG	GG	CC	AA	TT	del--del--	GA	TT	CT	CC	TT	AA	AA	GG	TA	GG	GA	CC	TC	GG	AA	AA
447	Krskopolje	TT	AA	GG	GT	CC	GG	GG	TT	AA	NA	TT	TT	GG	AG	CC	GA	CT	GG	GG	CC	AA	TT	del--del--	GA	TC	CT	CC	TT	CC	AA	GG	TT	GG	GG	CC	TT	TT	AA	AA
448	Krskopolje	CC	GG	GG	GT	AC	GG	GG	TT	AA	GA	AT	TC	GG	AA	CC	GG	CC	GG	GG	CC	AA	TT	del--del--	AA	TT	CT	CC	TT	AC	CC	GG	AA	GG	GG	CC	TC	TG	AA	AA
449	Krskopolje	CC	GG	GG	GT	CC	NA	GG	CT	AA	NA	AT	TC	GG	AG	CC	GG	CT	GG	GG	CC	AA	TT	insCCdel--	GA	TT	CT	CC	TT	CC	NA	GG	TA	GG	GG	TC	TC	GG	AA	AA
450	Krskopolje	CC	GG	NA	TT	AC	GG	GG	CT	AA	GG	AT	TT	GG	AA	CC	AA	CC	GG	GG	CC	AA	TT	insCCdel--	AA	CC	CT	CC	TT	CC	CC	AA	AA	GG	GG	TC	TT	TG	AA	AA
451	Krskopolje	CT	GG	NA	GT	CC	NA	GG	CT	AA	GA	TT	TC	GG	GG	CC	GA	TT	GG	GG	CC	AA	TT	insCCdel--	AA	CC	CC	CC	TT	CC	CA	GA	AA	GG	GA	CC	TT	TT	AA	AA
452	Krskopolje	CT	GA	NA	TT	CC	GG	GG	CT	AA	GG	TT	TT	GG	GG	CC	GA	CT	GG	GG	CC	AA	TT	del--del--	GA	TC	TT	CC	TT	AC	CA	GG	AA	GG	GA	TC	TC	GG	AA	AA
453	Krskopolje	CC	GG	NA	TT	CC	GG	GG	TT	AA	NA	AT	TT	GG	AG	CC	GG	CT	GG	GG	CC	AA	TT	del--del--	AA	TC	CT	CG	TT	CC	AA	GA	TA	GG	GG	CC	TT	TG	AA	AA
454	Krskopolje	CT	GG	NA	GT	AC	GG	GG	CT	AA	GG	TT	TC	GG	AG	CC	GA	CT	GG	GG	CC	AA	TT	insCCdel--	GA	TT	CC	CG	TT	CC	CA	GG	TA	GG	GA	CC	TT	GG	AA	AA
455	Krskopolje	TT	AA	GA	TT	CC	GG	GG	TT	AA	NA	AT	CC	GG	AG	CC	GG	CC	GG	GG	CC	AA	TT	del--del--	GA	TT	TT	CC	TT	AC	NA	GG	TA	GG	GG	TC	TT	GG	AA	AA
456	Krskopolje	CT	GG	GG	GG	CC	GG	GG	CC	AA	NA	AA	TC	GG	AG	CC	GG	CT	GG	GG	CC	AA	TT	del--del--	AA	TT	TT	CC	TT	AA	CA	GG	TA	GG	GG	CC	TT	GG	AA	AA
457	Krskopolje	CC	GG	GG	GT	CC	GG	GG	TT	AA	NA	TT	TC	GG	AG	CC	GG	CT	GG	GG	CC	AA	TT	del--del--	GA	TC	TT	CC	TT	AC	AA	GA	AA	GG	GG	CC	TT	GG	AA	AA
458	Krskopolje	CT	GG	GA	TT	AC	GG	GG	CC	AA	NA	AT	TT	GG	AG	CC	GG	CT	GG	GA	CT	GA	TT	del--del--	AA	TC	CT	CC	TT	AC	CA	GG	AA	GG	GG	CC	TC	TG	AA	AG
459	Krskopolje	CT	GG	GG	GT	CC	NA	GG	CT	AA	GA	TT	TT	GG	GG	CC	GG	TT	GG	GG	CC	AA	TT	del--del--	AA	CC	TT	CG	TT	AA	AA	GG	AA	GG	GA	CC	TT	GG	AA	AA
460	Krskopolje	CC	AA	GA	GT	CC	GG	GG	TT	AA	NA	AT	TT	GG	GG	CC	GG	CT	GG	GG	CC	AA	TT	insCCdel--	GA	CC	CT	CC	TT	CC	CA	GG	TA	GG	GG	CC	TT	GG	AA	AA
461	Krskopolje	CC	GG	GG	GT	AC	GG	GG	CC	AA	NA	AT	TT	GG	GG	CC	GG	CT	GG	GG	CC	AA	TT	del--del--	AA	TT	CC	CG	TT	CC	CC	GG	TA	GG	GA	CC	TT	TG	AA	AA
462	Krskopolje	CT	GA	GA	GT	CC	GG	GG	TT	AA	GA	AT	TT	GG	AG	CT	GA	CC	GG	GG	CC	AA	TT	del--del--	AA	TT	CT	CC	TT	AC	AA	GG	AA	GG	GG	CC	TT	GG	AA	AG
463	Krskopolje	TT	GG	GG	GT	CC	GG	GG	CT	AA	NA	AA	TT	GG	AG	CC	GA	CT	GG	GG	CC	AA	TT	del--del--	GA	TT	CT	CC	TT	AA	CC	GG	TA	GG	GG	CC	TT	TG	AA	AA
464	Krskopolje	CT	AA	GG	GG	CC	GG	GT	CT	AA	GA	AT	TT	GG	AA	CC	GA	CC	GG	GG	CC	AA	TT	del--del--	GA	TT	TT	CG	NA	CC	CC	GG	TA	GG	GA	CC	TT	TG	AA	AA
465	Krskopolje	CT	GG	GG	GT	CC	GG	GG	CT	AA	GA	AT	TC	GG	GG	CC	GG	CT	GG	GG	CC	AA	TT	insCCdel--	GA	CC	CT	CG	TT	CC	NA	GG	TT	GG	GA	CC	TT	TG	AA	AA
466	Krskopolje	CT	GG	NA	GT	CC	GA	GG	CT	AA	GG	TT	TC	GT	AG	CC	GG	CT	GG	GG	CC	AA	TT	del--del--	GA	CC	TT	CG	TT	AA	CA	GG	TA	GG	GA	TC	TC	GG	AA	AA
467	Krskopolje	CC	GG	GA	GT	CC	GG	GG	TT	AA	NA	AT	TC	GG	AG	CC	GG	CC	GG	GG	CC	AA	TT	insCCdel--	GA	CC	TT	CC	TT	CC	NA	GA	TT	GG	GA	TC	TT	GG	AA	AA
468	Krskopolje	NA	NA	NA	NA	NA	NA	NA	NA	NA	NA	NA	NA	NA	NA	NA	NA	NA	NA	NA	NA	NA	NA	NA	NA	NA	NA	NA	NA	NA	NA	NA	NA	NA	NA	NA	NA	NA	NA	NA
469	Krskopolje	TT	GG	GG	TT	CC	GA	GG	CT	AA	GA	TT	TC	GG	AA	CC	GG	TT	GG	GG	CC	AA	TT	insCCdel--	GA	TC	CT	CG	TT	CC	NA	GG	TA	GG	GG	CC	TC	GG	AA	AA
470	Krskopolje	CC	GG	AA	GG	AC	GG	GG	CC	AA	NA	AT	TC	GT	AG	CC	GA	CT	GG	GG	CC	AA	TT	del--del--	GA	CC	TT	CC	TT	AC	AA	GG	TA	GG	GA	CC	TT	GG	AA	AA
471	Krskopolje	CT	GG	GG	GG	CC	GG	GG	CT	AA	NA	TT	TT	GG	GG	CC	GG	CT	GG	GG	CC	AA	TT	del--del--	AA	TT	CC	CG	TT	AC	CC	GG	AA	GG	GG	CC	TT	TG	AA	AA
472	Krskopolje	CT	GG	NA	GT	AC	GG	GG	CC	AA	GG	AT	TT	GG	GG	CC	GA	CT	GG	GG	CC	AA	TT	del--del--	GA	TC	CT	CG	TT	AC	NA	GG	TA	GG	GA	TC	TT	GG	AA	AA
473	Krskopolje	CC	GG	GG	GT	NA	NA	NA	NA	NA	GA	NA	TT	NA	NA	CC	NA	CT	NA	GG	CC	NA	TT	NA	NA	TC	NA	NA	NA	NA	NA	NA	NA	GG	GG	NA	NA	NA	NA	NA
474	Krskopolje	CT	GA	GG	TT	AC	GA	GG	CT	AA	NA	TT	TT	GG	AG	CC	NA	CT	GG	GG	CC	AA	TT	insCCdel--	GA	TC	TT	CC	TT	AC	CC	GA	TA	GG	GA	TC	TT	TG	AA	AA
475	Krskopolje	TT	AA	GA	GG	AA	GG	GG	TT	AA	NA	AT	TT	GG	AG	CC	GG	CC	GG	GG	CC	AA	TT	del--del--	GG	TT	CT	CC	TT	CC	CC	GG	AA	GG	GG	TT	TC	GG	AA	AA
476	Krskopolje	CT	GA	GA	TT	NA	NA	NA	NA	NA	NA	NA	TT	NA	NA	CC	NA	CT	NA	GG	CC	NA	TT	NA	NA	CC	NA	NA	NA	NA	NA	NA	NA	GG	GA	CC	NA	NA	NA	NA
477	Lithuanian Indigenous Wattle	CT	AA	GA	GT	CC	NA	GG	CT	AA	GG	TT	CC	GG	AA	CC	GG	CT	GG	GG	CC	AA	TT	insCCinsCC	GA	TT	CT	CG	TT	AA	CC	GG	AA	GG	GG	CC	TT	GG	AA	AA
478	Lithuanian Indigenous Wattle	CC	AA	GA	GG	CC	NA	GG	CC	AA	GA	TT	CC	GG	AG	CT	GG	CC	GG	GG	CC	AA	TT	insCCinsCC	AA	TT	CT	CC	TT	AC	CC	GG	AA	GG	GG	CC	TC	GG	AA	AA
479	Lithuanian Indigenous Wattle	CC	AA	GG	GG	CC	NA	GT	CC	AA	AA	TT	CC	GG	AA	CC	GG	CC	GG	GG	CC	AA	TT	insCCinsCC	GA	TT	CT	CG	TT	AA	CC	GG	AA	GG	GA	CC	TT	GG	AA	AA
480	Lithuanian Indigenous Wattle	CC	AA	GG	GG	CC	NA	GG	CT	AA	NA	TT	CC	GG	GG	CC	GG	CC	GG	GG	CC	AA	TT	insCCinsCC	GA	TT	TT	CG	TT	AA	CC	GG	AA	GG	GA	CC	TT	TG	AA	AA
481	Lithuanian Indigenous Wattle	CC	AA	GA	GG	CC	GG	GG	CT	AA	GG	TT	CC	GG	GG	CC	GG	CC	GG	GG	CC	AA	TT	insCCinsCC	GA	TC	TT	CG	TT	AC	NA	GG	AA	GG	GG	CC	TC	GG	AA	AA
482	Lithuanian Indigenous Wattle	CC	AA	GG	GG	AC	GG	GT	CT	AA	GG	AT	TC	GG	GG	CC	GG	CC	GG	GG	CC	AA	TT	insCCinsCC	GG	CC	TT	CG	TT	CC	CC	GG	AA	GG	GG	CC	TT	GG	AA	AA
483	Lithuanian Indigenous Wattle	CT	GA	GG	GG	AA	NA	GG	CC	AA	GA	AA	CC	GT	AG	CC	GG	CC	GG	GG	CC	AA	TT	insCCinsCC	GG	TT	CC	CG	TT	AA	NA	GG	TA	GG	GG	CC	TC	GG	AA	AA
484	Lithuanian Indigenous Wattle	CC	AA	GG	GG	AA	GA	GT	CC	AA	GA	AT	CC	GG	GG	CC	GG	CC	GG	GG	CC	AA	TT	insCCinsCC	GA	TC	CT	CC	TT	AA	NA	GG	AA	GG	GG	CC	TC	GG	AA	AA
485	Lithuanian Indigenous Wattle	CC	AA	GG	GG	AC	GG	GG	CT	AA	NA	TT	CC	GG	GG	CC	GG	CC	GG	GG	CC	AA	TT	insCCinsCC	AA	TC	CT	CC	TT	AA	CC	GG	AA	GG	GG	CC	TT	GG	AA	AA
486	Lithuanian Indigenous Wattle	CC	AA	GG	GG	AC	GG	GT	CT	AA	NA	TT	CC	GG	AG	CC	GG	CC	GG	GG	CC	AA	TT	insCCinsCC	GA	TC	CT	CC	TT	AC	NA	GG	TA	GG	GG	CC	TC	TG	AA	AA
487	Lithuanian Indigenous Wattle	CC	GA	GG	GG	AA	GG	GG	CT	AA	GG	AT	TC	GG	AG	CC	GG	CC	GG	GG	CC	AA	TT	insCCinsCC	AA	TT	TT	CC	TT	AC	CC	GG	TT	GG	GG	CC	TT	GG	AA	AA
488	Lithuanian Indigenous Wattle	CC	AA	GA	GG	AC	GG	GG	CC	AA	NA	AT	TC	GG	GG	CC	GG	CC	GG	GG	CC	AA	TT	insCCinsCC	GA	TC	TT	CC	TT	AC	CC	GG	AA	GG	GG	CC	TC	GG	AA	AA
489	Lithuanian Indigenous Wattle	CT	GA	GG	GT	AC	GG	GG	CC	AA	GA	AT	CC	TT	GG	CC	GG	CC	GG	GG	CC	AA	TT	insCCinsCC	GA	TT	CT	CC	TT	CC	NA	GG	AA	GG	GG	CC	TT	GG	AA	AA
490	Lithuanian Indigenous Wattle	CC	AA	GG	GT	AC	GG	GG	CT	AA	NA	AT	CC	GG	AG	CC	GG	CC	GG	GG	CC	AA	TT	insCCinsCC	GA	TC	CT	CG	TT	AC	NA	GG	AA	GG	GG	CC	TC	GG	AA	AA
491	Lithuanian Indigenous Wattle	CC	AA	GG	GG	AC	GA	GG	CT	AA	NA	AT	TC	GG	AG	CC	GG	TT	GG	GG	CC	AA	TT	insCCinsCC	GA	TC	TT	CG	TT	AC	CC	NA	AA	GG	GG	CC	TC	GG	AA	AA
492	Lithuanian Indigenous Wattle	CC	AA	GG	GG	CC	GG	GG	CC	AA	NA	TT	CC	GG	AG	CC	GG	TT	GG	GG	CC	AA	TT	insCCinsCC	GA	TT	CT	GG	TT	AA	CC	GG	AA	GG	GA	CC	TT	GG	AA	AA
493	Lithuanian Indigenous Wattle	CT	AA	GA	GG	AC	AA	GG	CC	AA	NA	TT	TC	GG	AG	CC	GG	CC	GG	GG	CC	AA	TT	insCCinsCC	AA	TT	CT	CG	TT	AC	CC	GG	AA	GG	GA	CC	TT	TG	AA	AA
494	Lithuanian Indigenous Wattle	CT	AA	GA	GT	CC	AA	GG	CC	AA	GA	TT	CC	GG	AG	CC	GG	CT	GG	GG	CC	AA	TT	insCCinsCC	GA	TT	TT	CG	TT	AA	CC	GG	AA	GG	GG	CC	TT	TG	AA	AA
495	Lithuanian Indigenous Wattle	CC	AA	GG	GG	AC	GA	GT	CC	AA	AA	AA	CC	GG	GG	CC	GG	CC	GG	GG	CC	AA	TT	insCCinsCC	GA	TT	TT	CG	TT	AA	NA	GG	AA	GG	GG	CC	TT	GG	AA	AA
496	Lithuanian Indigenous Wattle	CC	AA	GG	GT	AC	GG	GG	CC	AA	NA	AT	CC	GG	AG	CC	GG	CC	GG	GG	CC	AA	TT	insCCinsCC	GA	TT	TT	CG	TT	AC	CC	GG	TA	GG	GG	CC	TC	GG	AA	AA
497	Lithuanian Indigenous Wattle	CC	AA	GG	GG	AC	GA	GG	CT	AA	GA	AT	CC	GG	AG	CC	GG	CC	GG	GG	CC	AA	TT	insCCinsCC	AA	TT	TT	CG	TT	AC	CC	GG	AA	GG	GG	CC	TC	GG	AA	AA
498	Lithuanian Indigenous Wattle	CC	GA	GG	GT	AC	GG	GT	CT	AA	AA	AT	CC	GT	AG	CC	GG	TT	GG	GG	CC	AA	TT	insCCinsCC	GG	TC	CT	CG	TT	AC	CC	GG	TA	GG	GG	CC	TC	GG	AA	AA
499	Lithuanian Indigenous Wattle	CT	GA	GG	GG	AC	GG	GG	CT	AA	GA	AT	CC	GT	AG	CC	GG	CC	GG	GG	CC	AA	TT	insCCinsCC	GA	TT	CT	GG	TT	AC	AA	GG	TA	GG	GG	CC	TT	GG	AA	AA
500	Lithuanian Indigenous Wattle	CT	GA	GG	GG	AC	GG	GG	CC	AA	GA	AT	CC	GT	AG	CC	GG	CC	GG	GG	CC	AA	TT	insCCinsCC	GA	TT	CC	CC	TT	AC	NA	GG	TA	GG	GG	CC	TC	GG	AA	AA
501	Lithuanian Indigenous Wattle	CT	AA	GG	GT	AC	GG	GT	CT	AA	GA	TT	TC	GT	AG	CC	GG	CC	GG	GG	CC	AA	TT	insCCinsCC	GG	CC	CT	GG	TT	CC	NA	GG	AA	GG	GG	CC	TC	GG	AA	AA
502	Lithuanian Indigenous Wattle	CC	AA	GG	GG	CC	GG	GT	CT	AA	AA	TT	CC	GG	AA	CC	GG	TT	GG	GG	CC	AA	TT	insCCinsCC	GA	CC	TT	CG	TT	AC	CC	GG	TA	GG	GA	CC	CC	TG	AA	AA
503	Lithuanian Indigenous Wattle	CT	GA	GG	TT	AC	NA	GG	CT	AA	NA	AT	CC	TT	AG	CC	GG	CC	GG	GG	CC	AA	TT	insCCinsCC	GA	TT	CT	CG	TT	AC	NA	GG	AA	GG	GG	CC	TT	GG	AA	AA
504	Lithuanian Indigenous Wattle	CC	GA	GG	GG	CC	GA	GT	CT	AA	NA	TT	CC	GG	GG	CC	GG	CC	GG	GG	CC	AA	TT	insCCinsCC	GA	CC	TT	CG	TT	AC	CC	GG	AA	GG	GG	CC	TT	GG	AA	AA
505	Lithuanian Indigenous Wattle	CC	AA	GA	GG	AC	GA	GG	CT	AA	NA	AT	CC	NA	GG	CC	GG	CC	GG	GG	CC	AA	TT	insCCinsCC	AA	TC	CT	CC	TT	AA	CC	GG	AA	GG	GG	CC	TT	GG	AA	AA
506	Lithuanian Indigenous Wattle	CC	AA	GG	GT	AA	GG	GG	CC	AA	GA	AT	CC	GG	AG	CC	GG	CC	GG	GG	CC	AA	TT	insCCinsCC	AA	TC	CC	CC	TT	AA	NA	GG	AA	GG	GG	CC	TC	GG	AA	AA
507	Lithuanian Indigenous Wattle	CT	GA	GG	GT	AC	GG	GT	TT	AA	GA	TT	CC	GG	GG	CC	GG	TT	GG	GG	CC	AA	TT	insCCinsCC	GA	TT	TT	GG	TT	AC	CC	GG	AA	GG	GG	CC	TT	GG	AA	AA
508	Lithuanian Indigenous Wattle	CT	AA	GG	GT	CC	GA	GT	CC	AA	NA	AT	CC	GG	GG	CC	GG	CC	GG	GG	CC	AA	TT	insCCinsCC	GG	TT	CT	CG	TT	CC	CC	GG	AA	GG	GG	CC	TT	GG	AA	AA
509	Lithuanian Indigenous Wattle	CT	AA	GA	GT	AC	GA	GT	CC	AA	GA	AT	CC	GG	GG	CC	GG	CC	GG	GG	CC	AA	TT	insCCinsCC	GA	TC	CC	CC	TT	CC	CC	GG	AA	GG	GG	CC	TC	GG	AA	AA
510	Lithuanian Indigenous Wattle	CC	AA	GG	GT	AC	GG	GG	CT	AA	GA	AT	CC	GG	AG	CC	GG	CC	GG	GG	CC	AA	TT	insCCinsCC	AA	TT	TT	CG	TT	AA	CC	GG	AA	GG	GG	CC	TC	GG	AA	AA
511	Lithuanian Indigenous Wattle	CT	AA	GA	GT	CC	AA	GG	CC	AA	GA	TT	CC	GG	GG	CT	GG	CT	GG	GG	CC	AA	TT	insCCinsCC	AA	TT	TT	CG	TT	AC	CC	GG	AA	GG	GG	CC	TT	TG	AA	AA
512	Lithuanian Indigenous Wattle	CT	GA	GG	GG	AC	GG	GG	CC	AA	GG	TT	CC	GG	GG	CC	GG	CT	GG	GG	CC	AA	TT	insCCinsCC	GG	TC	CT	GG	TC	CC	AA	GA	TA	GG	GG	CC	TC	GG	AA	AA
513	Lithuanian Indigenous Wattle	CC	AA	GG	GG	AA	GA	TT	CT	AA	NA	AT	TC	GG	GG	CC	GG	CC	GG	GG	CC	AA	TT	insCCinsCC	GG	CC	TT	CG	TT	AC	CC	GG	AA	GG	GG	CC	TT	GG	AA	AA
514	Lithuanian Indigenous Wattle	CC	AA	GG	GG	CC	GA	GG	CC	AA	GA	TT	CC	GG	GG	CC	GG	CC	GG	GG	CC	AA	TT	insCCinsCC	GA	TT	TT	CG	TT	AC	CC	GG	AA	GG	GG	CC	TC	GG	AA	AA
515	Lithuanian Indigenous Wattle	CC	AA	GA	GG	CC	GA	GG	TT	AA	GA	TT	CC	GG	GG	CC	GG	CC	GG	GG	CC	AA	TT	insCCinsCC	AA	TT	TT	CC	TT	CC	CC	GG	AA	GG	GG	CC	TT	GG	AA	AA
516	Lithuanian Indigenous Wattle	CC	AA	GA	GT	AC	GG	GG	TT	AA	NA	TT	TC	GG	GG	CC	GG	CC	GG	GG	CC	AA	TT	insCCinsCC	GA	TT	TT	CG	TT	AA	CC	GG	TA	GG	GG	CC	TC	NA	AA	AA
517	Lithuanian Indigenous Wattle	CT	AA	GG	GG	CC	NA	GG	CC	AA	NA	AT	CC	GT	AG	CC	GG	CC	GG	GG	CC	AA	TT	insCCinsCC	GG	TT	CT	GG	TT	AC	CC	GG	AA	GG	GG	CC	TT	GG	AA	AA
518	Lithuanian Indigenous Wattle	CC	GA	GA	GT	CC	NA	GG	CT	AA	NA	TT	CC	GG	GG	CC	GG	CC	GG	GG	CC	AA	TT	insCCinsCC	AA	TT	TT	CC	TT	AC	CC	GG	TA	GG	GG	CC	TT	GG	AA	AA
519	Lithuanian Indigenous Wattle	CC	GA	GG	GG	AC	GA	GG	CT	AA	GA	TT	CC	GG	GG	CC	GG	CC	GG	GG	CC	AA	TT	insCCinsCC	AA	TC	CT	CC	TT	AC	CC	GG	TA	GG	GA	CC	TC	TG	AA	AA
520	Lithuanian Indigenous Wattle	TT	GA	GA	GG	AC	GG	GG	CC	AA	GA	AT	CC	GT	AG	CC	GG	CC	GG	GG	CC	AA	TT	insCCinsCC	GA	TT	CC	CC	TT	AC	CC	GG	AA	GG	GG	CC	TC	GG	AA	AA
521	Lithuanian Indigenous Wattle	CT	AA	GG	GG	CC	NA	GG	CC	AA	GA	TT	CC	GG	GG	CC	GG	CC	GG	GG	CC	AA	TT	insCCinsCC	AA	TT	CT	CG	TT	AA	CC	GG	AA	GG	GG	CC	TC	TG	AA	AA
522	Lithuanian Indigenous Wattle	CC	AA	GG	GT	AC	GA	TT	TT	AA	NA	TT	TC	GG	GG	CC	GG	CC	GG	GG	CC	AA	TT	insCCinsCC	GG	TC	TT	CG	TT	CC	CC	GG	AA	GG	GG	CC	TC	GG	AA	AA
523	Lithuanian Indigenous Wattle	TT	GA	GA	GT	CC	NA	GG	CC	AA	NA	TT	CC	GT	AG	CC	GG	TT	GG	GG	CC	AA	TT	insCCinsCC	GA	TT	CC	CG	TT	AA	CC	GG	AA	GG	GG	CC	TT	GG	AA	AA
524	Lithuanian Indigenous Wattle	CC	AA	GG	GG	CC	NA	GG	CC	AA	AA	TT	CC	GG	GG	CT	GG	CT	GG	GG	CC	AA	TT	insCCinsCC	GA	TT	TT	CG	TT	AC	CC	GG	AA	GG	GA	CC	TT	GG	AA	AA
525	Lithuanian White Old Type	CC	GG	GG	TT	AC	GG	GG	CC	AA	GA	TT	CC	GT	AG	CC	GG	TT	GG	GG	CC	AA	TT	insCCinsCC	AA	TC	CT	CG	TT	CC	NA	GA	TT	GG	AA	CC	TC	GG	AA	AA
526	Lithuanian White Old Type	CT	GG	GG	GT	AA	NA	GG	CC	AA	NA	TT	TC	TT	GG	CC	GG	CT	GG	GA	CT	GA	TT	insCCdel--	GA	TC	TT	CG	TT	AC	AA	GG	TA	GG	AA	CC	TT	GG	AA	AA
527	Lithuanian White Old Type	CT	GG	GA	GT	AA	GG	GT	CC	AA	GA	TT	CC	GT	GG	CC	GG	TT	GG	GG	CC	AA	TT	insCCinsCC	GG	TC	CT	CG	TT	CC	AA	GG	TT	GG	GA	CC	CC	GG	AA	AA
528	Lithuanian White Old Type	CC	GG	GG	TT	CC	AA	GG	CT	AA	GA	TT	CC	GT	GG	CC	GG	CC	GG	GG	CC	AA	TT	insCCinsCC	AA	TC	TT	CG	TT	CC	CC	GA	TT	GG	AA	CC	TT	GG	AA	AA
529	Lithuanian White Old Type	CC	GA	GG	GT	AC	GA	GT	CC	AA	GA	TT	TC	GT	GG	CC	GA	CC	GG	GG	CC	AA	TT	insCCinsCC	GA	TC	TT	CC	TT	AC	NA	GG	TA	GG	GG	TC	TC	GG	AA	AA
530	Lithuanian White Old Type	CT	GG	GG	TT	AC	GG	GG	CC	AA	NA	AT	CC	GT	GG	CC	GA	CT	GG	GG	CC	AA	NA	insCCinsCC	AA	TC	CC	CC	TC	CC	AA	GA	AA	GG	GA	CC	CC	GG	AA	AA
531	Lithuanian White Old Type	CC	GG	GG	TT	AA	AA	GG	CC	AA	NA	TT	TT	TT	GG	CC	GA	TT	GG	GA	CT	GA	TT	insCCdel--	AA	CC	CT	CG	TC	AC	AA	GG	TA	GG	GA	CC	TC	GG	AA	AA
532	Lithuanian White Old Type	CC	GG	GG	GT	AC	GA	GG	CC	AA	GA	TT	CC	NA	AG	CC	GG	CT	GG	GG	CC	AA	TT	insCCinsCC	AA	TC	CT	CC	TT	CC	CC	GG	TT	GG	AA	CC	TC	NA	AA	AA
533	Lithuanian White Old Type	CC	GG	GG	GG	AC	AA	TT	CT	AA	GA	TT	CC	GT	GG	CC	GG	CC	GG	GG	CC	AA	TT	insCCinsCC	GG	TC	TT	CG	TC	AC	CA	GA	TT	GG	GG	CC	TT	GG	AA	AA
534	Lithuanian White Old Type	CC	GA	GG	GG	AA	GA	GG	CC	AA	NA	TT	CC	TT	GG	CC	GG	TT	GG	GG	CC	AA	TT	insCCinsCC	GA	TC	TT	GG	CC	CC	AA	NA	TT	GG	GG	CC	TC	GG	AA	AA
535	Lithuanian White Old Type	CC	GG	GG	GG	AA	GA	GG	CC	AA	GA	TT	CC	GG	GG	CC	GG	TT	GG	GG	CC	AA	TT	insCCinsCC	GA	CC	CT	GG	CC	CC	AA	GA	TT	GG	GG	CC	TC	GG	AA	AA
536	Lithuanian White Old Type	CC	GG	GG	GT	AC	GA	GT	CT	AA	GA	TT	CC	TT	GG	CC	GG	TT	GG	GG	CC	AA	TT	insCCinsCC	GA	CC	CC	GG	CC	AA	NA	GG	TA	GG	GG	CC	TC	GG	AA	AA
537	Lithuanian White Old Type	CC	GA	GG	GT	AC	GA	GG	CC	AA	GA	TT	TC	TT	GG	CC	GG	CC	GG	GG	CC	AA	TT	insCCinsCC	GA	TT	CT	CG	TC	CC	CC	GG	AA	GG	GA	TC	TT	GG	AA	AA
538	Lithuanian White Old Type	CC	AA	NA	GT	AA	AA	GG	CC	AA	GG	TT	TC	GT	GG	CC	GG	CC	GG	GA	CT	GA	TT	insCCdel--	GA	TC	TT	GG	TC	CC	CA	GA	TT	GG	GG	TC	TT	GG	AA	AA
539	Lithuanian White Old Type	CC	GG	GG	TT	AC	GG	GT	CC	AA	GA	TT	CC	GT	GG	CC	GA	CT	GG	GG	CC	AA	TT	insCCinsCC	GA	CC	CC	CC	TT	AC	NA	GG	TA	GG	GA	CC	CC	GG	AA	AA
540	Lithuanian White Old Type	CC	GG	GG	GG	AA	GA	GG	CC	AA	NA	TT	TT	GT	GG	CC	GG	TT	GG	GG	CC	AA	TT	insCCinsCC	AA	TC	CT	CG	TC	CC	NA	GA	TA	GG	GA	TC	TC	GG	AA	AA
541	Lithuanian White Old Type	CC	GG	GG	GT	AC	GA	GG	CC	AA	NA	TT	TC	TT	GG	CC	GA	CT	GG	GA	CT	GA	TT	insCCdel--	GG	TT	TT	GG	TT	AC	AA	GG	AA	GG	GA	CC	TC	GG	AA	AA
542	Lithuanian White Old Type	CC	GG	GG	GG	AA	GA	GT	CC	AA	NA	TT	TC	GT	GG	CC	GA	TT	GG	GA	CT	GA	TT	insCCdel--	GA	TC	CT	GG	TT	AC	NA	GG	AA	GG	AA	TC	TT	GG	AA	AA
543	Lithuanian White Old Type	CC	GA	GG	GT	AA	GA	GG	CC	AA	GA	TT	CC	GT	GG	CC	GA	CT	GG	GA	CT	GA	TT	insCCdel--	GA	CC	CT	CG	TC	CC	AA	GG	TA	GG	GG	CC	TC	GG	AA	AA
544	Lithuanian White Old Type	CC	GA	GG	GG	AA	GA	GG	CC	AA	GA	TT	CC	GT	GG	CC	GG	CT	GG	GA	CT	GA	TT	insCCdel--	GA	CC	TT	GG	TC	CC	CC	GG	TA	GG	GA	CC	TT	GG	AA	AA
545	Lithuanian White Old Type	CC	GG	GG	GT	AC	GG	GT	CC	AA	GG	TT	TC	GT	GG	CC	GA	CT	GG	GG	CC	AA	TT	insCCinsCC	GG	TC	CT	GG	TC	AC	CC	GG	AA	GG	GA	TC	TC	GG	AA	AA
546	Lithuanian White Old Type	CC	GG	GG	TT	AA	AA	GG	CC	AA	NA	TT	TC	TT	GG	CC	GA	CC	GG	GG	CC	AA	TT	insCCinsCC	AA	CC	CT	CG	CC	CC	CC	GG	TA	GG	GA	CC	TT	GG	AA	AA
547	Lithuanian White Old Type	CC	GG	GG	TT	AA	NA	GG	CC	AA	NA	TT	TC	TT	GG	CC	GG	CT	GG	GG	CC	AA	TT	insCCinsCC	AA	CC	CT	GG	TC	AA	AA	GG	TA	GG	AA	CC	TC	GG	AA	AA
548	Lithuanian White Old Type	CC	GG	GA	GT	AA	NA	GT	CC	AA	NA	TT	TC	GT	GG	CC	GG	TT	GG	GG	CC	AA	TT	insCCinsCC	GA	TC	CC	CG	TC	CC	AA	GG	TA	GG	GG	CC	TC	GG	AA	AA
549	Lithuanian White Old Type	CC	GG	GG	GT	AA	AA	GT	CT	AA	GA	TT	CC	GT	GG	CC	GG	TT	GG	GG	CC	AA	TT	insCCinsCC	GA	TC	CC	CC	TC	CC	AA	GG	TA	GG	AA	CC	TT	GG	AA	AA
550	Lithuanian White Old Type	CC	GA	GG	GT	AC	GA	GG	CC	AA	GA	TT	TC	TT	GG	CC	GG	CC	GG	GG	CC	AA	TT	insCCinsCC	GA	TT	CT	CG	TC	CC	CC	GG	AA	GG	GA	TC	TT	GG	AA	AA
551	Lithuanian White Old Type	CC	GG	GG	GT	AC	GA	GG	CT	AA	GA	TT	CC	GT	NA	CC	GG	TT	GG	GG	CC	AA	TT	insCCinsCC	AA	TC	CT	CC	TT	CC	NA	GG	TA	GG	AA	CC	TT	GG	AA	AA
552	Lithuanian White Old Type	CC	GG	GG	TT	AA	GA	GT	CT	AA	GA	TT	TC	GT	GG	CC	GG	CC	GG	GG	CC	AA	TT	insCCinsCC	GA	CC	CT	CG	TC	CC	NA	GG	TA	GG	GA	CC	TC	GG	AA	AA
553	Lithuanian White Old Type	CC	GG	GG	TT	AC	GA	GT	CT	AA	NA	TT	CC	GG	AG	CC	GG	TT	GG	GG	CC	AA	TT	insCCinsCC	GA	TC	CC	CG	TT	CC	NA	GG	TA	GG	AA	CC	TT	GG	AA	AA
554	Lithuanian White Old Type	CC	GG	GG	GG	AA	NA	GT	CT	AA	GA	TT	TC	GT	GG	CC	GG	CC	GG	GA	CT	GA	TT	NA	GG	TC	TT	CG	TT	AC	CA	NA	TT	GG	GA	CC	TT	GG	AA	AA
555	Lithuanian White Old Type	CC	GG	GG	GT	AA	GG	GG	CC	AA	NA	TT	TT	GT	GG	CC	GA	CT	GG	GA	CT	GA	TT	insCCdel--	GG	TC	TT	GG	TT	AC	CC	GG	AA	GG	GA	TC	TC	GG	AA	AA
556	Lithuanian White Old Type	CC	GG	GG	GT	AA	AA	GG	CT	AA	GA	TT	TC	GT	GG	CC	GA	TT	GG	GG	CC	AA	TT	insCCinsCC	AA	CC	CT	CG	TT	CC	AA	GG	AA	GG	GA	CC	TT	GG	AA	AA
557	Lithuanian White Old Type	CC	GG	GG	TT	AC	AA	GG	CC	AA	GA	TT	TC	TT	GG	CC	GG	TT	GG	GA	CT	GA	TT	insCCdel--	AA	TC	CT	GG	TC	CC	AA	GG	TA	GG	GA	CC	TT	GG	AA	AA
558	Lithuanian White Old Type	CC	GG	GG	TT	AC	GA	GG	CC	AA	AA	TT	CC	GG	GG	CC	GA	CC	GG	GG	CC	AA	TT	insCCinsCC	AA	CC	CC	CC	TT	CC	AA	GG	TA	GG	AA	CC	CC	GG	AA	AA
559	Lithuanian White Old Type	CC	GG	GG	TT	AC	GA	GT	CC	AA	AA	TT	CC	TT	GG	CC	GG	TT	GG	GG	CC	AA	TT	insCCinsCC	GG	CC	CT	CG	TC	AC	NA	GA	TA	GG	GG	CC	TC	GG	AA	AA
560	Lithuanian White Old Type	CC	GG	NA	TT	CC	AA	GG	CT	AA	GG	TT	CC	GT	GG	CC	GG	CC	GG	GG	CC	AA	TT	insCCinsCC	AA	TC	TT	CG	TT	CC	CC	GA	TT	GG	AA	CC	TT	GG	AA	AA
561	Lithuanian White Old Type	CC	GG	GG	GT	AC	AA	GG	CC	AA	GG	AT	CC	GG	GG	CC	GA	CT	GG	GG	CC	AA	TT	insCCinsCC	AA	CC	CT	CG	TC	CC	CC	GG	TT	GG	GA	CC	TC	GG	AA	AA
562	Lithuanian White Old Type	CC	GG	GG	GT	AC	GA	GG	CC	AA	NA	AT	CC	GG	AG	CC	GG	CC	GG	GG	CC	AA	TT	insCCinsCC	AA	CC	CT	CG	TC	CC	NA	GA	TT	GG	GA	CC	TC	GG	AA	AA
563	Lithuanian White Old Type	CC	GG	GG	GG	AA	GG	GG	CT	AA	GA	TT	TC	GG	GG	CC	GG	CC	GG	GG	CC	AA	TT	insCCinsCC	GA	TC	TT	CG	TC	CC	AA	GA	TT	GG	GG	CC	TC	GG	AA	AA
564	Lithuanian White Old Type	CC	GA	GG	GG	AA	AA	GG	CT	AA	NA	TT	CC	TT	GG	CC	GG	TT	GG	GG	CC	AA	TT	insCCinsCC	GA	CC	TT	CG	CC	CC	AA	GA	TA	GG	GA	CC	TT	GG	AA	AA
565	Lithuanian White Old Type	CC	GG	GG	GT	AA	AA	GT	CC	AA	GA	TT	TC	TT	AG	CC	GG	CT	GG	GG	CC	AA	NA	insCCinsCC	GA	TC	TT	GG	TC	CC	CC	GG	TT	GG	GA	TC	CC	GG	AA	AA
566	Lithuanian White Old Type	CC	GG	GG	TT	AC	GG	GG	CT	AA	NA	TT	TC	GT	GG	CC	GG	TT	GG	GG	CC	AA	TT	insCCinsCC	AA	TC	TT	GG	TC	CC	NA	GG	TT	GG	GA	CC	TC	GG	AA	AA
567	Lithuanian White Old Type	CC	GG	GG	GG	AA	GA	GG	CC	AA	GA	TT	CC	GT	GG	CC	GG	TT	GG	GG	CC	AA	TT	insCCinsCC	AA	TC	CC	CC	TT	CC	CC	GG	TA	GG	GA	CC	TT	GG	AA	AA
568	Lithuanian White Old Type	CC	GG	GG	GG	AA	GA	GT	CC	AA	GA	TT	CC	TT	AG	CC	GG	TT	GG	GA	CT	GA	TT	insCCdel--	GA	CC	CT	CG	TC	CC	CC	GG	AA	GG	GG	CC	TC	GG	AA	AA
569	Lithuanian White Old Type	CC	AA	GG	GG	AC	AA	TT	CC	AA	GA	TT	CC	GT	AG	CC	GG	TT	GG	GA	CT	GA	TT	insCCdel--	GG	TC	TT	CC	TC	CC	CC	AA	TA	GG	GA	CC	TC	GG	AA	AA
570	Lithuanian White Old Type	CC	GG	GG	GT	AC	GA	GG	CC	AA	AA	AT	CC	GT	AG	CC	GA	CT	GG	GG	CC	AA	TT	insCCinsCC	AA	CC	CT	CG	TC	CC	CA	GA	TA	GG	GA	CC	TT	GG	AA	AA
571	Lithuanian White Old Type	CC	GA	GG	GG	AC	GG	GG	CT	AA	NA	TT	CC	GG	GG	CC	GG	TT	GG	GG	CC	AA	TT	insCCinsCC	AA	TC	CT	CG	TC	CC	AA	GG	TT	GG	GG	CC	CC	TG	AA	AA
572	Lithuanian White Old Type	CC	AA	GG	GG	AA	GA	GG	CT	AA	GA	TT	CC	GT	AG	CC	GG	TT	GG	GA	CT	GA	TT	insCCdel--	AA	CC	TT	CC	CC	CC	AA	AA	TA	GG	AA	CC	TC	GG	AA	AA
573	Majorcan Black	CT	GG	GG	GT	AA	GA	GG	CC	AA	GA	TT	CC	GG	GG	CC	GA	CT	GG	GG	CC	AA	TT	del--del--	GA	TT	CT	CC	TT	AC	NA	GG	TA	GG	GA	CC	TT	TG	AA	AA
574	Majorcan Black	TT	GA	GG	TT	AC	GG	TT	CC	AA	AA	AT	TC	GG	GG	CC	AA	CC	GG	GG	CC	AA	TT	del--del--	GG	TT	CT	CC	TT	AA	NA	GG	AA	GG	AA	CC	TT	GG	AA	AA
575	Majorcan Black	CC	GG	GG	GT	AA	GA	GG	CC	AA	AA	AT	CC	GG	GG	CC	AA	TT	GG	GG	CC	AA	TT	del--del--	GG	TC	TT	CG	TT	AA	CC	GG	TA	GG	GA	CC	TT	TG	AA	AA
576	Majorcan Black	TT	GG	GG	TT	AC	GG	GT	CT	AA	GA	TT	TC	GT	GG	CC	GA	TT	GG	GG	CC	AA	TT	del--del--	GG	TT	CC	CC	TT	AA	NA	GG	TA	GG	GA	CC	TC	TT	AA	AA
577	Majorcan Black	CT	GG	GG	TT	AA	GG	GG	CC	AA	GA	TT	TC	GG	GG	CC	GA	TT	GG	GG	CC	AA	TT	del--del--	GG	TT	CC	CC	TC	AA	CC	GG	TA	GG	GA	CC	TC	GG	AA	NA
578	Majorcan Black	CT	GG	GG	TT	AC	GG	GG	CT	AA	NA	AT	TC	GG	GG	CC	AA	TT	GG	GG	CC	AA	TT	del--del--	GG	TT	CT	CG	TT	AA	NA	GG	AA	GG	GA	CC	TT	TT	AA	AA
579	Majorcan Black	CT	GA	GG	TT	AA	NA	GG	CT	AA	NA	AT	TT	GG	GG	CC	AA	TT	GG	GG	CC	AA	TT	del--del--	GG	TC	CC	CG	TT	AA	CC	GG	AA	GG	GA	CC	TT	TG	AA	AA
580	Majorcan Black	CT	GA	GG	TT	AC	GA	GG	CC	AA	GA	TT	TC	GG	GG	CT	AA	CT	GG	GG	CC	AA	TT	insCCdel--	GG	TT	CT	CC	TT	AA	NA	GG	TA	GG	GG	CC	TT	TG	AA	AA
581	Majorcan Black	CT	GG	GG	TT	AC	GG	GG	CC	AA	GA	AT	CC	GG	GG	CC	AA	CT	GG	GG	CC	AA	TT	del--del--	GG	TT	CT	GG	TT	AA	NA	GG	TA	GG	AA	CC	TT	TT	AA	AA
582	Majorcan Black	TT	AA	GG	TT	CC	NA	GG	CT	AA	GA	TT	TC	GG	AG	CC	AA	TT	GG	GG	CC	AA	TT	del--del--	GG	TC	CC	CC	TT	AA	CC	GG	TA	GG	GG	CC	TT	GG	AA	AA
583	Majorcan Black	CT	GG	GG	GT	AC	AA	GG	CC	AA	GA	TT	CC	GG	AG	NA	AA	CT	GG	GG	CC	AA	TT	del--del--	GG	TT	CC	CC	TT	AA	NA	GG	AA	GG	GA	CC	TT	TG	AA	AA
584	Majorcan Black	CT	AA	GG	GT	AC	GG	GG	CC	AA	GA	AT	CC	GG	AG	CT	AA	TT	GG	GG	CC	AA	TT	del--del--	GG	TC	CT	CC	TT	AA	CC	GG	AA	GG	GG	CC	TT	GG	AA	AA
585	Majorcan Black	CT	AA	GG	GT	CC	GG	GG	CC	AA	GA	TT	TC	GG	AG	CT	AA	CC	GG	GG	CC	AA	TT	del--del--	GG	TT	TT	CC	TT	AA	CC	GG	TA	GG	GA	CC	TT	GG	AA	AA
586	Majorcan Black	CC	GA	GG	TT	AC	GG	GG	CC	AA	NA	AT	TC	GT	GG	CT	GA	CT	GG	GG	CC	AA	TT	del--del--	GG	TC	CT	CC	TT	AA	NA	GG	AA	GG	GA	CC	TT	TG	AA	AA
587	Majorcan Black	CT	GA	GG	GT	AA	GG	GG	CC	AA	NA	TT	CC	GG	GG	CT	AA	CT	GG	GG	CC	AA	TT	del--del--	GG	TT	CT	CC	TT	AA	CC	GG	AA	GG	GA	CC	TT	GG	AA	AA
588	Majorcan Black	CC	GA	GG	GT	AC	GA	GG	CC	AA	AA	AT	CC	GG	GG	CT	GA	TT	GG	GG	CC	AA	NA	insCCdel--	GG	TT	CT	CC	TT	AA	CC	GG	AA	GG	GA	CC	TT	TG	AA	AA
589	Majorcan Black	CC	AA	GG	TT	AC	AA	GT	CC	AA	AA	AT	CC	GG	GG	CC	GA	CT	GG	GG	CC	AA	TT	del--del--	GG	TT	CT	CG	TT	CC	NA	GG	AA	GG	GA	CC	TT	TT	AA	AA
590	Majorcan Black	CT	AA	GG	TT	AC	NA	GG	CC	AA	AA	AA	CC	GG	GG	CC	GA	CT	GG	GG	CC	AA	TT	del--del--	GG	TC	CC	CG	TT	CC	NA	GG	AA	GG	GG	CC	TC	TG	AA	AA
591	Majorcan Black	TT	AA	GG	TT	AC	NA	GG	CC	AA	GA	AT	CC	GG	GG	CC	GA	TT	GG	GG	CC	AA	TT	del--del--	GG	TT	CC	CC	TT	AC	CC	GG	TA	GG	GA	CC	TC	TT	AA	AA
592	Majorcan Black	CT	GA	GG	TT	AC	GG	GT	CC	AA	GA	AT	CC	GG	AG	CT	AA	CT	GG	GG	CC	AA	TT	del--del--	GG	TT	CT	CG	TT	AA	NA	GG	TA	GG	GA	CC	TT	GG	AA	AA
593	Majorcan Black	CT	GG	GG	TT	AC	NA	GG	CC	AA	NA	TT	TC	GG	AG	CC	GA	TT	GG	GG	CC	AA	TT	del--del--	GG	CC	CT	CC	TT	AA	CC	GG	TA	GG	AA	CC	TT	GG	AA	AA
594	Majorcan Black	CC	GG	GG	TT	CC	GG	GG	CC	AA	GA	TT	TC	GG	GG	CC	AA	CT	GG	GG	CC	AA	TT	del--del--	GG	TC	CT	CC	TT	AA	NA	GG	AA	GG	GA	CC	TT	GG	AA	AA
595	Majorcan Black	CC	GG	GG	TT	AA	GG	GG	CC	AA	AA	TT	CC	GT	GG	CC	AA	TT	GG	GG	CC	AA	TT	del--del--	GA	CC	CT	CC	TT	AA	NA	GG	AA	GG	GG	CC	TT	TG	AA	AA
596	Majorcan Black	TT	AA	GG	TT	AA	GG	GG	CC	AA	GA	AA	TC	GT	AG	CC	GA	TT	GG	GA	CT	AA	TT	del--del--	GG	TC	CC	CC	TT	AA	CC	GG	AA	GG	AA	CC	TT	TT	AA	AA
597	Majorcan Black	CT	GG	GG	TT	AC	GG	GG	CC	AA	GA	TT	CC	GG	AG	CC	AA	CT	GG	GG	CC	AA	TT	del--del--	GG	TT	CT	CC	TC	AA	CC	GG	TA	GG	GG	CC	TT	GG	AA	AA
598	Majorcan Black	CT	AA	GG	TT	AC	NA	TT	CC	AA	NA	AT	CC	GG	GG	CC	AA	TT	GG	GG	CC	AA	TT	del--del--	GG	TT	CT	CC	TT	AA	NA	GG	AA	GG	GA	CC	TT	TG	AA	AA
599	Majorcan Black	TT	GG	GA	TT	AC	GG	GT	CC	AA	GA	AT	CC	GG	GG	CC	GA	TT	GG	GG	CC	AA	TT	insCCdel--	GG	CC	CC	CC	TT	AC	NA	GG	AA	GG	GG	CC	TT	TG	AA	AA
600	Majorcan Black	CT	GG	GG	NA	AA	GG	GG	CC	AA	AA	TT	CC	GG	AG	CC	GA	CT	GG	GG	CC	AA	TT	del--del--	GG	TT	CC	CC	TT	AA	CC	GG	TA	GG	AA	CC	TT	GG	AA	AA
601	Majorcan Black	CT	GG	GG	TT	AC	GG	GT	CT	AA	GA	TT	TC	GG	AG	CC	AA	CC	GG	GG	CC	AA	TT	del--del--	GG	TT	CC	CC	TT	AA	CC	GG	TA	GG	GA	CC	TT	GG	AA	AA
602	Majorcan Black	CT	AA	GG	TT	AC	GA	GG	CC	AA	GA	AA	TC	GG	GG	CC	GG	TT	GG	GG	CC	AA	TT	del--del--	GG	TT	CT	CC	TC	AC	CC	GG	AA	GG	AA	CC	TT	GG	AA	AA
603	Majorcan Black	CT	GG	GG	TT	AC	GA	GT	TT	AA	NA	AT	TC	GG	GG	CC	AA	CC	GG	GG	CC	AA	TT	del--del--	GG	TC	CC	CC	TT	AA	NA	GG	TA	GG	GG	CC	TT	TG	AA	AA
604	Majorcan Black	CT	GG	GG	GT	AC	GG	GG	CT	AA	GA	AT	CC	GG	AG	CC	AA	TT	GG	GG	CC	AA	TT	del--del--	GG	TC	TT	CC	TT	AA	NA	GG	AA	GG	GG	CC	TT	GG	AA	AA
605	Majorcan Black	CT	AA	GG	TT	AC	GG	GG	CC	AA	GA	TT	CC	GT	GG	CC	NA	TT	GG	GG	CC	AA	TT	del--del--	GG	TC	CT	CC	TT	AA	CC	GG	TT	GG	GA	CC	TT	TG	AA	AA
606	Majorcan Black	CT	GG	GG	TT	CC	GG	GG	CT	AA	AA	TT	TT	GG	AG	CC	AA	TT	GG	GG	CC	AA	TT	del--del--	GG	TC	CC	CC	TT	AA	NA	GG	TA	GG	GG	CC	TT	GG	AA	AA
607	Majorcan Black	CT	AA	GG	TT	AA	GA	GT	CC	AA	AA	TT	CC	GG	GG	CC	AA	CT	GG	GG	CC	AA	TT	insCCdel--	GG	TC	CT	CC	TT	AA	CC	GG	TA	GG	GA	CC	TT	TG	AA	AA
608	Majorcan Black	CT	GG	GG	GT	AA	AA	GT	CC	AA	GA	AT	CC	GG	GG	CC	AA	CT	GG	GG	CC	AA	TT	del--del--	GG	TT	CT	CC	CC	AA	CC	GG	TA	GG	GG	CC	TT	GG	AA	AA
609	Majorcan Black	CT	GG	GG	TT	AA	GG	GT	CC	AA	GA	AT	TC	GT	GG	CC	AA	CT	GG	GG	CC	AA	TT	del--del--	GG	TC	TT	CC	TT	AA	NA	GG	TA	GG	GA	CC	TC	TT	AA	AA
610	Majorcan Black	CT	AA	GG	TT	AC	GA	GG	CC	AA	GA	TT	CC	GG	GG	CC	AA	TT	GG	GG	CC	AA	TT	del--del--	GG	TC	CC	CC	TT	AA	CC	GG	TA	GG	GA	CC	TT	TG	AA	AA
611	Majorcan Black	CT	GA	GG	TT	AA	GG	GT	CC	AA	GA	AT	CC	GG	AA	CC	GA	CC	GG	GG	CC	AA	TT	insCCdel--	GA	TT	CT	CC	TT	AA	CC	GG	AA	GG	GA	CC	TT	TG	AA	NA
612	Majorcan Black	CT	AA	GG	GT	AC	GG	GG	CC	AA	GA	TT	CC	GT	AG	CT	AA	TT	GG	GG	CC	AA	TT	del--del--	GG	TT	TT	CC	TT	AA	CC	GG	TA	GG	AA	CC	TT	GG	AA	AA
613	Majorcan Black	TT	GG	GG	TT	AA	AA	GG	CC	AA	AA	AA	CC	GG	AA	CC	NA	CT	GG	GG	CC	AA	TT	del--del--	GA	CC	CC	CC	TT	AA	CC	GG	AA	GG	GG	CC	TT	TG	AA	AA
614	Majorcan Black	CC	GG	GG	TT	AC	NA	GG	CC	AA	AA	AT	CC	TT	GG	CC	AA	TT	GG	GG	CC	AA	TT	del--del--	GA	TT	CT	CG	TT	AA	NA	GG	AA	GG	GA	CC	TT	TT	AA	AA
615	Majorcan Black	TT	GG	GG	TT	AA	GG	GG	CT	AA	GA	TT	CC	GG	GG	CC	GA	CC	GG	GG	CC	AA	TT	del--del--	GG	TT	TT	CC	TT	AA	NA	GG	TA	GG	GA	CC	TT	TT	AA	AA
616	Majorcan Black	CT	AA	GG	TT	AC	GG	GG	CC	AA	GA	TT	TC	GG	GG	CT	AA	CC	NA	GG	CC	GA	TC	del--del--	GG	TT	CT	CG	TT	AA	CC	GG	TA	GG	GA	CC	TT	GG	AA	AA
617	Majorcan Black	TT	GG	GG	TT	CC	NA	TT	CC	AA	GA	AT	TC	GG	AG	CT	AA	CT	NA	GG	CC	GA	TC	del--del--	GG	TC	CT	CG	TT	AC	CC	GG	AA	GG	GA	CC	TT	GG	AA	AA
618	Majorcan Black	TT	GG	GG	TT	AA	GG	GG	CC	AA	NA	AT	TT	GG	GG	CC	AA	TT	GG	GG	CC	GA	TT	del--del--	GG	TT	CC	CG	TT	AA	NA	GG	AA	GG	GG	CC	TT	TT	AA	AA
619	Majorcan Black	CT	GG	GG	TT	AA	GG	GT	CC	AA	AA	AT	CC	GG	GG	CC	AA	CT	GG	GG	CC	NA	TT	del--del--	GG	TT	CC	CC	TT	AA	NA	GG	AA	GG	GG	CC	TT	TT	AA	AA
620	Majorcan Black	CT	AA	GG	TT	CC	GG	GG	CC	AA	GA	TT	TC	GG	GG	CT	AA	CT	GG	GG	CC	NA	TT	del--del--	GA	TT	TT	CC	TT	AA	CC	GG	TA	GG	AA	CC	TT	TG	AA	AA
621	Mora Romagnola	CT	GG	GG	TT	AA	AA	GG	CT	AA	NA	AA	TC	GG	GG	CC	GA	CC	GG	GA	CT	GG	TT	del--del--	GG	TT	TT	CC	TT	AA	CC	GG	TT	GG	GG	CC	CC	GG	AA	AA
622	Mora Romagnola	CT	GG	GG	TT	AA	AA	GG	CT	AA	GG	AA	CC	GT	GG	CC	GA	CC	GG	GA	CT	GG	TT	del--del--	GA	TT	CT	CC	TT	AC	CC	GG	TT	GG	GG	CC	CC	GG	AA	AA
623	Mora Romagnola	TT	GG	GG	TT	AA	AA	GG	CT	AA	NA	AA	CC	GG	GG	CC	GA	CC	GG	AA	TT	GG	TT	del--del--	GG	TT	CC	CC	TT	AA	CA	GG	TT	GG	GG	CC	CC	GG	AA	AA
624	Mora Romagnola	CT	GG	GG	TT	AC	AA	GG	TT	AA	GA	TT	CC	GT	GG	CC	AA	CC	GG	GA	CT	GG	TT	del--del--	GG	TT	CT	CC	TT	AA	CC	GG	TT	GG	GG	CC	CC	GG	AA	AA
625	Mora Romagnola	CT	GG	GG	TT	NA	NA	NA	NA	NA	NA	NA	CC	NA	NA	CC	NA	CC	NA	GA	NA	NA	TT	NA	NA	TT	NA	NA	NA	NA	NA	NA	NA	GG	GG	CC	NA	NA	NA	NA
626	Mora Romagnola	NA	NA	NA	NA	NA	NA	NA	NA	NA	NA	NA	NA	NA	NA	NA	NA	NA	NA	NA	NA	NA	NA	NA	NA	NA	NA	NA	NA	NA	NA	NA	NA	NA	NA	NA	NA	NA	NA	NA
627	Mora Romagnola	CT	GG	GG	GT	AA	AA	GG	TT	AA	NA	AA	CC	GT	GG	CC	AA	CC	GG	GA	CT	GG	TT	del--del--	GG	TT	TT	CC	TT	AC	CC	GG	TT	GG	GG	CC	CC	GG	AA	AA
628	Mora Romagnola	CT	GG	GG	TT	NA	GA	GG	CC	AA	NA	AA	CC	GG	GG	CC	NA	CC	GG	GA	CT	GG	TT	del--del--	GA	TT	CT	CC	TT	AA	NA	GG	TT	GG	GG	CC	TC	GG	AA	AA
629	Mora Romagnola	NA	NA	NA	NA	NA	NA	NA	NA	NA	NA	NA	NA	NA	NA	NA	NA	NA	NA	NA	NA	NA	NA	NA	NA	NA	NA	NA	NA	NA	NA	NA	NA	NA	NA	NA	NA	NA	NA	NA
630	Mora Romagnola	TT	GG	GG	TT	AA	AA	GG	CC	AA	GA	AA	TC	GG	GG	CC	AA	CC	GG	AA	TT	GG	TT	del--del--	GG	TT	CC	CC	TT	AA	CC	GG	TT	GG	GG	CC	CC	GG	AA	AA
631	Mora Romagnola	CC	GG	GG	TT	AA	AA	GG	CT	AA	GA	AA	TC	GG	GG	CC	GA	CC	GG	GA	CT	GG	TT	del--del--	GG	TT	CT	CC	TT	AA	CC	GG	TT	GG	GG	CC	CC	GG	AA	AA
632	Mora Romagnola	TT	GG	GG	TT	AA	AA	GT	CT	AA	GA	AA	TC	TT	GG	CC	GA	CC	GG	GA	CT	GG	TT	del--del--	GG	TT	CT	CC	TT	AA	CC	GG	TT	GG	GG	CC	TC	GG	AA	AA
633	Mora Romagnola	CC	GG	GG	TT	AA	GA	GG	TT	AA	GA	AA	CC	GT	AG	CC	AA	CC	GG	GG	CC	GG	TT	del--del--	GG	TT	CT	CC	TT	AA	CC	GG	TT	GG	GA	CC	CC	GG	AA	AA
634	Mora Romagnola	NA	GG	GG	NA	AA	AA	GG	TT	AA	NA	AT	CC	GG	GG	CC	AA	CC	GG	GA	NA	GG	TT	del--del--	GG	TT	TT	CC	TT	AC	CC	GG	TT	NA	GG	CC	TC	GG	AA	AA
635	Mora Romagnola	TT	GG	GG	TT	AA	AA	GG	CC	AA	NA	AA	CC	GG	AG	CC	GA	CC	GG	GA	CT	GG	TT	del--del--	GA	TT	CC	CC	TT	AA	CC	NA	TT	GG	GG	CC	CC	GG	AA	AA
636	Mora Romagnola	TT	GG	GA	GT	AA	GA	GG	CT	AA	GA	AA	CC	TT	GG	CC	AA	CC	GG	GG	CC	GG	TT	del--del--	GG	TT	CT	CC	TT	AC	CC	GG	TT	GG	AA	CC	CC	GG	AA	AA
637	Mora Romagnola	TT	GG	GG	TT	AA	GA	GG	TT	AA	NA	AT	CC	GT	GG	CC	AA	CC	GG	GA	CT	GG	TT	del--del--	GG	TT	CT	CC	TT	AC	CC	GG	TT	GG	GG	CC	CC	GG	AA	AA
638	Mora Romagnola	TT	GG	GA	GT	AA	GA	GG	CC	AA	NA	AT	CC	GT	GG	CC	AA	CC	GG	GA	CT	GG	TT	del--del--	GG	TT	CT	CC	TT	AA	CC	GG	TT	GG	GG	CC	TC	GG	AA	AA
639	Mora Romagnola	CT	GG	GG	GT	AA	GA	GG	CT	AA	NA	AA	CC	TT	GG	CC	AA	CC	GG	GG	CC	GG	TT	del--del--	GG	TT	CT	CC	TT	AC	CC	GG	TA	GG	GA	CC	CC	GG	AA	AA
640	Mora Romagnola	TT	GG	GG	TT	AA	AA	GG	CT	AA	GA	AA	CC	GT	GG	CC	GA	CC	GG	GA	CT	GG	TT	del--del--	GG	TT	TT	CC	TT	NA	CC	GG	TA	GG	GA	CC	NA	GG	AA	AA
641	Mora Romagnola	TT	GG	GG	TT	AA	AA	GG	CT	AA	GA	AT	CC	GG	GG	CC	AA	CT	GG	GA	CT	GG	TT	del--del--	GA	TT	CT	CC	TT	NA	CC	GG	TT	GG	GG	CC	NA	GG	AA	AA
642	Mora Romagnola	CT	GG	AA	TT	AA	GA	GG	CC	AA	NA	AT	CC	GT	GG	CC	GA	CC	GG	GA	CT	GG	TT	del--del--	GG	TT	CT	CC	TT	AA	CC	GG	TT	GG	GG	CC	CC	GG	AA	AA
643	Mora Romagnola	TT	GG	NA	TT	AC	GA	GG	CC	AA	NA	AA	CC	GT	GG	CC	GA	CC	GG	AA	TT	GG	TT	del--del--	GG	TT	CT	CC	TT	AA	CC	GG	TT	GG	GG	CC	CC	GG	AA	AA
644	Mora Romagnola	TT	GA	AA	GT	AC	GG	GG	TT	AA	GA	AT	CC	TT	GG	CC	GA	CC	GG	AA	TT	GG	TT	del--del--	GA	TT	CC	CC	NA	AA	CC	NA	TA	GG	GA	CC	CC	GG	AA	AA
645	Mora Romagnola	TT	GG	GG	TT	AA	GA	GG	CT	AA	NA	AA	CC	GG	GG	CC	GA	CC	GG	AA	TT	GG	TT	del--del--	GG	TT	CC	CC	NA	AA	CC	GG	TT	GG	GG	CC	CC	GG	AA	AA
646	Mora Romagnola	CC	GG	GG	GT	AC	AA	GG	TT	AA	NA	AT	CC	TT	GG	CC	AA	CC	GG	GG	CC	GG	TT	del--del--	GA	TT	CT	CC	TT	AA	CC	GG	TT	GG	GG	CC	CC	GG	AA	AA
647	Mora Romagnola	CT	GG	GG	GG	AA	AA	GG	CT	AA	NA	AA	CC	TT	GG	CC	AA	CC	GG	GA	CT	GG	TT	del--del--	GA	TT	TT	CC	TT	AA	CC	GG	TT	GG	GG	CC	CC	GG	AA	AA
648	Mora Romagnola	TT	GA	GG	TT	AA	AA	GG	CT	AA	GA	AA	CC	GT	GG	CC	GA	CC	GG	GG	CC	GG	TT	del--del--	GG	TT	CC	CC	TT	AA	CA	GG	TA	GG	GA	CC	CC	GG	AA	AA
649	Mora Romagnola	CT	GG	GG	TT	AA	AA	GG	CT	AA	NA	AA	CC	GG	GG	CC	AA	CC	GG	GG	CC	GG	TT	del--del--	GA	TT	CC	CC	TT	AA	CC	GG	TT	GG	GG	CC	TC	GG	AA	AA
650	Mora Romagnola	TT	GG	GG	TT	CC	AA	GT	CT	AA	GA	AT	CC	GT	GG	CC	GA	CC	GG	GG	CC	GG	TT	del--del--	GG	TT	TT	CC	NA	AA	CC	GG	TA	GG	GG	CC	CC	GG	AA	AA
651	Mora Romagnola	TT	GG	GG	TT	AA	AA	GG	CC	AA	NA	AA	CC	GT	GG	CC	AA	CC	GG	GG	CC	GG	TT	del--del--	GG	TT	TT	CC	TT	AA	CC	GG	TT	GG	GG	CC	TC	GG	AA	AA
652	Mora Romagnola	CT	GG	GG	TT	AA	AA	GG	CT	AA	NA	AA	CC	GG	GG	CC	GA	CC	GG	GA	CT	GG	TT	del--del--	GG	TT	CT	CC	NA	AA	CC	GG	TT	GG	GG	CC	TC	GG	AA	AA
653	Mora Romagnola	TT	GG	NA	TT	AC	AA	GG	CC	AA	GG	AA	CC	GG	GG	CC	GA	CC	GG	GG	CC	GG	TT	del--del--	GG	TT	TT	CC	TT	AA	CC	GG	TT	GG	GG	CC	TC	GG	AA	AA
654	Mora Romagnola	TT	GG	GG	TT	AA	AA	GG	CT	AA	NA	AA	CC	GG	AG	CC	AA	CC	GG	GG	CC	GG	TT	del--del--	GG	TT	CT	CC	TT	AC	CC	GG	TT	GG	GG	CC	CC	GG	AA	AA
655	Mora Romagnola	TT	GG	GG	TT	AA	GA	GG	CC	AA	GA	AA	TC	GT	AG	CC	AA	CC	GG	GA	CT	GG	TT	del--del--	GA	TC	CC	CC	TT	AA	CC	GG	AA	GG	GA	CC	CC	TG	AA	AA
656	Mora Romagnola	TT	AA	NA	GT	AA	GA	GG	TT	AA	GG	AA	CC	TT	GG	CC	GA	CC	GG	AA	TT	GG	TT	del--del--	GG	TT	CC	CC	TT	NA	CC	GG	TA	GG	GG	CC	CC	GG	AA	AA
657	Mora Romagnola	TT	GG	GG	TT	AA	AA	GG	CT	AA	GA	AT	CC	GG	GG	CC	GA	CC	GG	GA	CT	GG	TT	del--del--	GG	TT	TT	CC	TT	AC	CC	GG	TT	GG	GG	CC	TC	GG	AA	AA
658	Mora Romagnola	CC	GG	GG	GT	AC	GA	GG	CT	AA	NA	TT	TC	TT	AG	CC	AA	CC	GG	GA	CT	GG	TT	del--del--	GA	TT	CC	CC	TT	AA	CC	GG	TT	GG	GA	CC	CC	GG	AA	AA
659	Mora Romagnola	CC	GG	GG	TT	AC	AA	GT	CT	AA	NA	AT	CC	GT	AG	CC	GA	CC	GG	GA	CT	GG	TT	del--del--	GA	TT	CT	CC	TT	AA	CC	GG	TT	GG	GG	CC	CC	GG	AA	AA
660	Mora Romagnola	CT	GG	GA	GT	AA	AA	GG	TT	AA	AA	AA	CC	GT	GG	CC	AA	CC	GG	GA	CT	GG	TT	del--del--	GG	TT	CT	CC	TT	AC	CC	GG	TA	GG	GG	CC	CC	GG	AA	AA
661	Mora Romagnola	CT	GG	GG	TT	AA	AA	GG	CT	AA	NA	AA	CC	GG	GG	CC	GA	CC	GG	AA	TT	GG	TT	del--del--	GA	TT	CT	CC	TT	AA	CC	GG	TT	GG	GG	CC	CC	GG	AA	AA
662	Mora Romagnola	CT	GG	GG	TT	AA	AA	GG	CT	AA	NA	AA	CC	GG	GG	CC	AA	CC	GG	GA	CT	GG	TT	del--del--	GA	TT	CT	CC	TT	AA	CC	GG	TA	GG	GG	CC	TC	GG	AA	NA
663	Mora Romagnola	CT	GG	GG	TT	AA	AA	GT	CC	AA	NA	AA	TC	GT	AG	CC	AA	CC	GG	GA	CT	GG	TT	del--del--	GA	TT	CT	CC	TT	AA	CC	GG	TA	GG	GG	CC	TC	GG	AA	AA
664	Mora Romagnola	TT	GG	GG	TT	AA	GG	GG	CT	AA	NA	AA	CC	TT	AG	CC	AA	CT	GG	GA	CT	GG	TT	del--del--	GG	TT	CT	CC	TT	AA	CC	GG	TA	GG	GA	CC	TC	GG	AA	AA
665	Mora Romagnola	CT	AA	GA	TT	AA	AA	GT	CC	AA	NA	AA	TC	GT	AG	CC	GA	CC	GG	GG	CC	GG	TT	del--del--	GA	TT	CT	CC	NA	AA	CC	GG	TA	GG	GG	CC	CC	GG	AA	AA
666	Mora Romagnola	CT	GG	GG	TT	AA	GA	GG	CC	AA	GA	AT	CC	GT	GG	CC	GG	CC	GG	AA	TT	GG	TT	del--del--	GG	TT	CC	CC	TT	NA	CC	GG	TT	GG	GG	CC	TC	GG	AA	AA
667	Mora Romagnola	CC	GG	GA	TT	AC	AA	GG	CT	AA	GA	AT	CC	GT	GG	CC	AA	CC	GG	AA	TT	GG	TT	del--del--	GA	TT	CT	CC	TT	AA	CC	GG	TA	GG	GG	CC	TC	GG	AA	AA
668	Moravka	CC	GG	GA	GT	AA	AA	GT	CT	AA	NA	TT	CC	GG	AA	CT	GG	CT	GA	GG	CC	GA	TC	insCCdel--	GA	TT	TT	CG	TT	AC	NA	GG	TA	GG	GG	CC	TT	GG	AA	AA
669	Moravka	TT	GG	GG	GT	AC	GG	GT	CT	AA	NA	TT	CC	GG	NA	CC	GA	NA	GA	GG	CC	GA	TC	insCCdel--	GA	TT	TT	CG	TT	NA	CC	GG	TT	GG	GG	CC	TT	GG	AA	NA
670	Moravka	CT	GG	GG	GG	AC	GG	GT	CT	AA	NA	AT	CC	GG	AG	CT	GG	CC	GA	GG	CC	GA	TC	del--del--	AA	TC	TT	CC	TT	AA	CC	GG	TT	GG	GA	CC	TT	GG	AA	AA
671	Moravka	CC	GG	GG	TT	AA	GG	GG	CC	AA	GA	AA	TC	GG	GG	CT	AA	CC	GG	GG	CC	GA	TT	del--del--	GA	TC	CC	CG	TT	AA	CC	GG	TT	GG	AA	TC	TC	GG	AA	AA
672	Moravka	CT	GA	GG	GT	CC	GA	GT	CT	AA	NA	AA	CC	GT	AA	CC	GG	CC	AA	NA	CC	GG	CC	del--del--	GA	TC	TT	CC	TT	AC	NA	GG	TA	GG	GG	CC	TC	GG	AA	AG
673	Moravka	CT	GA	GG	GG	CC	NA	GG	TT	AA	NA	AT	CC	GG	GG	CT	GG	CC	GG	GG	CC	AA	TT	del--del--	GA	CC	CT	CC	TT	AC	CC	GG	TA	GG	GA	CC	TT	GG	AA	AA
674	Moravka	CT	GG	GG	TT	AA	GG	GG	CT	AA	GA	TT	CC	GG	GG	CC	GA	CT	GA	GG	CC	GA	TC	del--del--	AA	CC	CC	CC	TT	AA	AA	GG	TA	GG	GA	CC	TT	GG	AA	AG
675	Moravka	CC	GG	GG	GT	AC	GA	GG	CC	AA	NA	AT	CC	GG	AA	CT	GA	TT	GA	GG	CC	GA	TC	del--del--	GG	TC	TT	CG	TT	AA	NA	GG	TT	GG	GA	CC	TT	GG	AA	AG
676	Moravka	CT	AA	GG	TT	AA	GG	GG	CT	AA	GA	TT	CC	GG	GG	CC	GA	CT	AA	NA	CC	GG	CC	del--del--	AA	CC	CC	CC	TT	AA	AA	GA	TA	GG	AA	CC	TT	GG	AA	GG
677	Moravka	CT	GG	GG	GT	CC	AA	GG	TT	AA	NA	TT	TC	GG	GG	CT	AA	CC	GA	GG	CC	NA	TC	del--del--	GA	CC	CT	CC	TT	AA	CC	GG	AA	GG	GA	CC	TT	GG	AA	AA
678	Moravka	CC	GG	GG	GG	AC	NA	GG	TT	AA	AA	AT	CC	GG	GG	CC	GA	CC	GA	GG	CC	GA	TC	insCCdel--	GA	CC	CT	CC	TT	AA	CC	GG	TA	GG	GA	CC	TT	GG	AA	AA
679	Moravka	CC	AA	GG	TT	AC	GA	GG	TT	AA	NA	AT	TC	GG	GG	CC	GA	TT	GA	GG	CC	GA	TC	del--del--	GG	TC	CT	CC	TT	AA	CC	GG	TT	GG	GG	CC	TC	GG	AA	AA
680	Moravka	CT	AA	GG	GG	AC	AA	GG	CT	AA	GA	TT	CC	GG	AG	CC	GA	CC	GA	GG	CC	GA	TC	insCCdel--	GA	CC	CT	CC	TT	AA	NA	GG	TA	GG	GA	CC	CC	GG	AA	AA
681	Moravka	CT	GA	GG	GG	AC	GG	GG	CT	AA	GA	AA	CC	GG	GG	CC	GA	CT	GA	GG	CC	GA	TC	del--del--	GG	TC	CT	CC	TT	AA	CC	GG	TA	GG	GA	CC	CC	TG	AA	AA
682	Moravka	CC	AA	GG	GT	CC	GG	GG	TT	AA	NA	AT	TC	GG	GG	CC	GG	TT	GG	GG	CC	AA	TT	insCCdel--	GG	TT	TT	CC	TT	AA	CC	GG	AA	GG	GA	CC	TT	GG	AA	AA
683	Moravka	CT	GA	GG	GT	AC	AA	GG	TT	AA	GA	TT	TC	GT	AG	CT	GA	CC	GA	GG	CC	GG	TC	del--del--	GA	TC	TT	CG	TT	AC	AA	GG	AA	GG	GA	CC	TT	GG	AA	AA
684	Moravka	CT	AA	GG	GT	CC	GA	GG	CT	AA	GA	AT	TC	GT	AG	CC	GG	CC	GA	GG	CC	GA	TC	insCCdel--	GA	TC	CT	CC	TT	AC	AA	GG	TA	GG	GG	CC	TT	GG	AA	AA
685	Moravka	CT	GA	GG	GT	AC	GG	GG	TT	AA	GA	TT	CC	GG	AA	CC	GG	CC	GA	GG	CC	GA	TC	del--del--	GA	TC	CC	CC	TT	AA	AA	GG	AA	GG	GG	CC	TC	GG	AA	AA
686	Moravka	CC	GA	GG	GT	AC	GA	GG	CT	AA	GA	TT	CC	GG	GG	CC	GG	TT	GA	GG	CC	GA	TC	insCCdel--	AA	TC	TT	CC	TT	AC	CC	GG	AA	GG	GA	CC	TT	TG	AA	AA
687	Moravka	CT	GA	GA	GT	AC	GA	GG	TT	AA	AA	AT	CC	GG	AA	CC	GA	CT	GG	GG	CC	AA	TT	insCCdel--	AA	TC	CC	CC	TT	AC	CC	GG	TT	GG	AA	CC	TT	GG	AA	AA
688	Moravka	CT	GA	GA	TT	AC	GG	GG	CT	AA	GA	AA	CC	GG	AG	CT	AA	CT	GG	GG	CC	AA	TT	del--del--	GA	TC	CT	CC	TT	AA	CC	GG	AA	GG	GA	CC	TT	GG	AA	AA
689	Moravka	CT	GA	NA	TT	CC	GG	GG	CT	AA	GG	TT	CC	GG	AG	CC	GA	CC	GG	GG	CC	AA	TT	insCCdel--	GG	TC	TT	CC	TT	AC	CC	GG	TA	GG	AA	CC	TC	GG	AA	AA
690	Moravka	CC	GA	GG	GT	CC	GG	GT	CC	AA	NA	AA	CC	GG	AG	CT	GG	CC	AA	NA	CC	GG	CC	del--del--	GA	TC	CT	CC	TT	AC	NA	GG	TA	GG	GG	CC	TT	GG	AA	AG
691	Moravka	CT	GA	GA	TT	AC	GG	GG	CT	AA	NA	TT	CC	GG	GG	CC	GA	CC	GG	GG	CC	AA	TT	del--del--	AA	TT	CC	CC	TT	AC	CC	GG	TA	GG	GA	CC	TT	GG	AA	AA
692	Moravka	CT	AA	GG	GG	AC	GG	GG	TT	AA	NA	AT	CC	GG	GG	CT	GA	CT	GA	GG	CC	GA	TC	insCCdel--	GG	TT	CT	CC	TT	AA	CC	GG	TA	GG	GA	CC	TC	GG	AA	AA
693	Moravka	CC	AA	GG	GG	CC	GA	GG	TT	AA	GA	AT	TC	GT	GG	CC	GG	TT	GG	GG	CC	AA	TT	insCCdel--	GA	TC	CT	CC	TT	AA	CC	GG	AA	GG	GG	CC	TC	GG	AA	AA
694	Moravka	CT	AA	GG	GT	CC	GA	GG	TT	AA	GA	AT	TC	GT	GG	CC	GG	TT	GG	GG	CC	AA	TT	insCCdel--	GG	TC	CT	CC	TT	AA	CA	GG	AA	GG	GA	CC	TC	GG	AA	AA
695	Moravka	CC	AA	GA	GT	AC	GA	GG	TT	AA	AA	AA	CC	GG	AG	CC	GA	CT	GG	GG	CC	AA	TT	insCCdel--	GA	TC	CT	CC	TT	AC	CC	GG	AA	GG	GG	CC	TC	GG	AA	AA
696	Moravka	CT	AA	GG	TT	AC	NA	GG	CT	AA	NA	AT	CC	GT	GG	CC	AA	CT	GA	GG	CC	GG	TC	del--del--	GG	CC	CT	CC	TT	AC	CC	GG	TA	GG	AA	CC	TC	GG	AA	AA
697	Moravka	CC	GG	GG	GG	AC	GA	GG	CT	AA	GA	AA	CC	GG	GG	CC	GA	CT	GA	GG	CC	GA	TC	del--del--	GA	TC	TT	CC	TT	AC	AA	GG	TA	GG	GA	CC	TT	GG	AA	AA
698	Moravka	CC	AA	GG	GT	AC	GG	GG	TT	AA	GA	AT	CC	GG	AG	CT	GG	CT	AA	NA	CC	GG	CC	del--del--	GG	CC	CT	CG	TT	AC	CC	GG	AA	GG	GA	CC	TT	GG	AA	AA
699	Moravka	CT	GG	GG	TT	AA	GG	GG	CC	AA	GA	AT	CC	GG	AG	CC	GG	CC	GA	GG	CC	GA	TC	del--del--	AA	TC	CT	CG	TT	AA	NA	GA	TT	GG	GA	CC	TT	GG	AA	AG
700	Moravka	TT	GG	GG	TT	AC	GG	GG	TT	AA	NA	TT	CC	GG	GG	CC	GA	TT	GG	GG	CC	AA	TT	insCCdel--	AA	CC	CC	CC	TT	AA	AA	GA	TA	GG	AA	CC	TT	GG	AA	AG
701	Moravka	TT	GA	NA	TT	CC	GG	GG	CT	AA	GG	AT	CC	GT	GG	CC	GA	CT	GA	GG	CC	GA	TC	del--del--	GA	CC	CT	CG	TT	AA	AA	GG	AA	GG	AA	CC	TT	GG	AA	AA
702	Moravka	CT	GA	GG	TT	CC	GG	GG	CC	AA	NA	TT	CC	GG	AG	CT	GG	CC	AA	NA	CC	GG	NA	del--del--	GA	TC	CT	CC	TT	AA	NA	GG	TA	GG	GA	CC	TT	GG	AA	AG
703	Moravka	CT	GA	NA	GT	AC	AA	GG	CT	AA	GA	TT	CC	GG	GG	CT	GG	CT	GG	GG	CC	AA	TT	del--del--	GA	CC	CT	CG	TT	AA	CC	GG	TT	GG	GA	CC	TT	GG	AA	AG
704	Moravka	CT	GA	GA	TT	AA	GG	GG	TT	AA	GA	TT	CC	GG	GG	CC	AA	CT	GG	GG	CC	AA	TT	del--del--	GA	CC	CC	CC	TT	AA	AA	GG	TT	GG	GA	CC	TT	GG	AA	AG
705	Moravka	TT	GA	GA	TT	AA	GG	GG	CT	AA	NA	TT	CC	GG	GG	CC	GA	CT	GA	GG	CC	GA	TC	del--del--	GA	TC	CT	CC	TT	AA	CA	GG	AA	GG	GG	CC	TT	GG	AA	AG
706	Moravka	CT	GA	GA	TT	AA	GG	NA	TT	AA	NA	TT	CC	GG	GG	CT	GA	CT	GG	GG	CC	AA	TT	del--del--	GA	CC	CC	CC	TT	AA	CC	GG	TA	GG	GA	CC	TT	GG	AA	AG
707	Moravka	CT	GA	GG	TT	AC	GA	GG	CT	AA	NA	AT	CC	GG	AG	TT	GG	NA	GG	GG	CC	AA	TT	del--del--	GG	TC	TT	CG	TT	AC	NA	GG	TT	GG	GA	CC	TT	GG	AA	AA
708	Moravka	CT	GG	GG	GT	CC	GA	GG	CT	AA	AA	TT	CC	GG	GG	CT	GG	CT	GA	GG	CC	GA	TC	del--del--	GA	CC	TT	CC	TT	AC	NA	GA	TA	GG	GA	CC	TT	GG	AA	AA
709	Moravka	TT	GG	GA	TT	AC	GG	GG	CT	AA	AA	TT	CC	GG	GG	CC	GA	CC	GA	GG	CC	GA	TC	del--del--	GA	TC	CT	CC	TT	AA	CA	GG	AA	GG	GA	CC	TT	GG	AA	GG
710	Moravka	CT	GG	GA	TT	AC	GG	GG	CT	AA	NA	TT	CC	GG	GG	CT	AA	CT	GG	GG	CC	AA	TT	del--del--	GA	CC	CT	CC	TT	AA	CA	GG	TA	GG	GA	CC	TT	GG	AA	AG
711	Moravka	TT	GA	GG	TT	AC	GG	GG	TT	AA	AA	TT	CC	GG	GG	CC	GA	CC	GA	GG	CC	GA	TC	del--del--	AA	CC	CT	CC	TT	AA	AA	GG	AA	GG	GA	CC	TT	GG	AA	AG
712	Moravka	CT	GA	GG	GG	AC	AA	GG	CT	AA	NA	AT	TC	GG	GG	CC	GG	TT	GA	GG	CC	GA	TC	insCCdel--	GG	TC	TT	CG	TT	AC	CC	GA	TA	GG	GG	CC	TT	GG	AA	AA
713	Moravka	TT	GG	NA	GT	CC	GG	GG	TT	AA	NA	AT	CC	GG	GG	CC	AA	CT	GG	GG	CC	AA	TT	del--del--	GA	CC	CT	CC	TT	AC	CC	GG	AA	GG	AA	CC	TT	GG	AA	AA
714	Moravka	CT	GA	GG	GG	CC	GA	GG	TT	AA	NA	AT	CC	GG	AG	CT	GG	TT	GA	GG	CC	GA	TC	insCCdel--	GG	TT	TT	CC	TT	AC	CC	GG	TA	GG	GG	CC	TT	GG	AA	AA
715	Moravka	CT	GA	NA	GG	AC	GA	GG	CC	AA	GA	AT	CC	GG	AG	CT	GA	TT	GA	GG	CC	GA	TC	del--del--	GG	TC	CT	CC	TT	CC	CA	GA	TT	GG	AA	TC	TT	GG	AA	AA
716	Nero Siciliano	CT	GG	GG	GT	AC	GG	GG	CT	AA	GA	TT	TC	GG	GG	CC	GG	CC	GG	GG	CC	AA	TT	insCCdel--	GG	TC	CT	CC	TT	CC	NA	GA	TA	GG	GA	CC	TC	GG	AA	AA
717	Nero Siciliano	CC	GA	GG	TT	CC	GA	GT	TT	AA	NA	TT	CC	GG	GG	CC	GA	CC	GG	GG	CC	AA	TT	del--del--	GG	TC	CT	CG	TT	CC	CC	GG	TT	GG	GG	CC	TT	TG	AA	AA
718	Nero Siciliano	NA	NA	NA	NA	NA	NA	NA	NA	NA	NA	NA	NA	NA	NA	NA	NA	NA	NA	NA	NA	NA	NA	NA	NA	NA	NA	NA	NA	NA	NA	NA	NA	NA	NA	NA	NA	NA	NA	NA
719	Nero Siciliano	CT	GG	GG	GT	AC	GA	GG	TT	AA	NA	TT	CC	GG	AG	CC	GG	CT	GG	GG	CC	AA	TT	del--del--	GG	TC	CT	CC	TT	AA	NA	NA	AA	GG	GG	CC	TT	GG	AA	AA
720	Nero Siciliano	NA	NA	NA	NA	NA	NA	NA	NA	NA	NA	NA	NA	NA	NA	NA	NA	NA	NA	NA	NA	NA	NA	NA	NA	NA	NA	NA	NA	NA	NA	NA	NA	NA	NA	NA	NA	NA	NA	NA
721	Nero Siciliano	CC	GA	GG	GT	AC	GA	GT	CT	AA	NA	TT	TC	GT	AG	CC	GA	CC	GG	GG	CC	AA	TT	del--del--	GG	TC	CT	CG	TT	AA	CC	GA	AA	GG	GG	CC	TT	TG	AA	AA
722	Nero Siciliano	NA	GA	GG	TT	CC	GG	GG	TT	AA	GA	AT	TC	GT	AG	CC	GG	CC	GG	GG	NA	AA	TT	insCCdel--	GA	TT	CC	CC	TT	NA	CC	NA	TT	GG	GA	CC	TT	GG	AA	AA
723	Nero Siciliano	NA	NA	NA	NA	AA	GA	GG	CT	AA	NA	AA	NA	GG	GG	NA	GA	NA	GG	NA	NA	AA	NA	del--del--	NA	NA	TT	CG	TT	NA	CC	GG	TT	NA	NA	NA	TT	GG	AA	AA
724	Nero Siciliano	CT	AA	NA	GT	CC	AA	GG	CT	AA	NA	AT	CC	GG	GG	CC	GG	CT	GA	GG	CC	GA	TC	insCCdel--	GA	TC	TT	CC	TT	AA	CC	GG	TA	GG	GG	CC	TT	GG	AA	AA
725	Nero Siciliano	NA	NA	NA	NA	AC	GA	GG	CC	AA	NA	AT	NA	GG	GG	NA	GG	NA	GG	NA	NA	AA	NA	del--del--	GG	NA	TT	CG	TT	AC	NA	GG	TT	NA	NA	CC	TT	GG	AA	NA
726	Nero Siciliano	CC	AA	GG	TT	NA	NA	NA	NA	NA	GA	NA	NA	NA	NA	CC	NA	CC	NA	GG	NA	NA	TT	NA	NA	TT	NA	NA	NA	NA	NA	NA	NA	NA	GG	CC	NA	NA	NA	NA
727	Nero Siciliano	CC	NA	GG	NA	AA	GA	GG	CT	AA	GA	AT	CC	GT	GG	CC	GA	CC	GG	GG	CC	AA	NA	insCCdel--	GG	NA	CT	CC	TC	AC	CC	GG	TT	GG	GG	CC	TT	GG	AA	AA
728	Nero Siciliano	CC	GA	NA	GT	AC	GG	GG	TT	AA	GG	AT	CC	GG	GG	CC	AA	CC	GG	GG	CC	AA	TT	insCCdel--	GA	CC	TT	CC	TC	AC	CC	GG	TT	GG	GG	CC	TT	GG	AA	AA
729	Nero Siciliano	CC	GA	GG	GT	AA	GG	GT	CC	AA	GA	TT	CC	GG	GG	CC	GG	CC	GA	GG	CC	GA	TC	del--del--	GG	TT	TT	CC	TT	AC	CA	GG	TT	GG	GG	CC	TT	GG	AA	AA
730	Nero Siciliano	CT	AA	GG	TT	CC	AA	GG	TT	AA	GA	TT	CC	GG	GG	CC	AA	CC	GG	GG	CC	AA	TT	del--del--	GG	TC	CT	CC	TC	AC	NA	GG	AA	GG	GG	CC	TT	GG	AA	NA
731	Nero Siciliano	TT	GG	GG	TT	AC	AA	GT	CC	AA	AA	TT	CC	GG	GG	CC	GG	CC	GG	GG	CC	AA	TT	del--del--	GA	TC	CT	CC	TC	AC	CC	GG	AA	GG	GG	CC	TT	GG	AA	AA
732	Nero Siciliano	CT	AA	GG	TT	AC	GA	GG	CC	AA	AA	TT	CC	GG	GG	CC	GG	CC	GG	GG	CC	AA	TT	del--del--	AA	TT	CC	CC	TT	AC	NA	GG	TA	GG	GG	CC	TT	TG	AA	AA
733	Nero Siciliano	CT	GG	GG	GT	AC	GA	GG	TT	AA	NA	AT	CC	GG	AG	CC	GG	CC	GG	GG	CC	AA	TT	del--del--	GG	TC	CC	CG	TT	AA	NA	GG	AA	GG	GG	CC	TC	TG	AA	AA
734	Nero Siciliano	CT	GG	GG	TT	AC	GA	TT	CT	AA	AA	TT	CC	GG	GG	CC	GA	CC	GG	GG	CC	AA	TT	del--del--	AA	TC	CC	CG	TT	AC	CC	GG	TA	GG	GG	CC	TT	TG	AA	AA
735	Nero Siciliano	CT	GA	GG	TT	AC	GA	GG	CC	AA	AA	TT	CC	GG	GG	CC	GG	CC	GG	GG	CC	AA	TT	insCCdel--	AA	TT	CC	CG	TT	AA	CC	GG	AA	GG	GG	CC	TC	TT	AA	AA
736	Nero Siciliano	CT	GG	GG	GT	CC	GG	GG	CT	AA	NA	AT	CC	GT	GG	CC	GA	CC	GG	GG	CC	AA	TT	insCCdel--	GA	CC	CT	CC	TT	AC	CC	NA	TA	GG	GG	CC	TT	GG	AA	AA
737	Nero Siciliano	TT	GA	GG	GT	AC	GG	GG	CC	AA	NA	AT	CC	GT	GG	CC	GA	CC	GG	GG	CC	AA	TT	insCCinsCC	GA	TC	TT	CC	TC	AC	CC	GG	TT	GG	GA	CC	TT	TG	AA	AA
738	Nero Siciliano	TT	GG	GG	GT	AA	AA	GG	CC	AA	GA	AT	TC	TT	GG	CC	GA	CC	GG	NA	CT	GA	TT	del--del--	GA	TT	TT	CC	CC	NA	CC	GG	TT	GG	GG	CC	TT	TG	AA	AA
739	Nero Siciliano	TT	GG	GG	TT	AA	GA	GG	CC	AA	GA	AA	TC	GG	GG	CC	GA	CC	GG	GG	CC	AA	TT	insCCdel--	GG	TC	TT	CC	CC	AA	CC	GG	TT	GG	AA	CC	TT	TG	AA	AA
740	Nero Siciliano	NA	GG	GG	TT	AA	GA	GG	CC	AA	NA	AT	TC	GG	GG	CC	AA	CC	GG	GA	NA	GA	TT	del--del--	GA	CC	TT	CC	CC	AC	CC	GG	TT	NA	NA	TC	TT	GG	AA	AA
741	Nero Siciliano	NA	NA	NA	NA	NA	NA	NA	NA	NA	NA	NA	NA	NA	NA	NA	NA	NA	NA	NA	NA	NA	NA	NA	NA	NA	NA	NA	NA	NA	NA	NA	NA	NA	NA	NA	NA	NA	NA	NA
742	Nero Siciliano	TT	GG	GG	GT	CC	GG	GG	TT	AA	GA	AA	CC	GG	GG	CC	GA	CC	GG	GG	CC	AA	TT	insCCdel--	GA	TC	CC	CC	CC	CC	CC	GG	TT	GG	GA	CC	TT	GG	AA	AA
743	Nero Siciliano	CC	GG	GG	GT	CC	AA	GG	CC	AA	GA	AT	TC	GG	AG	CC	NA	CC	GA	GG	CC	GA	TC	del--del--	GG	TT	CC	CC	TT	AC	CC	GG	AA	GG	GG	CC	TT	GG	AA	AA
744	Nero Siciliano	NA	NA	NA	NA	NA	NA	NA	NA	NA	NA	NA	NA	NA	NA	NA	NA	NA	NA	NA	NA	NA	NA	NA	NA	NA	NA	NA	NA	NA	NA	NA	NA	NA	NA	NA	NA	NA	NA	NA
745	Nero Siciliano	CT	GA	GG	GT	CC	GA	GG	CT	AA	NA	AT	CC	GG	AG	CT	GA	CC	GG	GG	CC	AA	TT	del--del--	GA	TC	TT	CC	TC	AC	CC	NA	TA	GG	GG	CC	TT	TG	AA	AA
746	Nero Siciliano	NA	NA	NA	NA	AA	GA	GG	CC	AA	NA	AA	NA	GG	AA	NA	GG	NA	GG	NA	NA	AA	NA	del--del--	GG	NA	TT	CC	TT	AA	CC	GG	TT	NA	NA	CC	TT	GG	AA	AA
747	Nero Siciliano	CC	AA	GG	GT	CC	AA	GG	CT	AA	AA	AT	CC	GT	AA	CC	AA	CT	GG	GG	CC	AA	TT	del--del--	GA	TC	CT	CG	TT	AA	CC	NA	AA	GG	GG	CC	TT	GG	AA	AA
748	Nero Siciliano	CT	GG	GG	TT	AC	AA	GG	CT	AA	AA	TT	CC	GG	GG	CC	AA	CC	GG	GG	CC	AA	TT	del--del--	AA	CC	CT	CC	TT	AA	NA	GG	TT	GG	GG	CC	TT	GG	AA	AA
749	Nero Siciliano	CT	GA	GG	TT	AC	GG	GG	CT	AA	AA	TT	CC	GT	AG	CC	AA	CC	GG	GG	CC	AA	TT	del--del--	GA	CC	CT	CC	TT	AC	CC	GG	TA	GG	GG	CC	TT	GG	AA	AA
750	Nero Siciliano	CT	GG	GG	TT	AA	AA	GG	TT	AA	GA	AT	CC	GG	GG	CC	AA	CC	GG	GG	CC	AA	TT	del--del--	AA	TC	CT	CC	NA	AA	CC	GG	TT	GG	GG	CC	TT	TG	AA	AA
751	Nero Siciliano	CT	GA	GG	TT	AC	GG	GG	CC	AA	GA	TT	CC	GG	AG	CC	AA	CC	GG	GG	CC	AA	TT	del--del--	GA	CC	CC	CG	TT	NA	CC	GG	TA	GG	GG	CC	TT	GG	AA	AA
752	Nero Siciliano	CT	GG	GG	TT	AA	GA	GT	CT	AA	GA	TT	CC	GG	AG	CC	GA	TT	GG	GG	CC	AA	TT	del--del--	GA	CC	CT	CC	TT	AC	CC	GG	TA	GG	GG	CC	TT	GG	AA	AA
753	Nero Siciliano	CC	GA	GG	GT	AC	GG	GG	CT	AA	GA	AT	CC	GG	AG	CC	GG	CC	GG	GG	CC	AA	TT	del--del--	GA	CC	CT	CC	TT	CC	CC	GG	AA	GG	GG	CC	TT	GG	AA	AA
754	Nero Siciliano	CC	GG	NA	GT	AA	GA	GG	CT	AA	GG	AA	CC	GG	AG	CC	GA	CC	GG	NA	CC	AA	TT	insCCdel--	GG	TC	CC	CC	TC	AA	CC	GG	TA	GG	GG	CC	TT	GG	AA	NA
755	Nero Siciliano	CC	GG	GG	TT	NA	NA	NA	NA	NA	GA	NA	TC	NA	NA	CC	NA	CT	NA	GG	CC	NA	TT	NA	NA	TC	NA	NA	NA	NA	NA	NA	NA	GG	GA	CC	NA	NA	NA	NA
756	Nero Siciliano	TT	AA	GG	TT	AC	GA	GG	CT	AA	NA	AT	CC	GG	GG	CC	AA	CC	GG	GG	CC	AA	TT	del--del--	GG	CC	CT	CC	TT	AC	CC	GA	TT	GG	GA	CC	TT	GG	AA	AA
757	Nero Siciliano	TT	GA	GG	GT	AC	AA	GG	CT	AA	NA	AA	CC	GT	GG	CC	AA	CT	GG	GG	CC	GA	TT	del--del--	GG	CC	CT	CC	CC	CC	CC	GG	TA	GG	GG	CC	TT	GG	AA	AG
758	Nero Siciliano	NA	GG	AA	TT	CC	AA	GG	CC	AA	GA	TT	CC	GT	GG	CC	GA	NA	GG	NA	NA	AA	TT	del--del--	AA	TT	CT	CC	TC	CC	CC	GG	TT	NA	GG	CC	TT	GG	AA	AA
759	Nero Siciliano	CC	GG	GA	TT	AC	GA	GG	TT	AA	AA	AT	CC	GT	GG	CC	GA	CC	GG	GG	CC	AA	TT	insCCdel--	GG	TT	CT	CC	TC	CC	CC	GG	TT	GG	GG	CC	TT	GG	AA	AA
760	Nero Siciliano	CT	GG	GA	GT	AC	GG	GG	CT	AA	AA	AT	CC	GG	GG	CC	GG	CT	GG	GG	CC	AA	TT	insCCdel--	GA	TC	TT	CC	TC	AC	NA	GG	TA	GG	GG	CC	CC	TG	AA	AA
761	Nero Siciliano	CT	GG	GG	TT	AC	AA	GG	TT	AA	AA	AT	TC	GT	AG	CC	GG	CC	GG	GG	CC	AA	TT	del--del--	GA	TC	CT	CC	TC	CC	CC	GG	TA	GG	GA	CC	TT	TG	AA	AA
762	Sarda	CC	GG	GG	GG	AC	GG	GG	TT	AA	GA	AT	TC	TT	GG	CT	AA	CC	GG	GG	CC	AA	TT	insCCinsCC	GG	TT	CT	CG	TT	AC	CA	GG	TA	GG	GA	CC	TC	TT	AA	AA
763	Sarda	CC	GA	NA	GT	AC	GG	GG	TT	AA	GG	AA	TC	GG	GG	CT	AA	TT	GG	GG	CC	AA	TT	del--del--	GG	CC	TT	CC	TT	AC	CC	GG	TT	GG	GG	CC	TT	TT	AA	AA
764	Sarda	CC	GA	GG	GT	AA	GA	GG	CC	AA	NA	TT	CC	GG	AA	CC	GA	CC	GG	GG	CC	AA	TT	insCCinsCC	GG	TC	CT	CC	TT	AC	AA	GG	TA	GG	GG	CC	TT	TG	AA	AA
765	Sarda	CT	GA	GG	GT	AC	GG	GG	CC	AA	GA	AT	CC	GG	AG	CC	GA	TT	GG	GG	CC	AA	TT	insCCdel--	GG	CC	CT	CC	TT	CC	CA	GG	TT	GG	GG	CC	TT	TG	AA	AA
766	Sarda	CC	GA	GG	GG	CC	AA	GG	CT	AA	GA	AA	CC	GG	AG	CC	GA	TT	GA	GG	CC	GA	TC	insCCdel--	GA	TT	CT	CG	TT	AC	AA	GG	AA	GG	GG	CC	TT	GG	AA	AA
767	Sarda	CT	AA	GA	GG	AC	NA	GG	CT	AA	GA	AT	CC	GG	GG	CC	AA	CC	GG	GG	CC	AA	TT	insCCinsCC	AA	TT	TT	CC	TT	AC	CC	GG	AA	GG	GA	CC	TT	GG	AA	AA
768	Sarda	TT	GG	GG	GT	AC	GG	GG	CC	AA	GG	AT	TC	GG	GG	CC	GA	CC	GG	GG	CC	AA	TT	insCCdel--	AA	TT	CC	CG	TT	AC	CC	GG	AA	GG	GA	CC	TT	GG	AA	AA
769	Sarda	CT	GG	GA	GT	AC	GG	GG	TT	AA	NA	AT	TC	GG	GG	CC	GG	CC	GG	GG	CC	AA	TT	insCCdel--	AA	TT	TT	CG	TT	AC	CC	GG	AA	GG	GA	CC	TT	TG	AA	AA
770	Sarda	CT	GG	GA	GT	AC	GG	GG	CT	AA	GA	AT	TC	GG	GG	CC	GG	CT	GG	GG	CC	AA	TT	insCCdel--	AA	TT	CC	CC	TT	AA	CC	GG	AA	GG	GA	CC	TC	GG	AA	AA
771	Sarda	CC	GG	GG	GG	AC	GA	GG	CC	AA	NA	AT	TC	TT	AG	CT	GA	CT	GG	GG	CC	AA	TT	insCCinsCC	GG	TC	CT	CC	TT	AC	CA	GG	TA	GG	GA	TC	TT	TG	AA	AA
772	Sarda	CC	AA	GG	GT	AA	AA	GT	CC	AA	NA	AT	TT	GT	AG	CC	GA	TT	GG	GG	CC	AA	TT	insCCinsCC	GA	TC	TT	CG	TT	AC	NA	NA	TA	GG	GG	TT	TT	TG	AA	AA
773	Sarda	CC	GG	GG	GT	AC	NA	GG	CC	AA	NA	AA	TC	TT	AG	CC	GG	CT	GG	GG	CC	AA	TT	insCCinsCC	GG	TC	TT	CC	TT	AA	AA	GG	TA	GG	GA	CC	TT	TG	AA	AA
774	Sarda	CT	AA	GA	TT	AC	GA	GG	CT	AA	NA	AT	TC	TT	AG	CC	GG	TT	GG	GA	CT	GG	TT	del--del--	GA	TC	CT	GG	TT	CC	NA	GG	TA	GG	GG	TC	TT	GG	AA	AA
775	Sarda	CC	GG	GG	GG	CC	AA	GT	TT	AA	GA	AT	TC	GG	GG	CC	GG	CT	GG	GG	CC	AA	TT	del--del--	GA	TT	CT	CC	TT	AC	NA	GG	TA	GG	GA	CC	TT	TG	AA	AA
776	Sarda	CC	GG	GG	GT	AC	GG	GT	CT	AA	GA	AT	CC	GG	GG	CC	GA	CT	GG	GG	CC	AA	TT	insCCdel--	GG	TT	CT	CG	TT	AA	NA	GG	TT	GG	GG	CC	TT	TG	AA	AA
777	Sarda	CT	GA	GG	GT	CC	GG	GT	CT	AA	GA	AT	TC	GG	GG	CC	GA	TT	GG	GG	CC	AA	TT	insCCdel--	GG	TT	TT	CC	TT	AA	AA	GG	TT	GG	GG	CC	TT	TG	AA	AA
778	Sarda	CT	GG	GG	GG	CC	GA	GT	TT	AA	GA	AT	TC	GG	GG	CC	AA	CT	GG	GG	CC	AA	TT	insCCdel--	GG	TT	TT	CC	TT	CC	NA	GG	TT	GG	GG	CC	TT	GG	AA	AA
779	Sarda	CC	AA	GG	GT	AA	GA	GT	CT	AA	NA	TT	CC	GG	AA	TT	AA	TT	GG	GG	CC	AA	TT	insCCdel--	GA	TT	TT	CC	TT	AA	AA	GG	TT	GG	AA	CC	TT	TT	AA	AA
780	Sarda	CT	GA	NA	GT	CC	GG	GG	CT	AA	GG	TT	CC	GG	AG	CC	AA	CT	GG	GG	CC	AA	TT	insCCinsCC	GG	TT	CC	CC	TT	AC	AA	GG	TT	GG	GG	CC	TT	GG	AA	AA
781	Sarda	CC	AA	GG	GT	AA	GA	GG	CC	AA	NA	TT	CC	GG	AA	CT	AA	TT	GG	GG	CC	AA	TT	insCCinsCC	GA	TT	TT	CC	TT	AA	CC	GG	TT	GG	AA	CC	TT	TT	AA	AA
782	Sarda	CT	AA	NA	TT	CC	GA	GT	CC	AA	GG	TT	CC	GG	AG	CT	AA	TT	GG	GG	CC	AA	TT	insCCdel--	GA	TT	CT	CG	TT	AC	AA	GG	TT	GG	GG	CC	TT	GG	AA	AA
783	Sarda	CT	GG	GG	GT	AC	GG	GG	CC	AA	GA	TT	CC	GG	AG	CC	GG	TT	GG	GG	CC	AA	TT	insCCinsCC	GA	TT	CT	CC	TT	AA	CC	GG	TT	GG	GA	CC	CC	GG	AA	AA
784	Sarda	TT	GA	GG	GG	AC	GG	GT	CT	AA	NA	AT	CC	GG	AG	CT	GG	CT	GG	GG	CC	AA	TT	insCCinsCC	GG	NA	CT	CG	TT	AC	CC	GG	NA	GG	GG	CC	TC	TT	AA	AA
785	Sarda	CC	AA	GG	GT	AC	NA	GT	CC	AA	GA	AT	CC	GT	AG	CC	GA	CT	GG	GG	CC	AA	TT	insCCdel--	GG	TC	TT	CC	TT	AA	NA	GG	AA	GG	GA	CC	TT	GG	AA	AA
786	Sarda	CC	GG	GG	GT	AC	GG	GG	CC	AA	NA	AT	CC	GG	AG	CC	GG	CC	GG	GG	CC	AA	TT	insCCinsCC	GA	TT	TT	CC	TT	AA	NA	GG	AA	GG	GA	CC	TT	GG	AA	AA
787	Sarda	CT	AA	GG	GG	AA	NA	GG	CT	AA	NA	AT	CC	GG	AG	CT	GA	CT	GG	GG	CC	AA	TT	insCCdel--	GG	TT	TT	CG	TT	AA	CC	GG	AA	GG	GA	CC	TT	TG	AA	AA
788	Sarda	CT	GG	NA	TT	AC	GA	GG	CC	AA	NA	TT	CC	GG	AG	CC	GG	CC	GG	GG	CC	AA	TT	insCCinsCC	GG	TC	CT	CG	TT	AA	CC	GG	TT	GG	GA	CC	TT	GG	AA	AA
789	Sarda	CC	GG	GG	GT	CC	GG	GG	CT	AA	GA	TT	TC	GG	AG	CC	GG	CT	GG	GG	CC	AA	TT	insCCinsCC	GG	TC	CT	CG	TT	AA	NA	GG	TT	GG	GG	TC	TC	GG	AA	AG
790	Sarda	TT	GG	GG	GT	AC	GA	GT	CC	AA	GA	TT	CC	GG	GG	CC	AA	TT	GG	GG	CC	AA	TT	insCCinsCC	GG	TC	CT	CC	TT	AA	AA	GG	TA	GG	GG	CC	TT	TG	AA	AA
791	Sarda	TT	GG	NA	GT	AA	GA	GT	CT	AA	NA	TT	CC	GG	GG	CC	AA	TT	GG	GG	CC	AA	TT	insCCinsCC	GG	TT	CT	CG	TT	AC	AA	GG	TA	GG	GG	CC	TT	TG	AA	AA
792	Sarda	CT	GG	GG	TT	AC	GG	GG	TT	AA	GA	TT	CC	GG	GG	CC	AA	CC	GG	GG	CC	AA	TT	insCCinsCC	GA	TT	TT	CC	TT	AC	AA	GG	TT	GG	GG	CC	TT	GG	AA	AA
793	Sarda	CT	GG	GG	TT	AC	GA	GG	TT	AA	GA	TT	CC	GG	GG	CC	AA	CT	GG	GA	CT	GA	TT	insCCdel--	AA	TC	CC	GG	TT	CC	CC	GG	TA	GG	GG	CC	TT	GG	AA	AA
794	Sarda	CC	GG	GG	GT	AC	GA	GT	CT	AA	GA	TT	CC	GG	GG	CC	AA	CT	GG	GG	CC	AA	TT	insCCinsCC	GA	TT	CT	CG	TT	AC	CA	GG	TT	GG	GA	CC	TT	GG	AA	AA
795	Sarda	CT	GG	GA	GT	CC	GA	GT	CC	AA	GA	AT	CC	GT	GG	CC	GA	TT	GA	GG	CC	GA	TC	insCCdel--	GG	TT	CC	CG	TT	CC	CC	GG	TT	GG	AA	CC	TT	GG	AA	AA
796	Sarda	CC	GA	GA	GT	CC	GG	GG	CC	AA	GA	AT	CC	TT	GG	CC	AA	TT	GG	GG	CC	AA	TT	insCCdel--	GA	TT	TT	CG	TC	AC	CC	GA	TT	GG	GA	CC	TT	GG	AA	AA
797	Sarda	CT	AA	GG	TT	CC	GA	GT	CT	AA	GA	AT	CC	TT	GG	CC	GA	CT	GG	GA	CT	GA	TT	del--del--	GA	TC	TT	CC	TT	CC	CC	GG	AA	GG	AA	CC	TT	GG	AA	AA
798	Sarda	CC	GA	GG	GG	CC	NA	GG	CT	AA	GA	AA	CC	GT	AA	CC	GA	TT	GA	GG	CC	GA	TC	insCCdel--	GA	TT	CT	CG	TT	AC	CC	GA	TA	GG	GA	CC	TT	GG	AA	AA
799	Sarda	CC	AA	GG	TT	CC	GG	GT	CT	AA	GA	AT	CC	TT	GG	CC	GA	CC	GG	GG	CC	AA	TT	insCCdel--	GA	TT	TT	CG	TT	CC	CC	GG	TA	GG	GA	CC	TT	GG	AA	AA
800	Sarda	CT	GG	GG	GT	AA	GA	GG	CC	AA	GA	AT	TC	GT	GG	CC	GG	TT	GG	GG	CC	AA	TT	insCCinsCC	GA	TT	CC	CC	TC	AA	NA	GG	TT	GG	AA	CC	TT	GG	AA	AA
801	Sarda	CT	GG	GG	GT	AC	GA	GG	CT	AA	GA	AA	CC	GT	GG	CT	GA	CT	GG	GG	CC	AA	TT	insCCdel--	GA	TT	CC	CC	TT	AC	NA	GG	TT	GG	AA	CC	TT	TG	AA	AA
802	Sarda	CT	GG	GG	GT	AC	GA	GG	CC	AA	GA	AT	CC	GT	GG	TT	GA	TT	GG	GG	CC	AA	TT	insCCdel--	GA	TC	TT	CC	TT	AC	NA	GG	TT	GG	GG	CC	TT	TG	AA	AA
803	Sarda	TT	GA	GG	TT	AA	NA	GG	CC	AA	GA	AT	TC	GT	GG	CC	GG	TT	GG	GG	CC	AA	TT	insCCinsCC	GA	TT	CT	CC	TT	AC	NA	GG	TA	GG	AA	CC	TT	GG	AA	AA
804	Sarda	CT	GA	GG	GT	AA	NA	GG	CC	AA	NA	AT	TC	TT	GG	CC	GG	CT	GG	GG	CC	AA	TT	insCCinsCC	AA	TC	CT	CC	TT	CC	CC	GG	TA	GG	GA	CC	TT	GG	AA	AA
805	Sarda	CT	GA	GA	TT	AA	GG	GG	CC	AA	NA	AT	NA	GG	AG	CC	AA	TT	GG	GG	NA	AA	TT	insCCdel--	GA	TT	CT	CG	TT	AC	AA	GG	TT	GG	AA	CC	TT	GG	AA	AA
806	Sarda	CT	GA	GG	TT	CC	GG	GT	CC	AA	GG	TT	CC	GG	GG	CC	AA	TT	GG	GG	CC	AA	TT	del--del--	GA	TT	TT	CC	TT	AC	NA	GG	TT	GG	AA	CC	TT	TG	AA	AA
807	Sarda	CT	GG	GG	TT	AC	GA	GG	CC	AA	GA	TT	CC	GG	AG	CC	AA	TT	GG	GG	CC	AA	TT	insCCdel--	AA	TT	TT	CC	TT	AC	AA	GG	TT	GG	GG	CC	TT	TG	AA	AA
808	Sarda	CC	GG	GG	GT	AC	GA	GG	TT	AA	GA	TT	CC	GT	GG	CT	GG	TT	GA	GG	CC	GA	TC	insCCdel--	GG	CC	CT	CC	TT	CC	NA	GG	TA	GG	GA	CC	TT	TG	AA	AA
809	Schwabisch Hallisches Schwein	TT	GG	GA	GG	AC	GA	GG	CC	AA	AA	AT	TC	GG	GG	CT	AA	CC	GG	GG	CC	AA	TT	del--del--	GA	TT	TT	CG	TT	CC	CC	GG	AA	GG	GA	CC	TT	GG	AA	AA
810	Schwabisch Hallisches Schwein	TT	GG	GG	GG	CC	GA	GG	CT	AA	NA	AA	TC	GG	GG	CT	GA	CC	GG	GG	CC	AA	TT	del--del--	GA	TC	CT	CC	TT	AA	CC	GG	TA	GG	GG	CC	TC	TG	AA	AA
811	Schwabisch Hallisches Schwein	CT	GG	GA	GT	AC	GA	GG	CC	AA	GA	AA	TC	GT	GG	CC	GG	CC	AA	NA	CC	GG	CC	del--del--	AA	TT	TT	CC	TT	NA	CC	GG	TT	GG	GA	CC	TT	TG	AA	AA
812	Schwabisch Hallisches Schwein	CC	GG	GG	GT	AC	GA	GG	CT	AA	NA	AA	TC	GG	AA	CC	GG	CC	GG	GG	CC	AA	TT	del--del--	GG	TC	CT	CC	TT	AC	CC	GA	TA	GG	GA	CC	TT	GG	AA	AA
813	Schwabisch Hallisches Schwein	CT	GG	NA	GG	AC	NA	GG	CT	AA	NA	AT	TC	GG	AA	CC	GG	CT	GA	GG	CC	GA	TC	del--del--	GA	CC	TT	CC	TT	AC	NA	GG	TA	GG	AA	CC	TT	GG	AA	AA
814	Schwabisch Hallisches Schwein	CT	GG	GG	GG	AC	NA	GG	CT	AA	NA	AT	TC	GG	AA	CC	GG	CT	GA	GG	CC	GA	TC	del--del--	GA	CC	TT	CC	TT	AC	NA	GG	TA	GG	AA	CC	TT	GG	AA	AA
815	Schwabisch Hallisches Schwein	TT	GG	GG	TT	AC	GA	GG	CC	AA	NA	AT	TC	GG	AG	CC	GG	CT	GG	GG	CC	AA	TT	del--del--	GA	TC	CT	GG	TT	AC	NA	GA	TT	GG	GG	CC	TC	GG	AA	AA
816	Schwabisch Hallisches Schwein	CC	GG	GA	GT	CC	GA	GG	CC	AA	NA	AA	CC	GG	AG	CC	GA	CC	GG	GG	CC	AA	TT	del--del--	GG	TC	TT	CC	TT	AA	CC	GG	TA	GG	GA	CC	TC	TG	AA	AA
817	Schwabisch Hallisches Schwein	CC	GA	GG	GT	CC	AA	GG	CC	AA	AA	AA	TC	GG	AG	CC	GA	CC	GG	GG	CC	AA	TT	del--del--	GG	TT	CT	CC	TT	AC	NA	GG	AA	GG	GA	CC	TT	GG	AA	AA
818	Schwabisch Hallisches Schwein	CC	GG	GA	GT	CC	AA	GG	CC	AA	AA	AA	CC	GG	AG	CC	NA	CC	GG	GG	CC	AA	TT	del--del--	GA	TC	TT	CG	NA	AC	CC	GG	TA	GG	GA	CC	TC	TG	AA	AA
819	Schwabisch Hallisches Schwein	CT	GG	GG	GT	CC	AA	GG	CC	AA	GA	AA	TC	GG	GG	CT	GA	CC	GA	GG	CC	GA	TC	del--del--	GA	TC	CT	CC	TT	AA	CC	GG	TA	GG	AA	CC	TC	GG	AA	AA
820	Schwabisch Hallisches Schwein	CT	GG	GG	GG	AC	GG	GG	NA	AA	NA	TT	TC	GG	AA	CC	GA	CC	GG	GG	CC	AA	TT	del--del--	GG	TC	TT	CC	TT	CC	NA	GG	AA	GG	GA	CC	TT	GG	AA	AA
821	Schwabisch Hallisches Schwein	CT	GG	GG	GT	AC	GG	GG	CT	AA	GA	AA	TC	GG	AG	CT	GG	CC	GA	GG	CC	GA	TC	del--del--	GA	TC	CT	CG	TT	CC	NA	GG	TA	GG	GG	CC	TC	GG	AA	AA
822	Schwabisch Hallisches Schwein	CT	AA	GG	TT	AC	GA	GG	CC	AA	NA	AA	TT	GG	GG	CC	GA	CC	GG	GG	CC	AA	TT	del--del--	GG	TT	CT	CC	TT	CC	NA	GG	TA	GG	GA	CC	TC	GG	AA	AA
823	Schwabisch Hallisches Schwein	TT	GG	GG	TT	CC	GG	GG	CC	AA	GA	AT	TC	GG	GG	CT	GA	CC	GG	GG	CC	AA	TT	del--del--	GG	CC	TT	CC	TT	CC	NA	GG	TA	GG	GG	CC	TT	GG	AA	AA
824	Schwabisch Hallisches Schwein	TT	GG	GG	GT	CC	GA	GG	CC	AA	NA	AA	CC	GT	AG	CC	GA	CC	GG	GG	CC	AA	TT	del--del--	GG	TC	TT	GG	TT	CC	NA	GG	TT	GG	GA	CC	TT	GG	AA	AA
825	Schwabisch Hallisches Schwein	CT	GG	GG	TT	CC	GG	GG	CT	AA	NA	AA	CC	GG	GG	CT	GA	CC	GA	GG	CC	GA	TC	del--del--	GA	TT	TT	GG	TT	CC	CC	GG	TA	GG	GA	CC	TT	GG	AA	AA
826	Schwabisch Hallisches Schwein	CT	GG	GA	GT	CC	GG	GG	CC	AA	GA	AT	CC	GG	GG	CC	GG	CC	GA	GG	CC	GA	TC	del--del--	GA	CC	TT	CC	TT	CC	NA	GG	TA	GG	GA	CC	TT	GG	AA	AA
827	Schwabisch Hallisches Schwein	TT	GG	GG	GG	CC	GG	GG	CC	AA	NA	AT	CC	GG	AA	CC	GA	CC	GG	GG	CC	AA	TT	del--del--	GG	CC	TT	CC	TT	CC	NA	GG	AA	GG	AA	CC	TT	GG	AA	AA
828	Schwabisch Hallisches Schwein	CT	GG	GG	TT	CC	GG	GG	CT	AA	AA	AA	TC	GG	AA	CC	GA	CC	GG	GG	CC	AA	TT	del--del--	GG	TC	TT	CG	TT	CC	CC	GA	TA	GG	GA	CC	TT	GG	AA	AA
829	Schwabisch Hallisches Schwein	CC	AA	GG	TT	AA	GG	GG	CC	AA	AA	AT	TT	GG	GG	CC	GG	CC	GG	GG	CC	AA	TT	del--del--	GG	TT	TT	CG	TT	CC	CC	NA	TA	GG	GA	CC	TC	GG	AA	AA
830	Schwabisch Hallisches Schwein	CC	GG	GA	GT	AC	GG	GG	TT	AA	NA	AA	TC	GG	AG	CC	GA	CC	GG	GG	CC	AA	TT	del--del--	GG	TC	TT	CC	TT	CC	NA	GG	AA	GG	GA	CC	TT	GG	AA	AA
831	Schwabisch Hallisches Schwein	TT	GG	NA	TT	AC	GG	GG	CC	AA	GG	TT	CC	GG	AG	CT	GA	CC	GG	GG	CC	AA	TT	del--del--	GA	CC	TT	CC	TT	AC	NA	GG	TA	GG	GA	CC	TT	GG	AA	AA
832	Schwabisch Hallisches Schwein	CT	GA	GG	GT	CC	GA	GG	CT	AA	GA	AA	TC	GG	AG	CC	GA	CT	GG	GG	CC	AA	TT	del--del--	GA	TC	CT	CG	TT	NA	NA	GG	TT	GG	GG	CC	TC	GG	AA	AA
833	Schwabisch Hallisches Schwein	CC	GA	GG	TT	AC	GA	GG	CC	AA	AA	AT	TC	GG	GG	CT	GG	CC	GG	GG	CC	AA	TT	del--del--	GA	TC	CC	CC	TT	AC	NA	GG	TT	GG	GA	CC	TT	GG	AA	AA
834	Schwabisch Hallisches Schwein	CT	GG	GG	GT	AC	NA	GG	CT	AA	GA	AT	TC	GG	GG	CT	GA	CC	GA	GG	CC	GA	TC	del--del--	AA	CC	TT	CC	TT	CC	NA	GG	AA	GG	GA	CC	TT	GG	AA	AA
835	Schwabisch Hallisches Schwein	CT	GG	GG	GT	AC	GG	GG	CT	AA	NA	AT	TC	GG	AG	CC	GG	CC	GG	GG	CC	AA	TT	del--del--	GA	TC	TT	CG	TT	CC	CC	GA	TT	GG	GG	CC	TT	GG	AA	AA
836	Schwabisch Hallisches Schwein	TT	GG	GG	TT	CC	GG	GG	CT	AA	AA	AT	CC	GT	AG	CT	GA	CC	GG	GG	CC	AA	TT	del--del--	GA	CC	TT	CG	TT	AC	NA	GG	AA	GG	GG	CC	TT	GG	AA	AA
837	Schwabisch Hallisches Schwein	TT	GG	GG	GG	CC	NA	GG	CC	AA	NA	AA	CC	GG	AG	CC	GA	CC	GA	GG	CC	GA	TC	del--del--	GG	TC	TT	CC	TT	CC	CC	GG	TA	GG	GA	CC	TT	GG	AA	AA
838	Schwabisch Hallisches Schwein	CT	GG	GG	GG	AC	GG	GG	CC	AA	GA	AT	TC	GG	AA	CT	GA	CC	GG	GG	CC	AA	TT	del--del--	GG	TC	TT	CG	TT	CC	NA	GG	TT	GG	GG	CC	TT	GG	AA	AA
839	Schwabisch Hallisches Schwein	CT	GG	GG	GG	AC	GG	GG	CT	AA	AA	AA	TT	GG	AG	CC	GG	CC	AA	NA	CC	GG	CC	del--del--	GA	TC	TT	CG	TT	CC	NA	GG	AA	GG	GA	CC	TT	TG	AA	AA
840	Schwabisch Hallisches Schwein	TT	GG	GG	GG	CC	GG	GG	CC	AA	GA	AA	CC	GG	AA	CC	GG	CC	GG	GG	CC	AA	TT	del--del--	GG	TC	TT	CG	TT	CC	CC	GG	TA	GG	GA	CC	TT	TG	AA	AA
841	Schwabisch Hallisches Schwein	CC	GG	GG	GT	CC	GG	GG	CC	AA	AA	AA	TC	GG	AA	CC	GA	CC	GG	GG	CC	AA	TT	del--del--	GA	TC	TT	CC	TT	AC	CC	GG	TA	GG	GA	CC	TT	GG	AA	AA
842	Schwabisch Hallisches Schwein	TT	GG	GG	TT	CC	GG	GG	CT	AA	AA	AA	CC	GG	AA	CC	AA	CC	GG	GG	CC	AA	TT	del--del--	GG	CC	TT	CC	TT	CC	CC	GG	TA	GG	GA	CC	TT	GG	AA	AA
843	Schwabisch Hallisches Schwein	TT	GG	GG	GG	CC	GG	GG	CC	AA	NA	AT	CC	GG	AA	CC	GA	CC	GG	GG	CC	AA	TT	del--del--	GG	CC	TT	CC	TT	NA	NA	GG	AA	GG	AA	CC	TT	GG	AA	AA
844	Schwabisch Hallisches Schwein	CT	GG	GG	GT	CC	GG	GG	CC	AA	GA	AT	CC	GT	GG	CT	GA	CC	GA	GG	CC	GA	TC	del--del--	AA	CC	TT	CC	TT	CC	CC	GG	TT	GG	GG	CC	TT	GG	AA	AA
845	Schwabisch Hallisches Schwein	CT	AA	GG	TT	AA	GG	GG	CC	AA	AA	AA	TT	GG	AG	CT	GG	CC	GG	GG	CC	AA	TT	del--del--	GG	TC	CT	CG	TT	AC	NA	GG	TT	GG	GA	CC	TT	GG	AA	AA
846	Schwabisch Hallisches Schwein	TT	AA	GG	GT	CC	GG	GG	CT	AA	NA	AT	TC	GG	AA	CC	GA	CC	GG	GG	CC	AA	TT	del--del--	GG	TC	TT	CG	TT	CC	NA	GG	AA	GG	GA	CC	TT	GG	AA	AA
847	Schwabisch Hallisches Schwein	CC	GG	GG	GT	CC	NA	GG	CC	AA	NA	AA	TC	GG	AG	CC	GG	CC	GG	GG	CC	AA	TT	del--del--	GG	TC	TT	CC	TT	AA	NA	GG	AA	GG	GG	CC	TT	GG	AA	AA
848	Schwabisch Hallisches Schwein	CC	GG	GG	GT	CC	NA	GG	CT	AA	NA	AA	TC	GG	AA	CC	AA	CC	GG	GG	CC	AA	TT	del--del--	GG	TC	TT	CG	TT	AC	NA	GG	AA	GG	GG	CC	TT	GG	AA	AA
849	Schwabisch Hallisches Schwein	CT	GG	GG	GT	CC	GG	GG	CT	AA	GA	AA	CC	GG	AA	CC	GA	CC	GG	GG	CC	AA	TT	del--del--	GG	TC	TT	CC	TT	AC	NA	GG	AA	GG	GA	CC	TC	GG	AA	AA
850	Schwabisch Hallisches Schwein	CC	GG	GG	GG	CC	GA	GG	CC	AA	GA	TT	TC	GG	AG	CC	NA	CC	GG	GG	CC	AA	TT	del--del--	GA	TC	TT	GG	TT	AA	NA	GG	TT	GG	GA	CC	TT	TG	AA	AA
851	Schwabisch Hallisches Schwein	TT	GG	GA	GG	CC	GG	GG	CC	AA	NA	AA	TC	GG	AG	CC	GA	CT	GG	GG	CC	AA	TT	del--del--	GA	CC	TT	CC	NA	AA	NA	GG	AA	GG	GG	CC	TC	NA	AA	AA
852	Schwabisch Hallisches Schwein	TT	GG	GG	GT	AC	GG	GG	CT	AA	NA	AA	TC	GG	NA	CC	GA	CC	GG	GG	CC	AA	TT	del--del--	NA	TC	NA	CC	TT	AC	NA	GG	TA	GG	GG	CC	TT	GG	AA	AA
853	Schwabisch Hallisches Schwein	CC	GG	GG	TT	AC	GG	GG	CC	AA	GA	AT	TC	GG	GG	CT	GG	CC	GA	GG	CC	GA	TC	del--del--	GA	CC	TT	CC	TT	CC	NA	GG	TA	GG	GG	CC	TT	GG	AA	AA
854	Schwabisch Hallisches Schwein	CT	GG	GG	TT	AA	NA	GG	CC	AA	AA	AT	TT	GG	GG	CT	GG	NA	GA	GG	CC	GA	TC	del--del--	GA	TC	TT	CC	TT	AC	NA	GG	TT	GG	GA	CC	TT	GG	AA	AA
855	Schwabisch Hallisches Schwein	CC	GG	GG	GT	AC	GG	GG	CC	AA	NA	AA	TC	GG	AG	CT	AA	CC	GG	GG	CC	AA	TT	del--del--	GA	TC	CT	CG	TT	CC	NA	GG	TA	GG	GG	CC	TT	TG	AA	AA
856	Schwabisch Hallisches Schwein	TT	GG	GG	GT	CC	GG	GG	CC	AA	AA	AA	TC	GG	AG	CC	GG	CC	GG	GG	CC	AA	TT	del--del--	GG	TC	TT	CC	TT	AC	NA	GG	TA	GG	GA	CC	TT	GG	AA	AA
857	Swallow Bellied Mangalitsa	CT	GA	GG	GT	AA	NA	GG	CC	AA	GA	AA	TC	GT	GG	CT	GA	CC	GG	GG	CC	GG	TT	del--del--	GG	TC	TT	CC	TT	AA	NA	GG	TT	GG	AA	CC	TT	TG	AA	AA
858	Swallow Bellied Mangalitsa	CC	AA	GG	GT	AC	GG	GG	CC	AA	GA	TT	CC	GG	GG	CT	AA	CT	GG	GG	CC	GG	TT	del--del--	GG	CC	TT	CC	TT	AA	NA	GG	TT	GG	GA	CC	TT	TG	AA	AA
859	Swallow Bellied Mangalitsa	TT	GA	NA	GT	AA	GG	GG	CT	AA	NA	AT	CC	GG	GG	TT	AA	CT	GG	GG	CC	GG	TT	del--del--	GG	TC	TT	CG	TT	AA	CC	GG	TA	GG	AA	CC	TT	GG	AA	AA
860	Swallow Bellied Mangalitsa	CC	GG	GG	TT	AC	NA	GG	CC	AA	GA	AT	TT	GG	GG	TT	AA	CC	GG	GG	CC	GG	TT	del--del--	GG	TC	CT	CC	TT	AA	CC	GG	TA	GG	AA	CC	TT	TG	AA	AA
861	Swallow Bellied Mangalitsa	CT	AA	NA	TT	AA	GG	GG	CC	AA	GG	AT	CC	GG	GG	TT	AA	CC	GG	GG	CC	GG	TT	del--del--	GG	TC	TT	CC	TT	AA	NA	GG	TT	GG	GG	CC	TT	GG	AA	AA
862	Swallow Bellied Mangalitsa	CC	AA	NA	TT	AC	GG	GG	CC	AA	GG	AT	TC	GG	GG	TT	AA	CT	GG	GG	CC	GG	TT	del--del--	GG	TT	TT	CG	TT	AA	CC	GG	TT	GG	GA	CC	TC	TG	AA	AA
863	Swallow Bellied Mangalitsa	CC	GG	NA	TT	AA	GG	GG	CC	AA	GG	TT	CC	GG	GG	CT	AA	CC	GG	GG	CC	GG	TT	del--del--	GG	CC	CC	CC	TC	AA	CC	GA	AA	GG	GG	CC	TT	GG	AA	AA
864	Swallow Bellied Mangalitsa	CC	AA	GG	TT	AC	AA	GT	CC	AA	GA	AT	TC	GT	GG	TT	AA	CC	GG	GG	CC	GG	TT	del--del--	GG	CC	CT	CC	TT	AA	CC	GA	TT	GG	AA	CC	TT	TG	AA	AA
865	Swallow Bellied Mangalitsa	CT	AA	GG	TT	AA	GG	GG	CC	AA	GA	AA	TC	GT	GG	TT	AA	CC	GG	GG	CC	GG	TT	del--del--	GA	TC	CT	CC	TT	AA	CC	GG	TT	GG	AA	CC	TT	TG	AA	AA
866	Swallow Bellied Mangalitsa	TT	GG	GG	TT	AA	NA	GG	CC	AA	GA	AA	TT	GG	GG	CT	AA	CT	GG	GG	CC	GG	TT	del--del--	GG	TC	TT	CC	TT	AA	CC	GG	TT	GG	GA	CC	TT	GG	AA	AA
867	Swallow Bellied Mangalitsa	CT	AA	NA	TT	AA	GG	GG	CT	AA	NA	AT	TC	GT	GG	CT	AA	CC	GG	GG	CC	GG	TT	del--del--	GG	TC	TT	CC	TT	AA	CC	GG	TT	GG	AA	CC	TT	GG	AA	AA
868	Swallow Bellied Mangalitsa	CC	GA	GG	GT	AA	GG	GG	CC	AA	GA	TT	TC	GG	GG	CC	AA	CC	GG	GG	CC	GG	TT	del--del--	GG	TT	TT	CC	TT	AA	NA	GG	TA	GG	AA	CC	TC	TT	AA	AA
869	Swallow Bellied Mangalitsa	CT	AA	GG	GT	CC	GG	GG	CC	AA	GA	AT	TC	GG	GG	TT	AA	CC	GG	GG	CC	GG	TT	del--del--	GG	TT	CT	CG	TT	AA	CC	GG	TT	GG	GA	CC	TT	TG	AA	AA
870	Swallow Bellied Mangalitsa	CC	GG	GG	GT	AA	GG	GG	CC	AA	GA	TT	TC	GT	GG	CT	AA	CC	GG	GG	CC	GG	TT	del--del--	GG	TT	CT	GG	TT	AA	CC	GG	TA	GG	AA	CC	TC	TG	AA	AA
871	Swallow Bellied Mangalitsa	CC	GA	GG	TT	AA	GG	GG	CC	AA	GA	AT	TC	GG	GG	TT	AA	CC	GG	GG	CC	GG	TT	del--del--	GG	TT	TT	CG	TT	AA	CC	GG	TT	GG	GA	CC	TT	TG	AA	AA
872	Swallow Bellied Mangalitsa	CC	AA	GG	TT	AC	NA	GG	CC	AA	GA	TT	CC	GG	GG	TT	AA	CC	GG	GG	CC	GG	TT	del--del--	GG	TC	TT	CG	TT	AA	NA	GG	TA	GG	AA	CC	TT	GG	AA	AA
873	Swallow Bellied Mangalitsa	CC	GG	GG	GT	AC	GG	GG	CC	AA	NA	TT	CC	GG	GG	TT	AA	CT	GG	GG	CC	GG	TT	del--del--	GG	TC	TT	CC	TC	AA	CC	GG	TA	GG	GA	CC	TT	GG	AA	AA
874	Swallow Bellied Mangalitsa	CT	GG	GG	TT	AA	AA	GG	CC	AA	NA	TT	CC	GT	GG	TT	AA	CC	GG	GG	CC	GG	TT	del--del--	GG	TC	TT	CG	TT	AA	CC	GG	TA	GG	AA	CC	TT	GG	AA	AA
875	Swallow Bellied Mangalitsa	CC	GG	GG	TT	AC	GG	GG	CC	AA	NA	AT	CC	GG	GG	TT	AA	TT	GG	GG	CC	GG	TT	del--del--	GG	TC	TT	CG	TT	AA	CC	GG	AA	GG	AA	CC	TT	GG	AA	AA
876	Swallow Bellied Mangalitsa	CC	GA	GG	TT	AA	GG	GG	CC	AA	GA	TT	CC	GT	GG	TT	AA	CC	GG	GG	CC	GG	TT	del--del--	GA	TC	TT	CC	TT	AA	CC	GG	AA	GG	AA	CC	TT	GG	AA	AA
877	Swallow Bellied Mangalitsa	CT	AA	GG	TT	AA	NA	GG	CC	AA	NA	AT	TC	GG	GG	TT	AA	TT	GG	GG	CC	GG	TT	del--del--	GG	CC	CT	CG	TT	AA	CC	GG	AA	GG	AA	CC	TT	GG	AA	AA
878	Swallow Bellied Mangalitsa	CC	GG	GG	TT	AA	NA	GG	CC	AA	NA	TT	CC	GT	GG	CT	AA	CC	GG	GG	CC	GG	TT	del--del--	GG	TT	TT	CC	TT	AA	CC	GG	TA	GG	AA	CC	TT	GG	AA	AA
879	Swallow Bellied Mangalitsa	CC	GG	GG	TT	AA	NA	GG	CC	AA	NA	AA	CC	GG	GG	TT	AA	CC	GG	GG	CC	GG	TT	del--del--	GG	TT	TT	CC	TT	AA	CC	GG	TA	GG	AA	CC	TT	GG	AA	AA
880	Swallow Bellied Mangalitsa	CC	GG	GG	TT	AC	NA	GG	CC	AA	NA	AT	CC	GT	GG	CT	AA	CC	GG	GG	CC	GG	TT	del--del--	GG	TC	TT	CC	TT	AA	CC	GG	TA	GG	AA	CC	TT	GG	AA	AA
881	Swallow Bellied Mangalitsa	CC	GA	GG	TT	AA	NA	GG	CC	AA	GA	AT	CC	GG	GG	TT	AA	CT	GG	GG	CC	GG	TT	del--del--	GG	CC	CT	CG	TT	AA	CC	GG	AA	GG	AA	CC	TT	GG	AA	AA
882	Swallow Bellied Mangalitsa	CC	GG	GG	GT	AC	GG	GG	CT	AA	GA	AT	CC	GG	GG	CT	AA	CT	GG	GG	CC	GG	TT	del--del--	GG	TC	CT	CC	TT	AA	CC	GG	AA	GG	GA	CC	TT	GG	AA	AA
883	Swallow Bellied Mangalitsa	CC	AA	GG	GT	AA	NA	GG	CC	AA	NA	TT	CC	GT	GG	TT	AA	CC	GG	GG	CC	GG	TT	del--del--	GG	CC	CT	CG	TT	AA	CC	GG	TA	GG	AA	CC	TT	GG	AA	AA
884	Swallow Bellied Mangalitsa	CT	GA	NA	TT	AC	NA	GG	CC	AA	GG	AT	CC	GT	GG	TT	AA	TT	GG	GG	CC	GG	TT	del--del--	GG	TC	TT	CG	TT	AA	CC	GG	TA	GG	AA	CC	TT	GG	AA	AA
885	Swallow Bellied Mangalitsa	CC	GG	GG	GT	AA	NA	GG	CC	AA	GA	AA	CC	GT	GG	TT	AA	CT	GG	GG	CC	GG	TT	del--del--	GA	CC	TT	CC	TT	AA	CC	GG	TT	GG	AA	CC	TT	GG	AA	AA
886	Swallow Bellied Mangalitsa	CT	GA	GG	TT	AC	AA	GG	CC	AA	NA	TT	CC	GT	GG	TT	AA	TT	GG	GG	CC	GG	TT	del--del--	GG	TC	TT	CC	TT	AA	CC	GG	TA	GG	AA	CC	TT	GG	AA	AA
887	Swallow Bellied Mangalitsa	CC	GG	NA	GT	AC	NA	GG	CC	AA	GG	AT	CC	GT	GG	CT	AA	CT	GG	GG	CC	GG	TT	del--del--	GG	TC	TT	CC	TT	AA	CC	GG	TA	GG	AA	CC	TT	GG	AA	AA
888	Swallow Bellied Mangalitsa	CC	GG	GG	TT	AA	NA	GG	CC	AA	NA	AT	TC	GT	GG	TT	AA	CT	GG	GG	CC	GG	TT	del--del--	GG	TC	TT	CC	TT	AA	CC	GG	TT	GG	AA	CC	TT	GG	AA	AA
889	Swallow Bellied Mangalitsa	CC	GG	GG	TT	AA	NA	GG	CC	AA	NA	AT	CC	TT	GG	TT	AA	CT	GG	GG	CC	GG	TT	del--del--	GG	TC	TT	CC	TT	AA	CC	GG	TT	GG	AA	CC	TT	GG	AA	AA
890	Swallow Bellied Mangalitsa	CC	AA	GG	GT	AA	GG	GG	CC	AA	NA	TT	CC	GT	GG	TT	AA	CC	GG	GG	CC	GG	TT	del--del--	GA	CC	TT	CG	TT	AA	CC	GG	TA	GG	AA	CC	TT	GG	AA	AA
891	Swallow Bellied Mangalitsa	CC	GA	GG	TT	AA	GG	GG	CC	AA	NA	TT	CC	GT	GG	TT	AA	CT	GG	GG	CC	GG	TT	del--del--	GG	TC	TT	CC	TT	AA	CC	GG	TT	GG	AA	CC	TT	GG	AA	AA
892	Swallow Bellied Mangalitsa	CT	AA	GG	TT	AC	GG	GG	CC	AA	GA	AA	TC	GT	GG	TT	AA	CC	GG	GG	CC	GG	TT	del--del--	GG	TC	CT	CG	TT	AA	NA	GG	TA	GG	GA	CC	TT	TG	AA	AA
893	Swallow Bellied Mangalitsa	CT	AA	GG	TT	AA	NA	GG	CT	AA	GA	AA	TC	GT	GG	CT	AA	CC	GG	GG	CC	GG	TT	del--del--	GG	TC	CT	CC	TT	AA	CC	GG	TA	GG	GA	CC	TT	TG	AA	AA
894	Swallow Bellied Mangalitsa	CT	GG	GG	TT	AC	NA	GG	CC	AA	GA	AT	CC	GT	GG	CT	AA	CC	GG	GG	CC	GG	TT	del--del--	GG	TC	CT	CG	TT	AA	CC	GG	TT	GG	AA	CC	TT	GG	AA	AA
895	Swallow Bellied Mangalitsa	CC	GG	GG	TT	AA	GG	GG	CT	AA	GA	TT	CC	GG	GG	TT	GA	CT	GG	GG	CC	GG	TT	del--del--	GA	TC	CT	CC	TT	AA	CC	NA	TT	GG	AA	CC	TT	TG	AA	AA
896	Swallow Bellied Mangalitsa	CC	GG	NA	GT	AA	NA	GG	CT	AA	GG	TT	TC	GG	GG	CT	AA	CC	GG	GG	CC	GG	TT	del--del--	GG	TC	TT	GG	TT	AA	CC	GG	TT	GG	AA	CC	TT	TG	AA	AA
897	Swallow Bellied Mangalitsa	CT	GG	GG	TT	AA	GG	GG	CT	AA	GA	TT	CC	GG	GG	TT	AA	CT	GG	GG	CC	GG	TT	del--del--	GA	TC	CT	CC	TT	AA	CC	GA	TA	GG	AA	CC	TT	TG	AA	AA
898	Swallow Bellied Mangalitsa	CC	GG	GG	GG	AA	GA	GG	CT	AA	NA	AT	TT	GG	GG	CC	AA	CT	GG	GG	CC	GG	TT	del--del--	GG	TC	CT	GG	TT	AA	CC	GG	TA	GG	AA	CC	TT	GG	AA	AA
899	Swallow Bellied Mangalitsa	CT	GG	GG	TT	AC	GG	GG	CC	AA	NA	TT	CC	GG	GG	TT	AA	CC	GG	GG	CC	GG	TT	del--del--	GA	TT	TT	CC	TT	AA	CC	GG	AA	GG	AA	CC	TT	GG	AA	AA
900	Swallow Bellied Mangalitsa	CT	GG	GG	GT	AC	GG	GG	CC	AA	AA	TT	CC	GG	GG	TT	AA	CC	GG	GG	CC	GG	TT	del--del--	GG	TC	TT	CC	TT	AA	CC	AA	AA	GG	AA	CC	TT	GG	AA	AA
901	Swallow Bellied Mangalitsa	NA	GG	GG	GT	NA	NA	NA	NA	NA	AA	NA	CC	NA	NA	CT	NA	CC	NA	GG	CC	NA	TT	NA	NA	TC	NA	NA	NA	NA	NA	NA	NA	GG	AA	CC	NA	NA	NA	NA
902	Swallow Bellied Mangalitsa	CT	GG	GG	TT	AC	GG	GG	CC	AA	GA	AT	CC	GG	GG	CT	AA	CC	GG	GG	CC	GG	TT	del--del--	GG	TC	TT	CC	TT	AA	CC	AA	AA	GG	AA	CC	TT	GG	AA	AA
903	Swallow Bellied Mangalitsa	CT	GG	GG	GT	AC	GG	GG	CC	AA	GA	TT	CC	GG	GG	TT	AA	CC	GG	GG	CC	GG	TT	del--del--	GG	TC	CT	CC	TT	AA	CC	NA	AA	GG	AA	CC	TT	GG	AA	AA
904	Swallow Bellied Mangalitsa	CT	GG	GG	GT	AC	GG	GG	CT	AA	NA	AT	CC	GG	GG	CT	NA	CC	GG	GG	CC	GG	TT	del--del--	GG	CC	TT	CC	TT	AA	CC	GG	AA	GG	GA	CC	TT	GG	AA	AA
905	Turopolje	CT	GA	GG	TT	CC	GG	GG	TT	AA	GA	AA	TC	GG	GG	CC	GA	CC	GG	GG	CC	AA	TT	insCCinsCC	GG	TC	TT	CG	TT	CC	CC	GG	AA	GG	GA	CC	TT	GG	AA	AA
906	Turopolje	NA	NA	NA	NA	CC	GA	GG	CT	AA	NA	AT	NA	GG	GG	NA	GG	NA	GG	NA	NA	AA	NA	insCCinsCC	GG	NA	CT	CG	TC	CC	CC	GG	AA	NA	NA	CC	TT	GG	AA	AA
907	Turopolje	NA	NA	NA	NA	CC	GA	GG	TT	AA	NA	AA	NA	GT	GG	NA	GA	NA	GG	NA	NA	AA	NA	insCCinsCC	GG	NA	CC	CG	TT	CC	CC	GG	AA	NA	NA	CC	TT	GG	AA	AA
908	Turopolje	TT	GA	GG	TT	CC	GA	GG	CT	AA	GA	AA	TC	GT	GG	CC	GA	CC	GG	GG	CC	AA	TT	insCCinsCC	GG	TT	TT	CC	TC	CC	CC	GG	AA	GG	AA	CC	TT	GG	AA	AA
909	Turopolje	CC	GA	GG	TT	CC	GG	GG	CT	AA	GA	AA	TT	GG	GG	CC	AA	CC	GG	GG	CC	AA	TT	insCCinsCC	GG	TC	TT	CG	TC	CC	CC	GG	AA	GG	AA	CC	TT	GG	AA	AA
910	Turopolje	TT	GG	GG	GG	CC	GA	GG	TT	AA	AA	AA	TT	GG	GG	CC	GA	CC	GG	GG	CC	AA	TT	insCCinsCC	GG	TC	CC	CG	CC	CC	CC	GG	AA	GG	GA	CC	TT	GG	AA	AA
911	Turopolje	TT	GG	GG	GT	CC	GA	GG	CT	AA	GA	AA	TT	GG	GG	CC	AA	CC	GG	GG	CC	AA	TT	insCCinsCC	GG	TC	CT	CG	TT	CC	CC	GG	AA	GG	GA	CC	TT	GG	AA	AA
912	Turopolje	CT	GA	GG	GG	CC	NA	GG	CT	AA	AA	AA	TC	GG	GG	CC	GA	CC	GG	GG	CC	AA	TT	insCCinsCC	GG	TT	TT	CG	TC	CC	CC	GG	AA	GG	AA	CC	TT	GG	AA	AA
913	Turopolje	CT	GA	GG	TT	CC	GA	GG	CT	AA	GA	AA	TC	GG	GG	CC	GA	CC	GG	GG	CC	AA	TT	insCCinsCC	GG	TC	CT	CG	TC	CC	CC	GG	AA	GG	AA	CC	TT	GG	AA	AA
914	Turopolje	TT	GG	GG	GT	CC	GG	GG	NA	AA	GA	AA	TC	GG	GG	CC	AA	CC	GG	GG	CC	AA	TT	insCCinsCC	GG	TC	CT	CC	TT	CC	CC	NA	AA	GG	GA	CC	TT	GG	AA	AA
915	Turopolje	TT	GA	GG	GT	CC	GG	GG	TT	AA	GA	AA	TC	GT	GG	CC	NA	CC	GG	GG	CC	AA	TT	insCCinsCC	GG	TC	CT	CG	TC	CC	CC	GA	AA	GG	GA	CC	TT	GG	AA	AA
916	Turopolje	CT	GG	NA	GT	CC	GG	GG	TT	AA	GG	AA	TC	GG	NA	CC	AA	CC	GG	GG	CC	AA	TT	insCCinsCC	GG	TC	TT	CC	TC	CC	CC	GG	AA	GG	GA	CC	TT	GG	AA	NA
917	Turopolje	TT	GG	GG	GT	CC	GG	GG	TT	AA	GA	AA	TT	GG	GG	CC	AA	CC	GG	GG	CC	AA	TT	insCCinsCC	GG	TT	CT	CG	TC	CC	CC	GG	AA	GG	AA	CC	TT	GG	AA	AA
918	Turopolje	TT	GG	GG	GT	CC	GA	GG	CT	AA	GA	AA	TT	GG	GG	CC	GA	CC	GG	GG	CC	AA	TT	insCCinsCC	GG	TT	TT	CC	CC	CC	CC	GG	AA	GG	GA	CC	TT	GG	AA	AA
919	Turopolje	TT	GA	GG	GT	CC	GA	GG	TT	AA	GA	AA	TT	GT	GG	CC	GA	CC	GG	GG	CC	AA	TT	insCCinsCC	GA	TC	TT	CG	TC	CC	CC	GG	NA	GG	GA	CC	TT	GG	AA	AA
920	Turopolje	CT	GG	NA	GT	CC	GG	GG	TT	AA	GG	AA	TC	GG	GG	CC	GA	CC	GG	GG	CC	AA	TT	insCCinsCC	GA	TT	CC	CC	TT	CC	CC	GG	AA	GG	AA	CC	TT	GG	AA	AA
921	Turopolje	CT	GG	GG	GT	CC	GG	GG	TT	AA	AA	AA	TT	GG	GG	CC	GA	CC	GG	GG	NA	AA	TT	insCCinsCC	GG	TT	TT	CG	TC	CC	CC	GG	AA	GG	AA	CC	TT	GG	AA	AA
922	Turopolje	CT	GA	GG	TT	CC	GG	GG	CT	AA	AA	AA	TT	GG	GG	CC	AA	CC	GG	GG	CC	AA	TT	insCCinsCC	GG	TT	CT	CG	TT	CC	CC	GG	AA	GG	AA	CC	TT	GG	AA	AA
923	Turopolje	CT	GA	GG	GT	CC	GG	GG	CT	AA	GA	AA	TT	GG	GG	CC	GA	CC	GG	GG	CC	AA	TT	insCCinsCC	GA	TT	CT	GG	TT	CC	CC	GG	AA	GG	GA	CC	TT	GG	AA	AA
924	Turopolje	TT	GA	GG	GT	CC	GA	GG	TT	AA	GA	AA	TT	GG	GG	CC	GA	CC	GG	GG	CC	AA	TT	insCCinsCC	GG	TT	CC	CG	CC	CC	CC	GG	AA	GG	AA	CC	TT	GG	AA	AA
925	Turopolje	CT	GG	NA	GT	CC	GA	GG	CT	AA	GG	AA	TT	GG	GG	CC	GA	CC	GG	GG	CC	AA	TT	insCCinsCC	GG	TT	CT	CG	TC	CC	CC	GG	AA	GG	AA	CC	TT	GG	AA	AA
926	Turopolje	NA	GA	GG	NA	CC	AA	GG	TT	AA	NA	AA	TC	GT	GG	CC	GA	CC	GG	GG	NA	AA	TT	insCCinsCC	GG	TC	CT	GG	TC	CC	CC	GG	AA	GG	GA	CC	TT	GG	AA	AA
927	Turopolje	TT	GA	GG	GT	CC	GG	GG	CT	AA	GA	AA	CC	GG	GG	CC	AA	CC	GG	GG	CC	AA	TT	insCCinsCC	GG	TC	TT	CG	TT	AC	CC	GG	AA	GG	AA	CC	TT	GG	AA	AA
928	Turopolje	TT	GG	GG	GT	CC	AA	GG	NA	AA	GA	AA	TC	GG	GG	CC	GA	CC	GG	GG	CC	AA	TT	insCCinsCC	GG	TT	CT	CG	TT	CC	CC	NA	AA	GG	AA	CC	TT	GG	AA	AA
929	Turopolje	NA	NA	NA	NA	CC	GA	GG	CT	AA	NA	AA	NA	GG	GG	NA	AA	NA	GG	NA	NA	AA	NA	insCCinsCC	GG	NA	CC	CC	TC	CC	CC	GG	AA	NA	NA	CC	TT	GG	AA	NA
930	Turopolje	CT	GA	GG	NA	CC	GA	GG	CT	AA	GA	AA	TT	GG	GG	CC	GA	CC	GG	GG	NA	NA	TT	insCCinsCC	GG	TC	CC	GG	TC	CC	CC	GG	AA	GG	GA	CC	TT	GG	AA	AA
931	Turopolje	CT	GG	NA	TT	CC	GG	GG	CT	AA	GG	AA	TT	GG	GG	CC	AA	CC	GG	GG	CC	AA	TT	insCCinsCC	GG	TT	CC	CG	CC	CC	CC	GG	AA	GG	AA	CC	TT	GG	AA	AA
932	Turopolje	TT	AA	GG	GG	CC	GG	GG	CT	AA	GA	AA	TT	NA	GG	CC	GA	CT	GG	GG	CC	AA	TT	insCCinsCC	GA	TC	TT	CC	TC	CC	CC	GG	AA	GG	AA	CC	TT	GG	AA	AA
933	Turopolje	TT	AA	GG	GG	CC	GG	GG	CT	AA	GA	AA	TT	GG	GG	CC	GA	CT	GG	GG	CC	AA	TT	insCCinsCC	GA	TC	TT	CC	TC	CC	CC	GG	AA	GG	AA	CC	TT	GG	AA	AA
934	Turopolje	CT	GG	NA	TT	CC	GG	GG	CT	AA	GG	AA	CC	GG	GG	CC	AA	CC	GG	GG	CC	AA	TT	insCCinsCC	GG	CC	CT	CC	TC	CC	CC	GG	AA	GG	GA	CC	TT	GG	AA	AA
935	Turopolje	CT	GA	GG	TT	CC	GG	GG	CT	AA	GA	AA	TC	GG	GG	CC	GA	CC	GG	GG	CC	AA	TT	insCCinsCC	GG	TC	CT	CG	CC	AC	CC	GG	AA	GG	AA	CC	TT	GG	AA	AA
936	Turopolje	CC	GG	GG	GG	CC	GG	GG	CT	AA	GA	AA	TC	GG	GG	CC	GA	CC	GG	GG	CC	AA	TT	insCCinsCC	GA	TT	CT	CC	TT	CC	CC	GG	AA	GG	AA	CC	TT	GG	AA	AA
937	Turopolje	TT	GG	GG	TT	CC	GG	GG	CT	AA	AA	AA	TT	GG	GG	CC	GA	CC	GG	GG	CC	AA	TT	insCCinsCC	GG	TC	TT	CG	TC	CC	NA	GG	AA	GG	AA	CC	TT	GG	AA	NA
938	Turopolje	TT	GA	GG	GT	CC	GG	GG	CT	AA	GA	AT	TT	GG	GG	CC	AA	CT	GG	GG	CC	AA	TT	insCCinsCC	AA	TC	TT	CC	TC	CC	CC	GG	TA	GG	AA	CC	TT	GG	AA	AA
939	Turopolje	CT	AA	GG	TT	CC	GA	GG	CT	AA	GA	AA	TT	GG	GG	CC	AA	CC	GG	GG	CC	AA	TT	insCCinsCC	GG	TT	CT	CG	CC	CC	CC	GG	AA	GG	GA	CC	TT	GG	AA	NA
940	Turopolje	TT	AA	GG	GG	CC	GG	GG	TT	AA	GA	AT	TT	GG	GG	CC	GA	CC	GG	GG	CC	AA	TT	insCCinsCC	GA	TC	CT	CC	TC	CC	CC	GG	TA	GG	AA	CC	TT	GG	AA	AA
941	Turopolje	CC	GA	NA	GT	CC	GG	GG	CT	AA	GG	AA	TC	GG	GG	CC	GA	CC	GG	GG	CC	AA	TT	insCCinsCC	GG	TC	CT	CG	TC	AC	CC	NA	AA	GG	AA	CC	TT	GG	AA	NA
942	Turopolje	TT	AA	GG	GG	CC	GG	GG	TT	AA	GA	AA	TT	GG	GG	CC	AA	CT	GG	GG	CC	AA	TT	insCCinsCC	AA	TC	CT	CC	TT	CC	CC	GG	AA	GG	AA	CC	TT	GG	AA	AA
943	Turopolje	CT	GA	GG	GT	CC	GA	GG	CC	AA	GA	AA	TT	GG	GG	CC	NA	CC	GG	GG	CC	AA	TT	insCCinsCC	GG	TT	TT	CC	TC	NA	CC	GG	AA	GG	GA	CC	TT	GG	AA	AA
944	Turopolje	TT	AA	GG	GT	CC	GG	NA	CT	AA	GA	AA	TT	GG	GG	CC	NA	CC	GG	GG	CC	AA	TT	insCCinsCC	GG	TT	TT	CC	TC	AC	CC	GG	AA	GG	AA	CC	TT	GG	AA	AA
945	Turopolje	CT	AA	GG	NA	CC	GG	GG	CT	AA	GA	AA	TC	GG	GG	CC	GA	CC	GG	GG	CC	AA	TT	insCCinsCC	GG	TT	CT	CC	TT	AC	CC	GG	AA	GG	AA	CC	TT	GG	AA	AA
946	Turopolje	TT	AA	GG	GG	CC	GA	GG	CT	AA	GA	AA	CC	GT	GG	CC	GA	CC	GG	GG	CC	AA	TT	insCCinsCC	GG	TT	TT	CG	TC	CC	CC	GG	AA	GG	GA	CC	TT	GG	AA	AA
947	Turopolje	CT	AA	GG	GT	CC	GG	GG	CT	AA	GA	AA	CC	GG	GG	CC	GA	CC	GG	GG	CC	AA	TT	insCCinsCC	GG	TT	CT	CC	TC	AC	CC	GG	AA	GG	AA	CC	TT	GG	AA	AA
948	Turopolje	CT	AA	GG	GT	CC	GG	GG	TT	AA	GA	AT	TT	GG	GG	CC	GA	CC	GG	GG	CC	AA	TT	insCCinsCC	GG	TC	CT	CC	TC	CC	CC	GG	AA	GG	AA	CC	TT	GG	AA	AA
949	Turopolje	CT	GG	GG	GT	CC	GG	GG	CT	AA	GA	AA	TC	GG	GG	CC	GA	CC	GG	GG	CC	AA	TT	insCCinsCC	GG	TC	TT	CG	TC	AC	CC	GG	AA	GG	GA	CC	TT	GG	AA	AA
950	Turopolje	TT	GG	GG	GT	CC	GA	GG	CC	AA	GA	AA	TT	GG	GG	CC	GA	CC	GG	GG	CC	AA	TT	insCCinsCC	GG	TT	TT	CC	TC	AC	CC	GG	AA	GG	GA	CC	TT	GG	AA	AA
951	Turopolje	TT	AA	GG	GT	CC	GG	GG	TT	AA	GA	AT	TT	GG	GG	CC	AA	CC	GG	GG	CC	AA	TT	insCCinsCC	GA	TC	TT	CC	TT	CC	CC	GG	TA	GG	AA	CC	TT	GG	AA	AA
